# Supplementary material for: Kinetically-driven reactivity of sulfinylamines enables direct conversion of carboxylic acids to sulfinamides
Source: Royal Society of Chemistry journal article supplement (doi:10.1039/d3sc04727j), 2023-01-01
Supplement: d3sc04727j1.pdf [file d3sc04727j1.pdf]

## Supporting Information

# Kinetically-Driven Reactivity of Sulfinylamines Enables Direct Conversion of Carboxylic Acids to Sulfinamides

Hang T. Dang, Arka Porey, Sachchida Nand, Ramon Trevino, Patrick Manning-Lorino, William B. Hughes, Seth Fremin, William Thompson, Shree Krishna Dhakal, Hadi D. Arman, and Oleg V. Larionov\*

Department of Chemistry, The University of Texas at San Antonio, San Antonio, Texas 78249, United States

oleg.larionov@utsa.edu

### Contents

|                                          |      |
|------------------------------------------|------|
| Materials and experimental details ..... | S1   |
| General procedures .....                 | S2   |
| Additional experimental studies .....    | S3   |
| Table S1 .....                           | S3   |
| Figure S1 .....                          | S4   |
| Sulfinamide products .....               | S4   |
| Computational data .....                 | S41  |
| X-ray crystallographic data .....        | S64  |
| NMR spectroscopic data .....             | S70  |
| References .....                         | S184 |

### Materials and experimental details

**Materials:** Anhydrous dichloromethane were collected under argon from an LC Technologies solvent purification system, having been passed through two columns packed with molecular sieves.

**Experimental equipment:** The photoinduced reactions were conducted in borosilicate glass test-tubes (8 mL capacity, Duran) fitted with GL14 screwcaps placed in a test-tube rack on a magnetic stirplate that was flanked by two 36W LED lights ( $\lambda_{\text{max}} = 400 \text{ nm}$ ,  $2.6 \text{ mW/cm}^2$ ). The temperature in the test-tube rack was maintained at 25–27 °C with an air flow from a compressed air line. Eight parallel reactions arranged in two rows of four tubes were typically carried out in one test-tube rack.

**Purification:** Column chromatography was performed using CombiFlash Rf-200 (Teledyne-Isco) automated flash chromatography system, as well as manually. Thin layer chromatography was carried out on silica gel-coated glass plates (Merck Kieselgel 60 F254). Plates were visualized under ultraviolet light (254 nm) and using a potassium permanganate stain.

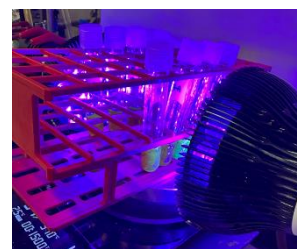

**Characterization:**  $^1\text{H}$ ,  $^{13}\text{C}$  and  $^{19}\text{F}$  NMR spectra were recorded at 500 MHz ( $^1\text{H}$ ), 125 MHz ( $^{13}\text{C}$ ) and 470.5 MHz ( $^{19}\text{F}$ ) on Bruker AVANCE III 500 instruments in  $\text{CDCl}_3$  or other specified deuterated solvents with and without tetramethylsilane (TMS) as an internal standard at 25 °C, unless specified otherwise. Chemical shifts ( $\delta$ ) are reported in parts per million (ppm) from tetramethylsilane ( $^1\text{H}$  and  $^{13}\text{C}$ ) and  $\text{CFCl}_3$  ( $^{19}\text{F}$ ). Coupling constants ( $J$ ) are in Hz. Proton multiplicity is assigned using the following abbreviations: singlet (s), doublet (d), triplet (t), quartet (q), quintet (quint.), septet (sept.), heptet (hept.), multiplet (m), broad (br).

Infrared measurements were carried out neat on a Bruker Vector 22 FT-IR spectrometer fitted with a Specac diamond attenuated total reflectance (ATR) module.

#### **General procedure for the conversion of amines to sulfinylamines (GP1)**

To an oven dried pressure tube equipped with a magnetic stir bar were added amine (1.0 eq) and dry benzene (1M) under positive flow of argon. The reaction mixture was cooled to 0 °C and thionyl chloride (1.3 equiv.) was added dropwise to the reaction mixture. The reaction mixture was allowed to warm to room temperature and then heated to 90 °C for 4 h. The resultant solid was filtered through a pad of anhydrous sodium sulfate and washed with diethyl ether. The filtrate was concentrated under reduced pressure to afford corresponding sulfinylamine that was used for the reactions with carboxylic acids without further purification.

#### **General procedure for photoinduced decarboxylative conversion of carboxylic acids to sulfonylamides (GP2)**

To a 8 mL test-tube equipped with a stir bar, acid (0.2 mmol), sulfinylamine (56 mg, 0.4 mmol, 2 equiv.), acridine **A1** (5.8 mg, 0.03 mmol, 10 mol%),  $\text{Cu}(\text{MeCN})_4\text{BF}_4$  (1.9–2.5 mg, 0.006–0.008 mmol, 3–4 mol%), dtbpy (2.1–2.7 mg, 0.008–0.01 mmol, 4–5 mol%) and a mixture of DCM and MeCN (2 : 1, v/v, 2 mL). Argon was passed on the surface of the reaction for 10 seconds. The test-tube was capped and the reaction mixture was irradiated with LED light ( $\lambda = 400 \text{ nm}$ ) while stirring at 25–27 °C for 16 h. For work-up, a saturated solution of EDTA (1.5 mL) was added, followed by DCM (5 mL). The reaction mixture was then extracted with DCM (3 × 5 mL). The organic phases were combined, dried over anhydrous  $\text{Na}_2\text{SO}_4$ , concentrated under reduced pressure and the remaining material was purified by flash chromatography on silica gel to give the product.

## Additional experimental and computational studies

**Table S1. Catalyst Performance in the Acridine-Catalyzed Direct Decarboxylative Sulfinamide Construction.<sup>a</sup>**

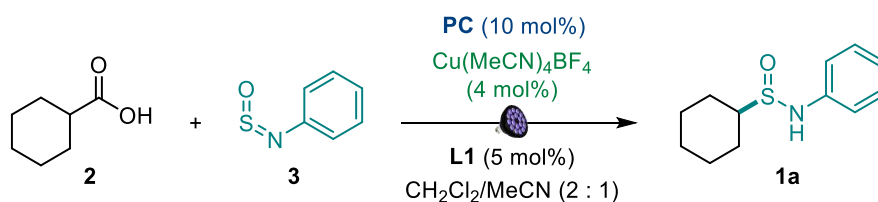

| Entry | Photocatalyst                                                                              | Yield, %       |
|-------|--------------------------------------------------------------------------------------------|----------------|
| 1     | Eosin Y at 450 nm                                                                          | 0              |
| 2     | Eosin Y at 420 nm                                                                          | 0              |
| 3     | Eosin Y at 400 nm                                                                          | 0              |
| 4     | Eosin Y disodium salt at 450 nm                                                            | 0              |
| 5     | 4CzIPN at 450 nm                                                                           | 0              |
| 6     | 4CzIPN at 420 nm                                                                           | 0              |
| 7     | 4CzIPN at 400 nm                                                                           | 0              |
| 8     | [Acr-Mes] <sup>+</sup> (BF <sub>4</sub> ) <sup>-</sup> at 400 nm                           | 0              |
| 9     | [Acr-Mes] <sup>+</sup> (BF <sub>4</sub> ) <sup>-</sup> at 450 nm                           | 0 <sup>b</sup> |
| 10    | Ir(ppy) <sub>3</sub> at 450 nm                                                             | 0 <sup>b</sup> |
| 11    | Ir(ppy) <sub>2</sub> (pq) at 450 nm                                                        | 0 <sup>b</sup> |
| 12    | (Ir[dF(CF <sub>3</sub> )ppy] <sub>2</sub> (dtbpy))PF <sub>6</sub> at 450 nm                | 0 <sup>b</sup> |
| 13    | Ru(bpm) <sub>2</sub> Cl <sub>2</sub> at 450 nm                                             | 0 <sup>b</sup> |
| 14    | Ru( <i>p</i> -CF <sub>3</sub> -bpy) <sub>3</sub> (BF <sub>4</sub> ) <sub>2</sub> at 450 nm | 0 <sup>b</sup> |
| 15    | TiO <sub>2</sub> , anatase                                                                 | 0 <sup>c</sup> |

<sup>a</sup> Reaction conditions: carboxylic acid **2** (0.2 mmol), sulfanylamine **3** prepared from aniline according to the GP1 (0.33 mmol), **A1** (10 mol%), Cu(MeCN)<sub>4</sub>BF<sub>4</sub> (4 mol%), **L1** (5 mol%), CH<sub>2</sub>Cl<sub>2</sub>/MeCN (2 : 1, 2 mL), LED light (400 nm), 16 h. Yield was determined by <sup>1</sup>H NMR spectroscopy with 1,4-dimethoxybenzene as an internal standard. <sup>b</sup> 2 mol% photocatalyst was used. <sup>c</sup> nanopowder, <25 nm particle size, 30 mg. 4CzIPN: 1,2,3,5-Tetrakis-(carbazol-9-yl)-4,6-dicyanobenzene, [Acr-Mes]<sup>+</sup>(BF<sub>4</sub>)<sup>-</sup>: 10-Phenyl-9-(2,4,6-trimethylphenyl)acridinium tetrafluoro-borate, Ir(ppy)<sub>3</sub>: Tris(2-phenylpyridine)iridium(III), Ir(ppy)<sub>2</sub>(pq): bis(2-phenylpyridine)(2-phenyl-quinoline)iridium(III), (Ir[dF(CF<sub>3</sub>)ppy]<sub>2</sub>(dtbpy))PF<sub>6</sub>: [4,4'-Bis(1,1-dimethylethyl)-2,2'-bipyridine-*N1,N1'*]-bis[3,5-difluoro-2-[5-(trifluoromethyl)-2-pyridinyl-*N*]phenyl-C]Iridium(III) hexafluorophosphate, Ru(bpm)<sub>2</sub>Cl<sub>2</sub>: Tris(2,2'-bipyrimide)-ruthenium(II) dichloride, Ru(*p*-CF<sub>3</sub>-bpy)<sub>3</sub>(BF<sub>4</sub>)<sub>2</sub>: Tris(2,2'-(*p*CF<sub>3</sub>)bi-pyridine)ruthenium(II) tetrafluoroborate.

### Kinetic studies of the reaction of acid 8 with sulfinylamine 3

The reaction with acid 8 ( $c = 0.1\text{M}$ ) and sulfinylamine 3 prepared from aniline according to GP1 (2, 2.5, 2.75, 3, 3.25, and 3.75 equiv.) was conducted for 8 h as described in GP2. The ratio of products 9 and 9a was obtained by  $^1\text{H}$  NMR with 1,3,5-trimethoxybenzene as an internal standard. The kinetic relationships described by the following equations:

$$\frac{[9]}{[9a]} = \frac{k_{\text{PhNSO}} \times [R \cdot] \times [3]}{k_o \times [R \cdot]}$$
$$\frac{[9]}{[9a]} = \frac{[3]}{k_{8a}} \times k_{\text{PhNSO}}$$

and  $k_o = 6.6 \times 10^7 \text{ s}^{-1}$  allow the calculation of the rate constant for the alkyl radical addition to sulfinylamine 3:  $k_{\text{PhNSO}} = 2.8 \cdot 10^8 \text{ M}^{-1} \cdot \text{s}^{-1}$ .

A.

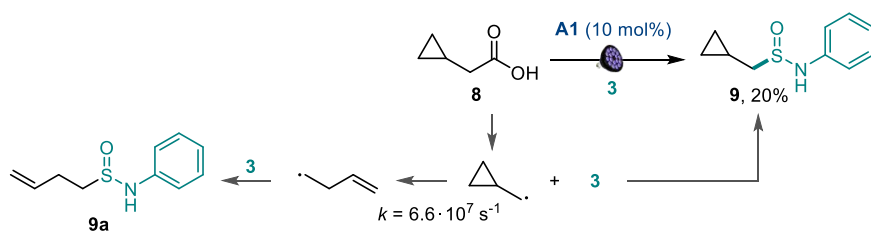

B.

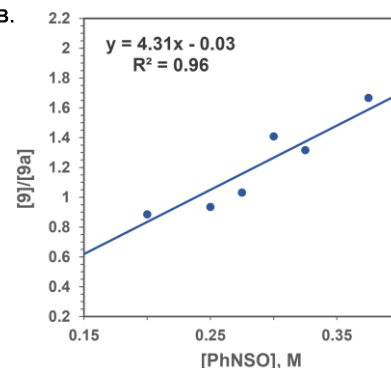

**Figure S1.** Kinetic studies of the reaction of acid 8 with sulfinylamine 3. **A.** Reaction pathway for the formation of sulfinamides 9 and 9a. **B.** Kinetic dependence of the ratio of products 9 and 9a on the concentration of sulfinylamine 3.

### Sulfinamide products

#### N-Phenylcyclohexanesulfinamide (1a)<sup>2</sup>

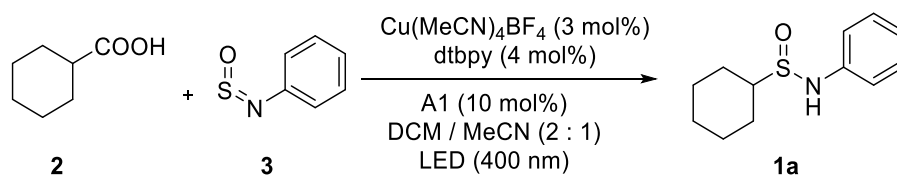

According to GP2, the reaction was carried out with cyclohexanecarboxylic acid (26 mg, 0.2 mmol), sulfinylamine 3 prepared from aniline according to the GP1 (70 mg, 0.5 mmol, 2.5 equiv.), acridine A1 (5.8 mg, 0.03 mmol, 10 mol%),  $\text{Cu}(\text{MeCN})_4\text{BF}_4$  (1.9 mg, 0.006 mmol, 3 mol%), dtbpy (2.2 mg, 0.008 mmol, 4 mol%) and DCM : MeCN (2 : 1, v/v, 2 mL). Argon was passed on the surface of the reaction for 10 seconds. The test-tube was capped and the reaction mixture was irradiated with LED light ( $\lambda = 400 \text{ nm}$ ) while stirring at 25–27 °C for 16 h. For work-up, a saturated solution of EDTA (1.5 mL) was added, followed by DCM (5 mL). The reaction mixture was then extracted with DCM (3 × 5 mL). The organic phases were combined, dried over anhydrous  $\text{Na}_2\text{SO}_4$ , concentrated under reduced pressure and the

remaining material was purified by flash chromatography on silica gel (EtOAc/hexane, 7 : 3 v/v) to give product **1a** (42 mg, 95%) as a colorless liquid.

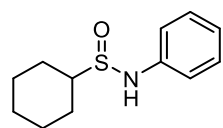

$^1\text{H NMR}$  (500 MHz,  $\text{CDCl}_3$ )  $\delta$  7.25 (2 H, t,  $J = 7.3$  Hz), 7.04 (2 H, d,  $J = 7.9$  Hz), 7.01 (1 H, t,  $J = 7.3$  Hz), 2.88 (1 H, tt,  $J = 11.3, 3.8$  Hz), 2.21–2.02 (2 H, m), 1.97–1.81 (2 H, m), 1.75–1.65 (1 H, m), 1.61–1.20 (6 H, m) ppm. –  $^{13}\text{C NMR}$  (125 MHz,  $\text{CDCl}_3$ ): 141.9, 129.43, 129.38, 122.8, 118.2, 118.1, 62.9, 26.4, 26.2, 25.5, 25.2, 25.0 ppm. – IR: 1602, 1498, 1446, 1032, 1028, 880. 742, 692  $\text{cm}^{-1}$ .

### N-Phenylnonane-1-sulfonamide (**1b**)

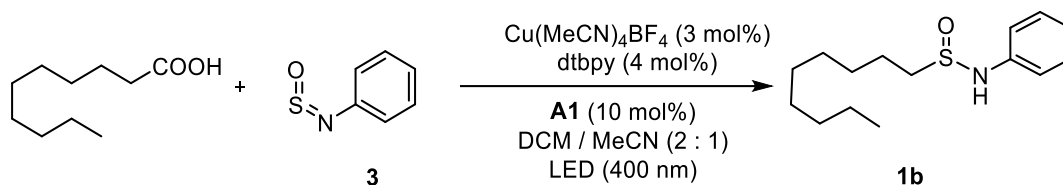

According to GP2, the reaction was carried out with decanoic acid (34 mg, 0.2 mmol), sulfinylamine **3** prepared from aniline according the GP1 (56 mg, 0.4 mmol, 2 equiv.), acridine **A1** (5.8 mg, 0.03 mmol, 10 mol%),  $\text{Cu}(\text{MeCN})_4\text{BF}_4$  (1.9 mg, 0.006 mmol, 3 mol%), dtbpy (2.2 mg, 0.008 mmol, 4 mol%) and DCM : MeCN (2 : 1, v/v, 2 mL). Argon was passed on the surface of the reaction for 10 seconds. The test-tube was capped and the reaction mixture was irradiated with LED light ( $\lambda = 400$  nm) while stirring at 25–27 °C for 16 h. For work-up, a saturated solution of EDTA (1.5 mL) was added, followed by DCM (5 mL). The reaction mixture was then extracted with DCM (3 × 5 mL). The organic phases were combined, dried over anhydrous  $\text{Na}_2\text{SO}_4$ , concentrated under reduced pressure and the remaining material was purified by flash chromatography on silica gel (EtOAc/hexane, 3 : 7 v/v) to give product **1b** (49 mg, 92%) as a colorless solid.

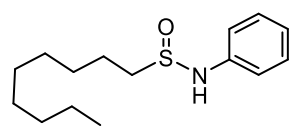

M.p.: 68–70 °C. –  $^1\text{H NMR}$  (500 MHz,  $\text{CDCl}_3$ ): 7.30–7.18 (3 H, m), 7.05 (2 H, d,  $J = 8.0$  Hz), 7.01 (1 H, t,  $J = 7.4$  Hz), 3.07–2.97 (2 H, m), 1.73 (2 H, p,  $J = 7.6$  Hz), 1.51–1.20 (12 H, m), 0.91 (3 H, t,  $J = 6.8$  Hz) ppm. –  $^{13}\text{C NMR}$  (125 MHz,  $\text{CDCl}_3$ ): 141.5, 129.4, 122.8, 118.1, 55.9, 31.8, 29.3, 29.24, 29.20, 28.6, 23.4, 22.7, 14.1 ppm. – IR: 3168, 2923, 2853, 1600, 1497, 1465, 1283, 1145, 1039, 889  $\text{cm}^{-1}$ . – HRMS: calcd for  $\text{C}_{15}\text{H}_{25}\text{NOS}$ : 268.1730, found 268.1727  $[\text{M}+\text{H}^+]$ .

### 1-Cyclopentyl-N-phenylmethanesulfonamide (**1c**)

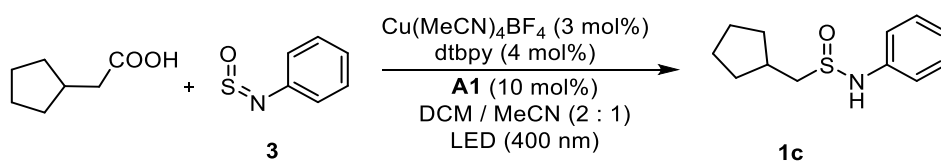

According to GP2, the reaction was carried out with 2-cyclopentylacetic acid (26 mg, 0.2 mmol), sulfinylamine **3** prepared from aniline according the GP1 (56 mg, 0.4 mmol, 2 equiv.), acridine **A1** (5.8 mg, 0.03 mmol, 10 mol%), Cu(MeCN)<sub>4</sub>BF<sub>4</sub> (1.9 mg, 0.006 mmol, 3 mol%), dtbpy (2.2 mg, 0.008 mmol, 4 mol%) and DCM : MeCN (2 : 1, v/v, 2 mL). Argon was passed on the surface of the reaction for 10 seconds. The test-tube was capped and the reaction mixture was irradiated with LED light ( $\lambda = 400$  nm) while stirring at 25–27 °C for 16 h. For work-up, a saturated solution of EDTA (1.5 mL) was added, followed by DCM (5 mL). The reaction mixture was then extracted with DCM (3 × 5 mL). The organic phases were combined, dried over anhydrous Na<sub>2</sub>SO<sub>4</sub>, concentrated under reduced pressure and the remaining material was purified by flash chromatography on silica gel (EtOAc/hexane, 7 : 3 v/v) to give product **1c** (44 mg, 98%) as a colorless solid.

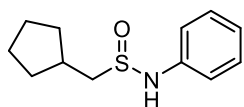

M.p.: 48–50 °C. – <sup>1</sup>H NMR (500 MHz, CDCl<sub>3</sub>): 7.44 (1 H, s), 7.24 (2 H, t, *J* = 7.7 Hz), 7.05 (2 H, d, *J* = 8.0 Hz), 7.00 (1 H, t, *J* = 7.4 Hz), 3.10 (1 H, dd, *J* = 12.8, 6.8 Hz), 3.02 (1 H, dd, *J* = 12.8, 8.2 Hz), 2.25 (1 H, hept, *J* = 7.9 Hz), 2.06–1.91 (1 H, m), 1.89–1.78 (1 H, m), 1.75–1.52 (4 H, m), 1.38–1.20 (3 H, m) ppm. – <sup>13</sup>C NMR (125 MHz, CDCl<sub>3</sub>): 141.6, 129.4, 122.7, 118.0, 62.0, 35.2, 32.5, 32.1, 24.94, 24.87 ppm. – IR: 3156, 2953, 2868, 1600, 1496, 1451, 1404, 1283, 1225, 1149, 1035, 888 cm<sup>-1</sup>. – HRMS: calcd for C<sub>12</sub>H<sub>17</sub>NOS: 224.1104, found 224.1102 [M+H<sup>+</sup>].

### 5-Chloro-N-phenylpentane-1-sulfonamide (**1d**)

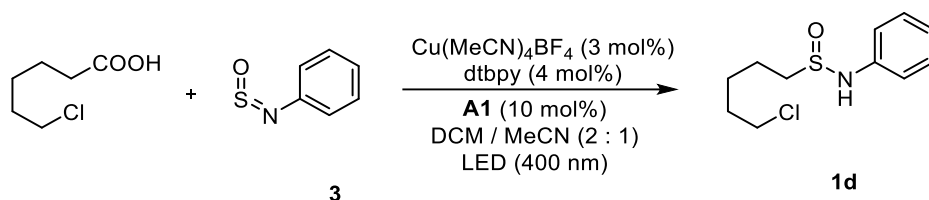

According to GP2, the reaction was carried out with 6-chlorohexanoic acid (30 mg, 0.2 mmol), sulfinylamine **3** prepared from aniline according the GP1 (56 mg, 0.4 mmol, 2 equiv.), acridine **A1** (5.8 mg, 0.03 mmol, 10 mol%), Cu(MeCN)<sub>4</sub>BF<sub>4</sub> (1.9 mg, 0.006 mmol, 3 mol%), dtbpy (2.2 mg, 0.008 mmol, 4 mol%) and DCM : MeCN (2 : 1, v/v, 2 mL). Argon was passed on the surface of the reaction for 10 seconds. The test-tube was capped and the reaction mixture was irradiated with LED light ( $\lambda = 400$  nm) while stirring at 25–27 °C for 16 h. For work-up, a saturated solution of EDTA (1.5 mL) was added, followed by DCM (5 mL). The reaction mixture was then extracted with DCM (3 × 5 mL). The organic phases were combined, dried over anhydrous Na<sub>2</sub>SO<sub>4</sub>, concentrated under reduced pressure and the remaining material was purified by flash chromatography on silica gel (EtOAc/hexane, 7 : 3 v/v) to give product **1d** (48 mg, 98%) as a colorless solid.

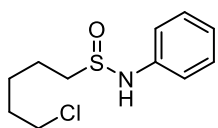

M.p.: 46–48 °C. – <sup>1</sup>H NMR (500 MHz, CDCl<sub>3</sub>): 7.30–7.23 (3 H, m), 7.09–7.00 (3 H, m), 3.53 (2 H, t, *J* = 6.5 Hz), 3.02 (2 H, td, *J* = 7.5, 3.7 Hz), 1.85–1.71 (4 H, m), 1.65–1.48 (2 H, m) ppm. – <sup>13</sup>C NMR (125 MHz, CDCl<sub>3</sub>): 141.3, 129.5, 123.0, 118.2, 55.5, 44.5, 32.1,

25.9, 22.8 ppm. – IR: 3152, 2920, 2851, 2634, 1599, 1496, 1461, 1405, 1342, 1283, 1148, 1029, 887  $\text{cm}^{-1}$ . – HRMS: calcd for  $\text{C}_{11}\text{H}_{16}\text{ClNOS}$ : 246.0714, found 246.0712  $[\text{M}+\text{H}^+]$ .

### 5-Bromo-*N*-phenylpentane-1-sulfinamide (1e)

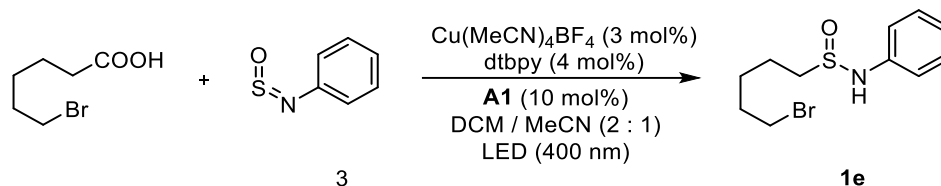

According to GP2, the reaction was carried out with 6-bromohexanoic acid (29 mg, 0.2 mmol), sulfinylamine **3** prepared from aniline according to the GP1 (56 mg, 0.4 mmol, 2 equiv.), acridine **A1** (5.8 mg, 0.03 mmol, 10 mol%),  $\text{Cu}(\text{MeCN})_4\text{BF}_4$  (1.9 mg, 0.006 mmol, 3 mol%), dtbpy (2.2 mg, 0.008 mmol, 4 mol%) and DCM : MeCN (2 : 1, v/v, 2 mL). Argon was passed on the surface of the reaction for 10 seconds. The test-tube was capped and the reaction mixture was irradiated with LED light ( $\lambda = 400 \text{ nm}$ ) while stirring at 25–27 °C for 16 h. For work-up, a saturated solution of EDTA (1.5 mL) was added, followed by DCM (5 mL). The reaction mixture was then extracted with DCM (3 × 5 mL). The organic phases were combined, dried over anhydrous  $\text{Na}_2\text{SO}_4$ , concentrated under reduced pressure and the remaining material was purified by flash chromatography on silica gel (EtOAc/hexane, 7 : 3 v/v) to give product **1e** (44 mg, 76%) as a colorless liquid.

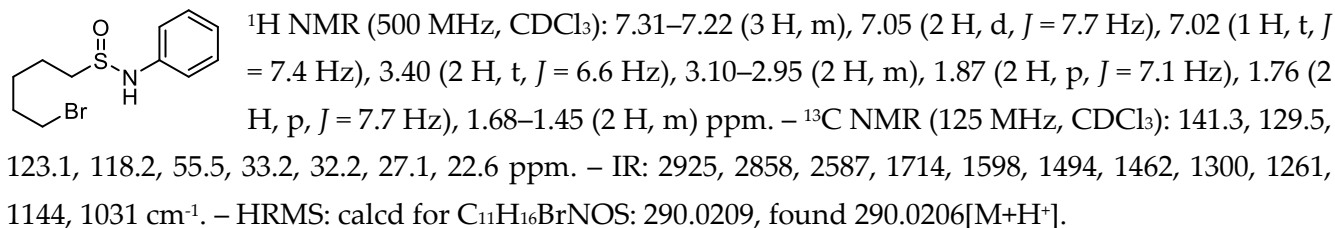

### 2-(4-Fluorophenyl)-*N*-phenylethane-1-sulfinamide (1f)

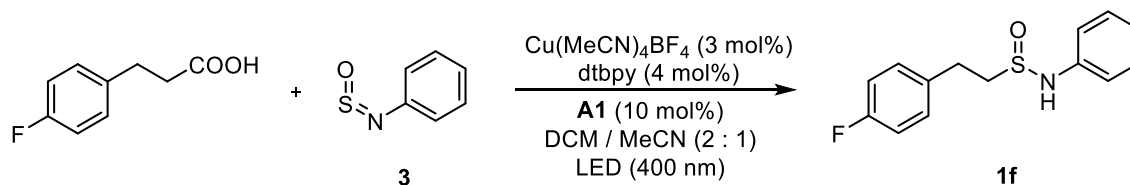

According to GP2, the reaction was carried out with 3-(4-fluorophenyl)propanoic acid (33 mg, 0.2 mmol), sulfinylamine **3** prepared from aniline according to the GP1 (56 mg, 0.4 mmol, 2 equiv.), acridine **A1** (5.8 mg, 0.03 mmol, 10 mol%),  $\text{Cu}(\text{MeCN})_4\text{BF}_4$  (1.9 mg, 0.006 mmol, 3 mol%), dtbpy (2.2 mg, 0.008 mmol, 4 mol%) and DCM : MeCN (2 : 1, v/v, 2 mL). Argon was passed on the surface of the reaction for 10 seconds. The test-tube was capped and the reaction mixture was irradiated with LED light ( $\lambda = 400 \text{ nm}$ ) while stirring at 25–27 °C for 16 h. For work-up, a saturated solution of EDTA (1.5 mL) was added,

followed by DCM (5 mL). The reaction mixture was then extracted with DCM (3 × 5 mL). The organic phases were combined, dried over anhydrous Na<sub>2</sub>SO<sub>4</sub>, concentrated under reduced pressure and the remaining material was purified by flash chromatography on silica gel (EtOAc/hexane, 7 : 3 v/v) to give product **1f** (35 mg, 67%) as a colorless solid.

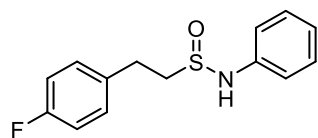

M.p.: 168–170 °C. – <sup>1</sup>H NMR (500 MHz, CDCl<sub>3</sub>): 7.32–7.23 (2 H, m), 7.22–7.13 (2 H, m), 7.08–6.92 (6 H, m), 3.34–3.22 (2 H, m), 3.05 (2 H, t, *J* = 7.4 Hz) ppm. – <sup>13</sup>C NMR (125 MHz, CDCl<sub>3</sub>): 161.8 (d, *J* = 245.2 Hz), 141.0, 134.1 (d, *J* = 3.4 Hz), 130.0 (d, *J* = 8.0 Hz), 129.5, 123.4, 118.5, 115.7 (d, *J* = 21.5 Hz), 57.0, 28.8 ppm. – <sup>19</sup>F NMR (471 MHz, CDCl<sub>3</sub>) δ -115.9 (t, *J* = 7.7 Hz). – IR: 2918, 2651, 1599, 1508, 1495, 1416, 1315, 1220, 1153, 1126, 1090, 1037, 940 cm<sup>-1</sup>. – HRMS: calcd for C<sub>14</sub>H<sub>14</sub>FNOS: 264.0853, found 264.0851[M+H<sup>+</sup>].

#### 4-Oxo-*N*,4-diphenylbutane-1-sulfonamide (**1g**)

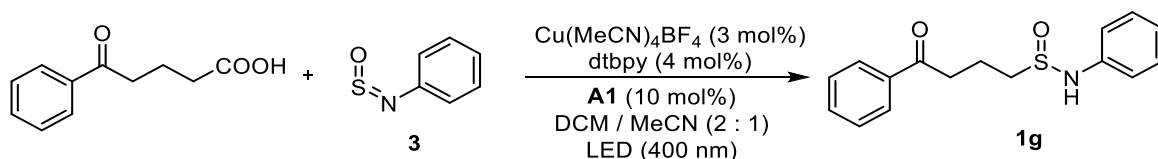

According to GP2, the reaction was carried out with 3-(((4-oxo-4-phenylbutyl)sulfinyl)amino)benzene-1-ylum (57 mg, 0.2 mmol), sulfanylamine **3** prepared from aniline according to the GP1 (56 mg, 0.4 mmol, 2 equiv.), acridine **A1** (5.8 mg, 0.03 mmol, 10 mol%), Cu(MeCN)<sub>4</sub>BF<sub>4</sub> (1.9 mg, 0.006 mmol, 3 mol%), dtbpy (2.2 mg, 0.008 mmol, 4 mol%) and DCM : MeCN (2 : 1, v/v, 2 mL). Argon was passed on the surface of the reaction for 10 seconds. The test-tube was capped and the reaction mixture was irradiated with LED light ( $\lambda$  = 400 nm) while stirring at 25–27 °C for 16 h. For work-up, a saturated solution of EDTA (1.5 mL) was added, followed by DCM (5 mL). The reaction mixture was then extracted with DCM (3 × 5 mL). The organic phases were combined, dried over anhydrous Na<sub>2</sub>SO<sub>4</sub>, concentrated under reduced pressure and the remaining material was purified by flash chromatography on silica gel (EtOAc/hexane, 8 : 2 v/v) to give product **1g** (37 mg, 65%) as a colorless solid.

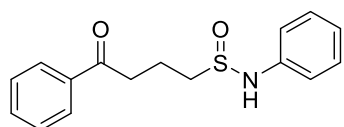

M.p.: 110–112 °C. – <sup>1</sup>H NMR (500 MHz, CDCl<sub>3</sub>): 7.95 (2 H, d, *J* = 1.5 Hz), 7.66–7.55 (1 H, m), 7.48 (2 H, t, *J* = 7.7 Hz), 7.26 (2 H, t, *J* = 7.9 Hz), 7.16–7.06 (3 H, m), 7.02 (1 H, t, *J* = 7.5 Hz), 3.31–3.02 (4 H, m), 2.23 (2 H, p, *J* = 7.2 Hz) ppm. – <sup>13</sup>C NMR (125 MHz, CDCl<sub>3</sub>): 198.7, 141.2, 136.5, 133.4, 129.5, 128.7, 128.0, 123.2, 118.4, 54.8, 36.7, 17.8 ppm. – IR: 3361, 3057, 2923, 2619, 1678, 1622, 1596, 1580, 1498, 1448, 1360, 1318, 1224 cm<sup>-1</sup>. – HRMS: calcd for C<sub>16</sub>H<sub>17</sub>NO<sub>2</sub>S: 288.1053, found 288.1051[M+H<sup>+</sup>].



### Methyl 5-((phenylamino)sulfinyl)pentanoate (**1h**)

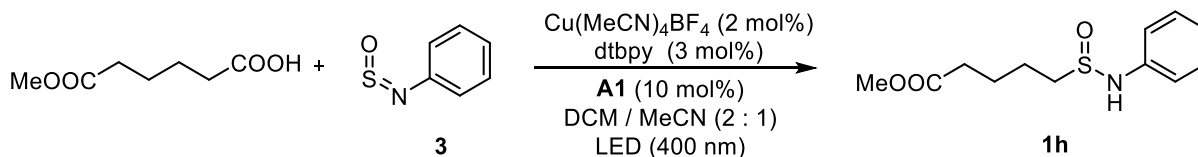

According to GP2, the reaction was carried out with 5-acetoxypentanoic acid (32 mg, 0.2 mmol), sulfinylamine **3** prepared from aniline according to the GP1 (56 mg, 0.4 mmol, 2 equiv.), acridine **A1** (5.8 mg, 0.03 mmol, 10 mol%), Cu(MeCN)<sub>4</sub>BF<sub>4</sub> (1.3 mg, 0.004 mmol, 2 mol%), dtbpy (1.6 mg, 0.006 mmol, 3 mol%) and DCM : MeCN (2 : 1, v/v, 2 mL). Argon was passed on the surface of the reaction for 10 seconds. The test-tube was capped and the reaction mixture was irradiated with LED light ( $\lambda = 400$  nm) while stirring at 25–27 °C for 16 h. For work-up, a saturated solution of EDTA (1.5 mL) was added, followed by DCM (5 mL). The reaction mixture was then extracted with DCM (3 × 5 mL). The organic phases were combined, dried over anhydrous Na<sub>2</sub>SO<sub>4</sub>, concentrated under reduced pressure and the remaining material was purified by flash chromatography on silica gel (EtOAc/hexane, 7 : 3 v/v) to give product **1h** (36 mg, 71%) as a colorless solid.

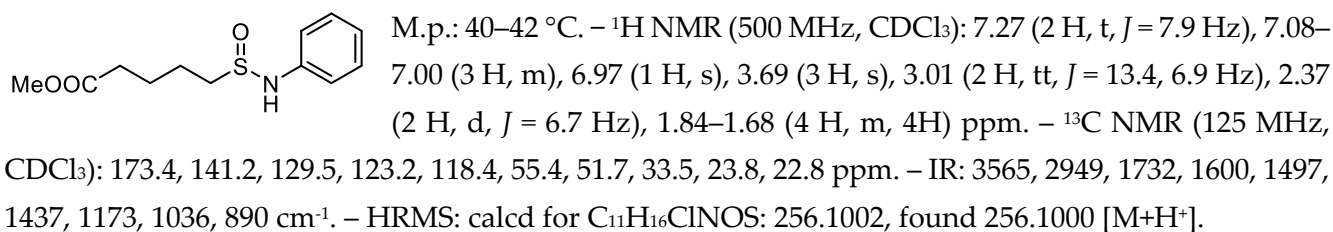

### N-Phenyl-3-(thiophen-2-yl)propane-1-sulfinamide (**1i**)

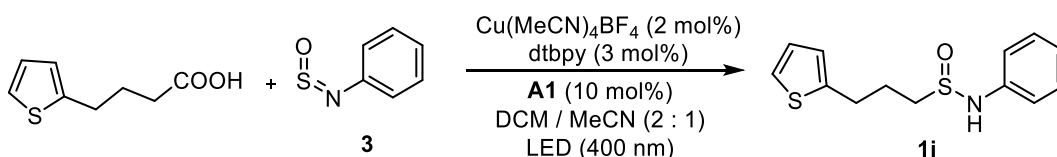

According to GP2, the reaction was carried out with 4-(thiophen-2-yl)butanoic acid (34 mg, 0.2 mmol), sulfinylamine **3** prepared from aniline according to the GP1 (56 mg, 0.4 mmol, 2 equiv.), acridine **A1** (5.8 mg, 0.03 mmol, 10 mol%), Cu(MeCN)<sub>4</sub>BF<sub>4</sub> (1.3 mg, 0.004 mmol, 2 mol%), dtbpy (1.6 mg, 0.006 mmol, 3 mol%) and DCM : MeCN (2 : 1, v/v, 2 mL). Argon was passed on the surface of the reaction for 10 seconds. The test-tube was capped and the reaction mixture was irradiated with LED light ( $\lambda = 400$  nm) while stirring at 25–27 °C for 16 h. For work-up, a saturated solution of EDTA (1.5 mL) was added, followed by DCM (5 mL). The reaction mixture was then extracted with DCM (3 × 5 mL). The organic phases were combined, dried over anhydrous Na<sub>2</sub>SO<sub>4</sub>, concentrated under reduced pressure and the remaining material was purified by flash chromatography on silica gel (EtOAc/hexane, 7 : 3 v/v) to give product **1i** (43 mg, 79%) as a colorless solid.

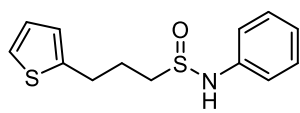

M.p.: 66–68 °C. – <sup>1</sup>H NMR (500 MHz, CDCl<sub>3</sub>): 7.31–7.13 (4 H, m), 7.11–7.00 (3 H, m), 6.95 (1 H, t, *J* = 4.3 Hz), 6.81 (1 H, d, *J* = 3.4 Hz), 3.13–2.88 (4 H, m), 2.12 (2 H, p, *J* = 7.6 Hz) ppm. – <sup>13</sup>C NMR (125 MHz, CDCl<sub>3</sub>): 143.0, 141.3, 129.5, 127.0, 125.0, 123.7, 123.1, 118.2, 54.7, 28.6, 25.4 ppm. – IR: 3152, 2922, 1599, 1496, 1439, 1405, 1319, 1283, 1227, 1149, 1038 cm<sup>-1</sup>. – HRMS: calcd for C<sub>13</sub>H<sub>15</sub>NOS<sub>2</sub>: 266.0668, found 266.0667 [M+H<sup>+</sup>].

#### 4,4-Difluoro-*N*-phenylcyclohexane-1-sulfinamide (**1j**)

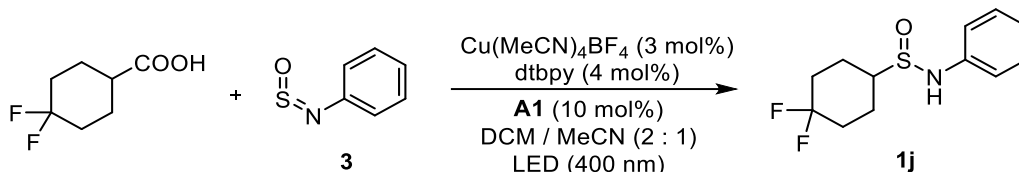

According to GP2, the reaction was carried out with 4,4-difluorocyclohexane-1-carboxylic acid (33 mg, 0.2 mmol), sulfinylamine **3** prepared from aniline according the GP1 (56 mg, 0.4 mmol, 2 equiv.), acridine **A1** (5.8 mg, 0.03 mmol, 10 mol%), Cu(MeCN)<sub>4</sub>BF<sub>4</sub> (1.9 mg, 0.006 mmol, 3 mol%), dtbpy (2.2 mg, 0.008 mmol, 4 mol%) and DCM : MeCN (2 : 1, v/v, 2 mL). Argon was passed on the surface of the reaction for 10 seconds. The test-tube was capped and the reaction mixture was irradiated with LED light ( $\lambda$  = 400 nm) while stirring at 25–27 °C for 16 h. For work-up, a saturated solution of EDTA (1.5 mL) was added, followed by DCM (5 mL). The reaction mixture was then extracted with DCM (3 × 5 mL). The organic phases were combined, dried over anhydrous Na<sub>2</sub>SO<sub>4</sub>, concentrated under reduced pressure and the remaining material was purified by flash chromatography on silica gel (EtOAc/hexane, 4 : 6 v/v) to give product **1j** (50 mg, 96%) as a colorless solid.

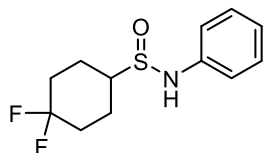

M.p.: 112–114 °C. – <sup>1</sup>H NMR (500 MHz, CDCl<sub>3</sub>): 7.28 (2 H, t, *J* = 7.9 Hz), 7.14–7.03 (4 H, m), 3.04–2.89 (1 H, m), 2.33–2.06 (4 H, m), 2.01–1.57 (4 H, m) ppm. – <sup>13</sup>C NMR (125 MHz, CDCl<sub>3</sub>): 141.3, 129.6, 123.3, 122.2 (t, *J* = 241.4 Hz), 118.2, 60.3, 32.2 (td, *J* = 24.9, 20.3 Hz), 23.0 (dd, *J* = 36.6, 8.5 Hz) ppm. – <sup>19</sup>F NMR (471 MHz, CDCl<sub>3</sub>)  $\delta$  -94.94 (d, *J* = 238.7 Hz), -100.34 (d, *J* = 238.5 Hz). – IR: 2918, 2851, 2620, 1593, 1540, 1497, 1448, 1372, 1292, 1270, 1202, 1181, 1147, 1121, 1101 cm<sup>-1</sup>. – HRMS: calcd for C<sub>12</sub>H<sub>15</sub>F<sub>2</sub>NOS: 260.0915, found 260.0912 [M+H<sup>+</sup>].

#### *N*-Phenylcycloheptanesulfinamide (**1k**)

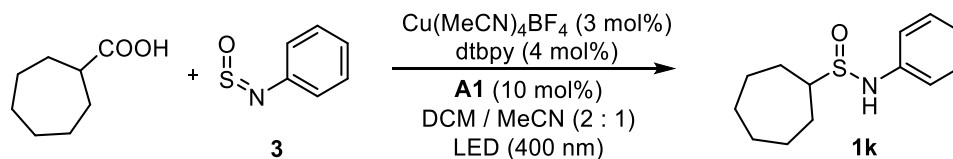

According to GP2, the reaction was carried out with cycloheptanecarboxylic acid (28 mg, 0.2 mmol), sulfinylamine **3** prepared from aniline according the GP1 (56 mg, 0.4 mmol, 2 equiv.), acridine **A1** (5.8 mg, 0.03 mmol, 10 mol%), Cu(MeCN)<sub>4</sub>BF<sub>4</sub> (1.9 mg, 0.006 mmol, 3 mol%), dtbpy (2.2 mg, 0.008 mmol, 4

mol%) and DCM : MeCN (2 : 1, v/v, 2 mL). Argon was passed on the surface of the reaction for 10 seconds. The test-tube was capped and the reaction mixture was irradiated with LED light ( $\lambda = 400$  nm) while stirring at 25–27 °C for 16 h. For work-up, a saturated solution of EDTA (1.5 mL) was added, followed by DCM (5 mL). The reaction mixture was then extracted with DCM (3 × 5 mL). The organic phases were combined, dried over anhydrous  $\text{Na}_2\text{SO}_4$ , concentrated under reduced pressure and the remaining material was purified by flash chromatography on silica gel (EtOAc/hexane, 2 : 8 v/v) to give product **1k** (48 mg, 99%) as a colorless solid.

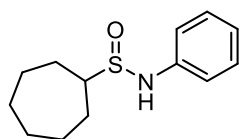

M.p.: 68–70 °C. –  $^1\text{H}$  NMR (500 MHz,  $\text{CDCl}_3$ ): 7.25 (2 H, t,  $J = 7.9$  Hz), 7.09–6.99 (3 H, m), 6.44 (1 H, s), 2.96 (1 H, tt,  $J = 9.3, 4.4$  Hz), 2.33–2.06 (2 H, m), 1.92–1.72 (3 H, m), 1.68–1.43 (7 H, m) ppm. –  $^{13}\text{C}$  NMR (125 MHz,  $\text{CDCl}_3$ ): 142.0, 129.4, 129.42, 129.37, 122.8, 118.20, 118.18, 118.1, 64.5, 28.7, 28.3, 27.6, 26.7, 26.12, 26.08 ppm. – IR: 2922, 2852, 1599, 1496, 1459, 1412, 1281, 1225, 1174, 1143, 1077, 1038, 885  $\text{cm}^{-1}$ . – HRMS: calcd for  $\text{C}_{13}\text{H}_{19}\text{NOS}$ : 260.1080, found 260.1082 [ $\text{M}+\text{Na}^+$ ].

### N-Phenylcyclopent-3-ene-1-sulfonamide (**1l**)

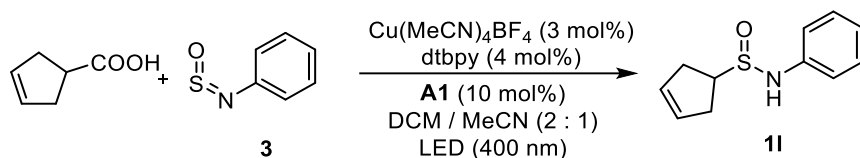

According to GP2, the reaction was carried out with cyclopent-3-ene-1-carboxylic acid (22 mg, 0.2 mmol), sulfenylamine **3** prepared from aniline according to the GP1 (56 mg, 0.4 mmol, 2 equiv.), acridine **A1** (5.8 mg, 0.03 mmol, 10 mol%),  $\text{Cu}(\text{MeCN})_4\text{BF}_4$  (1.9 mg, 0.006 mmol, 3 mol%), dtbpy (2.2 mg, 0.008 mmol, 4 mol%) and DCM : MeCN (2 : 1, v/v, 2 mL). Argon was passed on the surface of the reaction for 10 seconds. The test-tube was capped and the reaction mixture was irradiated with LED light ( $\lambda = 400$  nm) while stirring at 25–27 °C for 16 h. For work-up, a saturated solution of EDTA (1.5 mL) was added, followed by DCM (5 mL). The reaction mixture was then extracted with DCM (3 × 5 mL). The organic phases were combined, dried over anhydrous  $\text{Na}_2\text{SO}_4$ , concentrated under reduced pressure and the remaining material was purified by flash chromatography on silica gel (EtOAc/hexane, 6 : 4 v/v) to give product **1l** (34 mg, 82%) as a colorless liquid.

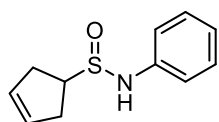

$^1\text{H}$  NMR (500 MHz,  $\text{CDCl}_3$ ): 7.30 – 7.21 (2 H, m), 7.14–6.87 (4 H, m), 5.92–5.68 (2 H, m), 3.80 (1 H, tt,  $J = 8.6, 4.1$  Hz), 3.00–2.86 (1 H, m), 2.78–2.53 (3 H, m) ppm. –  $^{13}\text{C}$  NMR (125 MHz,  $\text{CDCl}_3$ ): 141.8, 129.4, 129.1, 122.8, 118.0, 61.9, 33.8, 33.7 ppm. – IR: 1715, 1600, 1497, 1493, 1242, 1302, 1147, 1040, 890  $\text{cm}^{-1}$ . – HRMS: calcd for  $\text{C}_{11}\text{H}_{13}\text{NOS}$ : 208.0791, found 208.0789 [ $\text{M}+\text{H}^+$ ].

### *N*-Phenyl-2,3-dihydro-1*H*-indene-2-sulfinamide (**1m**)

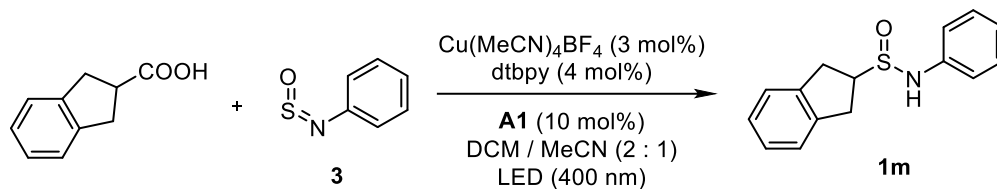

According to GP2, the reaction was carried out with 2,3-dihydro-1*H*-indene-2-carboxylic acid (32 mg, 0.2 mmol), sulfinylamine **3** prepared from aniline according to the GP1 (56 mg, 0.4 mmol, 2 equiv.), acridine **A1** (5.8 mg, 0.03 mmol, 10 mol%),  $\text{Cu}(\text{MeCN})_4\text{BF}_4$  (1.9 mg, 0.006 mmol, 3 mol%), dtbpy (2.2 mg, 0.008 mmol, 4 mol%) and DCM : MeCN (2 : 1, v/v, 2 mL). Argon was passed on the surface of the reaction for 10 seconds. The test-tube was capped and the reaction mixture was irradiated with LED light ( $\lambda = 400$  nm) while stirring at 25–27 °C for 16 h. For work-up, a saturated solution of EDTA (1.5 mL) was added, followed by DCM (5 mL). The reaction mixture was then extracted with DCM (3 × 5 mL). The organic phases were combined, dried over anhydrous  $\text{Na}_2\text{SO}_4$ , concentrated under reduced pressure and the remaining material was purified by flash chromatography on silica gel (EtOAc/hexane, 4 : 6 v/v) to give product **1m** (38 mg, 74%) as a colorless solid.

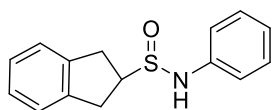

M.p.: 109–110 °C. –  $^1\text{H}$  NMR (500 MHz,  $\text{CDCl}_3$ ): 7.37–7.21 (6 H, m), 7.10–6.97 (4 H, m), 3.98 (1 H, tt,  $J = 8.4, 4.9$  Hz), 3.53 (1 H, dd,  $J = 17.2, 4.7$  Hz), 3.40–3.21 (3 H, m) ppm. –  $^{13}\text{C}$  NMR (125 MHz,  $\text{CDCl}_3$ ): 141.6, 140.4, 140.3, 129.5, 127.2, 127.1, 124.8, 124.5, 123.0, 118.2, 63.4, 33.8 ppm. – IR: 3151, 3044, 2898, 1705, 1641, 1598, 1496, 1485, 1459, 1319, 1282, 1224, 1147, 1055, 866  $\text{cm}^{-1}$ . – HRMS: calcd for  $\text{C}_{15}\text{H}_{15}\text{NOS}$ : 258.0947, found 258.0946 [ $\text{M}+\text{H}^+$ ].

### *N*-Phenyltetrahydro-2*H*-pyran-4-sulfinamide (**1n**)<sup>3</sup>

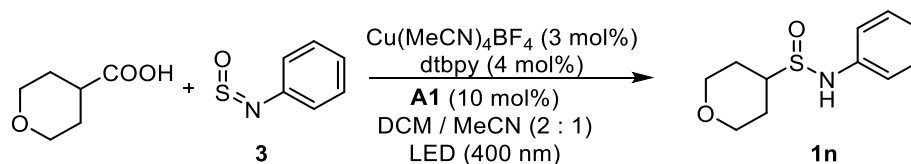

According to GP2, the reaction was carried out with tetrahydro-2*H*-pyran-4-carboxylic acid (26 mg, 0.2 mmol), sulfinylamine **3** prepared from aniline according to the GP1 (56 mg, 0.4 mmol, 2 equiv.), acridine **A1** (5.8 mg, 0.03 mmol, 10 mol%),  $\text{Cu}(\text{MeCN})_4\text{BF}_4$  (1.9 mg, 0.006 mmol, 3 mol%), dtbpy (2.2 mg, 0.008 mmol, 4 mol%) and DCM : MeCN (2 : 1, v/v, 2 mL). Argon was passed on the surface of the reaction for 10 seconds. The test-tube was capped and the reaction mixture was irradiated with LED light ( $\lambda = 400$  nm) while stirring at 25–27 °C for 16 h. For work-up, a saturated solution of EDTA (1.5 mL) was added, followed by DCM (5 mL). The reaction mixture was then extracted with DCM (3 × 5 mL). The organic phases were combined, dried over anhydrous  $\text{Na}_2\text{SO}_4$ , concentrated under reduced pressure and the remaining material was purified by flash chromatography on silica gel (EtOAc/hexane, 0 : 10 v/v) to give product **1n** (45 mg, 99%) as a colorless solid.

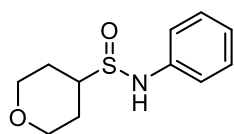

M.p.: 90–92 °C. – <sup>1</sup>H NMR (500 MHz, CDCl<sub>3</sub>): 7.32 (1 H, s), 7.26 (2 H, t, *J* = 7.8 Hz), 7.06 (2 H, d, *J* = 8.0 Hz), 7.03 (1 H, t, *J* = 7.0 Hz), 4.04 (1 H, td, *J* = 12.2, 7.2 Hz), 3.37 (1 H, td, *J* = 11.5, 2.4 Hz), 3.26 (1 H, td, *J* = 11.6, 2.4 Hz), 3.13 (1 H, tt, *J* = 11.7, 4.2 Hz), 2.02 (1 H, ddd, *J* = 13.2, 4.4, 2.2 Hz), 1.92 (1 H, ddd, *J* = 13.2, 4.4, 2.3 Hz), 1.88–1.78 (1 H, m), 1.77–1.66 (1 H, m) ppm. – <sup>13</sup>C NMR (125 MHz, CDCl<sub>3</sub>): 141.6, 129.5, 123.1, 118.1, 66.7, 66.6, 59.7, 27.0, 26.4 ppm. – IR: 3397, 3144, 2957, 2848, 1599, 1496, 1445, 1415, 1282, 1235, 1102, 1049, 881, 751 cm<sup>-1</sup>.

### Tert-butyl 3-((phenylamino)sulfinyl)piperidine-1-carboxylate (**1o**)

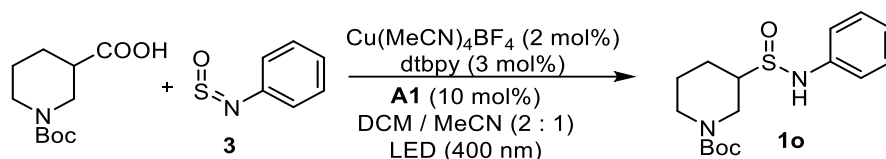

According to GP2, the reaction was carried out with 1-(tert-butoxycarbonyl)piperidine-3-carboxylic acid (49 mg, 0.2 mmol), sulfinylamine **3** prepared from aniline according to the GP1 (70 mg, 0.5 mmol, 2.5 equiv.), acridine **A1** (5.8 mg, 0.03 mmol, 10 mol%), Cu(MeCN)<sub>4</sub>BF<sub>4</sub> (1.3 mg, 0.004 mmol, 2 mol%), dtbpy (1.6 mg, 0.006 mmol, 3 mol%) and DCM : MeCN (2 : 1, v/v, 2 mL). Argon was passed on the surface of the reaction for 10 seconds. The test-tube was capped and the reaction mixture was irradiated with LED light ( $\lambda = 400$  nm) while stirring at 25–27 °C for 16 h. For work-up, a saturated solution of EDTA (1.5 mL) was added, followed by DCM (5 mL). The reaction mixture was then extracted with DCM (3 × 5 mL). The organic phases were combined, dried over anhydrous Na<sub>2</sub>SO<sub>4</sub>, concentrated under reduced pressure and the remaining material was purified by flash chromatography on silica gel (EtOAc/hexane, 6 : 4 v/v) to give product **1o** (53 mg, 82%) as a colorless liquid.

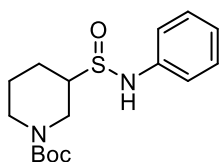

M.p.: 92–94 °C. – <sup>1</sup>H NMR (500 MHz, CDCl<sub>3</sub>): 7.32 (2 H, t, *J* = 7.7 Hz), 7.09 (2 H, d, *J* = 7.8 Hz), 7.05 (1 H, t, *J* = 7.4 Hz), 3.94 (1 H, s), 3.59 (1 H, s), 3.24 (1 H, s), 2.12–1.93 (2 H, m), 1.86–1.67 (2 H, m), 1.56–1.43 (12 H, m) ppm. – <sup>13</sup>C NMR (125 MHz, CDCl<sub>3</sub>): 154.5, 142.4, 129.5, 122.7, 118.0, 117.3, 79.4, 60.2, 43.6, 27.6, 24.53, 23.51 ppm. – IR: 3444, 3155, 2973, 2857, 1682, 1600, 1496, 1269, 1242, 1053, 887, 750 cm<sup>-1</sup>. – HRMS: calcd for C<sub>16</sub>H<sub>24</sub>N<sub>2</sub>O<sub>3</sub>S: 325.1580, found 325.1579 [M+H<sup>+</sup>].

### N-Phenyladamantane-1-sulfonamide (**1p**)

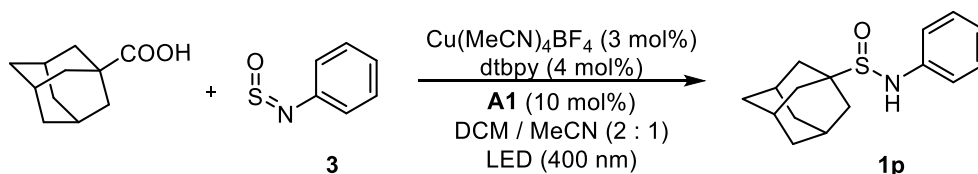

According to GP2, the reaction was carried out with adamantane-1-carboxylic acid (36 mg, 0.2 mmol), sulfinylamine **3** prepared from aniline according to the GP1 (56 mg, 0.4 mmol, 2 equiv.), acridine **A1** (5.8

mg, 0.03 mmol, 10 mol%), Cu(MeCN)<sub>4</sub>BF<sub>4</sub> (1.9 mg, 0.006 mmol, 3 mol%), dtbpy (2.2 mg, 0.008 mmol, 4 mol%) and DCM : MeCN (2 : 1, v/v, 2 mL). Argon was passed on the surface of the reaction for 10 seconds. The test-tube was capped and the reaction mixture was irradiated with LED light ( $\lambda = 400$  nm) while stirring at 25–27 °C for 16 h. For work-up, a saturated solution of EDTA (1.5 mL) was added, followed by DCM (5 mL). The reaction mixture was then extracted with DCM (3 × 5 mL). The organic phases were combined, dried over anhydrous Na<sub>2</sub>SO<sub>4</sub>, concentrated under reduced pressure and the remaining material was purified by flash chromatography on silica gel (EtOAc/hexane, 3.5 : 6.5 v/v) to give product **1p** (48 mg, 87%) as a colorless solid.

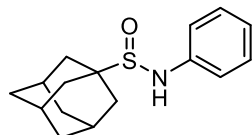

M.p.: 122–124 °C. – <sup>1</sup>H NMR (500 MHz, CDCl<sub>3</sub>): 7.26 (2 H, t,  $J = 7.9$  Hz), 7.04 (2 H d,  $J = 7.9$  Hz), 7.00 (1 H, t,  $J = 7.4$  Hz), 6.00 (1 H, s), 2.19 (3 H, t,  $J = 3.2$  Hz), 2.03–1.89 (6 H, m), 1.84–1.67 (6 H, m) ppm. – <sup>13</sup>C NMR (125 MHz, CDCl<sub>3</sub>): 142.4, 129.3, 122.6, 118.1, 58.3, 36.4, 34.7, 28.6 ppm. – IR: 3165, 3043, 2898, 2848, 1955, 1495, 1475, 1450, 1315, 1075, 1061 cm<sup>-1</sup>. – HRMS: calcd for C<sub>16</sub>H<sub>21</sub>NOS: 276.1417, found 276.1416 [M+H<sup>+</sup>].

### 3-Methyl-N-phenyloxetane-3-sulfonamide (**1q**)

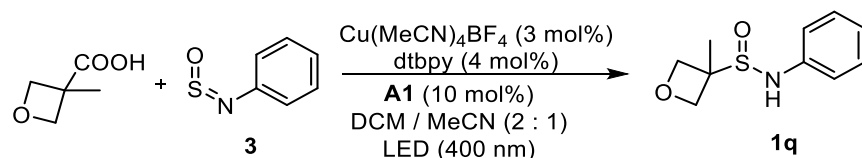

According to GP2, the reaction was carried out with 3-methyloxetane-3-carboxylic acid (23 mg, 0.2 mmol), sulfenylamine **3** prepared from aniline according the GP1 (56 mg, 0.4 mmol, 2 equiv.), acridine **A1** 5.8 mg, 0.03 mmol, 10 mol%), Cu(MeCN)<sub>4</sub>BF<sub>4</sub> (1.9 mg, 0.006 mmol, 3 mol%), dtbpy (2.2 mg, 0.008 mmol, 4 mol%) and DCM : MeCN (2 : 1, v/v, 2 mL). Argon was passed on the surface of the reaction for 10 seconds. The test-tube was capped and the reaction mixture was irradiated with LED light ( $\lambda = 400$  nm) while stirring at 25–27 °C for 16 h. For work-up, a saturated solution of EDTA (1.5 mL) was added, followed by DCM (5 mL). The reaction mixture was then extracted with DCM (3 × 5 mL). The organic phases were combined, dried over anhydrous Na<sub>2</sub>SO<sub>4</sub>, concentrated under reduced pressure and the remaining material was purified by flash chromatography on silica gel (EtOAc/hexane, 6 : 4 v/v) to give product **1q** (31 mg, 73%) as a colorless solid.

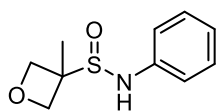

M.p.: 110–112 °C. – <sup>1</sup>H NMR (500 MHz, CDCl<sub>3</sub>): 7.35–7.28 (2 H, m), 7.15–7.05 (3 H, m), 5.81 (1 H, s), 5.06 (1 H, d,  $J = 7.2$  Hz), 4.95 (1 H, d,  $J = 7.5$  Hz), 4.65–4.60 (2 H, m), 1.76 (3 H, s) ppm. – <sup>13</sup>C NMR (125 MHz, CDCl<sub>3</sub>): 141.0, 129.6, 123.8, 118.9, 60.8, 15.9 ppm. – IR: 3419, 2874, 2621, 1705, 1634, 1601, 1539, 1498, 1454, 1362, 1218, 1158, 1029, 982 cm<sup>-1</sup>. – HRMS: calcd for C<sub>10</sub>H<sub>13</sub>NO<sub>2</sub>S: 212.0740, found 212.0737 [M+H<sup>+</sup>].

### 1-Methyl-4-oxo-N-phenylcyclohexane-1-sulfinamide (**1r**)

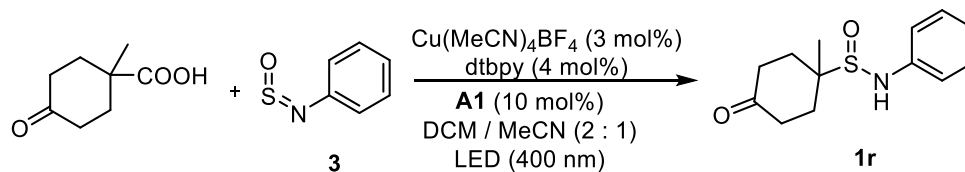

According to GP2, the reaction was carried out with 1-methyl-4-oxocyclohexane-1-carboxylic acid (31 mg, 0.2 mmol), sulfinylamine **3** prepared from aniline according the GP1 (56 mg, 0.4 mmol, 2 equiv.), acridine **A1** (5.8 mg, 0.03 mmol, 10 mol%),  $\text{Cu}(\text{MeCN})_4\text{BF}_4$  (1.9 mg, 0.006 mmol, 3 mol%), dtbpy (2.2 mg, 0.008 mmol, 4 mol%) and DCM : MeCN (2 : 1, v/v, 2 mL). Argon was passed on the surface of the reaction for 10 seconds. The test-tube was capped and the reaction mixture was irradiated with LED light ( $\lambda = 400 \text{ nm}$ ) while stirring at 25–27 °C for 16 h. For work-up, a saturated solution of EDTA (1.5 mL) was added, followed by DCM (5 mL). The reaction mixture was then extracted with DCM ( $3 \times 5 \text{ mL}$ ). The organic phases were combined, dried over anhydrous  $\text{Na}_2\text{SO}_4$ , concentrated under reduced pressure and the remaining material was purified by flash chromatography on silica gel (EtOAc/hexane, 6 : 4 v/v) to give product **1r** (50 mg, 99%) as a colorless solid.

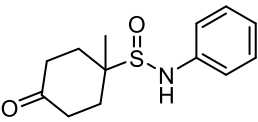

M.p.: 80–82 °C. –  $^1\text{H}$  NMR (500 MHz,  $\text{CDCl}_3$ ): 7.31–7.22 (3 H, m), 7.05 (2 H, d,  $J = 7.7 \text{ Hz}$ ), 7.02 (1 H, t,  $J = 7.4 \text{ Hz}$ ), 3.40 (2 H, t,  $J = 6.6 \text{ Hz}$ ), 3.10–2.95 (2 H, m), 1.87 (2 H, p,  $J = 7.1 \text{ Hz}$ ), 1.76 (2 H, p,  $J = 7.7 \text{ Hz}$ ), 1.68–1.45 (2 H, m) ppm. –  $^{13}\text{C}$  NMR (125 MHz,  $\text{CDCl}_3$ ): 141.3, 129.5, 123.1, 118.2, 55.5, 33.2, 32.2, 27.1, 22.6 ppm. – IR: 3419, 3185, 2955, 1712, 1599, 1497, 1416, 1339, 1281, 1219, 1140, 1057, 1029, 881  $\text{cm}^{-1}$ . – HRMS: calcd for  $\text{C}_{13}\text{H}_{17}\text{NO}_2\text{S}$ : 274.0872, found 274.0878 [ $\text{M}+\text{Na}^+$ ].

### (1s,3R,5S,7s)-4-Oxo-N-phenyladamantane-1-sulfinamide (**1s**)

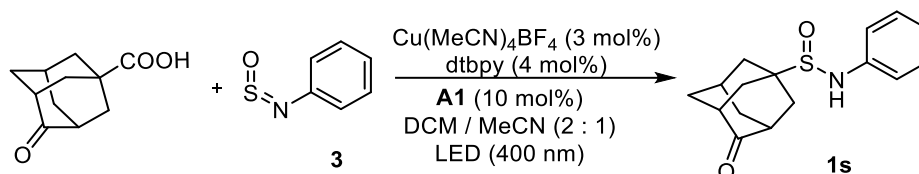

According to GP2, the reaction was carried out with (1s,3R,5S,7s)-4-oxoadamantane-1-carboxylic acid (39 mg, 0.2 mmol), sulfinylamine **3** prepared from aniline according the GP1 (56 mg, 0.4 mmol, 2 equiv.), acridine **A1** (5.8 mg, 0.03 mmol, 10 mol%),  $\text{Cu}(\text{MeCN})_4\text{BF}_4$  (1.9 mg, 0.006 mmol, 3 mol%), dtbpy (2.2 mg, 0.008 mmol, 4 mol%) and DCM : MeCN (2 : 1, v/v, 2 mL). Argon was passed on the surface of the reaction for 10 seconds. The test-tube was capped and the reaction mixture was irradiated with LED light ( $\lambda = 400 \text{ nm}$ ) while stirring at 25–27 °C for 16 h. For work-up, a saturated solution of EDTA (1.5 mL) was added, followed by DCM (5 mL). The reaction mixture was then extracted with DCM ( $3 \times 5 \text{ mL}$ ). The organic phases were combined, dried over anhydrous  $\text{Na}_2\text{SO}_4$ , concentrated under reduced

pressure and the remaining material was purified by flash chromatography on silica gel (EtOAc/hexane, 6 : 4 v/v) to give product **1s** (41 mg, 70%) as a colorless solid.

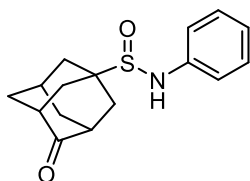

M.p.: 106–108 °C. – <sup>1</sup>H NMR (500 MHz, CDCl<sub>3</sub>): 7.30–7.23 (2 H, m), 7.11–6.99 (3 H, m), 6.17 (1 H, s), 2.72 (2 H, t, *J* = 3.1 Hz), 2.35 (1 H, p, *J* = 3.1 Hz), 2.28–2.11 (7 H, m), 2.08 (1 H, s) ppm. – <sup>13</sup>C NMR (125 MHz, CDCl<sub>3</sub>): 215.1, 141.8, 129.5, 123.1, 118.2, 57.2, 45.9, 45.8, 38.3, 38.2, 36.3, 35.8, 33.7, 27.9 ppm. – IR: 3184, 2926, 2857, 1719, 1599, 1496, 1454, 1403, 1281, 1224, 1061, 1031, 882 cm<sup>-1</sup>. – HRMS: calcd for C<sub>16</sub>H<sub>19</sub>NO<sub>2</sub>S: 290.1209, found 290.1204 [M+H<sup>+</sup>].

### Methyl 4-((phenylamino)sulfinyl)bicyclo[2.2.2]octane-1-carboxylate (**1t**)

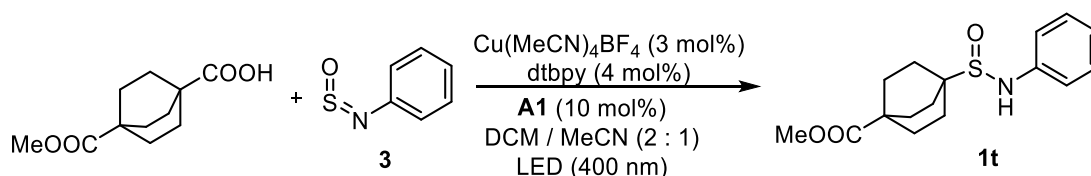

According to GP2, the reaction was carried out with 4-(methoxycarbonyl)bicyclo[2.2.2]octane-1-carboxylic acid (42 mg, 0.2 mmol), sulfinylamine **3** prepared from aniline according to the GP1 (56 mg, 0.4 mmol, 2 equiv.), acridine **A1** (5.8 mg, 0.03 mmol, 10 mol%), Cu(MeCN)<sub>4</sub>BF<sub>4</sub> (1.9 mg, 0.006 mmol, 3 mol%), dtbpy (2.2 mg, 0.008 mmol, 4 mol%) and DCM : MeCN (2 : 1, v/v, 2 mL). Argon was passed on the surface of the reaction for 10 seconds. The test-tube was capped and the reaction mixture was irradiated with LED light ( $\lambda = 400$  nm) while stirring at 25–27 °C for 16 h. For work-up, a saturated solution of EDTA (1.5 mL) was added, followed by DCM (5 mL). The reaction mixture was then extracted with DCM (3 × 5 mL). The organic phases were combined, dried over anhydrous Na<sub>2</sub>SO<sub>4</sub>, concentrated under reduced pressure and the remaining material was purified by flash chromatography on silica gel (EtOAc/hexane, 8 : 2 v/v) to give product **1t** (58 mg, 94%) as a colorless solid.

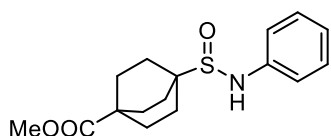

M.p.: 138–140 °C. – <sup>1</sup>H NMR (500 MHz, CDCl<sub>3</sub>): 7.30–7.22 (2 H, m), 7.04–6.98 (3 H, m), 5.89 (1 H, s), 3.68 (3 H, s), 2.05–1.79 (12 H, m) ppm. – <sup>13</sup>C NMR (125 MHz, CDCl<sub>3</sub>): 177.0, 141.9, 129.4, 122.9, 118.2, 57.3, 51.9, 39.0, 28.0, 23.9 ppm. – IR: 3041, 1726, 1597, 1453, 1238, 1053, 897, 785 cm<sup>-1</sup>. – HRMS: calcd for C<sub>16</sub>H<sub>21</sub>NO<sub>3</sub>S: 308.1315, found 308.1313 [M+H<sup>+</sup>].

### *tert*-Butyl 4-methyl-4-((phenylamino)sulfinyl)piperidine-1-carboxylate (**1u**)

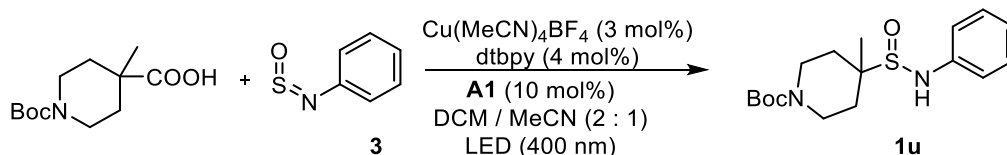



According to GP2, the reaction was carried out with 1-(*tert*-butoxycarbonyl)-4-methylpiperidine-4-carboxylic acid (49 mg, 0.2 mmol), sulfinylamine **3** prepared from aniline according to GP1 (56 mg, 0.4 mmol, 2 equiv.), acridine **A1** (5.8 mg, 0.03 mmol, 10 mol%), Cu(MeCN)<sub>4</sub>BF<sub>4</sub> (1.9 mg, 0.006 mmol, 3 mol%), dtbpy (2.2 mg, 0.008 mmol, 4 mol%) and DCM : MeCN (2 : 1, v/v, 2 mL). Argon was passed on the surface of the reaction for 10 seconds. The test-tube was capped and the reaction mixture was irradiated with LED light ( $\lambda = 400$  nm) while stirring at 25–27 °C for 16 h. For work-up, a saturated solution of EDTA (1.5 mL) was added, followed by DCM (5 mL). The reaction mixture was then extracted with DCM (3 × 5 mL). The organic phases were combined, dried over anhydrous Na<sub>2</sub>SO<sub>4</sub>, concentrated under reduced pressure and the remaining material was purified by flash chromatography on silica gel (EtOAc/hexane, 7 : 3 v/v) to give product **1u** (58 mg, 86%) as a colorless solid.

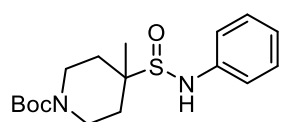

M.p.: 120–122 °C. – <sup>1</sup>H NMR (500 MHz, CDCl<sub>3</sub>): 7.29 (2 H, t, *J* = 7.9 Hz), 7.05 (1 H, t, *J* = 7.5 Hz), 7.02 (2 H, d, *J* = 8.7 Hz), 5.58 (1 H, s), 4.08–3.83 (2 H, m), 3.30–3.04 (2 H, m), 2.07–1.96 (1 H, m), 1.89 (1 H, ddd, *J* = 14.4, 10.5, 4.5 Hz), 1.70–1.58 (2 H, m), 1.48 (9 H, s), 1.40 (3 H, s) ppm. – <sup>13</sup>C NMR (125 MHz, CDCl<sub>3</sub>): 154.6, 141.7, 129.5, 123.3, 118.6, 78.00, 58.4, 39.1, 31.4, 28.4, 14.4 ppm. – IR: 3045, 2929, 2593, 1667, 1606, 1496, 1423, 1365, 1132, 1083, 1024, 906 cm<sup>-1</sup>. – HRMS: calcd for C<sub>17</sub>H<sub>26</sub>N<sub>2</sub>O<sub>3</sub>S: 361.1556, found 361.1553 [M+H<sup>+</sup>].

#### *N*-(4-Cyanophenyl)-4,4-difluorocyclohexane-1-sulfinamide (**4a**)

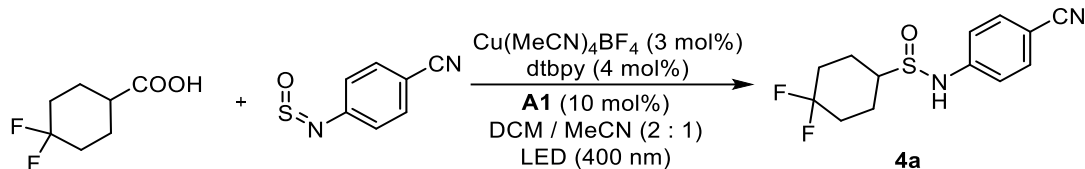

According to GP2, the reaction was carried out with 4,4-difluorocyclohexane-1-carboxylic acid (33 mg, 0.2 mmol), 4-(*N*-sulfonylidene)amino)benzonitrile (82 mg, 0.5 mmol, 2.5 equiv., prepared from 4-aminobenzonitrile, according to GP1), acridine **A1** (5.8 mg, 0.03 mmol, 10 mol%), Cu(MeCN)<sub>4</sub>BF<sub>4</sub> (1.9 mg, 0.006 mmol, 3 mol%), dtbpy (2.2 mg, 0.008 mmol, 4 mol%) and DCM : MeCN (2 : 1, v/v, 2 mL). Argon was passed on the surface of the reaction for 10 seconds. The test-tube was capped and the reaction mixture was irradiated with LED light ( $\lambda = 400$  nm) while stirring at 25–27 °C for 16 h. For work-up, a saturated solution of EDTA (1.5 mL) was added, followed by DCM (5 mL). The reaction mixture was then extracted with DCM (3 × 5 mL). The organic phases were combined, dried over anhydrous Na<sub>2</sub>SO<sub>4</sub>, concentrated under reduced pressure and the remaining material was purified by flash chromatography on silica gel (EtOAc/hexane, 9 : 1v/v) to give product **4a** (47 mg, 83%) as a colorless solid.

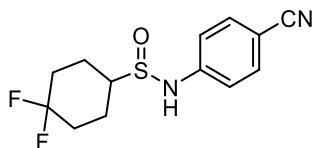

m.p.: 108–110 °C. <sup>1</sup>H NMR (500 MHz, CDCl<sub>3</sub>): 7.59 (1 H, s), 7.53 (2 H, d, *J* = 8.3 Hz), 7.06 (2 H, d, *J* = 8.3 Hz), 3.00 (1 H, tt, *J* = 8.8, 4.0 Hz), 2.35–2.05 (4 H, m), 2.01–1.69 (4 H, m) ppm. – <sup>13</sup>C NMR (125 MHz, CDCl<sub>3</sub>): 145.8, 133.8, 121.9

(t,  $J = 241.6$  Hz), 118.7, 117.0, 105.8, 60.7, 32.2 (td,  $J = 25.2, 13.7$  Hz), 22.7 (dd,  $J = 29.3, 8.4$  Hz) ppm. –  $^{19}\text{F}$  NMR (471 MHz,  $\text{CDCl}_3$ )  $\delta$  -95.00 (d,  $J = 240.0$  Hz), -100.70 (d,  $J = 241.5$  Hz). – IR: 3352, 3228, 2926, 2221, 1630, 1604, 1508, 1376, 1150, 1106, 960  $\text{cm}^{-1}$ . – HRMS: calcd for  $\text{C}_{13}\text{H}_{14}\text{F}_2\text{N}_2\text{OS}$ : 285.0868, found 285.0863 [ $\text{M}+\text{H}^+$ ].

#### 4-Methyl-*N*-(3-(trifluoromethoxy)phenyl)tetrahydro-2*H*-pyran-4-sulfinamide (**4b**)

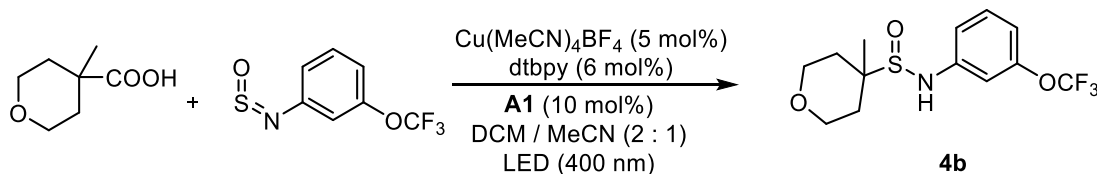

According to GP2, the reaction was carried out with 4-methyltetrahydro-2*H*-pyran-4-carboxylic acid (29 mg, 0.2 mmol), ((3-(trifluoromethoxy)phenyl)imino)-14-sulfanone (112 mg, 0.5 mmol, 2.5 equiv. prepared from 3-(trifluoromethoxy)aniline, according to GP1), acridine **A1** (5.8 mg, 0.03 mmol, 10 mol%),  $\text{Cu}(\text{MeCN})_4\text{BF}_4$  (3.1 mg, 0.01 mmol, 5 mol%),  $\text{dtbpy}$  (3.2 mg, 0.012 mmol, 6 mol%) and DCM : MeCN (2 : 1, v/v, 2 mL). Argon was passed on the surface of the reaction for 10 seconds. The test-tube was capped and the reaction mixture was irradiated with LED light ( $\lambda = 400$  nm) while stirring at 25–27 °C for 16 h. For work-up, a saturated solution of EDTA (1.5 mL) was added, followed by DCM (5 mL). The reaction mixture was then extracted with DCM (3 × 5 mL). The organic phases were combined, dried over anhydrous  $\text{Na}_2\text{SO}_4$ , concentrated under reduced pressure and the remaining material was purified by flash chromatography on silica gel (EtOAc/hexane, 5 : 5 v/v) to give product **4b** (50 mg, 77%) as a colorless liquid.

$^1\text{H}$  NMR (500 MHz,  $\text{CDCl}_3$ ): 7.23 (1 H, t,  $J = 8.1$  Hz), 6.94 (1 H, d,  $J = 8.3$  Hz), 6.88 (1 H, s), 6.84 (1 H, d,  $J = 8.0$  Hz), 6.42 (1 H, s), 3.99 (1 H, dt,  $J = 12.0, 4.2$  Hz), 3.93 (1 H, dt,  $J = 11.9, 4.2$  Hz), 3.69–3.57 (2 H, m), 2.13 (2 H, ddd,  $J = 13.5, 10.6, 4.7$  Hz), 2.02–1.93 (1 H, m), 1.65–1.51 (1 H, m), 1.44 (3 H, s) ppm. –  $^{13}\text{C}$  NMR (125 MHz,  $\text{CDCl}_3$ ): 145.0, 143.8, 130.5, 120.4 (q,  $J = 257.4$  Hz), 115.7, 114.7, 110.4, 63.38, 63.35, 57.8, 31.6, 31.0, 14.5 ppm. –  $^{19}\text{F}$  NMR (471 MHz,  $\text{CDCl}_3$ )  $\delta$  -57.7 (s). – IR: 3170, 2963, 2859, 1612, 1494, 1392, 1259, 1218, 1160, 1105, 1059, 1001, 881, 765, 749  $\text{cm}^{-1}$ . – HRMS: calcd for  $\text{C}_{13}\text{H}_{16}\text{F}_3\text{NO}_3\text{S}$ : 346.0695, found 346.0700 [ $\text{M}+\text{Na}^+$ ].

#### *N*-(2,4,5-Trifluorophenyl)tetrahydro-2*H*-pyran-4-sulfinamide (**4c**)

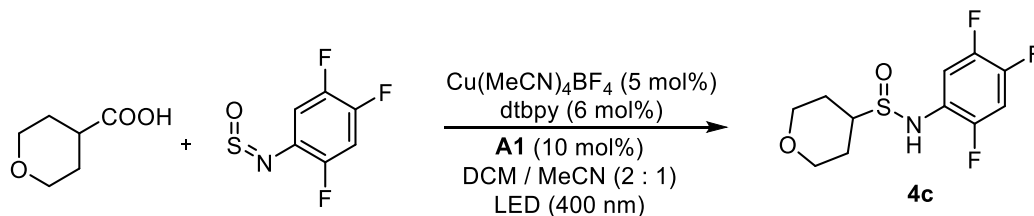

According to GP2, the reaction was carried out with tetrahydro-2*H*-pyran-4-carboxylic acid (26 mg, 0.2 mmol), ((2,4,5-trifluorophenyl)imino)-14-sulfanone (97 mg, 0.5 mmol, 2.5 equiv. prepared from 2,4,5-

trifluoroaniline according to GP1), acridine **A1** (5.8 mg, 0.03 mmol, 10 mol%), Cu(MeCN)<sub>4</sub>BF<sub>4</sub> (3.1 mg, 0.01 mmol, 5 mol%), dtbpy (3.2 mg, 0.012 mmol, 6 mol%) and DCM : MeCN (2 : 1, v/v, 2 mL). Argon was passed on the surface of the reaction for 10 seconds. The test-tube was capped and the reaction mixture was irradiated with LED light ( $\lambda = 400$  nm) while stirring at 25–27 °C for 16 h. For work-up, a saturated solution of EDTA (1.5 mL) was added, followed by DCM (5 mL). The reaction mixture was then extracted with DCM (3 × 5 mL). The organic phases were combined, dried over anhydrous Na<sub>2</sub>SO<sub>4</sub>, concentrated under reduced pressure and the remaining material was purified by flash chromatography on silica gel (EtOAc/hexane, 8 : 2 v/v) to give product **4c** (45 mg, 80%) as a colorless liquid.

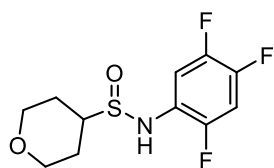

<sup>1</sup>H NMR (500 MHz, CDCl<sub>3</sub>): 7.17 (1 H, dt, J = 10.7, 7.9 Hz), 7.01 (1 H, td, J = 9.6, 7.6 Hz), 6.00 (1 H, s), 4.28–4.04 (2 H, m), 3.48 (2 H, tt, J = 11.6, 2.6 Hz), 3.08 (1 H, tt, J = 11.7, 4.2 Hz), 2.16–2.04 (1 H, m), 2.01–1.72 (3 H, m) ppm. – <sup>13</sup>C NMR (125 MHz, CDCl<sub>3</sub>): 149.6–147.1, 147.9–145.6 (m), 146.9–144.3 (m), 125.7 (dd, J = 14.4, 6.7 Hz), 108.8–108.3 (m), 105.9 (ddd, J = 24.2, 17.6, 5.4 Hz), 66.8, 66.6, 60.3, 26.4, 26.0 ppm. – <sup>19</sup>F NMR (471 MHz, CDCl<sub>3</sub>)  $\delta$  -129.31 – -133.71 (m), -137.66 – -141.50 (m). – IR: 3063, 2964, 2917, 2848, 1645, 1520, 1446, 1417, 1267, 1222, 1129, 1050, 878, 788, 751 cm<sup>-1</sup>. – HRMS: calcd for C<sub>11</sub>H<sub>12</sub>F<sub>3</sub>NO<sub>2</sub>S: 280.0614, found 280.0609 [M+H<sup>+</sup>].

### 3,3-Dimethoxy-1-methyl-N-(pyridin-3-yl)cyclobutane-1-sulfonamide (**4d**)

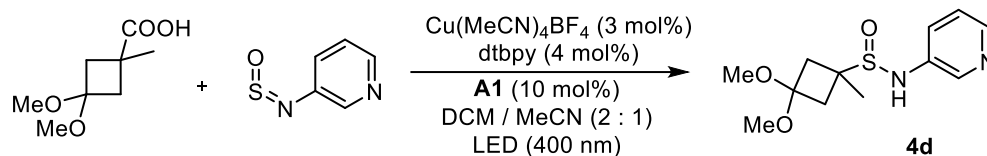

According to GP2, the reaction was carried out with 3,3-dimethoxy-1-methylcyclobutane-1-carboxylic acid (35 mg, 0.2 mmol), (pyridin-3-ylimino)-14-sulfanone (70 mg, 0.5 mmol, 2.5 equiv. prepared from 3-aminopyridine according to GP1), acridine **A1** (5.8 mg, 0.03 mmol, 10 mol%), Cu(MeCN)<sub>4</sub>BF<sub>4</sub> (1.9 mg, 0.006 mmol, 3 mol%), dtbpy (2.2 mg, 0.008 mmol, 4 mol%) and DCM : MeCN (2 : 1, v/v, 2 mL). Argon was passed on the surface of the reaction for 10 seconds. The test-tube was capped and the reaction mixture was irradiated with LED light ( $\lambda = 400$  nm) while stirring at 25–27 °C for 16 h. For work-up, a saturated solution of EDTA (1.5 mL) was added, followed by DCM (5 mL). The reaction mixture was then extracted with DCM (3 × 5 mL). The organic phases were combined, dried over anhydrous Na<sub>2</sub>SO<sub>4</sub>, concentrated under reduced pressure and the remaining material was purified by flash chromatography on silica gel (MeOH/DCM, 1.5 : 8.5 v/v) to give product **4d** (46 mg, 84%) as a colorless liquid.

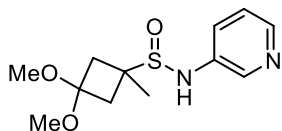

<sup>1</sup>H NMR (500 MHz, CDCl<sub>3</sub>): 8.37 (1 H, s), 8.28 (1 H, s), 7.43 (1 H, d, J = 7.0 Hz), 7.21 (1 H, dd, J = 8.6, 4.6 Hz), 6.48 (1 H, s), 3.21 (3 H, s), 3.18 (3 H, s), 2.84–2.62 (2 H, m), 2.21–2.12 (2 H, m), 1.63 (3 H, s) ppm. – <sup>13</sup>C NMR (125 MHz, CDCl<sub>3</sub>): 144.1,

140.2, 138.7, 124.8, 123.9, 97.8, 52.5, 48.71, 48.65, 39.1, 38.1, 19.7 ppm. – IR: 3053, 2970, 1789, 1722, 1463, 1412, 1265, 1094, 735  $\text{cm}^{-1}$ . – HRMS: calcd for  $\text{C}_{12}\text{H}_{18}\text{N}_2\text{O}_3\text{S}$ : 293.0930, found 293.0932 [ $\text{M}+\text{Na}^+$ ].

### N-(6-Methylpyridin-2-yl)cyclopent-3-ene-1-sulfinamide (**4e**)

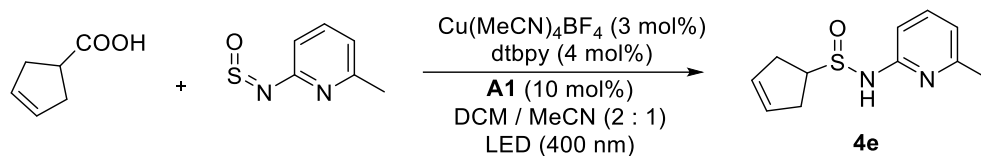

According to GP2, the reaction was carried out with cyclopent-3-ene-1-carboxylic acid (22 mg, 0.2 mmol), ((6-methylpyridin-2-yl)imino)-14-sulfanone (77 mg, 0.5 mmol, 2.5 equiv. prepared from 1.0 equiv. 2-amino-6-methylpyridine according to modified GP1 with 2.0 equiv. triethylamine and 1.0 equiv. thionyl chloride in 0.6 (M) benzene under reflux for 2 h), acridine **A1** (5.8 mg, 0.03 mmol, 10 mol%),  $\text{Cu}(\text{MeCN})_4\text{BF}_4$  (1.9 mg, 0.006 mmol, 3 mol%), dtbpy (2.2 mg, 0.008 mmol, 4 mol%) and DCM : MeCN (2 : 1, v/v, 2 mL). Argon was passed on the surface of the reaction for 10 seconds. The test-tube was capped and the reaction mixture was irradiated with LED light ( $\lambda = 400 \text{ nm}$ ) while stirring at 25–27 °C for 16 h. For work-up, a saturated solution of EDTA (1.5 mL) was added, followed by DCM (5 mL). The reaction mixture was then extracted with DCM (3 × 5 mL). The organic phases were combined, dried over anhydrous  $\text{Na}_2\text{SO}_4$ , concentrated under reduced pressure and the remaining material was purified by flash chromatography on silica gel (EtOAc/hexane, 9 : 1 v/v) to give product **4e** (40 mg, 90%) as a colorless solid.

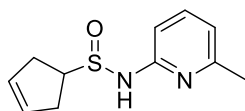

m.p.: 138–140 °C. –  $^1\text{H}$  NMR (500 MHz,  $\text{CDCl}_3$ ): 7.45 (2 H, t,  $J = 7.8 \text{ Hz}$ ), 6.75 (2 H, t,  $J = 8.5 \text{ Hz}$ ), 5.80–5.70 (2 H, m), 3.79 (1 H, tt,  $J = 8.9, 4.5 \text{ Hz}$ ), 2.94 (1 H, d,  $J = 17.8 \text{ Hz}$ ), 2.82–2.63 (3 H, m), 2.46 (3 H, s) ppm. –  $^{13}\text{C}$  NMR (125 MHz,  $\text{CDCl}_3$ ): 157.6,

154.1, 138.6, 129.2, 129.1, 117.2, 106.8, 61.3, 33.6, 33.4, 24.1 ppm. – IR: 3142, 2921, 2849, 1595, 1577, 1454, 1398, 1220, 1042, 948, 786  $\text{cm}^{-1}$ . – HRMS: calcd for  $\text{C}_{11}\text{H}_{14}\text{N}_2\text{OS}$ : 245.0719, found 245.0723 [ $\text{M}+\text{Na}^+$ ].

### N-(5-Bromopyrimidin-2-yl)-5-chloropentane-1-sulfinamide (**4f**)

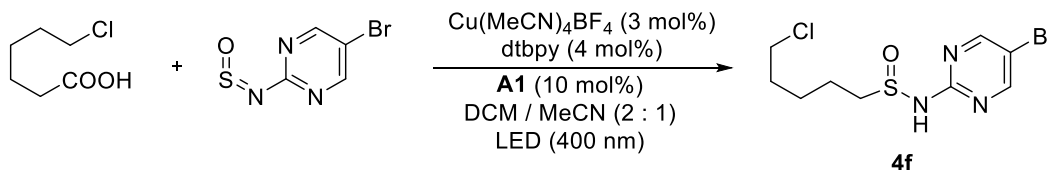

According to GP2, the reaction was carried out with 6-chlorohexanoic acid (30 mg, 0.2 mmol), ((5-bromopyrimidin-2-yl)imino)-14-sulfanone (110 mg, 0.5 mmol, 2.5 equiv. prepared from 1.0 equiv. 2-amino-5-bromopyrimidine, according to modified GP1 with 2.0 equiv. triethylamine and 1.0 equiv. thionyl chloride in 0.6M solution in benzene under reflux for 2 h.), acridine **A1** (5.8 mg, 0.03 mmol, 10

mol%), Cu(MeCN)<sub>4</sub>BF<sub>4</sub> (1.9 mg, 0.006 mmol, 3 mol%), dtbpy (2.2 mg, 0.008 mmol, 4 mol%) and DCM : MeCN (2 : 1, v/v, 2 mL). Argon was passed on the surface of the reaction for 10 seconds. The test-tube was capped and the reaction mixture was irradiated with LED light ( $\lambda = 400$  nm) while stirring at 25–27 °C for 16 h. For work-up, a saturated solution of EDTA (1.5 mL) was added, followed by DCM (5 mL). The reaction mixture was then extracted with DCM (3 × 5 mL). The organic phases were combined, dried over anhydrous Na<sub>2</sub>SO<sub>4</sub>, concentrated under reduced pressure and the remaining material was purified by flash chromatography on silica gel (EtOAc/hexane, 8 : 2 v/v) to give product **4f** (46 mg, 70%) as a colorless liquid.

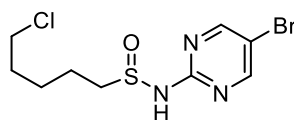

<sup>1</sup>H NMR (500 MHz, CDCl<sub>3</sub>): 8.69 (1 H, s), 8.52 (2 H, d, J = 1.1 Hz), 3.55 (2 H, t, J = 6.5 Hz), 3.10 (2 H, td, J = 7.4, 3.0 Hz), 1.88–1.78 (4 H, m), 1.73–1.58 (2 H, m) ppm. – <sup>13</sup>C NMR (125 MHz, CDCl<sub>3</sub>): 159.0, 158.4, 111.9, 54.9, 44.5, 32.1, 25.9, 22.3 ppm. – IR: 3178, 2917, 2849, 1601, 1497, 1468, 1285, 1230, 1081, 1029, 888, 748 cm<sup>-1</sup>.

#### N-(Benzo[d]thiazol-5-yl)-1-methylcyclohexane-1-sulfonamide (**4g**)

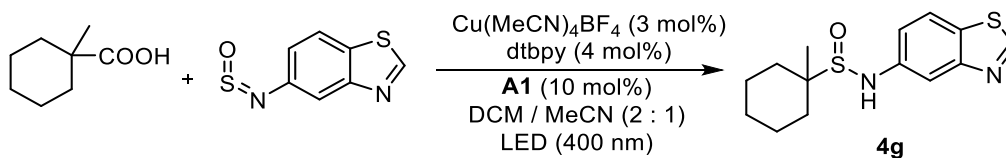

According to GP2, the reaction was carried out with 1-methylcyclohexane-1-carboxylic acid (28 mg, 0.2 mmol), ((1-phenylethyl)imino)-14-sulfanone (98 mg, 0.5 mmol, 2.5 equiv. prepared from 1,3-benzothiazol-5-amine according to GP1), acridine A1 (5.8 mg, 0.03 mmol, 10 mol%), Cu(MeCN)<sub>4</sub>BF<sub>4</sub> (1.9 mg, 0.006 mmol, 3 mol%), dtbpy (2.2 mg, 0.008 mmol, 4 mol%) and DCM : MeCN (2 : 1, v/v, 2 mL). Argon was passed on the surface of the reaction for 10 seconds. The test-tube was capped and the reaction mixture was irradiated with LED light ( $\lambda = 400$  nm) while stirring at 25–27 °C for 16 h. For work-up, a saturated solution of EDTA (1.5 mL) was added, followed by DCM (5 mL). The reaction mixture was then extracted with DCM (3 × 5 mL). The organic phases were combined, dried over anhydrous Na<sub>2</sub>SO<sub>4</sub>, concentrated under reduced pressure and the remaining material was purified by flash chromatography on silica gel (EtOAc/hexane, 7 : 3 v/v) to give product **4g** (55 mg, 93%) as a colorless liquid.

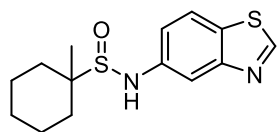

<sup>1</sup>H NMR (500 MHz, CDCl<sub>3</sub>): 8.95 (1 H, s), 7.76 (1 H, s), 7.70 (1 H, d, J = 8.6 Hz), 7.15 (1 H, d, J = 8.2 Hz), 6.26 (1 H, s), 1.93–1.84 (1 H, m), 1.84–1.44 (9 H, m), 1.35 (3 H, s) ppm. – <sup>13</sup>C NMR (125 MHz, CDCl<sub>3</sub>): 155.2, 154.2, 141.7, 127.6, 122.2, 117.6, 111.9, 60.4, 32.1, 30.8, 25.5, 21.8, 21.6, 15.8 ppm. – IR: 2927, 2854, 1596, 1544, 1448, 1403, 1269, 1104, 1069, 998, 869, 799, 734 cm<sup>-1</sup>. – HRMS: calcd for C<sub>14</sub>H<sub>18</sub>N<sub>2</sub>O<sub>2</sub>S: 317.0753 found 317.0762 [M+Na<sup>+</sup>].

### N-(4-Chlorophenethyl)-5-(2,5-dimethylphenoxy)-2-methylpentane-2-sulfinamide (4h)

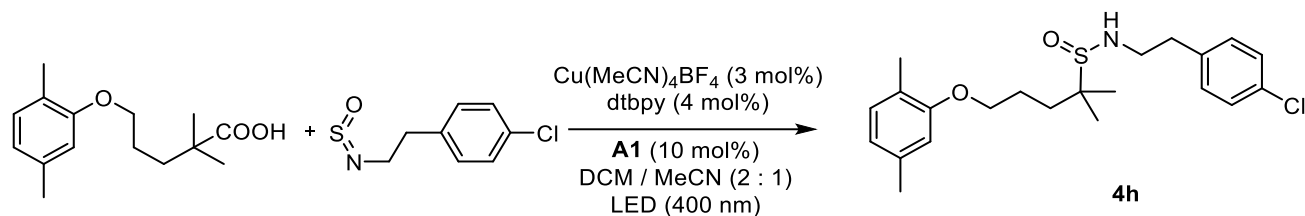

According to GP2, the reaction was carried out with 5-(2,5-dimethylphenoxy)-2,2-dimethylpentanoic acid (50 mg, 0.2 mmol), ((4-chlorobenzyl)imino)-14-sulfanone (94 mg, 0.5 mmol, 2.5 equiv. prepared from 2-(4-chlorophenyl)ethylamine according to GP1), acridine A1 (5.8 mg, 0.03 mmol, 10 mol%), Cu(MeCN)<sub>4</sub>BF<sub>4</sub> (1.9 mg, 0.006 mmol, 3 mol%), dtbpy (2.2 mg, 0.008 mmol, 4 mol%) and DCM : MeCN (2 : 1, v/v, 2 mL). Argon was passed on the surface of the reaction for 10 seconds. The test-tube was capped and the reaction mixture was irradiated with LED light ( $\lambda = 400$  nm) while stirring at 25–27 °C for 16 h. For work-up, a saturated solution of EDTA (1.5 mL) was added, followed by DCM (5 mL). The reaction mixture was then extracted with DCM (3 × 5 mL). The organic phases were combined, dried over anhydrous Na<sub>2</sub>SO<sub>4</sub>, concentrated under reduced pressure and the remaining material was purified by flash chromatography on silica gel (EtOAc/hexane, 7 : 3 v/v) to give product 4h (70 mg, 86%) as a colorless liquid.

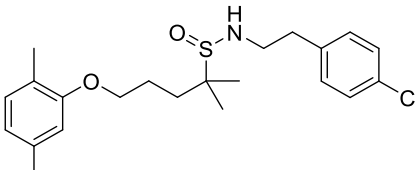

<sup>1</sup>H NMR (500 MHz, CDCl<sub>3</sub>): 7.28 (2 H, d, J = 8.3 Hz), 7.16 (2 H, d, J = 8.4 Hz), 7.04 (1 H, d, J = 7.4 Hz), 6.70 (1 H, d, J = 7.5 Hz), 6.64 (1 H, s), 3.94 (2 H, td, J = 6.0, 2.2 Hz), 3.55–3.44 (1 H, m), 3.40–3.26 (2 H, m), 2.95–2.83 (2 H, m), 2.34 (3 H, s), 2.20 (3 H, s), 1.96–1.76 (3 H, m), 1.65 (1 H, td, J = 12.3, 4.1 Hz), 1.22 (3 H, s), 1.19 (3 H, s) ppm. – <sup>13</sup>C NMR (125 MHz, CDCl<sub>3</sub>): 156.8, 137.1, 136.6, 132.4, 130.38, 130.35, 128.7, 123.5, 120.9, 112.0, 67.7, 58.7, 47.0, 36.8, 33.0, 23.9, 21.5, 19.9, 19.3, 15.8 ppm. – IR: 3818, 3647, 3360, 3051, 2950, 1722, 1656, 1620, 1497, 1264, 1028, 736 cm<sup>-1</sup>. – HRMS: calcd for C<sub>22</sub>H<sub>30</sub>ClNO<sub>2</sub>S: 408.1759, found 408.1752[M+H<sup>+</sup>].

### N-(1-Phenylethyl)pentadecane-7-sulfinamide (4i)

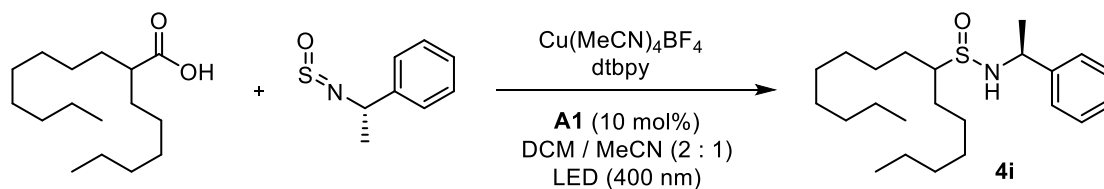

According to GP2, the reaction was carried out with 2-hexyldecanoic acid (51 mg, 0.2 mmol), ((1-phenylethyl)imino)-14-sulfanone (84 mg, 0.5 mmol, 2.5 equiv. prepared from (*S*)- $\alpha$ -methylbenzylamine, according to GP1), acridine **A1** (5.8 mg, 0.03 mmol, 10 mol%),  $\text{Cu}(\text{MeCN})_4\text{BF}_4$  (1.9 mg, 0.006 mmol, 3 mol%), dtbpy (2.2 mg, 0.008 mmol, 4 mol%) and DCM : MeCN (2 : 1, v/v, 2 mL). Argon was passed on the surface of the reaction for 10 seconds. The test-tube was capped and the reaction mixture was irradiated with LED light ( $\lambda = 400 \text{ nm}$ ) while stirring at 25–27 °C for 16 h. For work-up, a saturated solution of EDTA (1.5 mL) was added, followed by DCM (5 mL). The reaction mixture was then extracted with DCM (3  $\times$  5 mL). The organic phases were combined, dried over anhydrous  $\text{Na}_2\text{SO}_4$ , concentrated under reduced pressure and the remaining material was purified by flash chromatography on silica gel (EtOAc/hexane, 2.5 : 7.5 v/v) to give product **4i** as a 1 : 1 mixture of diastereomers (70 mg, 92%, 1 : 1 dr) as a colorless liquid.

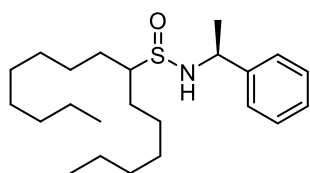

**4i-1**:  $^1\text{H NMR}$  (500 MHz,  $\text{CDCl}_3$ ): 7.40–7.23 (5 H, m), 4.61 (1 H, qd,  $J = 6.6, 2.8 \text{ Hz}$ ), 3.71 (1 H, d,  $J = 3.0 \text{ Hz}$ ), 2.54–2.46 (1 H, m), 1.92–1.21 (27 H, m), 0.90 (6 H, t,  $J = 6.8 \text{ Hz}$ ) ppm. –  $^{13}\text{C NMR}$  (125 MHz,  $\text{CDCl}_3$ ): 144.2, 128.8, 127.8, 126.6, 63.8, 52.9, 31.9, 31.6, 29.7, 29.4, 29.2, 27.9, 26.88, 26.85, 26.4, 26.3, 23.1, 22.7, 22.6, 14.12, 14.07 ppm. – IR: 2927, 2654, 1673, 1456, 1275, 1261, 763, 750  $\text{cm}^{-1}$ .

**4i-2**:  $^1\text{H NMR}$  (500 MHz,  $\text{CDCl}_3$ ): 7.40–7.26 (5 H, m), 4.61 (1 H, qd,  $J = 6.7, 3.5 \text{ Hz}$ ), 3.56 (1 H, d,  $J = 3.8 \text{ Hz}$ ), 2.52–2.43 (1 H, m), 1.95–1.81 (1 H, m), 1.75–1.20 (26 H, m), 0.97–0.86 (6 H, m) ppm. –  $^{13}\text{C NMR}$  (125 MHz,  $\text{CDCl}_3$ ): 143.5, 128.5, 127.5, 126.9, 64.5, 54.5, 31.9, 31.63, 31.60, 29.74, 29.71, 29.40, 29.36, 29.3, 28.0, 26.91, 26.87, 26.53, 26.48, 26.1, 25.1, 22.7, 22.6, 14.12, 14.07 ppm. – IR: 2924, 2853, 1672, 1490, 1448, 1376, 1264, 1059, 825, 738  $\text{cm}^{-1}$ . – HRMS: calcd for  $\text{C}_{23}\text{H}_{41}\text{NOS}$ : 402.2801, found 402.2808 [ $\text{M}+\text{Na}^+$ ].

### Nonane-1-sulfonamide (**6a**)

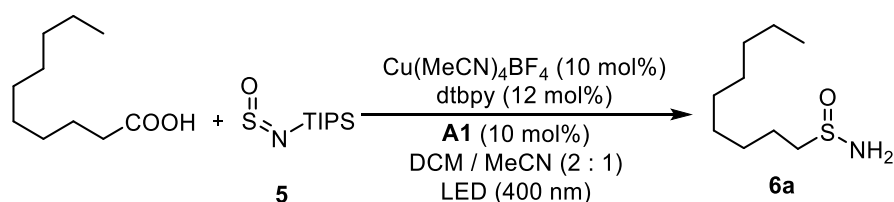

According to GP2, the reaction was carried out with decanoic acid (34 mg, 0.2 mmol), ((triisopropylsilyl)imino)-14-sulfanone (110 mg, 0.5 mmol, 2.5 equiv. prepared from triisopropylsilanamine according to the literature procedure<sup>4</sup>), acridine **A1** (5.8 mg, 0.03 mmol, 10 mol%),  $\text{Cu}(\text{MeCN})_4\text{BF}_4$  (6.28 mg, 0.020 mmol, 10 mol%), dtbpy (6.43 mg, 0.024 mmol, 12 mol%) and DCM : MeCN (2 : 1, v/v, 2 mL). Argon was passed on the surface of the reaction for 10 seconds. The test-tube was capped and the reaction mixture was irradiated with LED light ( $\lambda = 400 \text{ nm}$ ) while stirring at 25–27 °C for 16 h. After completion of the first step mixture was treated with tetrabutylammonium fluoride (1 mmol, 5 equiv.) and stirred for additional 4 h at room temperature. For work-up, a saturated solution of EDTA (1.5 mL) was added, followed by DCM (5 mL). The reaction mixture was then

extracted with DCM (3 × 5 mL). The organic phases were combined, dried over anhydrous Na<sub>2</sub>SO<sub>4</sub>, concentrated under reduced pressure and the remaining material was purified by flash chromatography on silica gel (EtOAc/hexane, 9 : 1 v/v) to give product **6a** (34 mg, 89%) as a colorless liquid.

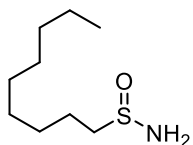

<sup>1</sup>H NMR (500 MHz, CDCl<sub>3</sub>): 4.08 (2 H, s), 2.83–2.68 (2 H, m), 1.80–1.66 (2 H, m), 1.54–1.18 (12 H, m), 0.90 (3 H, t, J = 6.8 Hz) ppm. – <sup>13</sup>C NMR (125 MHz, CDCl<sub>3</sub>): 57.7, 31.8, 29.3, 29.24, 29.20, 28.6, 22.8, 22.7, 14.1 ppm. – IR: 3352, 2924, 2856, 1603, 1462, 1206, 1194, 1152, 1067, 1014, 881 cm<sup>-1</sup>. – HRMS: calcd for C<sub>9</sub>H<sub>21</sub>NOS: 214.1236, found 214.1239

[M+Na<sup>+</sup>].

### 5-Chloropentane-1-sulfinamide (**6b**)

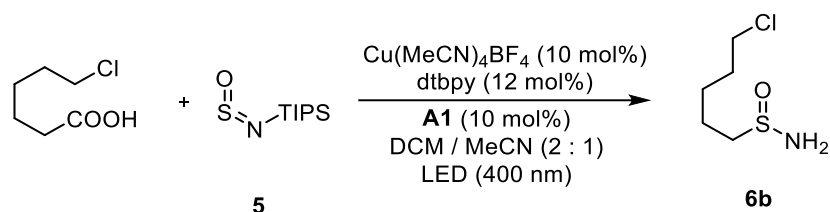

According to GP2, the reaction was carried out with 6-chlorohexanoic acid (30 mg, 0.2 mmol), ((triisopropylsilyl)imino)-14-sulfanone (110 mg, 0.5 mmol, 2.5 equiv. according to the literature procedure<sup>4</sup>), acridine **A1** (5.8 mg, 0.03 mmol, 10 mol%), Cu(MeCN)<sub>4</sub>BF<sub>4</sub> (6.28 mg, 0.020 mmol, 10 mol%), dtbpy (6.43 mg, 0.024 mmol, 12 mol%) and DCM : MeCN (2 : 1, v/v, 2 mL). Argon was passed on the surface of the reaction for 10 seconds. The test-tube was capped and the reaction mixture was irradiated with LED light (λ = 400 nm) while stirring at 25–27 °C for 16 h. After completion of the first step mixture was treated with tetrabutylammonium fluoride (1 mmol, 5 equiv.) and stirred for additional 4 h at room temperature. For work-up, a saturated solution of EDTA (1.5 mL) was added, followed by DCM (5 mL). The reaction mixture was then extracted with DCM (3 × 5 mL). The organic phases were combined, dried over anhydrous Na<sub>2</sub>SO<sub>4</sub>, concentrated under reduced pressure and the remaining material was purified by flash chromatography on silica gel (EtOAc/hexane, 9 : 1 v/v) to give product **6b** (30 mg, 88%) as a colorless liquid.

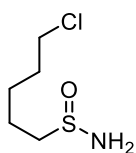

<sup>1</sup>H NMR (500 MHz, CDCl<sub>3</sub>): 4.24 (2 H, s), 3.57 (2 H, t, J = 6.5 Hz), 2.78 (2 H, tt, J = 13.2, 5.6 Hz), 1.91–1.70 (4 H, m), 1.67–1.49 (2 H, m) ppm. – <sup>13</sup>C NMR (125 MHz, CDCl<sub>3</sub>): 57.3, 44.6, 32.1, 25.9, 22.3 ppm. – IR: 3745, 3396, 2943, 2866, 2692, 2173, 1603, 1460, 1246, 1204, 1151, 1038, 941 cm<sup>-1</sup>. – HRMS: calcd for C<sub>5</sub>H<sub>12</sub>ClNOS: 192.0221, found 192.0220 [M+Na<sup>+</sup>].



### Cycloheptanesulfinamide (6c)

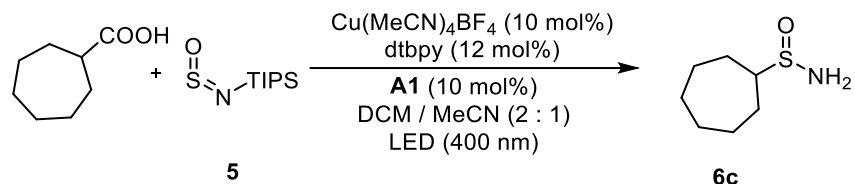

According to GP2, the reaction was carried out with cycloheptanecarboxylic acid (28 mg, 0.2 mmol), ((triisopropylsilyl)imino)-14-sulfanone (110 mg, 0.5 mmol, 2.5 equiv. prepared from triisopropylsilanamine according to the literature procedure<sup>4</sup>), acridine **A1** (5.8 mg, 0.03 mmol, 10 mol%), Cu(MeCN)<sub>4</sub>BF<sub>4</sub> (6.28 mg, 0.020 mmol, 10 mol%), dtbpy (6.43 mg, 0.024 mmol, 12 mol%) and DCM : MeCN (2 : 1, v/v, 2 mL). Argon was passed on the surface of the reaction for 10 seconds. The test-tube was capped and the reaction mixture was irradiated with LED light ( $\lambda = 400$  nm) while stirring at 25–27 °C for 16 h. After completion of the first step mixture was treated with tetrabutylammonium fluoride (1 mmol, 5 equiv.) and stirred for additional 4 h at room temperature. For work-up, a saturated solution of EDTA (1.5 mL) was added, followed by DCM (5 mL). The reaction mixture was then extracted with DCM (3 × 5 mL). The organic phases were combined, dried over anhydrous Na<sub>2</sub>SO<sub>4</sub>, concentrated under reduced pressure and the remaining material was purified by flash chromatography on silica gel (EtOAc/hexane, 10 : 0 v/v) to give product **6c** (26 mg, 80%) as a colorless liquid.

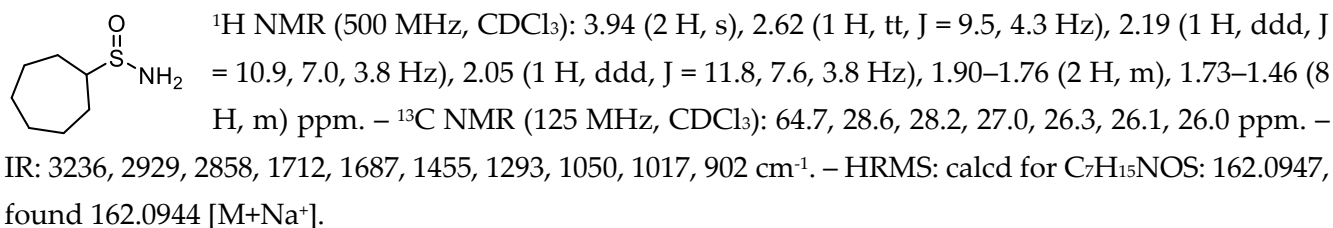

### (1S,3R,5S,7s)-4-Oxadamantane-1-sulfinamide (6d)

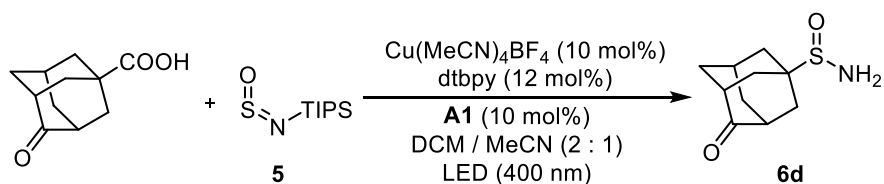

According to GP2, the reaction was carried out with (1s,3R,5S,7s)-4-oxadamantane-1-carboxylic acid (39 mg, 0.2 mmol), ((triisopropylsilyl)imino)-14-sulfanone (110 mg, 0.5 mmol, 2.5 equiv. prepared from triisopropylsilanamine according to the literature procedure<sup>4</sup>), acridine **A1** (5.8 mg, 0.03 mmol, 10 mol%), Cu(MeCN)<sub>4</sub>BF<sub>4</sub> (6.28 mg, 0.020 mmol, 10 mol%), dtbpy (6.43 mg, 0.024 mmol, 12 mol%) and DCM : MeCN (2 : 1, v/v, 2 mL). Argon was passed on the surface of the reaction for 10 seconds. The test-tube was capped and the reaction mixture was irradiated with LED light ( $\lambda = 400$  nm) while stirring at 25–27 °C for 16 h. After completion of the first step mixture was treated with tetrabutylammonium

fluoride (1 mmol, 5 equiv.) and stirred for additional 4 h at room temperature. For work-up, a saturated solution of EDTA (1.5 mL) was added, followed by DCM (5 mL). The reaction mixture was then extracted with DCM (3 × 5 mL). The organic phases were combined, dried over anhydrous Na<sub>2</sub>SO<sub>4</sub>, concentrated under reduced pressure and the remaining material was purified by flash chromatography on silica gel (MeOH/DCM, 1 : 12 v/v) to give product **6d** (29 mg, 68%) as a colorless liquid.

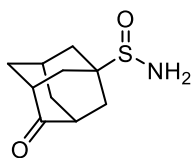

<sup>1</sup>H NMR (500 MHz, CDCl<sub>3</sub>): 3.99 (2 H, s), 2.75–2.68 (2 H, m), 2.39–2.34 (1 H, m), 2.24–2.01 (10 H, m) ppm. – <sup>13</sup>C NMR (125 MHz, CDCl<sub>3</sub>): 215.5, 56.0, 45.83, 45.78, 38.4, 38.3, 36.2, 35.4, 33.2, 27.8 ppm. – IR: 3407, 3205, 3089, 2961, 2870, 1723, 1593, 1248, 1030, 897 cm<sup>-1</sup>. – HRMS: calcd for C<sub>10</sub>H<sub>15</sub>NO<sub>2</sub>S: 236.0716, found 236.0714 [M+Na<sup>+</sup>].

### Methyl 4-(aminosulfinyl)bicyclo[2.2.2]octane-1-carboxylate (**6e**)

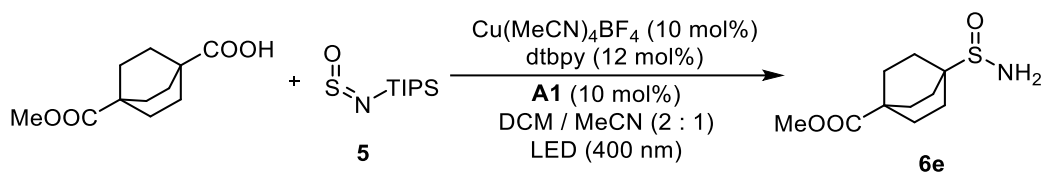

According to GP2, the reaction was carried out with 4-(methoxycarbonyl)bicyclo[2.2.2]octane-1-carboxylic acid (42 mg, 0.2 mmol), ((triisopropylsilyl)imino)-14-sulfanone (110 mg, 0.5 mmol, 2.5 equiv. prepared from triisopropylsilanamine according to the literature procedure<sup>4</sup>), acridine **A1** (5.8 mg, 0.03 mmol, 10 mol%), Cu(MeCN)<sub>4</sub>BF<sub>4</sub> (6.28 mg, 0.020 mmol, 10 mol%), dtbpy (6.43 mg, 0.024 mmol, 12 mol%) and DCM : MeCN (2 : 1, v/v, 2 mL). Argon was passed on the surface of the reaction for 10 seconds. The test-tube was capped and the reaction mixture was irradiated with LED light (λ = 400 nm) while stirring at 25–27 °C for 16 h. After completion of the first step mixture was treated with tetrabutylammonium fluoride (1 mmol, 5 equiv.) and stirred for additional 4 h at room temperature. For work-up, a saturated solution of EDTA (1.5 mL) was added, followed by DCM (5 mL). The reaction mixture was then extracted with DCM (3 × 5 mL). The organic phases were combined, dried over anhydrous Na<sub>2</sub>SO<sub>4</sub>, concentrated under reduced pressure and the remaining material was purified by flash chromatography on silica gel (EtOAc/hexane, 9 : 1 v/v) to give product **6e** (35 mg, 76%) as a colorless liquid.

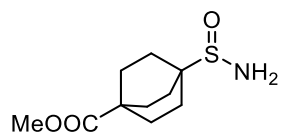

<sup>1</sup>H NMR (500 MHz, CDCl<sub>3</sub>): 3.78 (2 H, s), 3.68 (3 H, s), 2.01–1.71 (12 H, m) ppm. – <sup>13</sup>C NMR (125 MHz, CDCl<sub>3</sub>): 177.2, 56.2, 51.9, 39.0, 28.0, 23.5 ppm. – IR: 3222, 2921, 2866, 1614, 1508, 1468, 1284, 1264, 1129, 1034, 803 cm<sup>-1</sup>. – HRMS: calcd for C<sub>10</sub>H<sub>17</sub>NO<sub>3</sub>S: 232.1002, found 232.0996 [M+Na<sup>+</sup>].

### 5-(2,5-Dimethylphenoxy)-2-methylpentane-2-sulfinamide (6f)

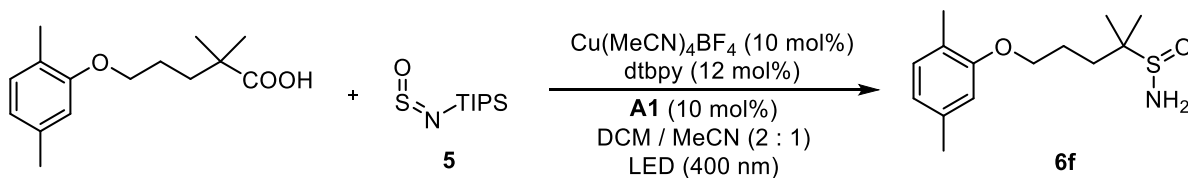

According to GP2, the reaction was carried out with 5-(2,5-dimethylphenoxy)-2,2-dimethylpentanoic acid (50 mg, 0.2 mmol), ((triisopropylsilyl)imino)-14-sulfanone (110 mg, 0.5 mmol, 2.5 equiv. prepared from triisopropylsilanamine according to the literature procedure<sup>4</sup>), acridine **A1** (5.8 mg, 0.03 mmol, 10 mol%), Cu(MeCN)<sub>4</sub>BF<sub>4</sub> (6.28 mg, 0.020 mmol, 10 mol%), dtbpy (6.43 mg, 0.024 mmol, 12 mol%) and DCM : MeCN (2 : 1, v/v, 2 mL). Argon was passed on the surface of the reaction for 10 seconds. The test-tube was capped and the reaction mixture was irradiated with LED light ( $\lambda = 400$  nm) while stirring at 25–27 °C for 16 h. After completion of the first step mixture was treated with tetrabutylammonium fluoride (1 mmol, 5 equiv.) and stirred for additional 4 h at room temperature. For work-up, a saturated solution of EDTA (1.5 mL) was added, followed by DCM (5 mL). The reaction mixture was then extracted with DCM (3 × 5 mL). The organic phases were combined, dried over anhydrous Na<sub>2</sub>SO<sub>4</sub>, concentrated under reduced pressure and the remaining material was purified by flash chromatography on silica gel (EtOAc/hexane, 7 : 3 v/v) to give product **6f** (40 mg, 74%) as a colorless liquid.

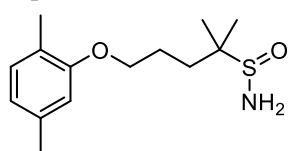

<sup>1</sup>H NMR (500 MHz, CDCl<sub>3</sub>): 7.03 (1 H, d, *J* = 7.4 Hz), 6.69 (1 H, d, *J* = 7.4 Hz), 6.63 (1 H, s), 4.05–3.92 (2 H, m), 3.88 (2 H, s), 2.33 (3 H, s), 2.20 (3 H, s), 2.04–1.64 (4 H, m), 1.27 (3 H, s), 1.25 (3 H, s) ppm. – <sup>13</sup>C NMR (125 MHz, CDCl<sub>3</sub>): 156.8, 136.5, 130.4, 123.6, 120.9, 112.0, 67.8, 58.2, 32.5, 23.9, 21.4, 19.2, 19.1, 15.8 ppm. –

IR: 3235, 2921, 2853, 1645, 1458, 1172, 1015, 885 cm<sup>-1</sup>. – HRMS: calcd for C<sub>14</sub>H<sub>23</sub>NO<sub>2</sub>S: 292.1342, found 292.1344 [M+Na<sup>+</sup>].

### 5-(2,5-Dimethylphenoxy)-2-methyl-N-phenylpentane-2-sulfinamide (7a)

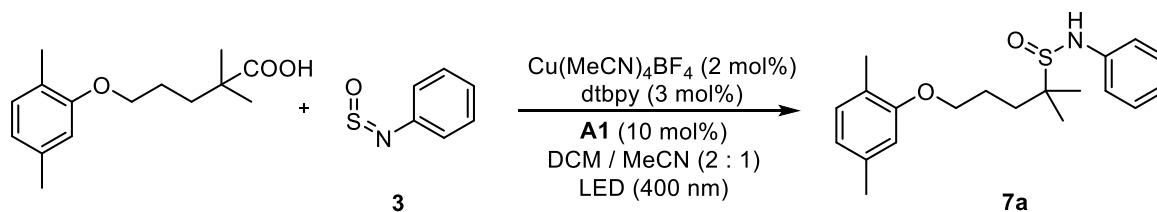

According to GP2, the reaction was carried out with 5-(2,5-dimethylphenoxy)-2,2-dimethylpentanoic acid (50 mg, 0.2 mmol), sulfanylamine **3** prepared from aniline according the GP1 (56 mg, 0.4 mmol, 2 equiv. prepared from triisopropylsilanamine according to the literature procedure<sup>4</sup>), acridine **A1** (5.8 mg, 0.03 mmol, 10 mol%), Cu(MeCN)<sub>4</sub>BF<sub>4</sub> (1.3 mg, 0.004 mmol, 2 mol%), dtbpy (1.6 mg, 0.006 mmol, 3 mol%) and DCM : MeCN (2 : 1, v/v, 2 mL). Argon was passed on the surface of the reaction for 10

seconds. The test-tube was capped and the reaction mixture was irradiated with LED light ( $\lambda = 400$  nm) while stirring at 25–27 °C for 16 h. After completion of the first step mixture was treated with tetrabutylammonium fluoride (1 mmol, 5 equiv.) and stirred for additional 4 h at room temperature. For work-up, a saturated solution of EDTA (1.5 mL) was added, followed by DCM (5 mL). The reaction mixture was then extracted with DCM (3 × 5 mL). The organic phases were combined, dried over anhydrous Na<sub>2</sub>SO<sub>4</sub>, concentrated under reduced pressure and the remaining material was purified by flash chromatography on silica gel (EtOAc/hexane, 3.5 : 6.5 v/v) to give product **7a** (69 mg, 99%) as a colorless liquid.

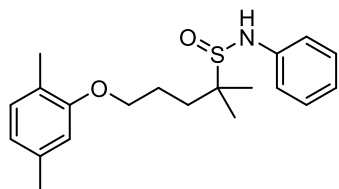

<sup>1</sup>H NMR (500 MHz, CDCl<sub>3</sub>): 7.33–7.25 (2 H, m), 7.09–6.98 (4 H, m), 6.71 (1 H, d, *J* = 7.4 Hz), 6.65 (1 H, s), 5.73 (1 H, s), 3.99 (2 H, dt, *J* = 4.0, 2.0 Hz), 2.35 (3 H, s), 2.20 (3 H, s), 2.07–1.78 (4 H, m), 1.39 (3 H, s), 1.37 (3 H, s) ppm. –  
<sup>13</sup>C NMR (125 MHz, CDCl<sub>3</sub>): 156.8, 142.1, 136.5, 130.4, 129.4, 123.6, 123.0, 120.9, 118.4, 112.0, 67.7, 59.5, 32.7, 23.9, 21.4, 19.7, 19.4, 15.8 ppm. – IR: 3167,

3044, 2920, 2865, 1598, 1507, 1495, 1444, 1384, 1338, 1128 cm<sup>-1</sup>. – HRMS: calcd for C<sub>20</sub>H<sub>27</sub>NO<sub>2</sub>S: 346.1835, found 346.1834 [M+H<sup>+</sup>].

**(E)-5-(4-Hydroxy-6-methoxy-7-methyl-3-oxo-1,3-dihydroisobenzofuran-5-yl)-3-methyl-N-phenylpent-3-ene-1-sulfonamide (7b)**

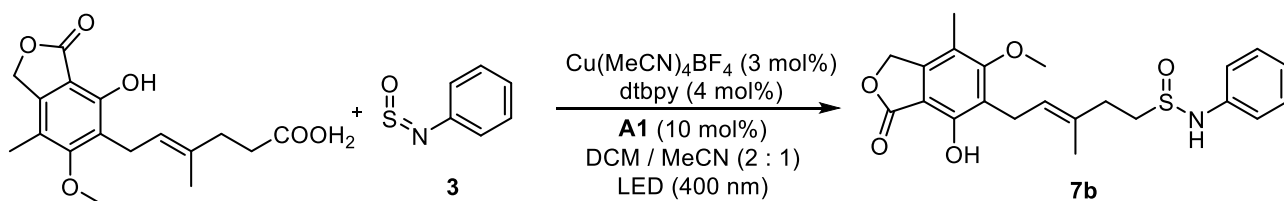

According to GP2, the reaction was carried out with (*E*)-6-(4-hydroxy-6-methoxy-7-methyl-3-oxo-1,3-dihydroisobenzofuran-5-yl)-4-methylhex-4-enoic acid (64 mg, 0.2 mmol), sulfanylamine **3** prepared from aniline according to the GP1 (56 mg, 0.4 mmol, 2 equiv. prepared from aniline according to the literature procedure<sup>4</sup>), acridine **A1** (5.8 mg, 0.03 mmol, 10 mol%), Cu(MeCN)<sub>4</sub>BF<sub>4</sub> (1.9 mg, 0.006 mmol, 3 mol%), dtbpy (2.2 mg, 0.008 mmol, 4 mol%) and DCM : MeCN (2 : 1, v/v, 2 mL). Argon was passed on the surface of the reaction for 10 seconds. The test-tube was capped and the reaction mixture was irradiated with LED light ( $\lambda = 400$  nm) while stirring at 25–27 °C for 16 h. For work-up, a saturated solution of EDTA (1.5 mL) was added, followed by DCM (5 mL). The reaction mixture was then extracted with DCM (3 × 5 mL). The organic phases were combined, dried over anhydrous Na<sub>2</sub>SO<sub>4</sub>, concentrated under reduced pressure and the remaining material was purified by flash chromatography on silica gel (EtOAc/hexane, 8 : 2 v/v) to give product **7b** (58 mg, 70%) as a colorless liquid.

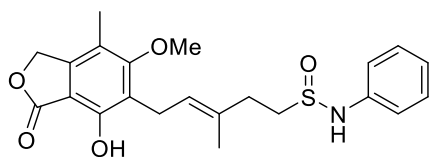

$^1\text{H}$  NMR (500 MHz,  $\text{CDCl}_3$ ): 7.72 (1 H, s), 7.21 (2 H, t,  $J = 7.9$  Hz), 7.02–6.94 (3 H, m), 6.82 (1 H, s), 5.40–5.32 (1 H, m), 5.21 (2 H, s), 3.77 (3 H, s), 3.42 (2 H, d,  $J = 7.1$  Hz), 3.21–2.99 (2 H, m), 2.54–2.36 (2 H, m), 2.16 (3 H, s), 1.85 (3 H, s) ppm. –  $^{13}\text{C}$  NMR (125 MHz,  $\text{CDCl}_3$ ):

172.9, 163.6, 153.6, 144.2, 141.2, 132.4, 129.4, 124.5, 123.1, 121.7, 118.5, 116.8, 106.4, 70.1, 61.0, 54.1, 32.8, 22.7, 16.2, 11.6 ppm. – IR: 3418, 2924, 1731, 1621, 1601, 1496, 1454, 1410, 1367 1328, 1193, 1135  $\text{cm}^{-1}$ . – HRMS: calcd for  $\text{C}_{22}\text{H}_{25}\text{NO}_5\text{S}$ : 416.1526, found 416.1527 [ $\text{M}+\text{H}^+$ ].

### Tert-butyl 2-((phenylamino)sulfinyl)pyrrolidine-1-carboxylate (**7c**)

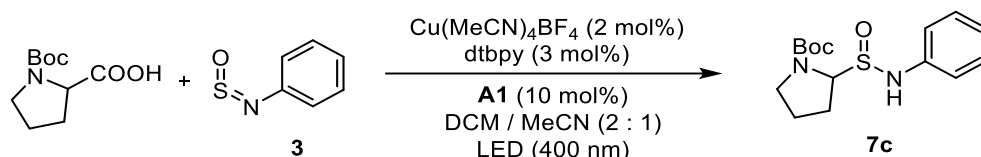

According to GP2, the reaction was carried out with (tert-butoxycarbonyl)proline (43 mg, 0.2 mmol), sulfinylamine **3** prepared from aniline according the GP1 (70 mg, 0.5 mmol, 2.5 equiv.), acridine **A1** (5.8 mg, 0.03 mmol, 10 mol%),  $\text{Cu}(\text{MeCN})_4\text{BF}_4$  (1.3 mg, 0.004 mmol, 2 mol%),  $\text{dtbpy}$  (1.6 mg, 0.006 mmol, 3 mol%) and  $\text{DCM} : \text{MeCN}$  (2 : 1, v/v, 2 mL). Argon was passed on the surface of the reaction for 10 seconds. The test-tube was capped and the reaction mixture was irradiated with LED light ( $\lambda = 400$  nm) while stirring at 25–27 °C for 16 h. For work-up, a saturated solution of EDTA (1.5 mL) was added, followed by  $\text{DCM}$  (5 mL). The reaction mixture was then extracted with  $\text{DCM}$  (3 × 5 mL). The organic phases were combined, dried over anhydrous  $\text{Na}_2\text{SO}_4$ , concentrated under reduced pressure and the remaining material was purified by flash chromatography on silica gel ( $\text{EtOAc}/\text{hexane}$ , 6 : 4 v/v) to give product **7c** (50 mg, 80%, 1 : 1 dr, **7c-1**/**7c-2**) as a colorless liquid.

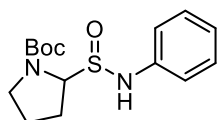

**7c-1**:  $^1\text{H}$  NMR (500 MHz,  $\text{CDCl}_3$ ): 7.33 (2 H, t,  $J = 7.7$  Hz), 7.13–7.04 (3 H, m), 3.67–3.28 (4 H, m), 2.41–1.92 (4 H, m), 1.45 (9 H, s) ppm. –  $^{13}\text{C}$  NMR (125 MHz,  $\text{CDCl}_3$ ): 142.0, 129.5, 123.0, 118.23, 118.18, 117.3, 79.0, 46.0, 44.9, 27.7, 27.6 ppm. – IR: 3355, 2973, 2928, 1689, 1618, 1511, 1455, 1394, 1365, 1255, 1166, 1116, 749  $\text{cm}^{-1}$ .

**7c-2**:  $^1\text{H}$  NMR (500 MHz,  $\text{CDCl}_3$ ): 7.38–7.28 (2 H, m), 7.16–7.02 (3 H, m, 3H), 3.85–3.77 (1 H, m), 3.63 (2 H, d,  $J = 8.0$  Hz), 3.52–3.34 (2 H, m), 2.32–2.08 (2 H, m), 2.02–1.93 (1 H, m), 1.47 (9 H, s) ppm. –  $^{13}\text{C}$  NMR (125 MHz,  $\text{CDCl}_3$ ): 142.1, 129.5, 122.9, 118.2, 117.3, 79.0, 45.6, 45.3, 44.8, 27.6, 25.7 ppm. – IR: 3362, 3225, 2956, 2210, 1722, 1628, 1604, 1515, 1317, 1172, 831  $\text{cm}^{-1}$ . – IR: 3355, 2974, 2930, 1676, 1604, 1499, 1456, 1401, 1365, 1256, 1167, 1119, 874, 750  $\text{cm}^{-1}$ .

### *tert*-Butyl (*tert*-butoxycarbonyl)((phenylamino)sulfinyl)alaninate (**7d**)

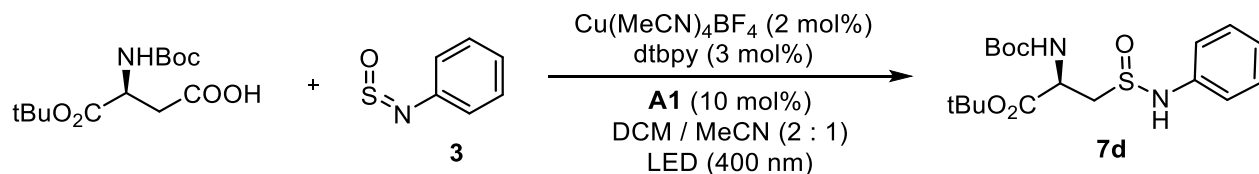

According to GP2, the reaction was carried out with 4-(*tert*-butoxy)-3-((*tert*-butoxycarbonyl)amino)-4-oxobutanoic acid (58 mg, 0.2 mmol), sulfinylamine **3** prepared from aniline according the GP1 (56 mg, 0.4 mmol, 2 equiv.), acridine **A1** (5.8 mg, 0.03 mmol, 10 mol%), Cu(MeCN)<sub>4</sub>BF<sub>4</sub> (1.3 mg, 0.004 mmol, 2 mol%), dtbpy (1.6 mg, 0.006 mmol, 3 mol%) and DCM : MeCN (2 : 1, v/v, 2 mL). Argon was passed on the surface of the reaction for 10 seconds. The test-tube was capped and the reaction mixture was irradiated with LED light ( $\lambda = 400 \text{ nm}$ ) while stirring at 25–27 °C for 16 h. For work-up, a saturated solution of EDTA (1.5 mL) was added, followed by DCM (5 mL). The reaction mixture was then extracted with DCM (3  $\times$  5 mL). The organic phases were combined, dried over anhydrous Na<sub>2</sub>SO<sub>4</sub>, concentrated under reduced pressure and the remaining material was purified by flash chromatography on silica gel (EtOAc/hexane, 3 : 7 v/v) to give product **7d** (39 mg, 51%, 1 : 1 dr) as a colorless solid.

M.p.: 73–75 °C. – <sup>1</sup>H NMR (500 MHz, CDCl<sub>3</sub>): 7.29 – 7.22 (2 H, m), 7.20 – 6.95 (4 H, m), 5.62 (1 H, dd, *J* = 15.6, 7.7 Hz), 4.74 – 4.51 (1 H, m), 3.71 – 3.28 (2 H, m), 1.48 (18 H, m) ppm. – <sup>13</sup>C NMR (125 MHz, CDCl<sub>3</sub>): <sup>13</sup>C NMR (126 MHz, CDCl<sub>3</sub>)  $\delta$  169.5, 169.4, 155.4, 129.5, 129.5, 123.7, 123.4, 119.4, 118.7, 83.4, 80.6, 57.1, 50.3, 49.9, 28.3, 27.9 ppm. – IR: 3346, 2977, 2931, 1731, 1697, 1600, 1522, 1496, 1392, 1367, 1354, 1246, 1150, 1031 cm<sup>-1</sup>. – HRMS: calcd for C<sub>18</sub>H<sub>28</sub>N<sub>2</sub>O<sub>5</sub>S: 385.1792, found 385.1793 [M+H<sup>+</sup>].

### 2-(4,5-Diphenyloxazol-2-yl)-*N*-phenylethane-1-sulfinamide (**7e**)

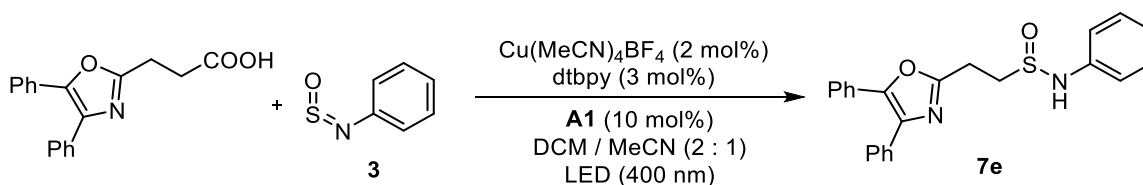

According to GP2, the reaction was carried out with 3-(4,5-diphenyloxazol-2-yl)propanoic acid (59 mg, 0.2 mmol), sulfinylamine **3** prepared from aniline according the GP1 (56 mg, 0.4 mmol, 2 equiv.), acridine **A1** (5.8 mg, 0.03 mmol, 10 mol%), Cu(MeCN)<sub>4</sub>BF<sub>4</sub> (1.3 mg, 0.004 mmol, 2 mol%), dtbpy (1.6 mg, 0.006 mmol, 3 mol%) and DCM : MeCN (2 : 1, v/v, 2 mL). Argon was passed on the surface of the reaction for 10 seconds. The test-tube was capped and the reaction mixture was irradiated with LED light ( $\lambda = 400 \text{ nm}$ ) while stirring at 25–27 °C for 16 h. For work-up, a saturated solution of EDTA (1.5 mL) was added, followed by DCM (5 mL). The reaction mixture was then extracted with DCM (3  $\times$  5 mL). The organic phases were combined, dried over anhydrous Na<sub>2</sub>SO<sub>4</sub>, concentrated under reduced

pressure and the remaining material was purified by flash chromatography on silica gel (EtOAc/hexane, 7 : 3 v/v) to give product **7e** (54 mg, 70%) as a colorless liquid.

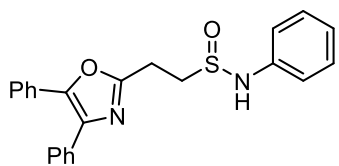

M.p.: 95–97°C. – <sup>1</sup>H NMR (500 MHz, CDCl<sub>3</sub>): 8.43 (1 H, s), 7.78–7.64 (2 H, m), 7.64–7.57 (2 H, m), 7.39 (6 H, dt, *J* = 14.4, 7.2 Hz), 7.24 (2 H, t, *J* = 7.8 Hz), 7.13–6.95 (3 H, m), 3.71–3.47 (3 H, m), 3.28 (1 H, dt, *J* = 16.8, 5.7 Hz) ppm. – <sup>13</sup>C NMR (125 MHz, CDCl<sub>3</sub>): 161.3, 146.1, 141.3, 134.9, 132.0, 129.5, 128.8,

128.74, 128.67, 128.5, 128.4, 127.9, 126.6, 123.0, 118.1, 45.0, 20.5 ppm. – IR: 3420, 1669, 1595, 1580, 1497, 1448, 1314, 1211, 1174, 1072, 1041, 964 cm<sup>-1</sup>. – HRMS: calcd for C<sub>23</sub>H<sub>20</sub>N<sub>2</sub>O<sub>2</sub>S: 389.1318, found 389.1318 [M+H<sup>+</sup>].

### 1-(11-Oxo-6,11-dihydrodibenzo[*b,e*]oxepin-2-yl)-*N*-phenylmethanesulfinamide (**7f**)

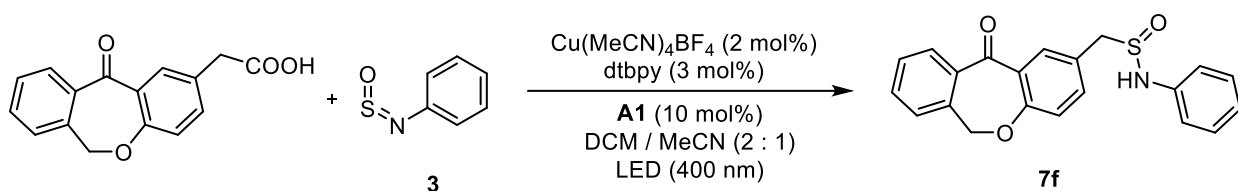

According to GP2, the reaction was carried out with 2-(11-oxo-6,11-dihydrodibenzo[*b,e*]oxepin-2-yl)acetic acid (54 mg, 0.2 mmol), sulfinylamine **3** prepared from aniline according the GP1 (56 mg, 0.4 mmol, 2 equiv.), acridine **A1** (5.8 mg, 0.03 mmol, 10 mol%), Cu(MeCN)<sub>4</sub>BF<sub>4</sub> (1.3 mg, 0.004 mmol, 2 mol%), dtbpy (1.6 mg, 0.006 mmol, 3 mol%) and DCM : MeCN (2 : 1, v/v, 2 mL). Argon was passed on the surface of the reaction for 10 seconds. The test-tube was capped and the reaction mixture was irradiated with LED light ( $\lambda = 400$  nm) while stirring at 25–27 °C for 16 h. For work-up, a saturated solution of EDTA (1.5 mL) was added, followed by DCM (5 mL). The reaction mixture was then extracted with DCM (3 × 5 mL). The organic phases were combined, dried over anhydrous Na<sub>2</sub>SO<sub>4</sub>, concentrated under reduced pressure and the remaining material was purified by flash chromatography on silica gel (EtOAc/hexane, 8 : 2 v/v) to give product **7f** (40 mg, 55%) as a colorless solid.

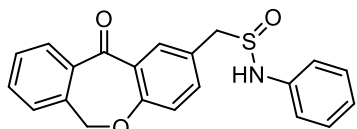

M.p.: 98–100 °C. – <sup>1</sup>H NMR (500 MHz, CDCl<sub>3</sub>): 8.23 (1 H, s), 7.92 (1 H, d, *J* = 7.7 Hz), 7.60 (1 H, t, *J* = 7.5 Hz), 7.55–7.48 (2 H, m), 7.40 (1 H, d, *J* = 7.5 Hz), 7.30–7.22 (2 H, m), 7.10 (1 H, dd, *J* = 8.4, 1.5 Hz), 7.04 (1 H, t, *J* = 7.4 Hz), 7.00 (1 H, d, *J* = 7.9 Hz), 6.13 (1 H, s), 5.23 (2 H, s), 4.31 (1 H, d, *J* = 13.1 Hz), 4.16 (1 H, d, *J* = 13.1 Hz) ppm. – <sup>13</sup>C NMR (125 MHz, CDCl<sub>3</sub>): 190.6, 161.5, 140.7, 140.3, 137.4, 135.4, 133.9, 133.0, 129.6, 129.5, 129.4,

127.9, 125.4, 123.6, 122.7, 121.7, 119.2, 73.7, 60.3 ppm. – IR: 2921, 2851, 1731, 1694, 1647, 1600, 1490, 1456, 1413, 1301, 1240, 1139 cm<sup>-1</sup>. – HRMS: calcd for C<sub>21</sub>H<sub>17</sub>NO<sub>3</sub>S: 364.1002, found 364.1000 [M+H<sup>+</sup>].

### (Z)-N-Phenylhenicos-12-ene-1-sulfinamide (7g)

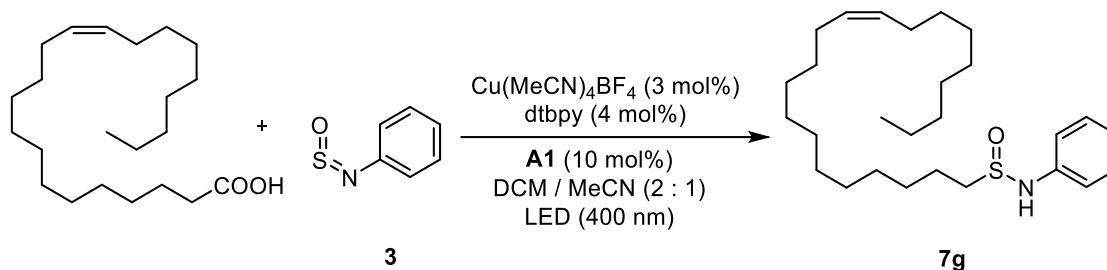

According to GP2, the reaction was carried out with (Z)-docos-13-enoic acid (68 mg, 0.2 mmol), sulfinylamine 3 prepared from aniline according the GP1 (56 mg, 0.4 mmol, 2 equiv.), acridine **A1** (5.8 mg, 0.03 mmol, 10 mol%), Cu(MeCN)<sub>4</sub>BF<sub>4</sub> (1.9 mg, 0.006 mmol, 3 mol%), dtbpy (2.2 mg, 0.008 mmol, 4 mol%) and DCM : MeCN (2 : 1, v/v, 2 mL). Argon was passed on the surface of the reaction for 10 seconds. The test-tube was capped and the reaction mixture was irradiated with LED light ( $\lambda = 400$  nm) while stirring at 25–27 °C for 16 h. For work-up, a saturated solution of EDTA (1.5 mL) was added, followed by DCM (5 mL). The reaction mixture was then extracted with DCM (3 × 5 mL). The organic phases were combined, dried over anhydrous Na<sub>2</sub>SO<sub>4</sub>, concentrated under reduced pressure and the remaining material was purified by flash chromatography on silica gel (EtOAc/hexane, 4 : 6 v/v) to give product **7g** (52 mg, 61%) as a colorless solid.

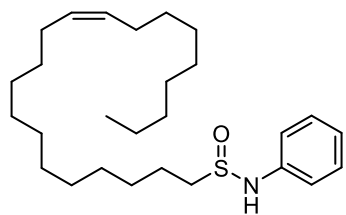

M.p.: 48–50 °C. – <sup>1</sup>H NMR (500 MHz, CDCl<sub>3</sub>): 7.27 (2 H, t, *J* = 8.0 Hz), 7.07 (2 H, d, *J* = 8.0 Hz), 7.03 (1 H, t, *J* = 7.4 Hz), 5.42–5.33 (2 H, m), 3.07–2.97 (2 H, m), 2.04 (4 H, q, *J* = 6.5 Hz), 1.74 (2 H, p, *J* = 7.7 Hz), 1.53–1.18 (28 H, m), 0.90 (3 H, t, *J* = 6.8 Hz) ppm. – <sup>13</sup>C NMR (125 MHz, CDCl<sub>3</sub>): 141.3, 129.93, 129.86, 129.5, 129.4, 123.1, 118.4, 55.9, 31.9, 29.8, 29.72, 29.67, 29.60, 29.55,

29.4, 29.33, 29.25, 28.6, 27.2, 23.3, 22.7, 14.1 ppm. – IR: 2918, 2849, 1601, 1498, 1466, 1036, 889 cm<sup>-1</sup>. – HRMS: calcd for C<sub>27</sub>H<sub>47</sub>NOS: 434.3451, found 434.3450 [M+H<sup>+</sup>].

### (8Z,11Z)-N-Phenylheptadeca-8,11-diene-1-sulfinamide (7h)

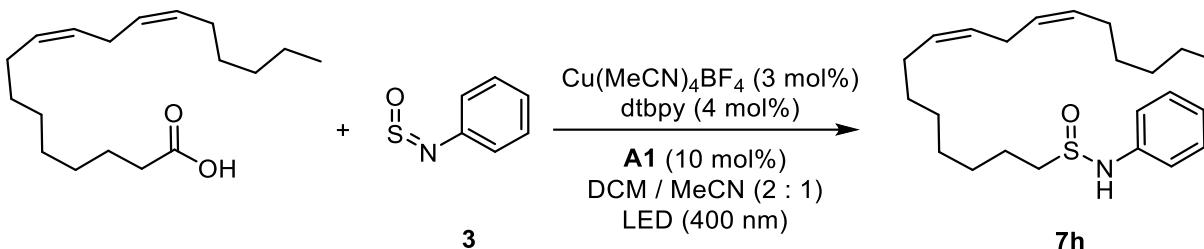

According to GP2, the reaction was carried out with (9Z,12Z)-octadeca-9,12-dienoic acid (56 mg, 0.2 mmol), sulfinylamine 3 prepared from aniline according the GP1 (56 mg, 0.4 mmol, 2 equiv.), acridine **A1** (5.8 mg, 0.03 mmol, 10 mol%), Cu(MeCN)<sub>4</sub>BF<sub>4</sub> (1.9 mg, 0.006 mmol, 3 mol%), dtbpy (2.2 mg, 0.008 mmol, 4 mol%) and DCM : MeCN (2 : 1, v/v, 2 mL). Argon was passed on the surface of the reaction for 10 seconds. The test-tube was capped and the reaction mixture was irradiated with LED light ( $\lambda = 400$



nm) while stirring at 25–27 °C for 16 h. For work-up, a saturated solution of EDTA (1.5 mL) was added, followed by DCM (5 mL). The reaction mixture was then extracted with DCM (3 × 5 mL). The organic phases were combined, dried over anhydrous Na<sub>2</sub>SO<sub>4</sub>, concentrated under reduced pressure and the remaining material was purified by flash chromatography on silica gel (EtOAc/hexane, 4 : 6 v/v) to give product **7h** (42 mg, 56%) as a colorless liquid.

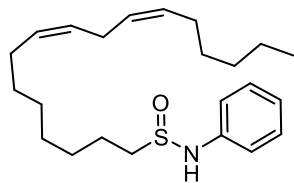

<sup>1</sup>H NMR (500 MHz, CDCl<sub>3</sub>): 7.26 (2 H, t, *J* = 7.9 Hz), 7.12–6.98 (4 H, m), 5.38 (4 H, qd, *J* = 10.7, 5.3 Hz), 3.00 (2 H, dq, *J* = 9.5, 4.6 Hz), 2.80 (2 H, t, *J* = 6.6 Hz), 2.07 (4 H, q, *J* = 7.0 Hz), 1.74 (2 H, p, *J* = 7.6 Hz), 1.52–1.20 (14 H, m), 0.91 (3 H, t, *J* = 6.8 Hz) ppm. – <sup>13</sup>C NMR (125 MHz, CDCl<sub>3</sub>): 141.4, 130.3, 129.9, 129.4, 128.2, 127.9, 123.0, 118.3, 55.9, 31.5, 29.5, 29.4, 29.2, 29.0, 28.6, 27.22, 27.17, 25.7, 23.3, 22.6, 14.1 ppm. – IR: 2924, 2854, 1600, 1497, 1464, 1040, 889 cm<sup>-1</sup>. – HRMS: calcd for C<sub>23</sub>H<sub>37</sub>NOS: 398.2488, found 398.2490 [M+Na<sup>+</sup>].

### N-Phenyltetracos-9,11-diyne-1-sulfonamide (**7i**)

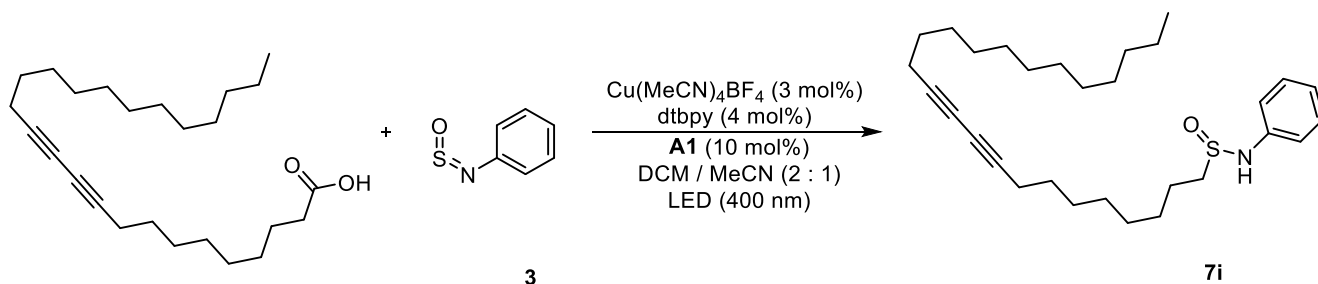

According to GP2, the reaction was carried out with pentacos-10,12-diyne-1-carboxylic acid (75 mg, 0.2 mmol), sulfanylamine **3** prepared from aniline according to GP1 (56 mg, 0.4 mmol, 2 equiv.), acridine **A1** (5.8 mg, 0.03 mmol, 10 mol%), Cu(MeCN)<sub>4</sub>BF<sub>4</sub> (1.9 mg, 0.006 mmol, 3 mol%), dtbpy (2.2 mg, 0.008 mmol, 4 mol%) and DCM : MeCN (2 : 1, v/v, 2 mL). Argon was passed on the surface of the reaction for 10 seconds. The test-tube was capped and the reaction mixture was irradiated with LED light (λ = 400 nm) while stirring at 25–27 °C for 16 h. For work-up, a saturated solution of EDTA (1.5 mL) was added, followed by DCM (5 mL). The reaction mixture was then extracted with DCM (3 × 5 mL). The organic phases were combined, dried over anhydrous Na<sub>2</sub>SO<sub>4</sub>, concentrated under reduced pressure and the remaining material was purified by flash chromatography on silica gel (EtOAc/hexane, 4 : 6 v/v) to give product **7i** (65 mg, 69%) as a colorless solid.

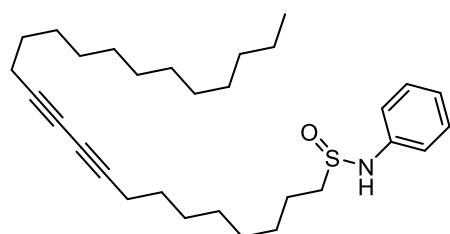

M.p.: 45–47 °C. – <sup>1</sup>H NMR (500 MHz, CDCl<sub>3</sub>): 7.37–7.27 (3 H, m), 7.08 (2 H, d, *J* = 7.9 Hz), 6.25 (1 H, s), 2.97 (2 H, hept, *J* = 6.5 Hz), 2.26 (4 H, t, *J* = 7.5 Hz), 1.77 (2 H, p, *J* = 7.6 Hz), 1.62–1.17 (30 H, m), 0.90 (3 H, t, *J* = 6.8 Hz) ppm. – <sup>13</sup>C NMR (125 MHz, CDCl<sub>3</sub>): 141.0, 129.5, 123.4, 118.8, 77.7, 77.4, 65.4, 65.2, 56.2, 31.9, 29.7, 29.6, 29.5, 29.4, 29.11, 29.05, 28.9, 28.8, 28.7, 28.6, 28.4, 28.2, 23.1, 22.7, 19.22, 19.18, 14.1 ppm. – IR: 2917, 2848, 1738,

1601, 1498, 1466, 1294, 1224, 1138, 1080, 1037  $\text{cm}^{-1}$ . – HRMS: calcd for  $\text{C}_{30}\text{H}_{47}\text{NO}_2$ : 470.3451, found 470.3450  $[\text{M}+\text{H}^+]$ .

**1-((1S,3R)-3-Acetyl-2,2-dimethylcyclobutyl)-N-phenylmethanesulfonamide (7j)**

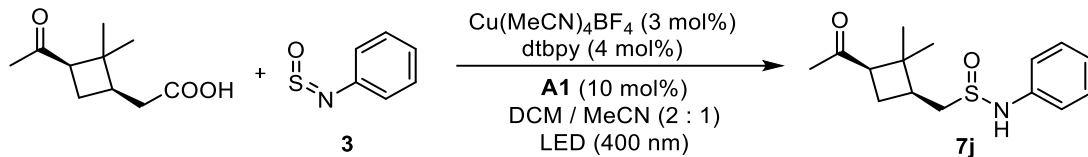

According to GP2, the reaction was carried out with *cis*-pinonic acid (37 mg, 0.2 mmol), sulfanylamine 3 prepared from aniline according the GP1 (70 mg, 0.5 mmol, 2.5 equiv.), acridine **A1** (5.8 mg, 0.03 mmol, 10 mol%),  $\text{Cu}(\text{MeCN})_4\text{BF}_4$  (1.9 mg, 0.006 mmol, 3 mol%), dtbpy (2.2 mg, 0.008 mmol, 4 mol%) and DCM : MeCN (2 : 1, v/v, 2 mL). Argon was passed on the surface of the reaction for 10 seconds. The test-tube was capped and the reaction mixture was irradiated with LED light ( $\lambda = 400 \text{ nm}$ ) while stirring at 25–27 °C for 16 h. For work-up, a saturated solution of EDTA (1.5 mL) was added, followed by DCM (5 mL). The reaction mixture was then extracted with DCM (3 × 5 mL). The organic phases were combined, dried over anhydrous  $\text{Na}_2\text{SO}_4$ , concentrated under reduced pressure and the remaining material was purified by flash chromatography on silica gel (EtOAc/hexane, 7 : 3 v/v) to give product **7j** (49 mg, 88%, 1 : 1 dr) as a colorless liquid.

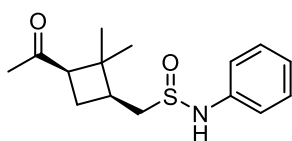

$^1\text{H}$  NMR (500 MHz,  $\text{CDCl}_3$ ): 7.25 (4 H, t,  $J = 7.7 \text{ Hz}$ ), 7.13–6.98 (6 H, m), 3.10–2.84 (8 H, m), 2.49–2.34 (2 H, m), 2.23–2.10 (2 H, m), 2.06 (3 H, s), 2.06 (3 H, s), 2.04–1.90 (2 H, m), 1.37 (3 H, s), 1.30 (3 H, s), 0.94 (3 H, s), 0.92 (3 H, s) ppm. –  $^{13}\text{C}$  NMR (125 MHz,  $\text{CDCl}_3$ ): 207.1, 207.0, 141.2, 129.5, 123.1, 118.3, 118.2, 57.2,

56.7, 54.1, 54.0, 43.6, 43.5, 36.4, 36.0, 30.3, 30.2, 30.1, 29.7, 23.0, 22.8, 17.8, 17.7 ppm. – IR: 3378, 3182, 2955, 1698, 1600, 1497, 1369, 1225, 1182, 1024, 750  $\text{cm}^{-1}$ . – HRMS: calcd for  $\text{C}_{15}\text{H}_{21}\text{NO}_2\text{S}$ : 280.1366, found 280.1362  $[\text{M}+\text{H}^+]$ .

**(6aS,6bR,8aR,10S,12aR,12bR,14bS)-10-hydroxy-2,2,6a,6b,9,9,12a-heptamethyl-N-phenyl-1,3,4,5,6,6a,6b,7,8,8a,9,10,11,12,12a,12b,13,14b-octadecahydricene-4a(2H)-sulfonamide (7k)**

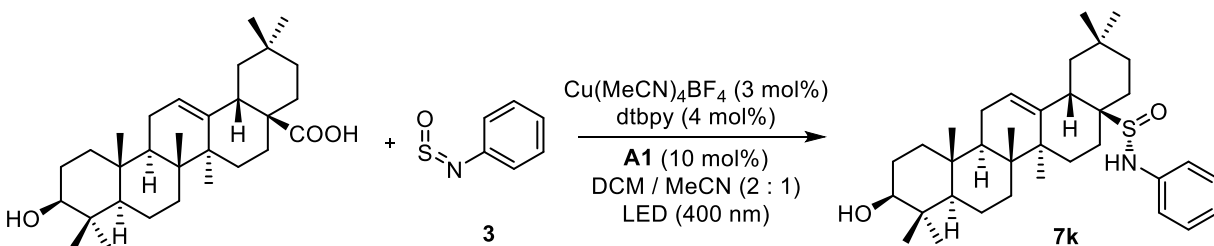

According to GP2, the reaction was carried out with oleanolic acid (91 mg, 0.2 mmol), sulfanylamine 3 prepared from aniline according the GP1 (70 mg, 0.5 mmol, 2.5 equiv.), acridine **A1** (5.8 mg, 0.03 mmol,

10 mol%), Cu(MeCN)<sub>4</sub>BF<sub>4</sub> (1.9 mg, 0.006 mmol, 3 mol%), dtbpy (2.2 mg, 0.008 mmol, 4 mol%) and DCM : MeCN (2 : 1, v/v, 2 mL). Argon was passed on the surface of the reaction for 10 seconds. The test-tube was capped and the reaction mixture was irradiated with LED light ( $\lambda = 400$  nm) while stirring at 25–27 °C for 16 h. For work-up, a saturated solution of EDTA (1.5 mL) was added, followed by DCM (5 mL). The reaction mixture was then extracted with DCM (3 × 5 mL). The organic phases were combined, dried over anhydrous Na<sub>2</sub>SO<sub>4</sub>, concentrated under reduced pressure and the remaining material was purified by flash chromatography on silica gel (EtOAc/hexane, 3 : 7 v/v) to give product **7k** (71 mg, 65%) as a colorless solid.

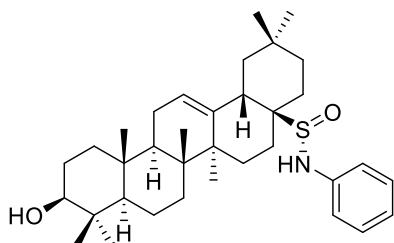

M.p.: 182–184°C. – <sup>1</sup>H NMR (500 MHz, CDCl<sub>3</sub>): 7.33 – 7.25 (2 H, m), 7.05–6.96 (3 H, m), 5.48 (1 H, t, J = 3.7 Hz), 5.42 (1 H, s), 3.24 (1 H, dd, J = 10.9, 5.0 Hz), 2.85 (1 H, dd, J = 13.6, 4.7 Hz), 2.45 (1 H, td, J = 12.5, 4.9 Hz), 2.29 (1 H, td, J = 14.4, 4.6 Hz), 2.10–1.88 (3 H, m), 1.81 (1 H, t, J = 13.5 Hz), 1.73–1.21 (18 H, m), 1.11 (4 H, m), 1.07–0.92 (13 H, m), 0.82 (3 H, s) ppm. – <sup>13</sup>C NMR (125 MHz, CDCl<sub>3</sub>): 13C NMR (126 MHz, CDCl<sub>3</sub>)

$\delta$  142.3, 140.8, 129.6, 125.4, 122.8, 118.0, 79.0, 64.7, 55.3, 47.6, 47.0, 41.7, 40.5, 40.2, 38.8, 38.6, 37.01, 36.98, 33.9, 33.0, 32.8, 30.9, 29.7, 28.1, 27.2, 25.7, 25.5, 23.7, 23.0, 20.1, 18.3, 17.3, 15.64, 15.56 ppm. – IR: 3361, 2943, 1599, 1495, 1366, 1276, 1029, 906, 875, 729 cm<sup>-1</sup>. – HRMS: calcd for C<sub>35</sub>H<sub>53</sub>NO<sub>2</sub>S: 574.3689, found 574.3695 [M+Na<sup>+</sup>].

**(3S,6aR,6bS,8aS,11S,12aS,14aR,14bS)-4,4,6a,6b,8a,11,14b-Heptamethyl-14-oxo-11-((phenylamino)sulfinyl)-1,2,3,4,4a,5,6,6a,6b,7,8,8a,9,10,11,12,12a,14,14a,14b-icosahydricen-3-yl acetate (7l)**

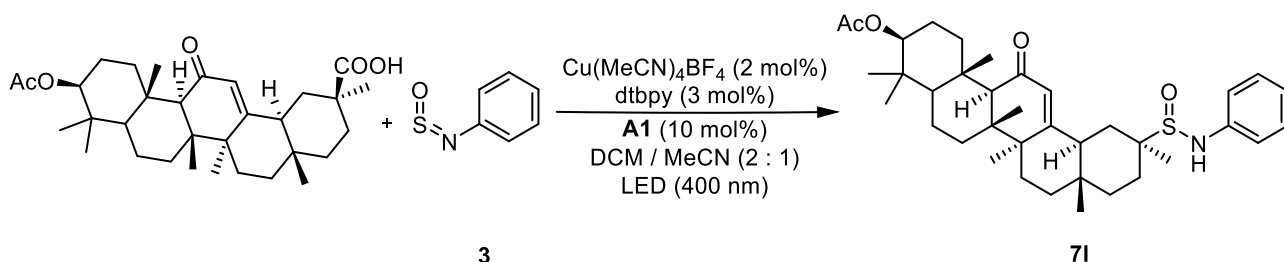

According to GP2, the reaction was carried out with glycyrrhetic acid (124 mg, 0.2 mmol), sulfinylamine **3** prepared from aniline according the GP1 (56 mg, 0.4 mmol, 2 equiv.), acridine **A1** (5.8 mg, 0.03 mmol, 10 mol%), Cu(MeCN)<sub>4</sub>BF<sub>4</sub> (1.3 mg, 0.004 mmol, 2 mol%), dtbpy (1.6 mg, 0.006 mmol, 3 mol%) and DCM : MeCN (2 : 1, v/v, 2 mL). Argon was passed on the surface of the reaction for 10 seconds. The test-tube was capped and the reaction mixture was irradiated with LED light ( $\lambda = 400$  nm) while stirring at 25–27 °C for 16 h. For work-up, a saturated solution of EDTA (1.5 mL) was added, followed by DCM (5 mL). The reaction mixture was then extracted with DCM (3 × 5 mL). The organic phases were combined, dried over anhydrous Na<sub>2</sub>SO<sub>4</sub>, concentrated under reduced pressure and the

remaining material was purified by flash chromatography on silica gel (EtOAc/hexane, 8 : 2 v/v) to give product **7l** (101 mg, 83%, 1 : 1 dr) as a colorless solid.

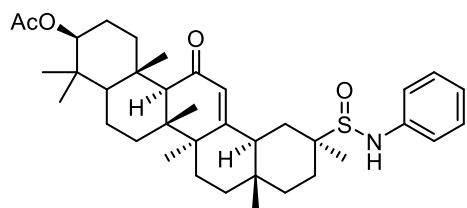

M.p.: 168–170 °C. – <sup>1</sup>H NMR (500 MHz, CDCl<sub>3</sub>): 7.35–7.23 (2 H, m), 7.11–6.97 (3 H, m), 5.77–5.36 (2 H, m), 4.57–4.47 (1 H, m), 2.84–2.72 (1 H, m), 2.61–0.74 (43 H, m) ppm. – <sup>13</sup>C NMR (125 MHz, CDCl<sub>3</sub>): 199.9, 199.83, 199.77, 199.6, 170.99, 170.96, 168.0, 167.7, 167.1, 142.0, 141.9, 129.7, 129.49, 129.46, 129.2, 128.9, 128.7, 123.5,

123.2, 123.1, 118.8, 118.7, 118.4, 118.2, 80.58, 80.55, 61.8, 61.73, 61.70, 60.83, 60.78, 60.2, 55.0, 54.9, 46.9, 46.6, 46.1, 45.5, 45.43, 45.39, 43.3, 43.2, 39.6, 39.1, 38.8, 38.74, 38.71, 38.0, 37.0, 36.9, 36.6, 35.7, 35.23, 35.18, 32.7, 32.6, 32.5, 32.3, 29.7, 29.5, 29.4, 28.2, 28.13, 28.06, 26.9, 26.7, 26.28, 26.25, 26.0, 24.3, 23.54, 23.50, 23.4, 21.3, 18.72, 18.67, 18.4, 18.3, 17.40, 17.36, 16.7, 16.41, 16.36, 14.3 ppm. – <sup>13</sup>C NMR (125 MHz, CDCl<sub>3</sub>): ppm. – IR: 2924, 2873, 1729, 1656, 1599, 1497, 1464, 1371, 1240, 1142, 1045, 1028, 1001, 985 cm<sup>-1</sup>. – HRMS: calcd for C<sub>37</sub>H<sub>53</sub>NO<sub>4</sub>S: 608.3768, found 608.3764 [M+H<sup>+</sup>].

**(3R)-3-((3R,7R,8R,9S,10S,13R,14S,17R)-3,7-Dihydroxy-10,13-dimethylhexadecahydro-1H-cyclopenta[a]phenanthren-17-yl)-N-phenylbutane-1-sulfinamide (7m)**

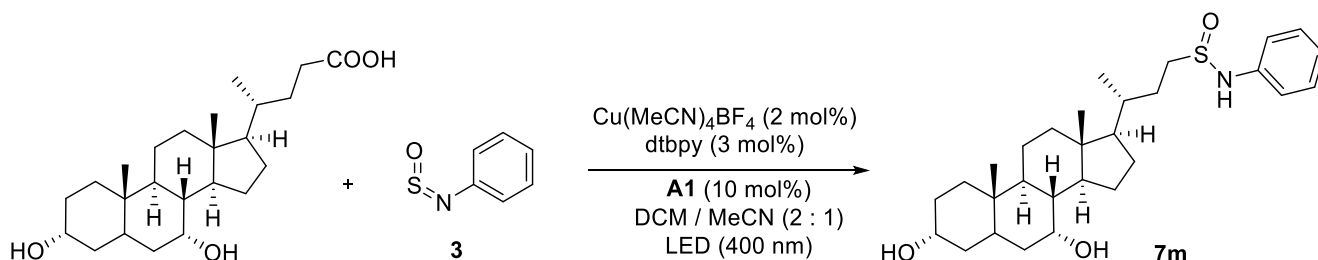

According to GP2, the reaction was carried out with chenodeoxycholic acid (78 mg, 0.2 mmol), sulfinylamine **3** prepared from aniline according the GP1 (56 mg, 0.4 mmol, 2 equiv.), acridine **A1** (5.8 mg, 0.03 mmol, 10 mol%), Cu(MeCN)<sub>4</sub>BF<sub>4</sub> (1.3 mg, 0.004 mmol, 2 mol%), dtbpy (1.6 mg, 0.006 mmol, 3 mol%) and DCM : MeCN (2 : 1, v/v, 2 mL). Argon was passed on the surface of the reaction for 10 seconds. The test-tube was capped and the reaction mixture was irradiated with LED light ( $\lambda = 400$  nm) while stirring at 25–27 °C for 16 h. For work-up, a saturated solution of EDTA (1.5 mL) was added, followed by DCM (5 mL). The reaction mixture was then extracted with DCM (3 × 5 mL). The organic phases were combined, dried over anhydrous Na<sub>2</sub>SO<sub>4</sub>, concentrated under reduced pressure and the remaining material was purified by flash chromatography on silica gel (EtOAc/hexane, 1 : 10 v/v) to give product **7m** (68 mg, 70%, 1 : 1 dr) as a colorless solid.

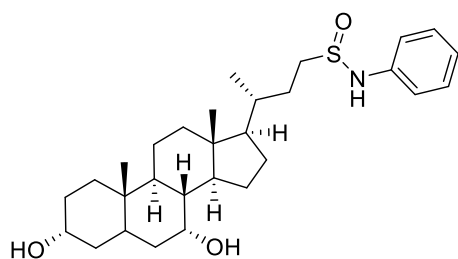

M.p.: 114–116 °C. – <sup>1</sup>H NMR (500 MHz, CDCl<sub>3</sub>): 7.30–6.98 (5 H, m), 3.84 (1 H, s), 3.46 (1 H, dq, *J* = 10.8, 5.2 Hz), 3.17–2.88 (2 H, m), 2.55 (2 H, s), 2.23 (1 H, q, *J* = 12.6 Hz), 2.04–1.08 (22 H, m), 1.05–0.84 (8 H, m), 0.67 (3 H, d, *J* = 5.6 Hz) ppm. – <sup>13</sup>C NMR (125 MHz, CDCl<sub>3</sub>): 141.44, 141.39, 129.4, 123.01, 122.96, 118.40, 118.36, 71.9, 68.4, 55.8, 55.6, 53.0, 52.9, 50.4, 50.3, 42.7, 41.5, 39.8, 39.7, 39.62, 39.58, 39.43, 39.40, 35.4, 35.2, 35.1, 35.0, 34.7, 34.6, 32.8, 31.6, 30.7, 30.6, 29.7, 29.3, 29.0, 28.3, 23.7, 22.8, 22.7, 20.6, 18.6, 18.5, 14.1, 11.8 ppm. – IR: 2926, 2864, 1600, 1497, 1465, 1375, 1227, 1077, 1038, 1000, 978, 906 cm<sup>-1</sup>. – HRMS: calcd for C<sub>35</sub>H<sub>53</sub>NO<sub>2</sub>S: 574.3689, found 574.3695 [M+Na<sup>+</sup>].

### 1-Cyclopropyl-*N*-phenylmethanesulfinamide (**9**) and *N*-phenylbut-3-ene-1-sulfinamide (**9a**)

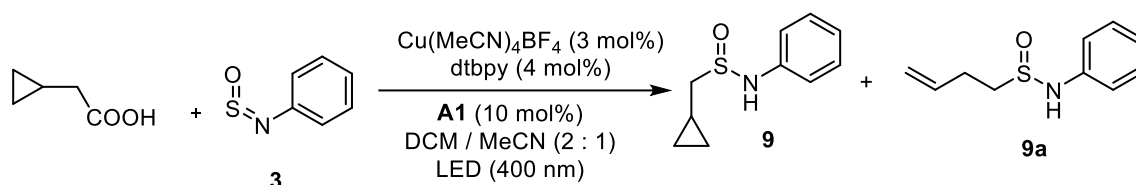

According to GP2, the reaction was carried out the reaction was carried out was followed with 2-cyclopropylacetic acid (20.0 mg, 0.2 mmol), sulfinylamine **3** (2, 2.5, 2.75, 3, 3.25, and 3.75 equiv.), acridine **A1** (5.8 mg, 0.03 mmol, 10 mol%), Cu(MeCN)<sub>4</sub>BF<sub>4</sub> (1.9 mg, 0.006 mmol, 3 mol%), dtbpy (2.2 mg, 0.008 mmol, 4 mol%) and dichloromethane : MeCN (2 : 1, v/v, 2 mL). Argon was passed on the surface of the reaction for 10 seconds. The test-tube was capped and the reaction mixture was irradiated with LED light ( $\lambda$  = 400 nm) while stirring at 25–27 °C for 8 h. For work-up, a saturated solution of EDTA (1.5 mL) was added, followed by dichloromethane (5 mL). The reaction mixture was then extracted with dichloromethane (3 × 5 mL). The organic phases were combined, dried over anhydrous Na<sub>2</sub>SO<sub>4</sub>, concentrated under reduced pressure and the remaining material was purified by flash chromatography on silica gel (EtOAc/hexane, 4 : 6 v/v) to give an inseparable mixture of products **9** and **9a** (17.7 mg, 45%) as a colorless liquid.

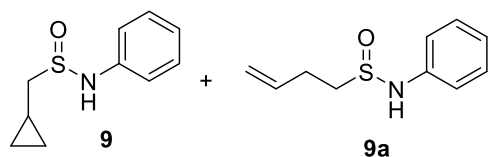

**9**: <sup>1</sup>H NMR (500 MHz, CDCl<sub>3</sub>)  $\delta$  7.36 (1 H brs), 7.26–7.22 (5 H m), 3.02 (1 H, dd, *J* = 13.4, 7.2 Hz), 2.90 (1 H, dd, *J* = 13.4, 7.6 Hz), 1.14–1.06 (1 H, m), 0.74–0.65 (2 H, m), 0.42 – 0.34 (2 H, m) ppm.  
**9a**: <sup>1</sup>H NMR (500 MHz, CDCl<sub>3</sub>)  $\delta$  7.43 (1 H, brs), 7.13 – 6.96 (5 H, m), 5.83 (1 H, ddt, *J* = 16.8, 10.2, 6.5 Hz), 5.29 – 5.03 (2 H, m), 3.11 (2 H, t, *J* = 7.5 Hz), 2.50 (2 H, dt, *J* = 8.8, 6.8 Hz) ppm. – <sup>13</sup>C NMR of **9** and **9a** mixture (125 MHz, CDCl<sub>3</sub>):  $\delta$  141.6, 141.4, 134.7, 129.4, 122.9, 122.9, 118.2, 118.2, 117.1, 61.1, 54.7, 27.6, 5.2, 4.8, 4.7 ppm. – IR: 3418, 3152, 3079, 2884, 1640, 1599, 1496, 1404, 1281, 1043, 886, 749 cm<sup>-1</sup>.

### *N*-(4-chlorophenethyl)-2-methylpropane-1-sulfinamide (**12a**)

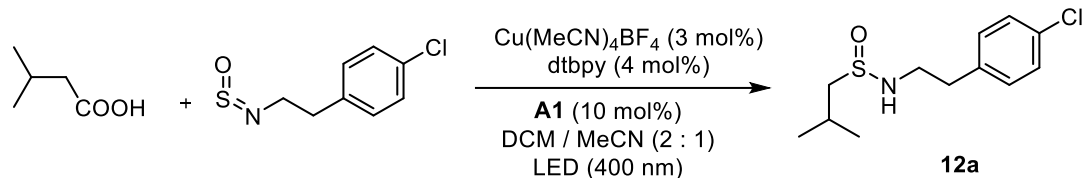

According to GP2, the reaction was carried out the reaction was carried out was followed with 3-methylbutanoic acid (20.4 mg, 0.2 mmol), ((4-chlorophenethyl)imino)- $\lambda^4$ -sulfanone (70 mg, 0.4 mmol, 2.0 equiv.) prepared from 2-(4-chlorophenyl)ethylamine according to GP1, acridine **A1** (5.8 mg, 0.03 mmol, 10 mol%),  $\text{Cu}(\text{MeCN})_4\text{BF}_4$  (1.9 mg, 0.006 mmol, 3 mol%), dtbpy (2.2 mg, 0.008 mmol, 4 mol%) and dichloromethane : MeCN (2 : 1, v/v, 2 mL). Argon was passed on the surface of the reaction for 10 seconds. The test-tube was capped and the reaction mixture was irradiated with LED light ( $\lambda = 400$  nm) while stirring at 25–27 °C for 14 h. For work-up, a saturated solution of EDTA (1.5 mL) was added, followed by dichloromethane (5 mL). The reaction mixture was then extracted with dichloromethane (3  $\times$  5 mL). The organic phases were combined, dried over anhydrous  $\text{Na}_2\text{SO}_4$ , concentrated under reduced pressure and the remaining material was purified by flash chromatography on silica gel (EtOAc/hexane, 4 : 6 v/v) to give product **12a** (38.4 mg, 74%) as a colorless liquid.

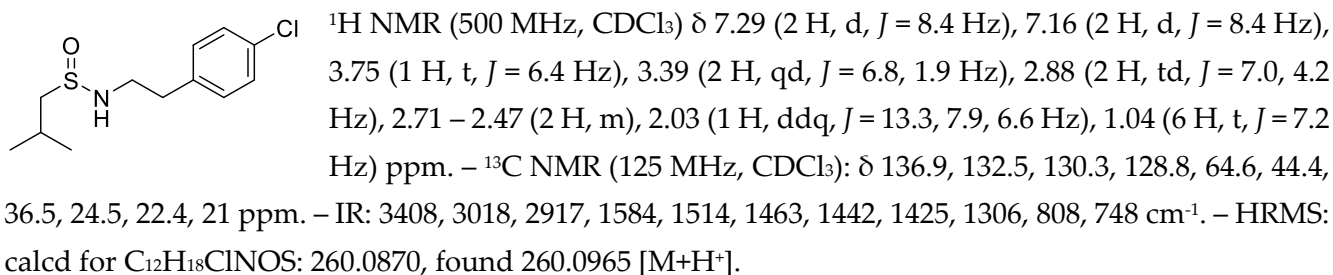

### *N*-(3,5-difluorophenyl)-2-methylpropane-1-sulfinamide (**12b**)

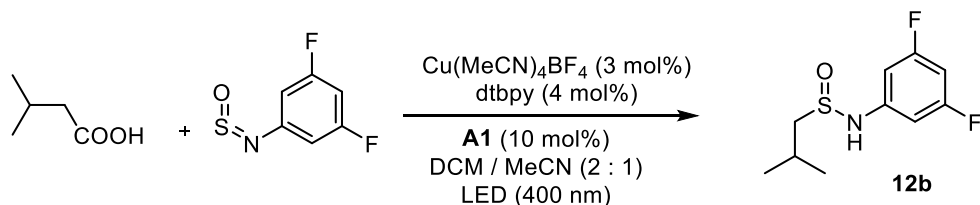

According to GP2, the reaction was carried out the reaction was carried out was followed with 3-methylbutanoic acid (20.4 mg, 0.2 mmol), ((3,5-difluorophenyl)imino)- $\lambda^4$ -sulfanone (70 mg, 0.4 mmol, 2.0 equiv.) prepared from 3,5-difluoroaniline according to GP1, acridine **A1** (5.8 mg, 0.03 mmol, 10 mol%),  $\text{Cu}(\text{MeCN})_4\text{BF}_4$  (1.9 mg, 0.006 mmol, 3 mol%), dtbpy (2.2 mg, 0.008 mmol, 4 mol%) and DCM : MeCN (2 : 1, v/v, 2 mL). Argon was passed on the surface of the reaction for 10 seconds. The test-tube was capped and the reaction mixture was irradiated with LED light ( $\lambda = 400$  nm) while stirring at 25–27 °C for 14 h. For work-up, a saturated solution of EDTA (1.5 mL) was added, followed by DCM

(5 mL). The reaction mixture was then extracted with DCM (3 × 5 mL). The organic phases were combined, dried over anhydrous Na<sub>2</sub>SO<sub>4</sub>, concentrated under reduced pressure and the remaining material was purified by flash chromatography on silica gel (EtOAc/hexane, 7 : 3 v/v) to give product **12b** (41 mg, 88%) as a colorless liquid.

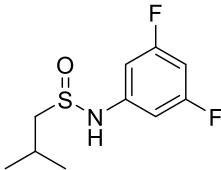 <sup>1</sup>H NMR (500 MHz, CDCl<sub>3</sub>) δ 8.10 (1 H, s), 6.54 (2 H, dd, *J* = 8.0, 2.2 Hz), 6.40 (1 H, tt, *J* = 9.1, 2.5 Hz), 3.00 (1 H, dd, *J* = 12.9, 6.2 Hz), 2.87 (1 H, dd, *J* = 12.9, 8.2 Hz), 2.14 (1 H, dp, *J* = 13.6, 6.8 Hz), 1.08 (6 H, dd, *J* = 30.1, 6.7 Hz) ppm. – <sup>13</sup>C NMR (125 MHz, CDCl<sub>3</sub>): δ 164.7 (d, *J* = 14.9 Hz), 162.7 (d, *J* = 14.9 Hz), 144.3 (t, *J* = 12.7 Hz), 100.2 (d, *J* = 29.4 Hz), 97.7 (t, *J* = 25.7 Hz), 64.3, 24.6, 22.2, 21.7 ppm. – <sup>19</sup>F NMR (471 MHz, CDCl<sub>3</sub>) δ -108.47 (t, *J* = 8.4 Hz). – IR: 3196, 2962, 2870, 1627, 1600, 1505, 1412, 1395, 1111, 1045, 1022, 991, 828, 802, 728 cm<sup>-1</sup>. – HRMS: calcd for C<sub>10</sub>H<sub>13</sub>F<sub>2</sub>NOS: 234.0759, found 234.0753 [M+H<sup>+</sup>].

### N-(4-fluorophenethyl)ethanesulfonamide (**12c**)

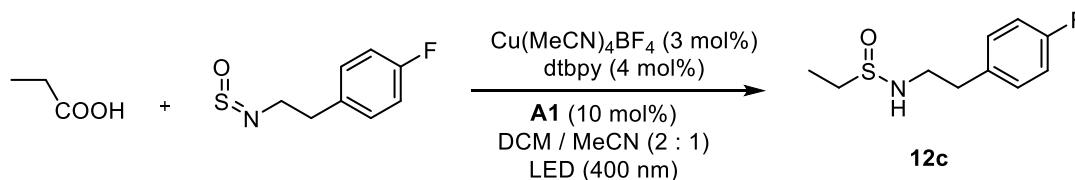

According to GP2, the reaction was carried out the reaction was carried out was followed with propionic acid (14.8 mg, 0.2 mmol), ((4-fluorophenethyl)imino)-λ<sup>4</sup>-sulfanone (74 mg, 0.4 mmol, 2.0 equiv.) prepared from 2-(4-fluorophenyl)ethylamine according to GP1, acridine **A1** (5.8 mg, 0.03 mmol, 10 mol%), Cu(MeCN)<sub>4</sub>BF<sub>4</sub> (1.9 mg, 0.006 mmol, 3 mol%), dtbpy (2.2 mg, 0.008 mmol, 4 mol%) and dichloromethane : MeCN (2 : 1, v/v, 2 mL). Argon was passed on the surface of the reaction for 10 seconds. The test-tube was capped and the reaction mixture was irradiated with LED light (λ = 400 nm) while stirring at 25–27 °C for 14 h. For work-up, a saturated solution of EDTA (1.5 mL) was added, followed by dichloromethane (5 mL). The reaction mixture was then extracted with dichloromethane (3 × 5 mL). The organic phases were combined, dried over anhydrous Na<sub>2</sub>SO<sub>4</sub>, concentrated under reduced pressure and the remaining material was purified by flash chromatography on silica gel (EtOAc/hexane, 4 : 6 v/v) to give product **12c** (30.1 mg, 70%) as a colorless liquid.

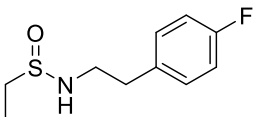 <sup>1</sup>H NMR (500 MHz, CDCl<sub>3</sub>) δ 7.19 (2 H, dd, *J* = 8.4, 5.5 Hz), 7.03–7.00 (2 H, m), 3.68 (1 H, brs), 3.39 (2 H, q, *J* = 6.8 Hz), 2.89 (2 H, td, *J* = 7.0, 5.0 Hz), 2.73 (2 H, qd, *J* = 7.5, 4.5 Hz), 1.22 (3 H, t, *J* = 7.5 Hz) ppm. – <sup>13</sup>C NMR (125 MHz, CDCl<sub>3</sub>): δ 162.7, 160.8, 134.1, 134.0, 130.3 (d, *J* = 8.0 Hz), 115.5 (d, *J* = 21.2 Hz), 49.1, 44.4, 36.4, 7.5 ppm. – <sup>19</sup>F NMR (471MHz, CDCl<sub>3</sub>): δ -116.4 ppm – IR: 3250, 3188, 2935, 1662, 1455, 1379, 1220, 1099, 1046, 900 cm<sup>-1</sup>.

### Methyl 3-((isobutylsulfinyl)amino)thiophene-2-carboxylate (**12d**)

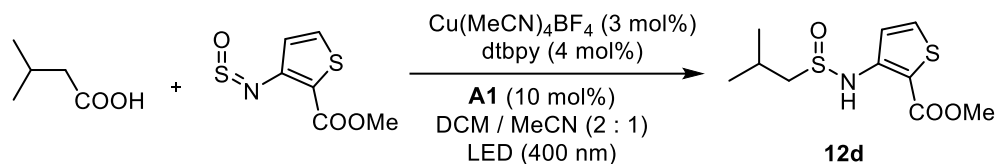

According to GP2, the reaction was carried out the reaction was carried out was followed with 3-methylbutanoic acid (20.4 mg, 0.2 mmol), methyl 3-((oxo- $\lambda^4$ -sulfaneylidene)amino)thiophene-2-carboxylate prepared from methyl 3-aminothiophene-2-carboxylate according to GP1 (81.2 mg, 0.4 mmol, 2.0 equiv.), acridine **A1** (5.8 mg, 0.03 mmol, 10 mol%),  $\text{Cu}(\text{MeCN})_4\text{BF}_4$  (1.9 mg, 0.006 mmol, 3 mol%), dtbpy (2.2 mg, 0.008 mmol, 4 mol%) and dichloromethane : MeCN (2 : 1, v/v, 2 mL). Argon was passed on the surface of the reaction for 10 seconds. The test-tube was capped and the reaction mixture was irradiated with LED light ( $\lambda = 400 \text{ nm}$ ) while stirring at 25–27 °C for 14 h. For work-up, a saturated solution of EDTA (1.5 mL) was added, followed by dichloromethane (5 mL). The reaction mixture was then extracted with dichloromethane (3  $\times$  5 mL). The organic phases were combined, dried over anhydrous  $\text{Na}_2\text{SO}_4$ , concentrated under reduced pressure and the remaining material was purified by flash chromatography on silica gel (EtOAc/hexane, 7 : 3 v/v) to give product **12d** (47 mg, 90%) as pale yellow liquid.

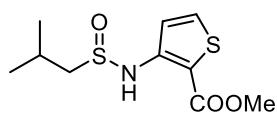

$^1\text{H NMR}$  (500 MHz,  $\text{CDCl}_3$ )  $\delta$  8.89 (1 H, brs), 7.46 (1 H, d,  $J = 5.4 \text{ Hz}$ ), 7.16 (1 H, d,  $J = 5.4 \text{ Hz}$ ), 3.87 (3 H, s), 2.97 – 2.87 (2 H, m), 2.27 – 2.16 (1 H, m), 1.13 (6 H, t,  $J = 7.1 \text{ Hz}$ ) ppm. –  $^{13}\text{C NMR}$  (125 MHz,  $\text{CDCl}_3$ ):  $\delta$  164.7, 148.8, 132.3, 118.3, 107.9,

65.4, 51.9, 24.4, 22.5, 21.9. ppm. – IR: 3364, 2558, 1679, 1609, 1542, 1456, 1308, 1272, 1191, 1086, 1038  $\text{cm}^{-1}$ . – HRMS: calcd for  $\text{C}_{10}\text{H}_{15}\text{NO}_3\text{S}_2$ : 262.0566, found 262.0565 [ $\text{M}+\text{H}^+$ ].

### *N*-(3-bromo-4-methylphenyl)ethanesulfonamide (**12e**)

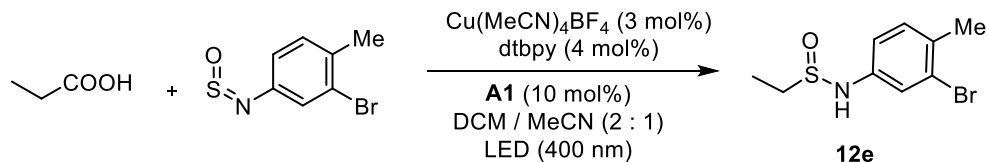

According to GP2, the reaction was carried out the reaction was carried out was followed with propionic acid (14.8 mg, 0.2 mmol), ((3-bromo-4-methylphenyl)imino)- $\lambda^4$ -sulfanone (92.4 mg, 0.4 mmol, 2.0 equiv.) prepared from 3-bromo-4-methylaniline according to GP1, acridine **A1** (5.8 mg, 0.03 mmol, 10 mol%),  $\text{Cu}(\text{MeCN})_4\text{BF}_4$  (1.9 mg, 0.006 mmol, 3 mol%), dtbpy (2.2 mg, 0.008 mmol, 4 mol%) and DCM : MeCN (2 : 1, v/v, 2 mL). Argon was passed on the surface of the reaction for 10 seconds. The test-tube was capped and the reaction mixture was irradiated with LED light ( $\lambda = 400 \text{ nm}$ ) while stirring at 25–27 °C for 14 h. For work-up, a saturated solution of EDTA (1.5 mL) was added, followed by DCM (5 mL). The reaction mixture was then extracted with DCM (3  $\times$  5 mL). The organic phases were combined, dried over anhydrous  $\text{Na}_2\text{SO}_4$ , concentrated under reduced pressure and the remaining



material was purified by flash chromatography on silica gel (EtOAc/hexane, 3 : 7 v/v) to give product **12e** (46 mg, 88%) as a colorless liquid.

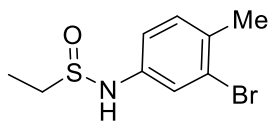

$^1\text{H}$  NMR (500 MHz,  $\text{CDCl}_3$ )  $\delta$  7.32 (1 H, s), 7.22 (1 H, d,  $J = 2.4$  Hz), 7.06 (1 H, d,  $J = 8.2$  Hz), 6.88 (1 H, dd,  $J = 8.1, 2.4$  Hz), 3.27 – 2.75 (2 H, m), 2.32 (3 H, s), 1.32 (3 H, t,  $J = 7.5$  Hz) ppm. –  $^{13}\text{C}$  NMR (125 MHz,  $\text{CDCl}_3$ ):  $\delta$  140.4, 132.2, 131.2, 125.2, 121.9, 117.1, 49.5, 22.0, 7.7 ppm. – IR: 3157, 2918, 1605, 1570, 1492, 1380, 1232,

1206, 1061, 1033, 907, 812, 764  $\text{cm}^{-1}$ .

## Computational data

### Software

Quantum chemical calculations were performed using the Lonestar6 supercomputer at the Texas Advanced Computing Center (TACC) hosted by the University of Texas in Austin, Texas, and Bridges-2 supercomputer hosted by the Pittsburgh Supercomputing Center (PSC) and supported by Advanced Cyberinfrastructure Coordination Ecosystem: Services & Support (ACCESS) program. DFT geometry optimization, vibrational frequency, and IRC calculations were conducted using Gaussian 16 (rA.03).<sup>[5]</sup> The CREST utility of the xTB software suite<sup>[6]</sup> was used to locate initial starting geometries for optimization via DFT. Energy decomposition analysis was performed using the Absolutely Localized Molecular Orbital Energy Decomposition Analysis (ALMO-EDA2) and Complementary Occupied-Virtual orbital Pairs (COVP) methods as implemented in Q-Chem 5.3.1.<sup>7</sup> Final images of minima and transition state structure geometries were rendered using CYLview (v1.0.600)<sup>[8]</sup> and VMD (v1.9.4a40).<sup>[9]</sup> Molecular orbital energies were obtained using Multiwfn 3.8(dev).<sup>10</sup> Routine visualization and monitoring of calculations was performed with Chemcraft (v1.8-622b).<sup>[11]</sup>

### Details of Computational Methods

#### Gaussian 16 DFT calculations

Geometries of ground state minima and transition state structures were optimized without constraints using MN15<sup>[12]</sup> density functional approximation and the def2-TZVP<sup>[13]</sup> basis set in dichloromethane solvent using the SMD solvation model.<sup>[14]</sup> Calculations were set to “tight” convergence criteria with an ultrafine grid. Frequency calculations at the same level of theory were used to confirm the nature of the isolated stationary points. Geometries with zero imaginary frequencies were deemed minima whereas those with exactly one imaginary frequency along the chemical path of interest were deemed transition state structures. Intrinsic reaction coordinate (IRC) calculations were performed to further corroborate that the located transition state structures connected reactants to products. The quasi-harmonic approximation at 1M concentration was applied via GoodVibes<sup>[15]</sup> to all structures to correct for potential errors associated with low magnitude vibrational frequencies using a cut-off frequency of 50 cm<sup>-1</sup>. Single point corrections of the above geometries were calculated using PW6B95<sup>[16]</sup>-D3(BJ)<sup>[17]</sup> in dichloromethane solvent with the SMD solvation model. The def2-TZVPPD<sup>[18]</sup> basis set was used by appending diffuse functions obtained from the EMSL BSE<sup>[19]</sup> to the G16-available def2-TZVPP basis set. This level of theory provided the final electronic component to the reported free energies.

#### Distortion/Interaction-Activation Strain Analysis of TS3

Distortion/interaction-activation strain analysis<sup>[20]</sup> was performed on **TSA** and **TSB** at the MN15 / def2-TZVP / SMD (DCM) level of theory. Guided by previous work with similar systems,<sup>[21]</sup> fragment

definitions were created for **TSA** and **TSB**, with the red fragment representing the alkyl radical component and the green fragment representing the sulfinylamine:

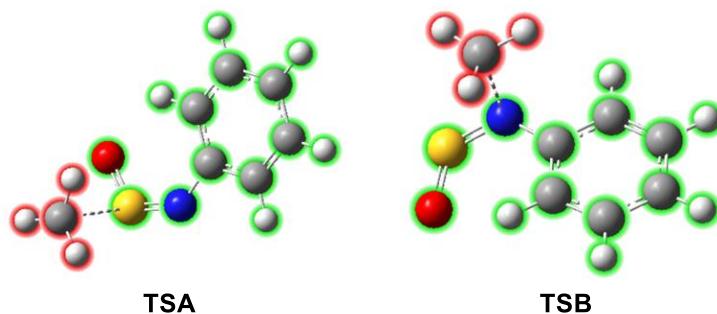

**Figure S2.** Division of **TSA** and **TSB** into fragments for distortion/interaction-activation strain analysis.

### Energy Decomposition Analysis

The second generation Absolutely Localized Molecular Orbital Energy Decomposition Analysis (ALMO-EDA2) method<sup>[22]</sup> was employed to gain quantitative insight into the intermolecular forces governing the interaction energy of **TSA** and **TSB**. The results of the ALMO-EDA2 studies are summarized in Table S2.

**Table S2.** Summary table for ALMO-EDA2.<sup>a</sup>

| Structure  | Prep | $\Delta E_{\text{Pauli}}$ | $\Delta E_{\text{Disp}}$ | $\Delta E_{\text{Elec}}$ | $\Delta E_{\text{CT}}$ | $\Delta E_{\text{Pol}}$ | $\Delta E_{\text{Sol}}$ | Total $\Delta E_{\text{int}}$ |
|------------|------|---------------------------|--------------------------|--------------------------|------------------------|-------------------------|-------------------------|-------------------------------|
| <b>TSA</b> | 0.0  | 29.3                      | -6.0                     | -14.3                    | -10.5                  | -1.2                    | -0.8                    | -3.6                          |
| <b>TSB</b> | 0.0  | 51.8                      | -10.2                    | -22.1                    | -14.3                  | -2.2                    | -1.0                    | 2.1                           |

<sup>a</sup>  $\Delta E$  reported in kcal, mol.

### Boltzmann Ensemble Averaging

To improve the accuracy of the DFT computational analysis of the reaction pathway, ensemble averaging was applied for the obtained structurally distinct conformers of intermediates **10** and **11**, as previously described.<sup>[23]</sup>

### Reaction efficiency prediction

#### Data collection

The reaction efficiency data were collected for reactions with carboxylic acids and sulfinylamines that were conducted as described in GP2, and the yields were determined using 1,4-dimethoxybenzene as an internal standard. The alkyl and sulfinylamine fragments and the normalized yields for the reactions between the corresponding carboxylic acids and sulfinylamines are reported in Table S3. All yields were z-score normalized as previously described.<sup>24</sup>

**Table S3.** Experimental reaction efficiency data for the decarboxylative sulfinamidation.

| Alkyl radical | Alkyl radical SMILES                                  | Sulfinylamine fragment | Sulfinylamine fragment SMILES             | Normalized yield <sup>a</sup> |
|---------------|-------------------------------------------------------|------------------------|-------------------------------------------|-------------------------------|
| a8            | <chem>CC[C]1COC1</chem>                               | b1                     | <chem>O=[S][N]C1=CC(N=CS2)=C2C=C1</chem>  | -0.71                         |
| a23           | <chem>[C]CCCCCCCC</chem>                              | b1                     | <chem>O=[S][N]C1=CC(N=CS2)=C2C=C1</chem>  | -0.50                         |
| a49           | <chem>[C]1CCOCC1</chem>                               | b1                     | <chem>O=[S][N]C1=CC(N=CS2)=C2C=C1</chem>  | -0.55                         |
| a2            | <chem>[C]1CCCCCCC1</chem>                             | b9                     | <chem>O=[S][N]CCC1=CC=C(Cl)C=C1</chem>    | 0.40                          |
| a34           | <chem>CCC[C]CCC</chem>                                | b9                     | <chem>O=[S][N]CCC1=CC=C(Cl)C=C1</chem>    | 0.71                          |
| a35           | <chem>CCCCC[C]CCCCCCCC</chem>                         | b9                     | <chem>O=[S][N]CCC1=CC=C(Cl)C=C1</chem>    | 0.61                          |
| a2            | <chem>[C]1CCCCCCC1</chem>                             | b10                    | <chem>O=[S][N]C1=C(F)C=C(F)C(F)=C1</chem> | 1.51                          |
| a21           | <chem>C[C]1COC1</chem>                                | b10                    | <chem>O=[S][N]C1=C(F)C=C(F)C(F)=C1</chem> | 0.56                          |
| a22           | <chem>C[C]1CCCC1</chem>                               | b10                    | <chem>O=[S][N]C1=C(F)C=C(F)C(F)=C1</chem> | 0.98                          |
| a26           | <chem>[C]CCNC(C)=O</chem>                             | b10                    | <chem>O=[S][N]C1=C(F)C=C(F)C(F)=C1</chem> | -0.82                         |
| a33           | <chem>[C]CCCCC/C=C\CCCCCCCC</chem>                    | b10                    | <chem>O=[S][N]C1=C(F)C=C(F)C(F)=C1</chem> | 0.03                          |
| a48           | <chem>CC(OC(N1CC[C]CC1)=O)(C)C</chem>                 | b10                    | <chem>O=[S][N]C1=C(F)C=C(F)C(F)=C1</chem> | 0.03                          |
| a49           | <chem>[C]1CCOCC2</chem>                               | b10                    | <chem>O=[S][N]C1=C(F)C=C(F)C(F)=C1</chem> | 1.19                          |
| a1            | <chem>[C]1CCCCC1</chem>                               | b11                    | <chem>O=[S][N]C1=CC=CN=C1</chem>          | 1.24                          |
| a14           | <chem>C[C]1CC(OC)(OC)C1</chem>                        | b11                    | <chem>O=[S][N]C1=CC=CN=C1</chem>          | 0.24                          |
| a4            | <chem>[C@H]1(C[C]2C3)C[C@@H](C2)C[C@@H]3C1</chem>     | b11                    | <chem>O=[S][N]C1=CC=CN=C1</chem>          | 0.19                          |
| a40           | <chem>[C][C@H]1C[C@@H](C(C)=O)C(C)1C</chem>           | b11                    | <chem>O=[S][N]C1=CC=CN=C1</chem>          | 0.45                          |
| a48           | <chem>CC(OC(N1CC[C]CC1)=O)(C)C</chem>                 | b11                    | <chem>O=[S][N]C1=CC=CN=C1</chem>          | -0.40                         |
| a17           | <chem>FC1(F)CC[C]CC1</chem>                           | b12                    | <chem>O=[S][N]C1=NC=C(Br)C=N1</chem>      | 0.29                          |
| a20           | <chem>[C]CCC(C1=CC=CC=C1)=O</chem>                    | b12                    | <chem>O=[S][N]C1=NC=C(Br)C=N1</chem>      | -0.92                         |
| a25           | <chem>[C]CCCCC1</chem>                                | b12                    | <chem>O=[S][N]C1=NC=C(Br)C=N1</chem>      | -0.03                         |
| a32           | <chem>[C]CCCB</chem>                                  | b12                    | <chem>O=[S][N]C1=NC=C(Br)C=N1</chem>      | -0.34                         |
| a51           | <chem>[C]C1=CC=C(I)C=C1</chem>                        | b12                    | <chem>O=[S][N]C1=NC=C(Br)C=N1</chem>      | -1.03                         |
| a52           | <chem>C[C]1CCC(CC1)=O</chem>                          | b12                    | <chem>O=[S][N]C1=NC=C(Br)C=N1</chem>      | -0.66                         |
| a1            | <chem>[C]1CCCCC1</chem>                               | b13                    | <chem>[NH][S]=O</chem>                    | -1.08                         |
| a9            | <chem>O=C1[C@H](C2)C[C@H]3C[C@@H]1C[C@@]2C3</chem>    | b13                    | <chem>[NH][S]=O</chem>                    | -0.13                         |
| a10           | <chem>C[C](C)CCCOC1=C(C)C=CC(C)=C1</chem>             | b13                    | <chem>[NH][S]=O</chem>                    | -0.03                         |
| a2            | <chem>[C]1CCCCC1</chem>                               | b13                    | <chem>[NH][S]=O</chem>                    | -0.34                         |
| a16           | <chem>O=C(C12CC[C](CC2)CC1)OC</chem>                  | b13                    | <chem>[NH][S]=O</chem>                    | -0.45                         |
| a23           | <chem>[C]CCCCCCCC</chem>                              | b13                    | <chem>[NH][S]=O</chem>                    | 0.98                          |
| a25           | <chem>[C]CCCCC1</chem>                                | b13                    | <chem>[NH][S]=O</chem>                    | 0.93                          |
| a34           | <chem>CCC[C]CCC</chem>                                | b13                    | <chem>[NH][S]=O</chem>                    | -0.29                         |
| a1            | <chem>[C]1CCCCC1</chem>                               | b14                    | <chem>O=[S][N]C1=CC=CC=C1</chem>          | 1.35                          |
| a10           | <chem>C[C](C)CCCOC1=C(C)C=CC(C)=C1</chem>             | b14                    | <chem>O=[S][N]C1=CC=CC=C1</chem>          | 1.51                          |
| a11           | <chem>O=C1C2=C(C=CC([C])=C2)OCC3=CC=CC=C31</chem>     | b14                    | <chem>O=[S][N]C1=CC=CC=C1</chem>          | -0.82                         |
| a12           | <chem>[C]CC1=CC=C(OC)C(OC)=C1</chem>                  | b14                    | <chem>O=[S][N]C1=CC=CC=C1</chem>          | -0.82                         |
| a2            | <chem>[C]1CCCCC1</chem>                               | b14                    | <chem>O=[S][N]C1=CC=CC=C1</chem>          | 1.51                          |
| a16           | <chem>O=C(C12CC[C](CC2)CC1)OC</chem>                  | b14                    | <chem>O=[S][N]C1=CC=CC=C1</chem>          | 1.24                          |
| a17           | <chem>FC1(F)CC[C]CC1</chem>                           | b14                    | <chem>O=[S][N]C1=CC=CC=C1</chem>          | 1.35                          |
| a20           | <chem>[C]CCC(C1=CC=CC=C1)=O</chem>                    | b14                    | <chem>O=[S][N]C1=CC=CC=C1</chem>          | -0.29                         |
| a23           | <chem>[C]CCCCCCCC</chem>                              | b14                    | <chem>O=[S][N]C1=CC=CC=C1</chem>          | 1.14                          |
| a25           | <chem>[C]CCCCC1</chem>                                | b14                    | <chem>O=[S][N]C1=CC=CC=C1</chem>          | 1.45                          |
| a26           | <chem>[C]CCNC(C)=O</chem>                             | b14                    | <chem>O=[S][N]C1=CC=CC=C1</chem>          | 0.03                          |
| a4            | <chem>[C@H]1(C[C]2C3)C[C@@H](C2)C[C@@H]3C1</chem>     | b14                    | <chem>O=[S][N]C1=CC=CC=C1</chem>          | 0.87                          |
| a29           | <chem>[C]CCCCC/C=C\C/C=C\CCCC</chem>                  | b14                    | <chem>O=[S][N]C1=CC=CC=C1</chem>          | -0.76                         |
| a30           | <chem>[C]C(NC(OC(C)(C)C)=O)C(OC(C)(C)C)=O</chem>      | b14                    | <chem>O=[S][N]C1=CC=CC=C1</chem>          | -1.03                         |
| a31           | <chem>[C]CCCCCCCCC/C=C\CCCCCCCC</chem>                | b14                    | <chem>O=[S][N]C1=CC=CC=C1</chem>          | -0.50                         |
| a36           | <chem>[C]CCCB</chem>                                  | b14                    | <chem>O=[S][N]C1=CC=CC=C1</chem>          | 0.29                          |
| a37           | <chem>[C]CC(NC(OC(C)(C)C)=O)C(OCC1=CC=CC=C1)=O</chem> | b14                    | <chem>O=[S][N]C1=CC=CC=C1</chem>          | -1.08                         |

|     |                                           |     |                                        |       |
|-----|-------------------------------------------|-----|----------------------------------------|-------|
| a39 | [C]CCC1=CC=CS1                            | b14 | O=[S][N]C1=CC=CC=C1                    | 0.45  |
| a40 | [C][C@H]1C[C@@H](C(C)=O)C(C)1C            | b14 | O=[S][N]C1=CC=CC=C1                    | 0.93  |
| a41 | [C]CCCN1C(C=CC(Br)=C2)=C2C=C1             | b14 | O=[S][N]C1=CC=CC=C1                    | -1.40 |
| a42 | COC1=C(C(O)=C2C(OCC2=C1C)=O)C/C=C(C[C])\C | b14 | O=[S][N]C1=CC=CC=C1                    | -0.03 |
| a45 | C1(C=CC=C2)=C2C[C]C1                      | b14 | O=[S][N]C1=CC=CC=C1                    | 0.19  |
| a46 | C[C](CC1)CCN1C(OC(C)(C)C)=O               | b14 | O=[S][N]C1=CC=CC=C1                    | 0.82  |
| a47 | CC(OC(N1[C]CCC1)=O)(C)C                   | b14 | O=[S][N]C1=CC=CC=C1                    | 0.50  |
| a6  | [C]CC1=CC=C(F)C=C1                        | b14 | O=[S][N]C1=CC=CC=C1                    | -0.18 |
| a49 | [C]1CCOCC4                                | b14 | O=[S][N]C1=CC=CC=C1                    | 1.51  |
| a2  | [C]1CCCCCCC1                              | b15 | O=[S][N]C1=CC(C)=CC(CI)=C1             | 1.24  |
| a36 | [C]CCCCBr                                 | b15 | O=[S][N]C1=CC(C)=CC(CI)=C1             | -0.66 |
| a39 | [C]CCC1=CC=CS1                            | b15 | O=[S][N]C1=CC(C)=CC(CI)=C1             | -1.61 |
| a44 | O=C(N1CC[C]CC1)C                          | b15 | O=[S][N]C1=CC(C)=CC(CI)=C1             | -0.13 |
| a9  | O=C1[C@H](C2)C[C@H]3C[C@@H]1C[C@@]2C5     | b16 | O=[S][N]C1=CC=C(C(F)(F)F)C=C1          | 0.29  |
| a32 | [C]CCCCBr                                 | b16 | O=[S][N]C1=CC=C(C(F)(F)F)C=C1          | 0.03  |
| a16 | O=C(C12CC[C](CC2)CC1)OC                   | b17 | O=[S][N]C1=C(CI)C=CC=C1                | -0.24 |
| a19 | C[C@@]12C[C@H](C3)C[C@@](C[C@]3C2)(C)C1   | b17 | O=[S][N]C1=C(CI)C=CC=C1                | 0.13  |
| a27 | [C]CCCC1                                  | b17 | O=[S][N]C1=C(CI)C=CC=C1                | -0.03 |
| a28 | [C]CCCCCCCCCCCCCCC                        | b17 | O=[S][N]C1=C(CI)C=CC=C1                | 0.29  |
| a48 | CC(OC(N1CC[C]CC1)=O)(C)C                  | b17 | O=[S][N]C1=C(CI)C=CC=C1                | 0.13  |
| a6  | [C]CC1=CC=C(F)C=C1                        | b17 | O=[S][N]C1=C(CI)C=CC=C1                | -0.92 |
| a9  | O=C1[C@H](C2)C[C@H]3C[C@@H]1C[C@@]2C6     | b2  | O=[S][N]C1CCCCC1                       | -1.82 |
| a38 | [C]CCCC1=CC=CC=C1                         | b2  | O=[S][N]C1CCCCC1                       | -1.82 |
| a14 | C[C]1CC(OC)(OC)C1                         | b3  | CC1=C(C(OCC)=O)SC([N][S]=O)=C1C(OCC)=O | 1.03  |
| a18 | O=C(C12C[C](C2)C1)OC                      | b3  | CC1=C(C(OCC)=O)SC([N][S]=O)=C1C(OCC)=O | 0.19  |
| a5  | [C]CC1=C(F)C=CC(Br)=C1                    | b3  | CC1=C(C(OCC)=O)SC([N][S]=O)=C1C(OCC)=O | 0.29  |
| a40 | [C][C@H]1C[C@@H](C(C)=O)C(C)1C            | b3  | CC1=C(C(OCC)=O)SC([N][S]=O)=C1C(OCC)=O | 1.14  |
| a15 | [C]CCCC1=CC=CC=C1                         | b4  | O=[S][N]C1=CC=CC(Br)=C1                | -1.82 |
| a24 | [C]CCCCCCCCCCCC                           | b4  | O=[S][N]C1=CC=CC(Br)=C1                | -2.30 |
| a35 | CCCCC[C]CCCCCCCC                          | b4  | O=[S][N]C1=CC=CC(Br)=C1                | -2.72 |
| a43 | [C]C1=CC=CC=C1I                           | b4  | O=[S][N]C1=CC=CC(Br)=C1                | -2.30 |
| a6  | [C]CC1=CC=C(F)C=C1                        | b4  | O=[S][N]C1=CC=CC(Br)=C1                | 0.71  |
| a49 | [C]1CCOCC1                                | b4  | O=[S][N]C1=CC=CC(Br)=C1                | -1.19 |
| a13 | C[C]1CCCCC1                               | b5  | CC1=CC=CC([N][S]=O)=N1                 | 0.56  |
| a20 | [C]CCC(C1=CC=CC=C1)=O                     | b5  | CC1=CC=CC([N][S]=O)=N1                 | 0.03  |
| a3  | [C]1CCCC1                                 | b5  | CC1=CC=CC([N][S]=O)=N1                 | 0.82  |
| a39 | [C]C1CCCC1                                | b5  | CC1=CC=CC([N][S]=O)=N1                 | 1.03  |
| a10 | C[C](C)CCCCO1=C(C)C=CC(C)=C1              | b6  | CC([N][S]=O)C1=CC=CC=C1                | -0.76 |
| a2  | [C]1CCCCCCC1                              | b6  | CC([N][S]=O)C1=CC=CC=C1                | 1.03  |
| a34 | CCC[C]CCC                                 | b6  | CC([N][S]=O)C1=CC=CC=C1                | 0.29  |
| a35 | CCCCC[C]CCCCCCCC                          | b6  | CC([N][S]=O)C1=CC=CC=C1                | 1.19  |
| a1  | [C]1CCCCC1                                | b7  | O=[S][N]C1=CC=C(C#N)C=C1               | -2.30 |
| a16 | O=C(C12CC[C](CC2)CC1)OC                   | b7  | O=[S][N]C1=CC=C(C#N)C=C1               | 0.56  |
| a17 | FC1(F)CC[C]CC1                            | b7  | O=[S][N]C1=CC=C(C#N)C=C1               | 1.40  |
| a4  | [C@H]1(C[C]2C3)C[C@@H](C2)C[C@@H]3C1      | b7  | O=[S][N]C1=CC=C(C#N)C=C1               | 0.71  |
| a32 | [C]CCCCBr                                 | b7  | O=[S][N]C1=CC=C(C#N)C=C1               | 0.71  |
| a45 | C1(C=CC=C2)=C2C[C]C1                      | b7  | O=[S][N]C1=CC=C(C#N)C=C1               | 1.24  |
| a6  | [C]CC1=CC=C(F)C=C1                        | b7  | O=[S][N]C1=CC=C(C#N)C=C1               | 1.08  |
| a11 | O=C1C2=C(C=CC([C])=C2)OCC3=CC=CC=C31      | b8  | O=[S][N]C1=CC=CC(OC(F)(F)F)=C1         | 1.56  |
| a2  | [C]1CCCCCCC1                              | b8  | O=[S][N]C1=CC=CC(OC(F)(F)F)=C1         | -1.77 |
| a30 | [C]C(NC(OC(C)(C)C)=O)C(OC(C)(C)C)=O       | b8  | O=[S][N]C1=CC=CC(OC(F)(F)F)=C1         | -0.66 |

|     |                                         |     |                                |       |
|-----|-----------------------------------------|-----|--------------------------------|-------|
| a34 | CCC[C]CCC                               | b8  | O=[S][N]C1=CC=CC(OC(F)(F)F)=C1 | -0.92 |
| a39 | [C]C1CCCC1                              | b8  | O=[S][N]C1=CC=CC(OC(F)(F)F)=C1 | -0.76 |
| a50 | C[C]1CCOCC1                             | b8  | O=[S][N]C1=CC=CC(OC(F)(F)F)=C1 | -0.66 |
| a52 | C[C]1CCC(CC1)=O                         | b8  | O=[S][N]C1=CC=CC(OC(F)(F)F)=C1 | 0.13  |
| A6  | CC1[C]CCCC1                             | b8  | O=[S][N]C1=CC=CC(OC(F)(F)F)=C1 | -1.82 |
| a53 | [C]1CCC=CC1                             | b18 | O=S=NC1=C(C#N)C=CC=C1          | -2.77 |
| a55 | [C]C1CCOCC1                             | b18 | O=S=NC1=C(C#N)C=CC=C1          | -0.55 |
| a57 | C[C](C)CC=C                             | b18 | O=S=NC1=C(C#N)C=CC=C1          | -1.72 |
| a71 | CC[C]CC                                 | b18 | O=S=NC1=C(C#N)C=CC=C1          | -0.87 |
| a53 | [C]1CCC=CC1                             | b19 | BrC1=C(C)C=CC=C1N=S=O          | -0.55 |
| a54 | [C]CC1=CC=C(OC)C=C1                     | b19 | BrC1=C(C)C=CC=C1N=S=O          | 0.24  |
| a55 | [C]C1CCOCC1                             | b19 | BrC1=C(C)C=CC=C1N=S=O          | -1.03 |
| a56 | C[C]C                                   | b19 | BrC1=C(C)C=CC=C1N=S=O          | -1.29 |
| a57 | C[C](C)CC=C                             | b19 | BrC1=C(C)C=CC=C1N=S=O          | 0.66  |
| a71 | CC[C]CC                                 | b19 | BrC1=C(C)C=CC=C1N=S=O          | 0.71  |
| a54 | [C]CC1=CC=C(OC)C=C1                     | b20 | CCC1=C(N=S=O)C=CC=C1           | -0.98 |
| a55 | [C]C1CCOCC1                             | b20 | CCC1=C(N=S=O)C=CC=C1           | -0.08 |
| a57 | C[C](C)CC=C                             | b20 | CCC1=C(N=S=O)C=CC=C1           | 0.50  |
| a71 | CC[C]CC                                 | b20 | CCC1=C(N=S=O)C=CC=C1           | -0.34 |
| a54 | [C]CC1=CC=C(OC)C=C1                     | b21 | O=S=NC1=CC(SC)=CC=C1           | 0.56  |
| a56 | C[C]C                                   | b21 | O=S=NC1=CC(SC)=CC=C1           | 0.61  |
| a71 | CC[C]CC                                 | b21 | O=S=NC1=CC(SC)=CC=C1           | 0.77  |
| a57 | C[C](C)CC=C                             | b22 | O=S=NC1=CC(OC(F)(F)F)=CC=C1    | 1.08  |
| a59 | C[C](C)CCC                              | b22 | O=S=NC1=CC(OC(F)(F)F)=CC=C1    | 0.45  |
| a70 | Br[C@]1(C2)C[C@@H](C[C@@]2C3)C[C@@H]3C1 | b22 | O=S=NC1=CC(OC(F)(F)F)=CC=C1    | 0.24  |
| a71 | CC[C]CC                                 | b22 | O=S=NC1=CC(OC(F)(F)F)=CC=C1    | 0.24  |
| a57 | C[C](C)CC=C                             | b23 | BrC1=CC(N=S=O)=CC=C1C          | 0.56  |
| a71 | CC[C]CC                                 | b23 | BrC1=CC(N=S=O)=CC=C1C          | -0.08 |
| a54 | [C]CC1=CC=C(OC)C=C1                     | b24 | FC1=CC=C(CCN=S=O)C=C1          | -0.55 |
| a56 | C[C]C                                   | b24 | FC1=CC=C(CCN=S=O)C=C1          | -0.87 |
| a57 | C[C](C)CC=C                             | b24 | FC1=CC=C(CCN=S=O)C=C1          | 1.35  |
| a58 | C[C]1CN(C(OC(C)(C)C)=O)CCCC1            | b24 | FC1=CC=C(CCN=S=O)C=C1          | -1.56 |
| a59 | C[C](C)CCC                              | b24 | FC1=CC=C(CCN=S=O)C=C1          | 1.45  |
| a71 | CC[C]CC                                 | b24 | FC1=CC=C(CCN=S=O)C=C1          | 0.66  |
| a53 | [C]1CCC=CC1                             | b25 | O=S=NCCCCC1=CC=CC=C1           | 1.14  |
| a54 | [C]CC1=CC=C(OC)C=C1                     | b25 | O=S=NCCCCC1=CC=CC=C1           | 0.66  |
| a59 | C[C](C)CCC                              | b25 | O=S=NCCCCC1=CC=CC=C1           | 0.50  |
| a70 | Br[C@]1(C2)C[C@@H](C[C@@]2C3)C[C@@H]3C1 | b25 | O=S=NCCCCC1=CC=CC=C1           | -0.71 |

<sup>a</sup> Z-score normalized yields are reported.

### Feature generation

Computationally derived descriptors were collected for the alkyl radicals generated from the carboxylic acids and sulfinylamines (Table S4). All descriptors were derived from the geometries optimized at the PW6B95-D3BJ / def2-SVP level of theory in the gas phase. For the alkyl radicals, descriptors were collected for the radical center carbon atom. For sulfinylamines, descriptors were collected for the sulfur, nitrogen, and oxygen atom of the NSO moiety for the *Z* isomers, after computational studies indicated that *Z* isomers were substantially more stable than *E* isomers for all studied sulfinylamines

(e.g., by 5.1 kcal/mol for sulfinylamine **3**), while *Z*-**TSB** was lower in energy than *E*-**TSB** by 1.2 kcal/mol, indicating that the *Z*-sulfinylamine pathway is primarily responsible for the observed reactivity. DBStep<sup>25</sup> was used to collect the sterimol and buried volume parameters. Multiwfn<sup>10</sup> was used to generate the molecular orbital coefficients. All other features were collected from the Gaussian 16 output files. For Fukui indices (derived using Mulliken charges), the nucleophilic ( $f^-$ ), radical ( $f^0$ ), and electrophilic ( $f^+$ ) indices were generated from the corresponding single point calculations of the anionic and cationic alkyl geometries at the PW6B95-D3BJ / def2-SVP level of theory. All parameters were z-score normalized as previously described.<sup>24</sup>

**Table S4.** Molecular descriptors for the carboxylic acid-derived alkyl radicals and sulfinylamines.

| Feature description <sup>a</sup> | Definition                                                                                                   |
|----------------------------------|--------------------------------------------------------------------------------------------------------------|
| A B <sub>min</sub>               | B <sub>min</sub> Sterimol parameter for the radical carbon atom in the carboxylic acid-derived alkyl radical |
| A B <sub>max</sub>               | B <sub>max</sub> Sterimol parameter for the radical carbon atom in the carboxylic acid-derived alkyl radical |
| <b>A L</b>                       | L Sterimol parameter for the radical carbon atom in the carboxylic acid-derived alkyl radical                |
| B(Z) B <sub>min</sub> S          | B <sub>min</sub> Sterimol parameter for the sulfur atom in the NSO group of <i>Z</i> sulfinylamine           |
| B(Z) B <sub>max</sub> S          | B <sub>max</sub> Sterimol parameter for the sulfur atom in the NSO group of <i>Z</i> sulfinylamine           |
| B(Z) L S                         | L Sterimol parameter for the sulfur atom in the NSO group atom of <i>Z</i> sulfinylamine                     |
| B(Z) B <sub>min</sub> N          | B <sub>min</sub> Sterimol parameter for the nitrogen atom in the NSO group atom of <i>Z</i> sulfinylamine    |
| B(Z) B <sub>max</sub> N          | B <sub>max</sub> Sterimol parameter for the nitrogen atom in the NSO group atom of <i>Z</i> sulfinylamine    |
| <b>B(Z) L N</b>                  | L Sterimol parameter for the nitrogen atom in the NSO group of <i>Z</i> sulfinylamine                        |
| <b>B(Z) B<sub>max</sub> O</b>    | B <sub>max</sub> Sterimol parameter for the oxygen atom in the NSO group of <i>Z</i> sulfinylamine           |
| B(Z) B <sub>min</sub> O          | B <sub>min</sub> Sterimol parameter for the oxygen atom in the NSO group of <i>Z</i> sulfinylamine           |
| B(Z) L O                         | L Sterimol parameter for the oxygen atom in the NSO group of <i>Z</i> sulfinylamine                          |
| A BV_c_rad                       | Buried Volume for the radical carbon atom in the carboxylic acid-derived alkyl radical                       |
| <b>B(Z) BV_S</b>                 | Buried Volume for the sulfur atom in the NSO group of <i>Z</i> sulfinylamine                                 |
| <b>B(Z) BV_N</b>                 | Buried Volume for the nitrogen atom in the NSO group atom of <i>Z</i> sulfinylamine                          |
| <b>B(Z) BV_O</b>                 | Buried Volume for the oxygen atom in the NSO group of <i>Z</i> sulfinylamine                                 |

---

|                     |                                                       |
|---------------------|-------------------------------------------------------|
| A H1a_ene           | HOMO-1 ( $\alpha$ space) energy for the alkyl radical |
| <b>A H1b_ene</b>    | HOMO-1 ( $\beta$ space) energy for the alkyl radical  |
| <b>A Ha_ene</b>     | HOMO ( $\alpha$ space) energy for the alkyl radical   |
| A Hb_ene            | HOMO ( $\beta$ space) energy for the alkyl radical    |
| A Somo_ene          | SOMO energy for the alkyl radical                     |
| <b>A Sumo_ene</b>   | SUMO energy for the alkyl radical                     |
| <b>A La_ene</b>     | LUMO ( $\alpha$ space) energy for the alkyl radical   |
| <b>A Lb_ene</b>     | LUMO ( $\beta$ space) energy for the alkyl radical    |
| A L1a_ene           | LUMO+1 ( $\alpha$ space) energy for the alkyl radical |
| A L1b_ene           | LUMO+1 ( $\beta$ space) energy for the alkyl radical  |
| <b>B(Z) H1a_ene</b> | HOMO-1 energy for Z sulfinylamine                     |
| <b>B(Z) Ha_ene</b>  | HOMO energy for Z sulfinylamine                       |
| B(Z) La_ene         | LUMO energy for Z sulfinylamine                       |
| <b>B(Z) L1a_ene</b> | LUMO+1 energy for Z sulfinylamine                     |

---

|                                     |                                                                                                               |
|-------------------------------------|---------------------------------------------------------------------------------------------------------------|
| <b>A <math>\alpha</math> HOMO-1</b> | HOMO-1 ( $\alpha$ space) coefficient for the radical carbon atom in the carboxylic acid-derived alkyl radical |
| <b>A <math>\alpha</math> HOMO</b>   | HOMO ( $\alpha$ space) coefficient for the radical carbon atom in the carboxylic acid-derived alkyl radical   |
| A $\alpha$ LUMO                     | LUMO ( $\alpha$ space) coefficient for the radical carbon atom in the carboxylic acid-derived alkyl radical   |
| A $\alpha$ LUMO+1                   | LUMO+1 ( $\alpha$ space) coefficient for the radical carbon atom in the carboxylic acid-derived alkyl radical |
| A $\beta$ HOMO-1                    | HOMO-1 ( $\beta$ space) coefficient for the radical carbon atom in the carboxylic acid-derived alkyl radical  |
| A $\beta$ HOMO                      | HOMO ( $\beta$ space) coefficient for the radical carbon atom in the carboxylic acid-derived alkyl radical    |
| A $\beta$ LUMO                      | LUMO ( $\beta$ space) coefficient for the radical carbon atom in the carboxylic acid-derived alkyl radical    |
| A $\beta$ LUMO+1                    | LUMO+1 ( $\beta$ space) coefficient for the radical carbon atom in the carboxylic acid-derived alkyl radical  |
| A Somo                              | SOMO coefficient for the radical carbon atom in the carboxylic acid-derived alkyl radical                     |
| A Sumo                              | SUMO coefficient for the radical carbon atom in the carboxylic acid-derived alkyl radical                     |
| <b>B(Z) HOMO-1 S</b>                | HOMO-1 coefficient for the sulfur atom in the NSO group of Z Sulfinylamine                                    |
| <b>B(Z) HOMO S</b>                  | HOMO coefficient for the sulfur atom in the NSO group of Z sulfinylamine                                      |



|                                   |                                                                                       |
|-----------------------------------|---------------------------------------------------------------------------------------|
| <b>B(Z) LUMO S</b>                | LUMO coefficient for the sulfur atom in the NSO group of Z sulfinylamine              |
| <b>B(Z) LUMO+1 S</b>              | LUMO+1 coefficient for the sulfur atom in the NSO group of Z sulfinylamine            |
| <b>B(Z) HOMO-1 N</b>              | HOMO-1 coefficient for the nitrogen atom in the NSO group atom of Z sulfinylamine     |
| <b>B(Z) HOMO N</b>                | HOMO coefficient for the nitrogen atom in the NSO group atom of Z sulfinylamine       |
| B(Z) LUMO N                       | LUMO coefficient for the nitrogen atom in the NSO group atom of Z sulfinylamine       |
| B(Z) LUMO+1 N                     | LUMO+1 coefficient for the nitrogen atom in the NSO group atom of Z sulfinylamine     |
| <b>B(Z) HOMO-1 O</b>              | HOMO-1 coefficient for the oxygen atom in the NSO group of Z sulfinylamine            |
| <b>B(Z) HOMO O</b>                | HOMO coefficient for the oxygen atom in the NSO group of Z sulfinylamine              |
| B(Z) LUMO O                       | LUMO coefficient for the oxygen atom in the NSO group of Z sulfinylamine              |
| B(Z) LUMO+1 O                     | LUMO+1 coefficient for the oxygen atom in the NSO group of Z sulfinylamine            |
| <b>A Fukui electrophilic</b>      | Fukui index for the radical carbon atom in the carboxylic acid-derived alkyl radical  |
| <b>A Fukui nucleophilic</b>       | Fukui index for the radical carbon atom in the carboxylic acid-derived alkyl radical  |
| <b>A Fukui ave</b>                | Fukui index for the radical carbon atom in the carboxylic acid-derived alkyl radical  |
| <b>B(Z) Fukui electrophilic S</b> | Fukui index for the sulfur atom in the NSO group of Z sulfinylamine                   |
| <b>B(Z) Fukui nucleophilic S</b>  | Fukui index for the sulfur atom in the NSO group of Z sulfinylamine                   |
| <b>B(Z) Fukui ave S</b>           | Fukui index for the sulfur atom in the NSO group of Z sulfinylamine                   |
| <b>B(Z) Fukui electrophilic N</b> | Fukui index for the nitrogen atom in the NSO group atom of Z sulfinylamine            |
| B(Z) Fukui nucleophilic N         | Fukui index for the nitrogen atom in the NSO group atom of Z sulfinylamine            |
| B(Z) Fukui ave N                  | Fukui index for the nitrogen atom in the NSO group atom of Z sulfinylamine            |
| <b>B(Z) Fukui electrophilic O</b> | Fukui index for the oxygen atom in the NSO group of Z sulfinylamine                   |
| <b>B(Z) Fukui nucleophilic O</b>  | Fukui index for the oxygen atom in the NSO group of Z sulfinylamine                   |
| <b>B(Z) Fukui ave O</b>           | Fukui index for the oxygen atom in the NSO group of Z sulfinylamine                   |
| <b>A SD</b>                       | Spin Density for the radical carbon atom in the carboxylic acid-derived alkyl radical |

<sup>a</sup> Features in bold were selected for model development.

### Predictive model development

A set of ML algorithms available in the scikit-learn<sup>[26]</sup> and XGBoost<sup>[27]</sup> python packages were evaluated (Table S5) to develop a predictive model. The predictive performance of the various regression models in leave-one-out cross validation (LOOCV) is reported in Table S5 (see Table S6 for model details). The Support Vector Regression (SVR)<sup>28</sup> was identified as the best-performing model, with LOOCV  $R^2 = 0.81$ . Feature selection was then performed using forward feature selection.<sup>[29]</sup> In each round of feature selection, the best-performing feature was selected, and the best-performing feature combination was then iteratively selected to provide the model with LOOCV  $R^2 = 0.85$ , Pearson  $R = 0.98$ ,  $R^2 = 0.97$ , RMSE = 0.18, MAE = 0.10. The relative importance of the features in the developed model was evaluated by means of feature importance analysis (Figure S3). To ensure that the ML algorithm was learning from the meaningful chemical features and not based on unrelated patterns within the dataset, the yields were randomly shuffled, and the predictive performance of a model trained on the Y-randomized dataset was tested. The straw model showed low predictive performance (LOOCV  $R^2 = -0.44$ , MAE = 0.99), pointing to the importance of the chemical features for the development of the predictive model. Additionally, the computationally produced features were replaced by random numbers for all alkyl radical and sulfinylamine fragments, and another straw model was generated. The resulting straw model also showed low predictive performance (LOOCV  $R^2 = 0.29$ , MAE = 0.69), supporting the conclusion.

**Table S5.** Predictive performance of evaluated machine learning algorithms based on LOOCV.

| Method            | $R^2$ | MAE  |
|-------------------|-------|------|
| XGBoost           | 0.50  | 0.55 |
| Random Forest     | 0.65  | 0.48 |
| Decision tree     | 0.32  | 0.68 |
| Bagging           | 0.53  | 0.52 |
| Extra Trees       | 0.72  | 0.43 |
| Gradient Boosting | 0.65  | 0.46 |
| KNNR              | 0.59  | 0.50 |
| Kernel ridge      | 0.73  | 0.42 |
| LSVR              | 0.70  | 0.41 |
| Ridge             | 0.73  | 0.43 |
| SVR               | 0.81  | 0.37 |

**Table S6.** Hyperparameters

| Models                                        | Hyperparameters                                                                                                                                                                                                                                                                                                                                                                                                                  |
|-----------------------------------------------|----------------------------------------------------------------------------------------------------------------------------------------------------------------------------------------------------------------------------------------------------------------------------------------------------------------------------------------------------------------------------------------------------------------------------------|
| Support Vector Regression (SVR) <sup>28</sup> | (kernel='rbf', degree=3, gamma='auto', coef0=0.0, tol=0.05, C=4.25, epsilon=0.05, shrinking=True, cache_size=200, verbose=False, max_iter=-1)                                                                                                                                                                                                                                                                                    |
| Bagging (BG) <sup>30</sup>                    | (base_estimator=None, n_estimators=10, max_samples=1.0, max_features=1.0, bootstrap=True, bootstrap_features=False, oob_score=False, warm_start=False, n_jobs=60, random_state=None, verbose=0)                                                                                                                                                                                                                                  |
| Decision Tree (DT) <sup>31</sup>              | (criterion='friedman_mse', splitter='best', max_depth=None, min_samples_split=2, min_samples_leaf=1, min_weight_fraction_leaf=0.0, max_features=None, random_state=None, max_leaf_nodes=None, min_impurity_decrease=0.0, ccp_alpha=0.0)                                                                                                                                                                                          |
| Extra Trees (ET) <sup>32</sup>                | (n_estimators=100, criterion='friedman_mse', max_depth=None, min_samples_split=2, min_samples_leaf=1, min_weight_fraction_leaf=0.0, max_features='sqrt', max_leaf_nodes=None, min_impurity_decrease=0.0, bootstrap=False, oob_score=False, n_jobs=60, random_state=None, verbose=0, warm_start=False, ccp_alpha=0.0, max_samples=None)                                                                                           |
| Gradient Boosting (GB) <sup>33</sup>          | (loss='squared_error', learning_rate=0.1, n_estimators=100, subsample=1.0, criterion='friedman_mse', min_samples_split=2, min_samples_leaf=1, min_weight_fraction_leaf=0.0, max_depth=3, min_impurity_decrease=0.0, init=None, random_state=None, max_features=None, alpha=0.9, verbose=0, max_leaf_nodes=None, warm_start=False, validation_fraction=0.1, n_iter_no_change=None, tol=0.0001, ccp_alpha=0.0)                     |
| Kernel Ridge <sup>34</sup>                    | (alpha=1, kernel='linear', gamma=None, degree=3, coef0=1, kernel_params=None)                                                                                                                                                                                                                                                                                                                                                    |
| K-Nearest Neighbor <sup>35</sup>              | (n_neighbors=5, weights='uniform', algorithm='auto', leaf_size=30, p=2, metric='minkowski', metric_params=None, n_jobs=None)                                                                                                                                                                                                                                                                                                     |
| Linear SVR <sup>25</sup>                      | (epsilon=0.0, tol=0.0001, C=1.0, loss='epsilon_insensitive', fit_intercept=True, intercept_scaling=1.0, dual=True, verbose=0, random_state=None, max_iter=1000)                                                                                                                                                                                                                                                                  |
| Random Forest (RF) <sup>36</sup>              | (n_estimators=100, criterion='friedman_mse', max_depth=None, min_samples_split=2, min_samples_leaf=1, min_weight_fraction_leaf=0.0, max_features='sqrt', max_leaf_nodes=None, min_impurity_decrease=0.0, bootstrap=True, oob_score=False, n_jobs=60, random_state=None, verbose=0, warm_start=False, ccp_alpha=0.0, max_samples=None)                                                                                            |
| Ridge <sup>37</sup>                           | (alpha=1.0, fit_intercept=True, copy_X=True, max_iter=None, tol=0.001)                                                                                                                                                                                                                                                                                                                                                           |
| XGBoost (XGB) <sup>38</sup>                   | (base_score=0.5, colsample_bynode=1, colsample_bytree=1, gamma=0, gpu_id=-1, importance_type='gain', interaction_constraints='', learning_rate=0.3, max_delta_step=0, max_depth=10, min_child_weight=1, missing=np.nan, monotone_constraints='()', n_estimators=60, num_parallel_tree=1, random_state=0, reg_alpha=0, reg_lambda=1, scale_pos_weight=1, subsample=1, tree_method='exact', validate_parameters=1, verbosity=None) |

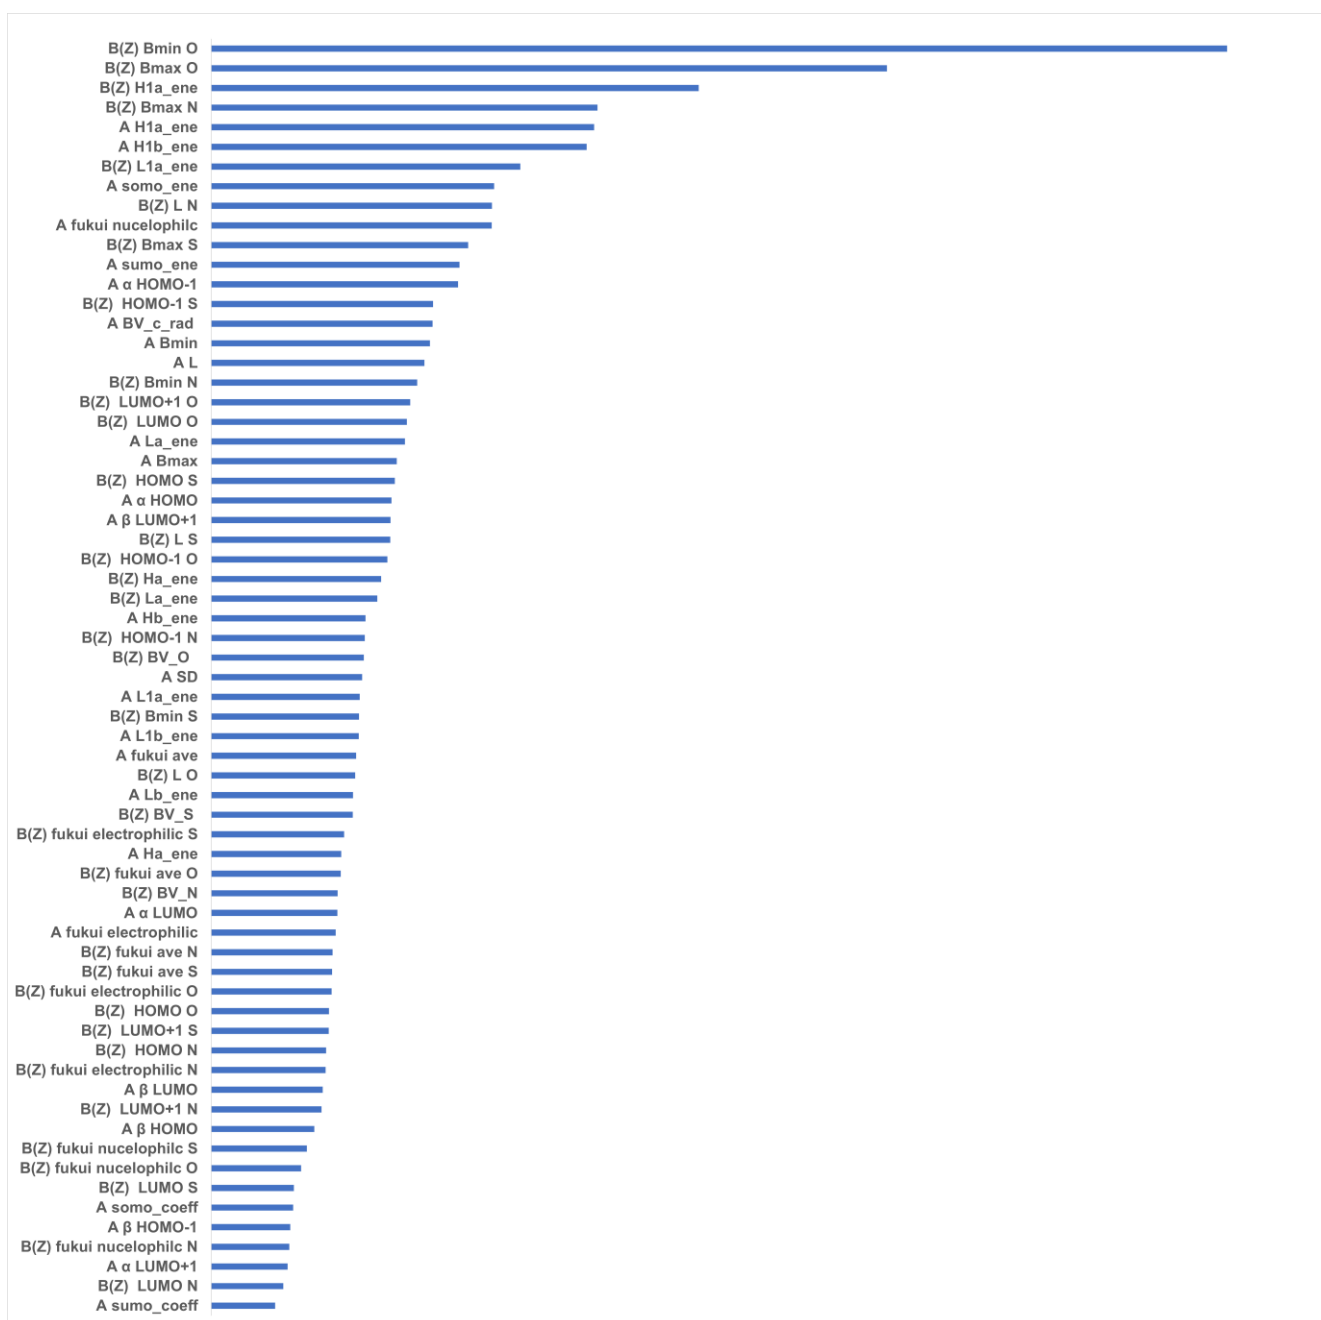

**Figure S3.** Feature importance analysis for the developed predictive model.

**Table S7.** Computationally-derived steric and MO energy descriptors for the alkyl radical fragments.<sup>a</sup>

| Alkyl radical | Steric   |          |          |          | MO Energies |          |          |          |          |          |          |          |          |          |
|---------------|----------|----------|----------|----------|-------------|----------|----------|----------|----------|----------|----------|----------|----------|----------|
|               | Bmin     | Bmax     | L        | BV_c_rad | h1a         | h1b      | A ha     | A hb     | somo     | sumo     | la       | lb       | l1a      | l1b      |
| a1            | 0.31435  | -0.80381 | -0.73281 | 0.12807  | -0.48377    | -0.48109 | -0.87054 | -0.89978 | 0.98289  | 1.1716   | 0.79265  | 0.79091  | 0.91674  | 0.93286  |
| a2            | 0.79446  | -0.0942  | -0.66619 | 0.35386  | -0.54922    | -0.58637 | -1.0374  | -1.10074 | 0.56536  | 0.67135  | 0.90592  | 0.96438  | 0.63325  | 0.62113  |
| a3            | -1.40837 | -0.82946 | -1.06596 | -0.33909 | -0.82998    | -0.77036 | -1.32654 | -1.31428 | 0.36466  | 0.6211   | 1.18839  | 1.17022  | 1.21637  | 1.35023  |
| a4            | 1.3028   | 0.07679  | -0.74947 | 1.3868   | 0.27346     | 0.27787  | -0.41369 | -0.42064 | 1.20112  | 0.89035  | 0.48208  | 0.51154  | 1.05803  | 1.02214  |
| a5            | -1.09771 | 0.82915  | 0.39987  | -1.10731 | 0.64054     | 0.60406  | 0.81117  | 0.78541  | -1.6872  | -0.80241 | -1.53637 | -1.47531 | -2.18582 | -2.2517  |
| a6            | -0.70234 | -0.27374 | 0.2333   | -1.07227 | 0.88209     | 0.81753  | 0.69917  | 0.72954  | -1.42405 | -0.63591 | -1.2556  | -1.2919  | -1.76774 | -1.81795 |
| a7            | 0.34259  | 0.30763  | -0.74947 | 0.34348  | -0.47903    | -0.48563 | -0.81111 | -0.81905 | 0.97587  | 1.04785  | 0.85085  | 0.85962  | 0.78885  | 0.78024  |
| a8            | -0.05278 | -0.76106 | -0.88273 | 1.03903  | -0.70635    | -0.67901 | 0.21603  | 0.33025  | 0.21098  | -0.11241 | 0.76625  | 0.75627  | 0.81656  | 0.85222  |
| a9            | 0.76621  | 0.25633  | -0.56624 | 1.39459  | -0.4512     | -0.43963 | 0.8846   | 0.85796  | -0.13567 | -0.68616 | -1.0654  | -0.96994 | -0.33719 | -0.31866 |
| a10           | 1.18983  | 1.62426  | 0.59976  | 1.56329  | 1.85843     | 1.81652  | 1.72946  | 1.71123  | 0.84254  | 0.29109  | -0.72501 | -0.77177 | -1.11976 | -1.19018 |
| a11           | -0.25047 | 2.18852  | 1.03284  | -1.12029 | 0.82992     | 0.97139  | 0.2826   | 0.42415  | 0.85447  | -2.52592 | -3.0106  | -2.90199 | -2.37522 | -2.44849 |
| a12           | -0.30696 | 0.84625  | 0.74967  | -1.09434 | 1.60834     | 1.59981  | 1.57946  | 1.62201  | -0.78477 | -0.03141 | -0.78293 | -0.81577 | -1.38864 | -1.43146 |
| a13           | 0.22963  | -0.79526 | -0.73281 | 1.3894   | -0.32379    | -0.31913 | -0.8714  | -0.88984 | 1.85935  | 1.4686   | 0.76     | 0.75116  | 0.89147  | 0.89146  |
| a14           | 0.25787  | 1.02579  | -0.41633 | 0.95857  | 0.6124      | 0.54673  | 0.17631  | 0.1097   | 1.16533  | 0.89185  | 1.01976  | 0.9959   | 0.74957  | 0.72587  |
| a15           | -1.46485 | -0.42763 | 0.8163   | -1.23578 | 1.27667     | 1.22179  | 0.68546  | 0.68362  | -0.95178 | -0.10491 | -0.91919 | -0.96483 | -1.75221 | -1.78551 |
| a16           | 1.75466  | -0.44473 | 0.16667  | 1.34528  | -0.09772    | -0.07942 | -0.17711 | -0.22231 | 0.06222  | 0.21159  | -0.36164 | -0.40665 | -0.21752 | -0.20065 |
| a17           | 0.28611  | -0.80381 | -0.51627 | 0.11379  | -1.51575    | -1.49401 | -1.19997 | -1.25987 | -0.61846 | -0.38616 | 0.76057  | 0.76706  | 0.93349  | 0.92266  |
| a18           | 0.20139  | -0.10275 | -0.04987 | 0.36554  | -0.69086    | -0.8047  | -0.7634  | -0.60288 | -0.71109 | -0.84516 | -0.76078 | -0.74309 | 0.43837  | 0.40488  |
| a19           | 1.10511  | 1.03434  | -0.48296 | 1.3907   | 0.18525     | 0.17292  | -0.37969 | -0.39577 | 1.21305  | 0.8161   | 0.47072  | 0.45731  | 0.70725  | 0.66439  |
| a20           | -0.67409 | -0.0087  | 0.88293  | -1.23578 | 0.87861     | 0.81267  | 0.30003  | 0.2504   | -0.98336 | -0.68391 | -2.48001 | -2.24671 | -2.18308 | -2.27425 |
| a21           | -0.75882 | -0.75251 | -1.2825  | 0.834    | -0.86918    | -0.84778 | 0.21346  | 0.33084  | 0.23274  | -0.02316 | 0.94822  | 0.93116  | 0.84244  | 0.89486  |
| a22           | 0.9639   | -0.8551  | -1.0493  | 0.94949  | -0.59221    | -0.56985 | -1.18311 | -1.10864 | 1.50006  | 1.1431   | 1.08534  | 1.06858  | 0.98404  | 0.96468  |
| a23           | -0.53289 | -1.23128 | 1.66581  | -1.23838 | -0.73101    | -0.83871 | -1.14111 | -1.15457 | -0.81495 | 0.21084  | 0.92494  | 0.88602  | 0.43289  | 0.40982  |
| a24           | -1.52133 | 1.22243  | 2.16553  | -1.22799 | -0.43982    | -0.53843 | -0.81369 | -0.89423 | -0.81354 | 0.19659  | 0.86164  | 0.82242  | 0.30896  | 0.26246  |
| a25           | -0.53289 | -1.18854 | 0.38321  | -1.23448 | 0.17165     | 0.11461  | -0.46283 | -0.54935 | -1.42264 | -0.44466 | 0.4324   | 0.42523  | 0.42071  | 0.41198  |
| a26           | -0.39168 | -0.42763 | 0.05007  | -1.22799 | 1.25675     | 1.22989  | 0.60717  | 0.54847  | -1.95455 | -0.96591 | 0.18513  | 0.14046  | -0.08172 | -0.1265  |
| a27           | -1.2954  | -1.07739 | -0.04987 | -1.23448 | 0.06574     | 0.0495   | -0.49283 | -0.57889 | -1.59667 | -0.59391 | 0.41082  | 0.38463  | 0.47765  | 0.52444  |
| a28           | -0.53289 | -1.19708 | 5.04721  | -1.23838 | -0.67505    | -0.78202 | -0.65969 | -0.72954 | -0.81003 | 0.21534  | 0.89599  | 0.85082  | 0.2374   | 0.19016  |
| a29           | 0.51204  | 0.99159  | 2.06558  | -1.23708 | 1.39429     | 1.34002  | 0.95089  | 0.89949  | -0.89494 | 0.12384  | -0.52232 | -0.57075 | -0.69559 | -0.76415 |
| a30           | 3.64683  | 2.14578  | 0.43318  | -0.97365 | 0.69239     | 0.62868  | 0.36517  | 0.49465  | -2.09841 | -1.45716 | -0.48683 | -0.46911 | -0.41454 | -0.47282 |
| a31           | 0.76621  | 3.04347  | 5.51361  | -1.23578 | -0.32537    | -0.38068 | 0.86546  | 0.8094   | -0.82407 | 0.20109  | -0.05561 | -0.10485 | 0.13265  | 0.07864  |
| a32           | -1.06947 | -1.05174 | 0.01676  | -1.23059 | 0.60607     | 0.59175  | -0.01626 | -0.09068 | -1.63527 | -0.68991 | -0.48513 | -0.50829 | 0.23222  | 0.25473  |
| a33           | -1.43661 | 2.83829  | 3.96449  | -1.23448 | -0.36773    | -0.46587 | 0.84489  | 0.7939   | -0.84512 | 0.17409  | -0.06867 | -0.1162  | 0.13874  | 0.0879   |
| a34           | -0.44816 | 0.55557  | -0.4663  | 0.24745  | -0.93811    | -0.94625 | -1.34169 | -1.36693 | 0.58079  | 0.88135  | 1.01976  | 0.98823  | 0.5078   | 0.48335  |
| a35           | -0.64585 | 3.77018  | 1.66581  | 0.40966  | -0.60138    | -0.64856 | -0.90654 | -0.9384  | 0.8285   | 0.97735  | 0.78499  | 0.76138  | 0.28673  | 0.23743  |
| a36           | -0.56113 | -1.16289 | 0.4665   | -1.23838 | 0.6946      | 0.64099  | 0.01089  | -0.06406 | -1.45422 | -0.51741 | -0.44879 | -0.45548 | 0.17132  | 0.15556  |
| a37           | 1.72642  | 2.05173  | 1.29935  | -0.98922 | 0.86597     | 0.81364  | 0.44831  | 0.45984  | -1.45633 | -0.60066 | -1.50145 | -1.54771 | -2.21414 | -2.30514 |
| a38           | -1.43661 | 0.58121  | 0.38321  | -1.23189 | 1.246       | 1.19296  | 0.69489  | 0.66694  | -0.61004 | 0.3916   | -0.98278 | -1.0148  | -1.77231 | -1.84513 |
| a39           | -0.53289 | -0.64137 | 0.43318  | -1.23059 | 1.41263     | 1.35784  | 1.20289  | 1.15896  | -1.50615 | -0.47016 | -1.04354 | -1.09032 | -0.14018 | -0.19323 |

|     |          |          |          |          |          |          |          |          |          |          |          |          |          |          |
|-----|----------|----------|----------|----------|----------|----------|----------|----------|----------|----------|----------|----------|----------|----------|
| a40 | -0.30696 | 0.58121  | 0.13336  | -0.94121 | -0.35856 | -0.35606 | 0.7166   | 0.67835  | -0.9188  | -0.75816 | -1.13069 | -1.17578 | -0.15236 | -0.19941 |
| a41 | -1.06947 | 1.13693  | 1.44927  | -1.05541 | 2.3213   | 2.32768  | 1.4826   | 1.75189  | -1.26054 | -1.19316 | -1.41657 | -1.46452 | -1.24095 | -1.31437 |
| a42 | 0.70973  | 1.77815  | 0.91624  | -0.99312 | 1.55111  | 1.54507  | 1.15231  | 1.11567  | -1.3651  | -0.48291 | -1.88044 | -1.92759 | -2.04149 | -2.12658 |
| a43 | -1.1542  | 0.8035   | -0.24976 | -0.88152 | 1.02342  | 0.96848  | 0.7306   | 0.81232  | -0.24163 | -3.66892 | -1.53268 | -1.47645 | -2.32102 | -2.15994 |
| a44 | -0.53289 | -0.35923 | -0.09984 | 0.08914  | 1.63932  | 1.70574  | 2.21603  | 0.86878  | -0.27111 | -0.29766 | 0.10394  | -2.39662 | -0.69833 | -0.7555  |
| a45 | -0.67409 | 0.08534  | -0.1165  | -0.09902 | 1.44077  | 1.39056  | 0.8306   | 0.86995  | 0.24116  | 0.41485  | -0.9561  | -0.89726 | -1.56585 | -1.62857 |
| a46 | 2.20652  | -0.14549 | 0.61641  | 1.34009  | 0.91845  | 0.85575  | 0.90546  | 0.9071   | 0.83973  | 0.38785  | 0.61607  | 0.58791  | 0.1293   | 0.08234  |
| a47 | 0.08842  | 0.08534  | -0.03322 | 0.09433  | -0.06516 | 0.3812   | -0.03511 | -0.04446 | 2.87264  | 1.32685  | 0.74978  | 0.73839  | 0.12047  | 0.26153  |
| a48 | 2.23476  | -0.16259 | 0.59976  | 0.09303  | 0.88304  | 0.8198   | 0.82231  | 0.87405  | 0.01169  | 0.01209  | 0.63594  | 0.61517  | 0.12352  | 0.08018  |
| a49 | -0.19399 | 0.15374  | -0.88273 | 0.08005  | -0.28268 | -0.32464 | 0.30231  | 0.35015  | 0.12888  | 0.15234  | 1.07767  | 1.1211   | 1.10523  | 1.10185  |
| a50 | 0.20139  | 0.15374  | -0.88273 | 1.3323   | -0.26213 | -0.30941 | 0.39517  | 0.38964  | 0.97096  | 0.54835  | 0.97746  | 0.97318  | 0.90669  | 0.89269  |
| a51 | -0.67409 | -0.80381 | 0.36656  | -1.1138  | 0.96145  | 0.90369  | 0.29631  | 0.60376  | 0.02923  | -3.56167 | -1.58832 | -1.5267  | -2.28813 | -2.12565 |
| a52 | 0.39908  | -0.79526 | -0.53293 | 1.35696  | -1.30075 | -1.25722 | 0.78803  | 0.74124  | 0.20326  | -0.23316 | -1.1375  | -1.16556 | 0.20604  | 0.20623  |
| a53 | -0.39168 | -0.80381 | -0.71616 | 0.08005  | -0.56186 | -0.58605 | 0.7846   | 0.77283  | 0.44957  | 0.7786   | -0.04709 | -0.06226 | 0.23984  | 0.24763  |
| a54 | -0.44816 | -0.42763 | 0.74967  | -1.09434 | 1.26561  | 1.21628  | 1.43317  | 1.51056  | -0.78618 | -0.07941 | -0.90727 | -0.9353  | -1.3591  | -1.40242 |
| a55 | -0.78706 | 0.47007  | -0.4663  | -1.01907 | -0.25897 | -0.31297 | 0.41374  | 0.3873   | -1.18546 | -0.27591 | 1.00954  | 0.9817   | 0.74531  | 0.74842  |
| a56 | -1.18244 | -0.78671 | -1.31581 | -0.15353 | -1.96187 | -1.96014 | -2.15426 | -2.10115 | 0.57448  | 1.0996   | 1.22303  | 1.20685  | 1.34913  | 1.42252  |
| a57 | -0.13751 | -0.80381 | -0.53293 | 1.28299  | -1.33269 | -1.34436 | 0.28831  | 0.258    | 1.11832  | 0.87385  | -0.27079 | -0.23744 | 0.25689  | 0.22971  |
| a58 | 1.38752  | 0.0084   | 0.56644  | 1.31933  | 0.94785  | 0.88815  | 0.98374  | 0.99339  | 0.61448  | 0.3646   | 0.64986  | 0.6339   | 0.14118  | 0.10242  |
| a59 | 0.87918  | -0.77816 | -0.4663  | 1.30246  | -1.05446 | -0.97702 | -1.42883 | -1.48716 | 1.559    | 1.41385  | 0.7566   | 0.72561  | 0.91187  | 0.88126  |
| a60 | 0.17315  | 0.50427  | -0.38301 | 1.40238  | 0.82739  | 0.80943  | 0.14089  | 0.07957  | 0.16748  | -0.60591 | -0.62338 | -0.44895 | -0.10212 | -0.13175 |
| a61 | -0.70234 | 0.17084  | -0.86607 | 0.24226  | -1.01652 | -0.98739 | -1.50254 | -1.50354 | 0.63974  | 0.8941   | 0.98768  | 1.03366  | 1.05712  | 1.04006  |

<sup>a</sup> See Table S4 for the definition of the descriptors.

**Table S8.** Computationally-derived descriptors for the alkyl radical fragments based on MO coefficients, charges, and spin density.<sup>a</sup>

| Alkyl radical | MO Coefficients |               |               |                 |                |              |              |                  |          |          | Charges and spin density |                      |           |          |
|---------------|-----------------|---------------|---------------|-----------------|----------------|--------------|--------------|------------------|----------|----------|--------------------------|----------------------|-----------|----------|
|               | $\alpha$ homo-1 | $\alpha$ homo | $\alpha$ lumo | $\alpha$ lumo+1 | $\beta$ homo-1 | $\beta$ homo | $\beta$ lumo | A $\beta$ lumo+1 | somo     | sumo     | fukui electrophilic      | A fukui nucleophilic | fukui ave | SD       |
| a1            | 0.4261          | 0.37812       | 0.70402       | 0.23696         | 0.69951        | 0.69229      | 0.04498      | 0.178283         | 0.15716  | 0.13405  | 0.60804389               | 0.36620348           | 0.49575   | 0.23678  |
| a2            | -0.29636        | -0.56014      | 0.68861       | 0.5297          | 0.05302        | -0.355       | 0.25527      | 0.26685          | 0.19885  | 0.03966  | 0.521405163              | -0.018606            | 0.23862   | 0.28055  |
| a3            | 2.21112         | 2.65007       | 0.68861       | 0.7192          | 1.10931        | 2.83538      | -0.0418      | 1.348402         | 0.35384  | 0.2491   | 1.231015079              | 0.81620059           | 1.04561   | 0.26649  |
| a4            | -0.00715        | 0.2502        | -0.17659      | -0.67633        | 0.20394        | 0.60214      | -0.0169      | -0.673763        | -0.55734 | -0.17948 | -1.01666117              | -1.1276057           | -1.11781  | -0.86178 |
| a5            | -0.5867         | -0.44142      | -0.22753      | -0.78975        | -0.62588       | -0.62226     | 0.32403      | -0.503559        | 1.10944  | 0.44513  | 0.394370249              | 0.67505326           | 0.56684   | 0.93724  |
| a6            | -0.88327        | 0.26294       | -0.79183      | -0.54735        | -0.94106       | -0.42974     | -0.39518     | -0.565685        | 0.66604  | 0.81477  | 0.190945335              | 0.93271314           | 0.61413   | 0.77774  |
| a7            | 0.40772         | 0.54178       | 0.52592       | -0.15307        | 0.60226        | 0.96257      | 0.03419      | -0.131319        | 0.08332  | 0.05288  | 0.656540446              | 0.33753293           | 0.50284   | 0.21717  |
| a8            | 1.16793         | 0.29744       | 0.69256       | 1.161           | 1.31343        | -0.28557     | 0.01629      | 0.789014         | -0.64508 | -0.20073 | -1.06933117              | -0.7275532           | -0.91868  | -0.57131 |
| a9            | 0.40447         | -0.822        | -0.56319      | -0.34003        | 0.64554        | -0.66424     | 0.01724      | 0.11359          | -0.5259  | -0.47402 | -1.00125286              | -1.3165823           | -1.2164   | -0.90236 |
| a10           | -0.90588        | -0.71619      | -0.91899      | -0.95125        | -0.95425       | -0.71277     | -0.49902     | -0.907376        | -0.50128 | -0.59769 | -2.05798118              | -1.9064665           | -2.05187  | -0.45941 |
| a11           | -0.75887        | -0.8657       | -0.86607      | -0.9521         | -0.94417       | 1.15633      | -0.4752      | -0.930481        | -2.49041 | -1.68331 | -1.18877639              | -0.8628344           | -1.05158  | -2.49083 |
| a12           | -0.52479        | 1.0715        | -0.77841      | -0.50351        | -0.87607       | -0.54486     | -0.38427     | -0.519476        | -0.21416 | 0.83397  | -0.49890672              | 0.99499019           | 0.31953   | 0.79993  |
| a13           | 0.67969         | 0.32362       | 0.28385       | -0.28544        | 0.71534        | 0.89916      | -0.08104     | -0.259421        | -0.42992 | -0.51397 | -1.13681077              | -1.4614653           | -1.36238  | -0.43656 |
| a14           | -0.63109        | -0.74079      | 0.03941       | 0.04407         | -0.6293        | -0.58206     | -0.23941     | -0.047115        | -0.286   | -0.38638 | -0.58239335              | -0.8837935           | -0.77368  | -0.39466 |
| a15           | -0.91366        | -0.29209      | -0.94544      | -0.89298        | -0.95813       | -0.64617     | -0.50697     | -0.285606        | 0.89946  | 0.7997   | 0.436228024              | 0.64455236           | 0.56974   | 0.96059  |
| a16           | 0.51826         | -0.65798      | -0.85501      | -0.90684        | 0.86626        | -0.62155     | -0.47994     | 0.235274         | -0.18331 | 0.0284   | -0.851713                | -0.9480959           | -0.93838  | -0.68246 |
| a17           | 1.16256         | -0.02953      | 1.63359       | 0.0698          | 1.51337        | 0.26721      | 0.26689      | -0.027348        | 0.36161  | 0.20808  | 0.824006766              | 0.33127672           | 0.57932   | 0.22659  |
| a18           | -0.90701        | 0.41793       | -0.52568      | -0.51681        | -0.9392        | 0.00844      | -0.37835     | -0.555673        | -0.44688 | 0.68356  | -1.02956893              | 0.62701396           | -0.14025  | -2.54011 |
| a19           | -0.19968        | 0.0285        | -0.41511      | -0.81152        | 0.01657        | 0.36817      | -0.24783     | -0.80777         | -0.6253  | -0.16617 | -1.04113837              | -1.0848324           | -1.10552  | -0.86776 |
| a20           | -0.8998         | -0.69832      | -0.91978      | -0.97133        | -0.9558        | -0.62014     | 6.89151      | -0.945114        | 1.18658  | -5.04797 | 1.106040476              | -0.0016077           | 0.52741   | 0.90371  |
| a21           | 1.06191         | 0.33831       | 1.12852       | 1.54792         | 1.20191        | -0.27777     | 0.11029      | 1.216192         | -0.60339 | -0.15334 | -1.17856289              | -0.8303381           | -1.02848  | -0.54559 |
| a22           | 1.59623         | 1.88237       | 0.75851       | 0.04661         | 1.81366        | 2.36798      | -0.0105      | -0.060208        | -0.36326 | -0.44102 | -0.85030424              | -1.1944136           | -1.0758   | -0.44568 |
| a23           | -0.90758        | -0.18735      | -0.47947      | -0.03513        | -0.94448       | -0.09747     | -0.39933     | -0.169826        | 1.17799  | 1.0207   | 1.48885334               | 1.43083956           | 1.51336   | 0.99053  |
| a24           | -0.90532        | -0.78449      | -0.26781      | -0.68           | -0.91097       | -0.6607      | -0.3314      | -0.705853        | 1.16786  | 1.01365  | 1.659101961              | 1.45936009           | 1.61067   | 0.98469  |
| a25           | -0.76029        | -0.88091      | -0.45775      | 1.13215         | -0.85079       | -0.72481     | -0.25387     | 0.606231         | 1.22003  | 0.96537  | 1.589368351              | 1.19014797           | 1.42643   | 0.98896  |
| a26           | -0.53355        | -0.83456      | -0.66902      | -0.09339        | -0.7706        | -0.70179     | -0.43145     | -0.198835        | 1.11427  | 1.06525  | 1.059287261              | 1.56435041           | 1.38303   | 0.89543  |
| a27           | -0.59024        | -0.87578      | -0.04628      | 1.67718         | -0.80658       | -0.71932     | -0.24036     | 0.960758         | 1.16927  | 1.02696  | 1.59359463               | 1.45703464           | 1.57808   | 0.99178  |
| a28           | -0.91281        | -0.72911      | -0.76103      | -0.71055        | -0.95549       | -0.59534     | -0.47022     | -0.761304        | 1.17693  | 1.02099  | 0.994413872              | 1.25263507           | 1.17728   | 0.99066  |
| a29           | -0.89867        | -0.84712      | -0.94623      | -0.97076        | -0.95487       | -0.72269     | -0.50436     | -0.942033        | 1.16821  | 1.01443  | 0.124504702              | 0.82637255           | 0.52277   | 0.99092  |
| a30           | -0.83365        | 1.4749        | 0.37231       | -0.86328        | -0.86242       | -0.34437     | -0.04417     | -0.82574         | 0.0083   | 0.93463  | 0.263989531              | 1.58092862           | 1.01244   | 0.76727  |
| a31           | -0.75209        | -0.87897      | -0.94781      | -0.86442        | -0.68172       | -0.72658     | -0.50756     | -0.882731        | 1.17775  | 1.02119  | 0.171310746              | 0.97586149           | 0.62894   | 0.99077  |
| a32           | -0.59872        | -0.87879      | -0.52331      | 1.25688         | -0.87282       | -0.72269     | -0.36519     | 0.902483         | 1.09378  | 0.98535  | 1.336038122              | 1.30640548           | 1.3706    | 0.97727  |
| a33           | -0.90814        | -0.82164      | -0.94229      | -0.79512        | -0.94944       | -0.71773     | -0.50009     | -0.838832        | 1.16044  | 1.01658  | 0.346296321              | 1.04994583           | 0.75406   | 0.99059  |
| a34           | 0.41451         | 0.28558       | -0.0139       | -0.38585        | 0.89774        | 0.76668      | -0.23586     | -0.370066        | 0.29095  | 0.24235  | 0.623434591              | 0.29255422           | 0.46181   | 0.32775  |
| a35           | -0.69046        | 0.07468       | -0.54305      | -0.92353        | -0.67024       | 0.42697      | -0.35701     | -0.884528        | 0.17754  | 0.05199  | 0.524152245              | 0.28694313           | 0.41124   | 0.4104   |
| a36           | -0.8051         | -0.88233      | -0.79775      | 0.66546         | -0.90632       | -0.72641     | -0.28647     | 0.341555         | 1.19966  | 0.89771  | 1.339894602              | 0.91711012           | 1.15419   | 0.9816   |
| a37           | -0.81612        | -0.14772      | -0.9411       | -0.9668         | -0.9209        | -0.5964      | -0.47852     | -0.94229         | 0.81479  | 0.90741  | 0.31375397               | 0.58787139           | 0.47946   | 0.96607  |
| a38           | -0.88567        | -0.56439      | -0.9024       | -0.94955        | -0.95239       | -0.6738      | -0.39542     | -0.760277        | 1.06575  | 0.95343  | 0.577033566              | 0.83430909           | 0.74338   | 0.91743  |
| a39           | -0.91055        | -0.86941      | -0.9028       | -0.8466         | -0.95456       | -0.71365     | -0.49428     | -0.837292        | 1.27891  | 1.01316  | 0.783346437              | 1.48022913           | 1.20406   | 1.01712  |

|     |          |          |          |          |          |          |          |           |          |          |             |            |          |          |
|-----|----------|----------|----------|----------|----------|----------|----------|-----------|----------|----------|-------------|------------|----------|----------|
| a40 | -0.60621 | -0.70982 | -0.91899 | -0.37906 | -0.62402 | -0.57674 | -0.48907 | -0.489953 | 0.39847  | 0.58007  | 1.000048912 | 0.87247648 | 0.96683  | 0.61514  |
| a41 | 5.60702  | 1.52834  | -0.93676 | -0.9487  | -0.95719 | -0.71436 | -0.49891 | -0.906349 | -5.8685  | 0.87637  | -1.29327115 | 0.55199944 | -0.30827 | 0.79319  |
| a42 | -0.55137 | -0.67497 | -0.94307 | -0.95153 | -0.87189 | -0.70639 | -0.4797  | -0.927913 | 0.84812  | 0.83602  | -0.3998533  | 0.0672256  | -0.1533  | 0.81488  |
| a43 | -0.69498 | -0.38834 | -0.60149 | -0.8135  | -0.70592 | -0.533   | -0.40146 | -0.776963 | -2.44825 | -1.79542 | -1.05099969 | -0.715956  | -0.90342 | -2.67388 |
| a44 | -0.89047 | 0.17482  | -0.64059 | -0.05945 | -0.9316  | -0.47827 | -0.4247  | 0.181877  | -0.1806  | 0.13434  | -0.09721648 | 0.21413404 | 0.07362  | 0.18671  |
| a45 | -0.8926  | -0.10154 | -0.42656 | -0.87743 | -0.93253 | -0.49474 | 0.38152  | -0.861424 | 0.08085  | -0.19701 | 0.485252865 | 0.32715092 | 0.4152   | 0.34317  |
| a46 | -0.88284 | -0.36145 | -0.21963 | -0.81577 | -0.91795 | -0.52219 | -0.26798 | -0.772856 | -0.48656 | -0.43015 | -1.383467   | -1.3593405 | -1.42294 | -0.4474  |
| a47 | -0.6513  | -0.68222 | 0.38139  | -0.04163 | 0.78017  | -0.49545 | -0.19472 | -0.486359 | -1.16115 | -0.91426 | -0.17402911 | 0.44739919 | 0.16771  | -1.79446 |
| a48 | -0.88864 | 0.18172  | -0.01627 | -0.68085 | -0.92617 | -0.44409 | -0.21914 | -0.67633  | -0.15752 | 0.15461  | -0.1423144  | 0.19820096 | 0.04314  | 0.19331  |
| a49 | -0.42443 | 0.13732  | 2.35308  | 0.00023  | -0.35476 | -0.23969 | 0.57582  | -0.08511  | 0.00995  | 0.12719  | 0.359204083 | 0.26190329 | 0.31841  | 0.21475  |
| a50 | -0.46161 | -0.30837 | 0.59858  | -0.2416  | -0.40299 | -0.36279 | 0.01214  | -0.283039 | -0.42132 | -0.44308 | -1.17814026 | -1.3610059 | -1.32579 | -0.42678 |
| a51 | -0.91168 | 1.24136  | -0.89055 | -0.78296 | -0.9558  | 0.29608  | -0.49013 | -0.747441 | -2.68626 | -1.82637 | -1.2271651  | -0.7701615 | -1.01796 | -2.69039 |
| a52 | 1.42915  | -0.79723 | -0.59715 | 0.08281  | 1.70291  | -0.6375  | -0.33105 | 0.132844  | -0.30202 | -0.49547 | -1.02678663 | -1.3222984 | -1.2318  | -0.43496 |
| a53 | 0.33931  | -0.60986 | -0.6785  | 0.76446  | 0.5565   | -0.57692 | -0.40715 | 0.668613  | 0.28541  | 0.24058  | 0.653828584 | 0.48141078 | 0.58221  | 0.31441  |
| a54 | -0.84213 | 1.48959  | -0.78038 | -0.49078 | -0.93579 | -0.47721 | -0.34859 | -0.528204 | -0.24019 | 0.80028  | -0.47224595 | 0.93641886 | 0.29943  | 0.78998  |
| a55 | -0.56253 | -0.4899  | 0.42957  | 1.10443  | -0.55469 | -0.43328 | -0.13094 | 0.502517  | 1.02253  | 0.96762  | 1.507237655 | 1.53533479 | 1.58073  | 0.97076  |
| a56 | 1.52075  | 3.19271  | 1.53368  | 3.39232  | 1.98427  | 3.54013  | 0.19031  | 2.758551  | 0.48821  | 0.38746  | 0.488087994 | 0.00175293 | 0.23412  | 0.23572  |
| a57 | 0.7433   | -0.33403 | 0.06508  | 0.08904  | 1.22285  | -0.14476 | -0.04974 | 0.009876  | -0.21699 | -0.44044 | -1.08880728 | -1.3586354 | -1.2818  | -0.38467 |
| a58 | -0.87196 | -0.25352 | -0.22714 | -0.76853 | -0.92074 | -0.11908 | -0.2534  | -0.639106 | -0.25326 | -0.36455 | -1.05128144 | -1.3550947 | -1.26189 | -0.43937 |
| a59 | 1.77929  | -0.14347 | 0.11207  | -0.55159 | 2.064    | 0.22311  | -0.18547 | -0.561834 | -0.25574 | -0.28866 | -1.16803241 | -1.5046737 | -1.40151 | -0.38228 |
| a60 | -0.71887 | -0.86269 | 0.15156  | -0.58554 | -0.76424 | -0.70232 | 0.53682  | -0.55824  | -0.67547 | -0.65899 | -1.06094905 | -1.2700133 | -1.2188  | -0.98282 |
| a61 | 0.89865  | 1.43032  | 0.76878  | 0.01493  | 1.31405  | 1.81874  | 0.23666  | -0.238883 | 0.33806  | 0.09948  | 0.725464019 | 0.12500179 | 0.41661  | 0.41874  |

<sup>a</sup> See Table S4 for the definition of the descriptors.



**Table S9.** Computationally derived steric and MO energy descriptors for the sulfinylamine fragments.<sup>a</sup>

| Sulfinylamine | Sterimol Parameters |          |          |          |          |          |          |              |          | Buried Volume |            |          | MO Energies |          |          |          |
|---------------|---------------------|----------|----------|----------|----------|----------|----------|--------------|----------|---------------|------------|----------|-------------|----------|----------|----------|
|               | Bmin S              | Bmax S   | LS       | Bmin N   | Bmax N   | LN       | Bmin O   | B (Z) Bmax O | LO       | BV_S          | B (Z) BV_N | BV_O     | h1a         | ha       | la       | l1a      |
| b1            | -0.67309            | 0.75368  | 0.334997 | -0.17542 | 0.09619  | 0.636353 | -1.31233 | 1.18774361   | -0.02116 | -0.1306       | 0.116336   | 0.474738 | 0.966901    | 0.779285 | 0.132279 | -1.15761 |
| b2            | 4.136598            | -1.03103 | -0.325   | 3.566033 | -0.63396 | -0.51582 | 0.076029 | -0.8360958   | -0.37663 | -0.17317      | 0.521788   | -1.21827 | -1.12692    | -1.65483 | 2.274673 | 2.72881  |
| b3            | 0.964252            | 3.903168 | 1.98498  | 1.608963 | 3.736181 | 2.416977 | 1.686529 | 4.96557715   | 1.723873 | -0.00291      | 0.681836   | 1.672409 | 0.412187    | 0.846445 | -1.51186 | -0.7194  |
| b4            | -0.57075            | 0.036296 | -0.385   | -0.46323 | 0.149877 | -0.51582 | 0.520305 | -0.1614826   | -0.50589 | -0.10932      | 0.100331   | 0.452559 | 0.458471    | 0.237604 | -0.52538 | -0.33075 |
| b5            | -0.46842            | -0.39238 | -0.445   | 0.285063 | 0.235776 | -0.2365  | 0.686908 | 0.48421849   | -0.40894 | -0.27958      | 0.020308   | -1.15912 | 0.814234    | 0.314807 | 0.383913 | -0.32758 |
| b6            | -0.77542            | -0.03369 | 0.274997 | 1.148476 | -0.26888 | 0.042811 | -0.03504 | -0.6529865   | 0.657465 | 0.869636      | 1.140637   | -0.47896 | 1.029074    | 0.190528 | 1.443581 | 0.466359 |
| b7            | -0.57075            | -0.54111 | 0.784992 | -0.46323 | -0.53732 | 0.845838 | -0.09057 | 0.07945061   | 0.722095 | -0.15189      | 0.094996   | 0.437773 | -1.60012    | -0.67817 | -2.04019 | -0.79831 |
| b8            | -0.05909            | 1.331086 | 0.394996 | 1.781646 | 0.600849 | 0.880752 | -1.31233 | 0.86007438   | -0.05347 | -0.10932      | 0.089661   | 0.496917 | -0.00022    | -0.17101 | -0.73089 | -0.18323 |
| b9            | 1.066586            | -0.33114 | 1.774982 | 0.285063 | -0.56953 | 1.998007 | -0.09057 | -0.084384    | 1.756188 | -0.15189      | -0.070386  | -1.19609 | 0.080602    | 0.616718 | 1.349343 | -0.04086 |
| b10           | 1.066586            | -0.44488 | -0.055   | -0.80859 | 1.019609 | -0.55073 | -1.20126 | -0.2193066   | -0.21505 | 1.997567      | 0.212364   | 1.066181 | -0.6254     | 0.164166 | -0.55645 | -0.4989  |
| b11           | -0.57075            | -0.69858 | -0.415   | -0.46323 | -0.56953 | -0.58564 | -0.03504 | -0.2964053   | -0.50589 | -0.17317      | 0.070989   | 0.43038  | 0.373502    | -0.36433 | -0.75696 | -0.60161 |
| b12           | 0.554917            | -0.84731 | 0.394996 | -0.17542 | -0.48363 | 0.426868 | 0.464771 | -0.6529865   | 0.26968  | 0.124777      | -0.10773   | -1.16651 | -0.175      | -0.72336 | -1.13591 | -1.65015 |
| b13           | -0.62192            | -1.29349 | -2.93497 | -1.72957 | -2.11572 | -2.08695 | -1.31233 | -1.6070822   | -2.8326  | -2.59928      | -3.999542  | -2.97781 | -3.03492    | -3.36272 | 0.915251 | 3.05162  |
| b14           | -0.57075            | -0.60235 | -0.385   | -0.46323 | -0.52658 | -0.51582 | 0.187098 | -0.4216906   | -0.40894 | -0.15189      | 0.097664   | 0.363843 | 0.076457    | 0.430299 | 0.315741 | 0.136806 |
| b15           | -0.77542            | 1.322337 | 0.094999 | -0.40567 | 1.706805 | -0.27142 | 0.742443 | 0.64805311   | 0.398941 | -0.15189      | 0.102999   | 0.363843 | 0.997987    | 0.254551 | -0.25169 | -0.03888 |
| b16           | -0.57075            | -0.73358 | 0.544994 | -0.52079 | -0.45142 | 0.461782 | -0.20164 | -0.4795146   | 0.592834 | -0.1306       | 0.094996   | 0.422987 | -1.08064    | -0.64176 | -1.21812 | -0.51754 |
| b17           | 1.066586            | -0.23491 | -0.415   | -0.34811 | -0.00045 | -0.51582 | -1.20126 | -0.3831413   | -0.57052 | 2.91268       | 0.449767   | 0.896141 | 0.605612    | 0.483651 | 0.392936 | -0.13802 |
| b18           | -0.72425            | 1.05988  | -0.385   | -0.46323 | 0.461262 | -0.51582 | 0.076029 | 0.05053862   | -0.40894 | -0.19445      | 0.70851    | 0.393415 | -0.93902    | -0.73215 | -1.75146 | -1.5173  |
| b19           | -0.21259            | 0.001302 | 0.094999 | 0.227502 | 0.182089 | -0.16667 | 0.686908 | 0.17582392   | 0.301995 | -0.19445      | 0.820543   | 0.349057 | 1.08641     | 0.639941 | -0.1765  | -0.12295 |
| b20           | -0.77542            | 1.602292 | -0.385   | -0.0603  | 1.255833 | -0.55073 | 1.297787 | 1.41903954   | 0.140418 | -0.15189      | 0.897899   | 0.326878 | 0.825287    | 0.896659 | 0.439052 | 0.444944 |
| b21           | -0.67309            | 1.156114 | 0.334997 | 0.572868 | 1.191408 | 0.077726 | 1.186718 | 0.35893319   | 0.915988 | -0.1306       | 0.124338   | 0.363843 | 1.446318    | 2.242388 | 0.242557 | 0.216121 |
| b22           | 1.373587            | 0.849914 | 0.724993 | 1.954329 | 1.008872 | 0.53161  | 3.185959 | 0.02162663   | 1.206826 | -0.1306       | 0.116336   | 0.415594 | -0.09348    | -0.13084 | -0.6938  | -0.2217  |
| b23           | -0.46842            | 0.578708 | 0.244998 | -0.86615 | -0.11856 | 0.147554 | 0.853512 | -0.113296    | 0.26968  | -0.15189      | 0.076324   | 0.445166 | 0.785911    | 0.666304 | -0.05519 | -0.2209  |
| b24           | 1.117752            | -0.39238 | 1.354986 | 0.285063 | -0.56953 | 1.544122 | -1.20126 | -0.2096693   | 1.303773 | -0.17317      | -0.070386  | -1.19609 | 0.134484    | 0.435948 | 1.446588 | 0.019817 |
| b25           | 1.782922            | -0.27865 | 2.464975 | 0.457746 | -0.53732 | 2.801033 | -1.20126 | -0.200032    | 2.499443 | -0.17317      | -0.105063  | -1.21827 | 1.23286     | 0.549557 | 1.932812 | 0.571054 |

<sup>a</sup> See Table S4 for the definition of the descriptors.

**Table S10.** Computationally derived steric and MO coefficients descriptors for the sulfinylamine fragments.<sup>a</sup>

| Sulfinylamine | MO coefficients         |                 |                       |                         |                         |                 |                       |                   |                   |                 |                 |                   |
|---------------|-------------------------|-----------------|-----------------------|-------------------------|-------------------------|-----------------|-----------------------|-------------------|-------------------|-----------------|-----------------|-------------------|
|               | B (Z) $\alpha$ homo-1 S | $\alpha$ homo S | B (Z) $\alpha$ lumo S | B (Z) $\alpha$ lumo+1 S | B (Z) $\alpha$ homo-1 N | $\alpha$ homo N | B (Z) $\alpha$ lumo N | $\alpha$ lumo+1 N | $\alpha$ homo-1 O | $\alpha$ homo O | $\alpha$ lumo O | $\alpha$ lumo+1 O |
| b1            | -0.5130459              | 0.210075        | -0.610003003          | -0.326761218            | -0.391559033            | -0.33432972     | -0.430852443          | -0.394851         | -0.38999026       | -0.07779        | -0.13593        | -0.3962751        |
| b2            | 2.77584643              | 0.911877        | 1.645967794           | 1.570770966             | 2.794968991             | 2.899153814     | 1.824683085           | 0.4846183         | 2.77991722        | 1.398511        | 0.638757        | 0.83394072        |
| b3            | -0.5517165              | 0.55825         | -1.593742668          | 0.213511278             | -0.406158034            | -0.41957159     | -1.415000042          | 0.7813041         | -0.43638011       | 0.01054         | -0.7756         | -0.1588118        |
| b4            | 0.70979578              | -0.61876        | -0.508516793          | -0.316403662            | 0.087741972             | -0.7307136      | -0.488796528          | -0.340267         | 0.19235045        | -0.39954        | -0.07343        | -0.3845753        |
| b5            | 0.83170267              | -0.00057        | -0.417314518          | -0.263076248            | -0.150478222            | 0.143797977     | -0.821354995          | -0.285447         | 0.83637979        | 0.046744        | 0.647011        | -0.3743921        |
| b6            | -0.5920378              | -1.82141        | 1.543669694           | -0.258597305            | -0.435651963            | -1.39129203     | 1.830770596           | -0.271566         | -0.46135167       | -1.09366        | 0.756669        | -0.3561924        |
| b7            | -0.5988759              | 0.276519        | -1.131777439          | -0.059704243            | -0.437328875            | -0.00993195     | -1.07342304           | 0.3968596         | -0.47546603       | 0.057686        | -0.53506        | -0.2004112        |
| b8            | -0.0532423              | 0.029122        | -0.470357978          | -0.283091524            | -0.203942134            | -0.1712103      | -0.486316431          | -0.311563         | -0.40617736       | -0.88978        | -3.4805         | 3.54895212        |
| b9            | -0.5842565              | -1.91209        | 1.675737082           | -0.332079963            | -0.425886415            | -1.56380094     | 1.824457622           | -0.415556         | -0.45858802       | -1.1167         | 0.803834        | -0.3967084        |
| b10           | -0.289039               | -0.37782        | 0.45627878            | -0.121429676            | -0.110725536            | 0.309126691     | 0.068774379           | 0.0997033         | -0.21351141       | -0.41707        | 0.657623        | -0.2675769        |
| b11           | -0.0610236              | 0.545123        | -0.520965768          | -0.267975092            | -0.052921381            | 0.285376798     | -0.469857606          | -0.293682         | -0.06220153       | 0.271357        | -0.12767        | -0.3804587        |
| b12           | -0.4573979              | -0.79729        | 0.215688804           | -0.325641482            | -0.375776328            | 0.233826642     | -0.417099178          | -0.379088         | -0.38890454       | -0.48387        | 0.748416        | -0.3694088        |
| b13           | 3.11751584              | 2.559849        | 2.314694262           | 3.998078125             | 3.618530236             | 2.703631437     | 2.226458806           | 4.0377888         | 3.47250786        | 3.585391        | 1.596793        | 1.87674256        |
| b14           | -0.5962821              | 0.574608        | -0.511493722          | -0.316403662            | -0.436342456            | 0.150794069     | -0.36839909           | -0.338149         | -0.47704526       | 0.22768         | -0.16128        | -0.3860919        |
| b15           | -0.3406785              | 0.105663        | -0.528543405          | -0.316683596            | -0.325271674            | -0.26087075     | -0.460839071          | -0.313445         | -0.27727279       | -0.09114        | -0.15184        | -0.3791587        |
| b16           | -0.5960463              | 0.523917        | -0.654386306          | -0.317383431            | -0.436638382            | 0.342266077     | -0.681342244          | -0.328268         | -0.47714396       | 0.254811        | -0.16305        | -0.3819753        |
| b17           | -0.3286529              | -0.5513         | 0.765338119           | -0.323961879            | -0.122957132            | 0.623582643     | 0.38352124            | -0.352737         | -0.25891425       | -0.52737        | 0.907597        | -0.3694088        |
| b18           | -0.4439575              | 0.356494        | -0.731515825          | -0.193512665            | -0.367293125            | 0.150794069     | -0.899590784          | -0.020289         | -0.40903971       | 0.146375        | -0.21198        | -0.2771101        |
| b19           | 0.19269362              | -0.23928        | -0.581316234          | -0.317383431            | -0.164978582            | -0.55157681     | -0.568836024          | -0.33862          | -0.10128745       | -0.23916        | -0.13357        | -0.3767754        |
| b20           | -0.4163692              | 0.411831        | -0.614062451          | -0.319063035            | -0.368674111            | -0.16439831     | -0.45610434           | -0.367324         | -0.40114356       | 0.088198        | -0.19016        | -0.3858753        |
| b21           | 1.8640206               | -1.6237         | -0.506893013          | -0.317943299            | 0.438512578             | -1.48224123     | -0.381926892          | -0.321915         | 0.91386071        | -1.02953        | -0.13887        | -0.3811087        |
| b22           | 0.06842876              | -0.13244        | -0.56724348           | -0.317243464            | -0.181155854            | -0.50941614     | -0.439194588          | -0.328268         | -0.16149556       | -0.1824         | -0.18722        | -0.3793754        |
| b23           | 0.06842876              | -0.13244        | -0.56724348           | -0.317243464            | -0.181155854            | -0.50941614     | -0.439194588          | -0.328268         | -0.16149556       | -0.1824         | -0.18722        | -0.3793754        |
| b24           | -0.5851997              | -1.91027        | 1.68250283            | -0.336558906            | -0.42460407             | -1.55864592     | 1.828966889           | -0.430143         | -0.45937763       | -1.11546        | 0.787916        | -0.3984418        |
| b25           | -0.6198618              | -1.91936        | 1.671948264           | -0.348176164            | -0.454295283            | -1.58147528     | 1.864139174           | -0.460729         | -0.47980891       | -1.12124        | 0.718938        | -0.4038583        |

<sup>a</sup> See Table S4 for the definition of the descriptors.

**Table S11.** Computationally derived steric and MO energy descriptors for the sulfinylamine fragments.<sup>a</sup>

| Sulfinylamine | Fukui indices and Mulliken charges |                            |                |                                  |                                  |                        |                             |                            |                |
|---------------|------------------------------------|----------------------------|----------------|----------------------------------|----------------------------------|------------------------|-----------------------------|----------------------------|----------------|
|               | fukui<br>electrophilic<br>S        | fukui<br>nucleophilic<br>S | fukui ave<br>S | fukui<br>electrophilic<br>c<br>N | B (Z) fukui<br>nucleophilic<br>N | B(Z)<br>fukui ave<br>N | fukui<br>electrophilic<br>O | fukui<br>nucleophilic<br>O | fukui ave<br>O |
|               | b1                                 | -0.15678348                | -0.6036247     | -0.41551                         | -0.2084029                       | -0.2812047             | -0.26439                    | -0.2315194                 | -0.696205104   |
| b2            | 0.22076954                         | 1.81656882                 | 1.088105       | 1.41863853                       | 1.7187675                        | 1.708437               | 0.83888262                  | 1.591110516                | 1.145035       |
| b3            | -0.0643942                         | -1.6066313                 | -0.87774       | -0.3944712                       | -1.1187363                       | -0.77442               | -0.2345956                  | -1.477588665               | -0.62576       |
| b4            | -0.21789673                        | -0.4402034                 | -0.36998       | -0.4913602                       | -0.3936764                       | -0.49754               | -0.39994143                 | -0.555615184               | -0.48585       |
| b5            | 0.05679449                         | -0.1896496                 | -0.06197       | 0.02317903                       | -0.6370461                       | -0.28281               | 0.08157116                  | -0.027388073               | 0.057457       |
| b6            | -1.35899984                        | 1.25907263                 | -0.22355       | -1.3581146                       | 1.3083732                        | -0.25563               | -1.06354483                 | 1.168670717                | -0.509         |
| b7            | -0.01762168                        | -0.9723189                 | -0.51739       | -0.0439763                       | -0.8695632                       | -0.4343                | -0.03562921                 | -0.879086301               | -0.28875       |
| b8            | 0.04990716                         | -0.3404098                 | -0.14488       | -0.2826518                       | -0.35311                         | -0.34537               | -0.10793446                 | -0.475368177               | -0.22741       |
| b9            | -2.03652908                        | 0.5238236                  | -1.04429       | -1.3008987                       | 0.9543599                        | -0.38449               | -1.43924769                 | 0.768657514                | -0.92932       |
| b10           | 0.0717249                          | 0.19689321                 | 0.148844       | 0.09666339                       | -0.0640958                       | 0.031755               | -0.33306307                 | 0.392016843                | -0.1517        |
| b11           | 0.37080482                         | -0.2377733                 | 0.116037       | 0.15553583                       | -0.3113538                       | -0.04618               | 0.27650366                  | -0.391219178               | 0.106474       |
| b12           | -0.30865853                        | 0.00844296                 | -0.19519       | 0.22235138                       | -0.7658837                       | -0.21587               | -0.337866                   | 0.280120352                | -0.18867       |
| b13           | 3.24822254                         | 3.40576414                 | 3.872778       | 3.64166784                       | 3.302658                         | 3.867292               | 3.69024566                  | 3.266798892                | 3.932584       |
| b14           | 0.31608358                         | -0.3029542                 | 0.046732       | 0.06503963                       | -0.2481537                       | -0.07442               | 0.20379213                  | -0.416838311               | 0.040453       |
| b15           | -0.02866028                        | -0.5036845                 | -0.28065       | -0.2342286                       | -0.3729289                       | -0.32372               | -0.19718783                 | -0.571026078               | -0.32745       |
| b16           | 0.19331457                         | -0.5114218                 | -0.14114       | 0.1824447                        | -0.540592                        | -0.13609               | 0.1874099                   | -0.57571635                | -0.01972       |
| b17           | -0.13892831                        | 0.2781642                  | 0.054922       | 0.13761074                       | -0.0014181                       | 0.087172               | -0.5030232                  | 0.593462058                | -0.22869       |
| b18           | -0.02866028                        | -0.7205048                 | -0.39349       | -0.1943219                       | -1.0322352                       | -0.60626               | 0.05643918                  | -0.671216596               | -0.15325       |
| b19           | -0.28035443                        | -0.6423991                 | -0.51559       | -0.7454546                       | -0.6100308                       | -0.76079               | -0.23043112                 | -0.630620123               | -0.3718        |
| b20           | 0.05865785                         | -0.5718841                 | -0.25968       | -0.385891                        | -0.4945412                       | -0.47734               | -0.01321067                 | -0.618795908               | -0.19372       |
| b21           | -0.88332597                        | -0.5074359                 | -0.83526       | -1.149831                        | -0.3555475                       | -0.90001               | -1.00818771                 | -0.537208823               | -0.96927       |
| b22           | 0.0699559                          | -0.3559723                 | -0.14001       | -0.1416511                       | -0.3851453                       | -0.27034               | -0.15367119                 | -0.461139704               | -0.25996       |
| b23           | -0.1905597                         | -0.597089                  | -0.43395       | -0.4400485                       | -0.3535162                       | -0.44602               | -0.32866642                 | -0.669640034               | -0.4623        |
| b24           | -1.83710316                        | 0.69571484                 | -0.82588       | -1.2233154                       | 1.0410641                        | -0.29447               | -1.32567492                 | 0.882485293                | -0.80436       |
| b25           | -1.98244467                        | 0.48393546                 | -1.03007       | -0.529674                        | 1.0529613                        | 0.153826               | -1.11846663                 | 0.761090016                | -0.67374       |

<sup>a</sup> See Table S4 for the definition of the descriptors.

## Optimized structures

### Me

E(UPW6B95D3) = -39.8998234998

Charge = 0 Multiplicity = 2

Single point geometry:

|   |          |          |          |
|---|----------|----------|----------|
| C | -1.36514 | 0.14095  | 0.21838  |
| H | -0.85706 | -0.75755 | -0.09246 |
| H | -0.85709 | 0.85943  | 0.84108  |
| H | -2.38124 | 0.32102  | -0.09335 |

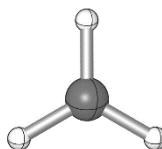

### PhNSO (Z)

E(RPW6B95D3) = -760.743096375

Charge = 0 Multiplicity = 1

Single point geometry:

|   |          |          |          |
|---|----------|----------|----------|
| S | 2.78324  | 2.18439  | 0.89753  |
| N | 2.25117  | 0.82538  | 0.55561  |
| O | 1.87357  | 3.30968  | 1.01858  |
| C | -1.41101 | 0.48208  | 0.0501   |
| C | -1.47733 | -0.87741 | -0.23923 |
| C | -0.31541 | -1.64395 | -0.25998 |
| C | 0.90724  | -1.05158 | 0.00766  |
| C | 0.97679  | 0.315    | 0.29861  |
| C | -0.19234 | 1.08676  | 0.31974  |
| H | -2.31551 | 1.07692  | 0.06586  |
| H | -2.43416 | -1.33925 | -0.44825 |
| H | -0.3646  | -2.70181 | -0.48453 |
| H | 1.82527  | -1.62561 | -0.00193 |
| H | -0.14018 | 2.14217  | 0.54482  |

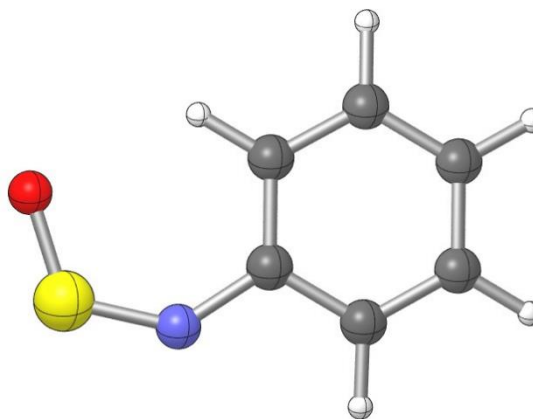

### PhNSO (E)

E(RPW6B95D3) = -760.734055004

Charge = 0 Multiplicity = 1

Single point geometry:

|   |          |          |          |
|---|----------|----------|----------|
| S | 2.71576  | 2.13425  | 0.42583  |
| N | 2.27334  | 0.74647  | 0.81999  |
| O | 4.00534  | 2.49894  | 0.9593   |
| C | -1.36137 | 0.51119  | 0.07414  |
| C | -1.44464 | -0.82126 | -0.31441 |
| C | -0.30326 | -1.61776 | -0.30651 |
| C | 0.91699  | -1.08666 | 0.08226  |
| C | 1.00417  | 0.25822  | 0.44387  |
| C | -0.14327 | 1.05497  | 0.45699  |
| H | -2.25018 | 1.12931  | 0.09164  |
| H | -2.39836 | -1.24215 | -0.60639 |
| H | -0.3654  | -2.65931 | -0.59569 |
| H | 1.81382  | -1.6929  | 0.10059  |
| H | -0.08581 | 2.08275  | 0.79649  |

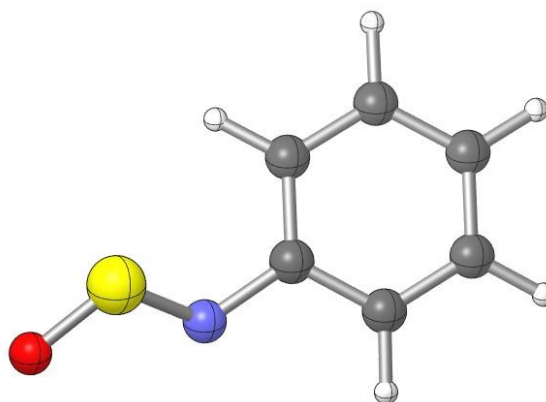

### TSA

E(UPW6B95D3) = -800.648249287

Charge = 0 Multiplicity = 2

Single point geometry:

|   |          |          |          |
|---|----------|----------|----------|
| C | -0.85031 | -4.21169 | 0.36239  |
| C | -0.53608 | -3.18201 | -0.51304 |
| C | -0.75259 | -1.85277 | -0.12236 |
| C | -1.28468 | -1.58199 | 1.14437  |
| C | -1.60099 | -2.61849 | 2.00627  |
| C | -1.38346 | -3.93784 | 1.6178   |
| H | -0.67968 | -5.23723 | 0.05926  |
| H | -0.12789 | -3.39814 | -1.48969 |
| H | -1.44084 | -0.54837 | 1.42739  |
| H | -2.01465 | -2.39959 | 2.98266  |
| H | -1.62858 | -4.74955 | 2.29118  |
| N | -0.45661 | -0.74549 | -0.91663 |
| S | 0.07231  | -0.59342 | -2.31924 |
| O | 0.25882  | -1.7763  | -3.14563 |
| C | 2.62155  | -0.32412 | -1.67416 |
| H | 2.53917  | 0.53293  | -1.02395 |
| H | 2.6325   | -1.31411 | -1.24204 |
| H | 2.97132  | -0.18984 | -2.68627 |

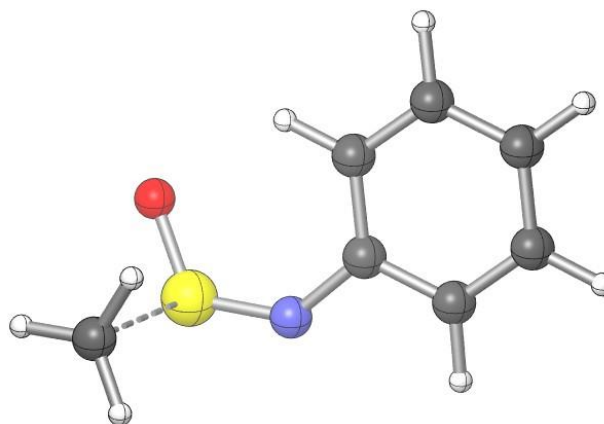

### TSB

E(UPW6B95D3) = -800.634378242

Charge = 0 Multiplicity = 2

Single point geometry:

|   |          |          |          |
|---|----------|----------|----------|
| C | -1.53316 | 3.10599  | -0.35349 |
| C | -0.85977 | 2.04349  | -0.94344 |
| C | -0.99649 | 0.76166  | -0.40624 |
| C | -1.78763 | 0.55962  | 0.72651  |
| C | -2.46202 | 1.62464  | 1.30218  |
| C | -2.33656 | 2.90194  | 0.76254  |
| H | -1.42609 | 4.10001  | -0.76958 |
| H | -0.22756 | 2.20339  | -1.80496 |
| H | -1.86396 | -0.44078 | 1.13499  |
| H | -3.08207 | 1.46007  | 2.17448  |
| H | -2.85872 | 3.73575  | 1.21478  |
| N | -0.35268 | -0.38385 | -0.93053 |
| S | -0.04919 | -0.71671 | -2.39965 |
| O | -0.04834 | 0.3756   | -3.37371 |
| C | 1.56948  | -0.20505 | 0.25588  |
| H | 1.11747  | -0.18383 | 1.2357   |
| H | 2.03625  | -1.12106 | -0.07263 |
| H | 1.88994  | 0.7276   | -0.18457 |

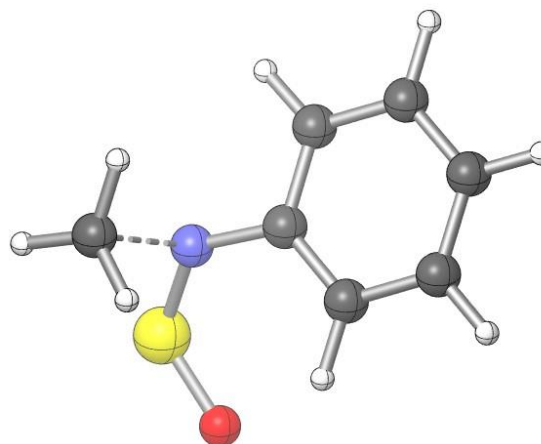

**10a**

E(UPW6B95D3) = -800.685602803

Charge = 0 Multiplicity = 2

Single point geometry:

|   |          |          |          |
|---|----------|----------|----------|
| S | 2.58905  | 2.24412  | 1.59679  |
| N | 2.25952  | 0.77765  | 1.01335  |
| O | 1.84984  | 3.37927  | 1.01432  |
| C | -1.2663  | 0.55357  | -0.07349 |
| C | -1.31088 | -0.80335 | -0.39958 |
| C | -0.17212 | -1.59752 | -0.23907 |
| C | 0.99244  | -1.04268 | 0.24241  |
| C | 1.06232  | 0.33893  | 0.56831  |
| C | -0.10615 | 1.13133  | 0.40098  |
| H | -2.15292 | 1.16356  | -0.19356 |
| H | -2.22786 | -1.23981 | -0.77407 |
| H | -0.20632 | -2.65065 | -0.48789 |
| H | 1.88665  | -1.63758 | 0.38091  |
| H | -0.0764  | 2.18283  | 0.64588  |
| C | 4.24613  | 2.35226  | 0.95196  |
| H | 4.82991  | 1.51149  | 1.32013  |
| H | 4.18385  | 2.34451  | -0.13607 |
| H | 4.6603   | 3.29382  | 1.30841  |

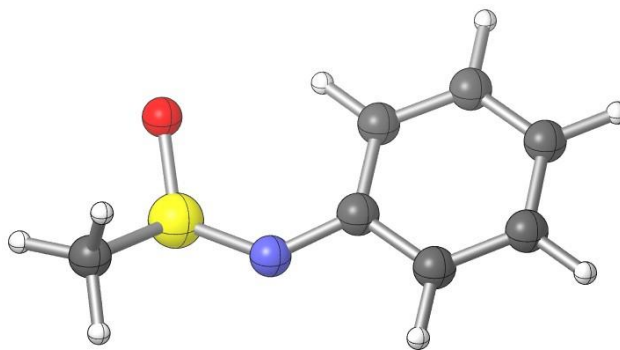**10b**

E(UPW6B95D3) = -800.681894425

Charge = 0 Multiplicity = 2

Single point geometry:

|   |          |          |            |
|---|----------|----------|------------|
| C | -2.45706 | 2.14891  | -0.74143   |
| C | -1.39393 | 1.33156  | -1.05421   |
| C | -0.31006 | 1.1854   | -0.14128   |
| C | -0.3746  | 1.88456  | 1.09627    |
| C | -1.44198 | 2.70378  | 1.38827    |
| C | -2.48793 | 2.84393  | 0.47218    |
| H | -3.27985 | 2.24759  | -1.43812   |
| H | -1.39695 | 0.77563  | -1.98386   |
| H | 0.44832  | 1.75599  | 1.7882     |
| H | -1.47275 | 3.23662  | 2.32998    |
| H | -3.33016 | 3.48226  | 0.70571    |
| N | 0.79433  | 0.44546  | -0.34985 q |
| S | 0.99949  | -0.39981 | -1.75539   |
| O | 2.17508  | -1.25923 | -1.5686    |
| C | 1.54411  | 0.97418  | -2.76088   |
| H | 0.74082  | 1.70394  | -2.85902   |
| H | 2.41543  | 1.4117   | -2.27306   |
| H | 1.81128  | 0.57044  | -3.73682   |

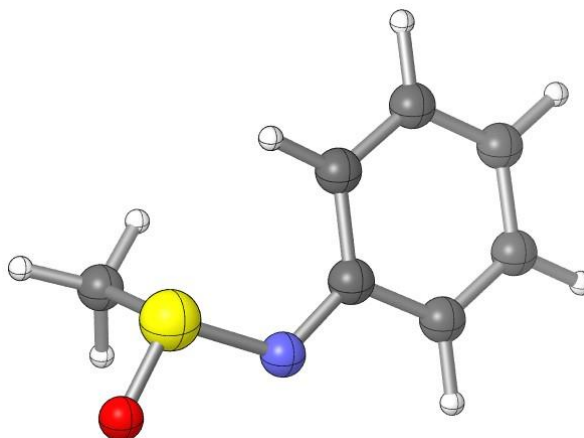**11a**

E(UPW6B95D3) = -800.709415754

Charge = 0 Multiplicity = 2

Single point geometry:

|   |          |          |          |
|---|----------|----------|----------|
| C | -2.04929 | 2.27949  | -0.89608 |
| C | -0.88952 | 1.5375   | -1.05029 |
| C | -0.07423 | 1.27401  | 0.05609  |
| C | -0.44583 | 1.76556  | 1.30932  |
| C | -1.61429 | 2.505    | 1.45014  |
| C | -2.42171 | 2.76994  | 0.35254  |
| H | -2.67104 | 2.47105  | -1.76203 |
| H | -0.62057 | 1.16044  | -2.02832 |
| H | 0.17513  | 1.5769   | 2.17484  |
| H | -1.88764 | 2.87723  | 2.42989  |
| H | -3.32955 | 3.3486   | 0.46531  |
| N | 1.09352  | 0.50023  | -0.07352 |
| S | 1.89751  | 0.30312  | -1.50118 |
| O | 1.91303  | 1.57038  | -2.25654 |
| C | 1.73128  | -0.08314 | 1.09939  |
| H | 2.23609  | 0.67718  | 1.70022  |
| H | 0.98912  | -0.59776 | 1.70979  |
| H | 2.47483  | -0.80965 | 0.77058  |

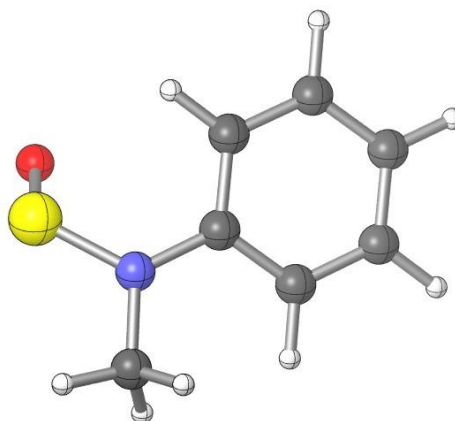

### 11b

E(UPW6B95D3) = -800.711209470

Charge = 0 Multiplicity = 2

Single point geometry:

|   |          |          |          |
|---|----------|----------|----------|
| S | 2.58705  | 2.30805  | 0.37207  |
| N | 2.30894  | 0.69403  | 0.63692  |
| O | 3.76475  | 2.69803  | 1.16968  |
| C | -1.37621 | 0.4785   | 0.34222  |
| C | -1.5362  | -0.78999 | -0.20573 |
| C | -0.41124 | -1.56379 | -0.46355 |
| C | 0.86178  | -1.07755 | -0.19553 |
| C | 1.02164  | 0.19783  | 0.3524   |
| C | -0.11195 | 0.96973  | 0.63112  |
| H | -2.24333 | 1.08717  | 0.56709  |
| H | -2.52574 | -1.17321 | -0.41939 |
| H | -0.51927 | -2.55592 | -0.88444 |
| H | 1.72752  | -1.68727 | -0.41716 |
| H | -0.00353 | 1.94016  | 1.09925  |
| C | 3.45291  | -0.20304 | 0.69827  |
| H | 3.21942  | -1.03832 | 1.35789  |
| H | 3.72106  | -0.58504 | -0.2906  |
| H | 4.29782  | 0.34216  | 1.11288  |

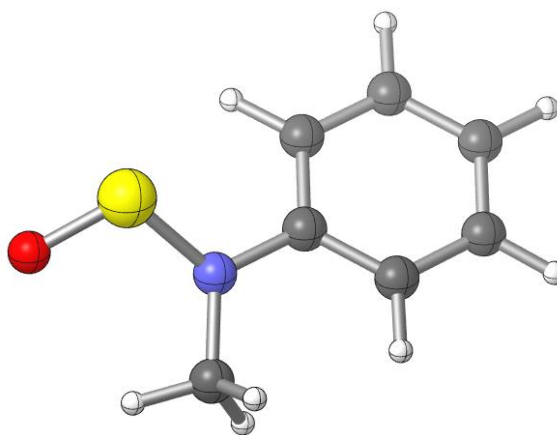

## X-Ray crystallographic data

### *N*-Phenylcyclohexanesulfinamide (1a)

CCDC 2170582

Bond precision: C-C = 0.0023 Å Wavelength = 1.54184  
Cell: a = 6.1241(2) b = 8.1468(2) c = 11.8684(4)  
 $\alpha = 95.121(3)$   $\beta = 91.181(3)$   $\gamma = 105.039(3)$

Temperature: 100 K

|                                     | Calculated                          | Reported                            |
|-------------------------------------|-------------------------------------|-------------------------------------|
| Volume                              | 568.98(3)                           | 568.98(3)                           |
| Space group                         | P -1                                | P -1                                |
| Hall group                          | -P 1                                | -P 1                                |
| Moiety formula                      | C <sub>12</sub> H <sub>17</sub> NOS | C <sub>12</sub> H <sub>17</sub> NOS |
| Sum formula                         | C <sub>12</sub> H <sub>17</sub> NOS | C <sub>12</sub> H <sub>17</sub> NOS |
| Mr                                  | 223.33                              | 223.32                              |
| D <sub>x</sub> , g cm <sup>-3</sup> | 1.304                               | 1.304                               |
| Z                                   | 2                                   | 2                                   |
| Mu (mm <sup>-1</sup> )              | 2.298                               | 2.298                               |
| F <sub>000</sub>                    | 240.0                               | 240.0                               |
| F <sub>000</sub> '                  | 241.23                              |                                     |
| h,k,l <sub>max</sub>                | 7,10,14                             | 7,10,14                             |
| N <sub>ref</sub>                    | 2372                                | 2266                                |
| T <sub>min</sub> , T <sub>max</sub> | 0.750, 0.867                        | 0.491, 1.000                        |
| T <sub>min</sub> '                  | 0.633                               |                                     |

Correction method = # Reported T Limits: T<sub>min</sub> = 0.491 T<sub>max</sub> = 1.000 AbsCorr = GAUSSIAN

Data completeness = 0.955

Theta(max) = 75.928

R(reflections) = 0.0380(2127)

wR2(reflections) = 0.0985( 2266)

S = 1.048

N<sub>par</sub> = 139

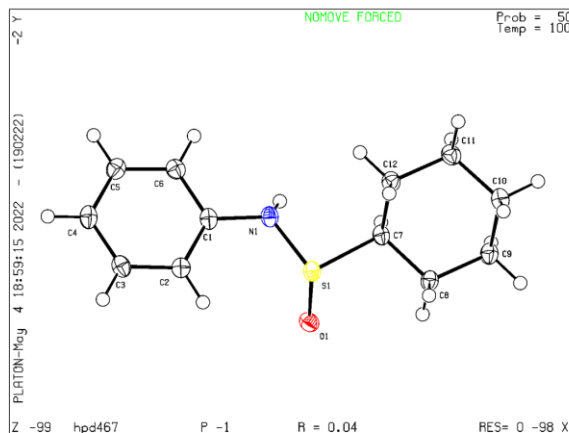



# N-Phenyltetrahydro-2H-pyran-4-sulfonamide (1n)

CCDC 2170572

Bond precision: C-C = 0.0019 Å Wavelength = 1.54184

Cell: a = 5.99937(10) b = 7.77287(15) c = 11.90456(17)

$\alpha = 90.8904(14)$   $\beta = 95.3034(13)$   $\gamma = 100.9668(15)$

Temperature: 100 K

|                                     | Calculated                                        | Reported                                          |
|-------------------------------------|---------------------------------------------------|---------------------------------------------------|
| Volume                              | 542.355(16)                                       | 542.355(16)                                       |
| Space group                         | P -1                                              | P -1                                              |
| Hall group                          | -P 1                                              | -P 1                                              |
| Moiety formula                      | C <sub>11</sub> H <sub>15</sub> NO <sub>2</sub> S | C <sub>11</sub> H <sub>15</sub> NO <sub>2</sub> S |
| Sum formula                         | C <sub>11</sub> H <sub>15</sub> NO <sub>2</sub> S | C <sub>11</sub> H <sub>15</sub> NO <sub>2</sub> S |
| Mr                                  | 225.30                                            | 225.30                                            |
| D <sub>x</sub> , g cm <sup>-3</sup> | 1.380                                             | 1.380                                             |
| Z                                   | 2                                                 | 2                                                 |
| Mu (mm <sup>-1</sup> )              | 2.489                                             | 2.489                                             |
| F000                                | 240.0                                             | 240.0                                             |
| F000'                               | 241.30                                            |                                                   |
| h,k,l <sub>max</sub>                | 7,9,14                                            | 7,9,14                                            |
| N <sub>ref</sub>                    | 2265                                              | 2156                                              |
| T <sub>min</sub> , T <sub>max</sub> | 0.714, 0.859                                      | 0.367, 1.000                                      |
| T <sub>min</sub> '                  | 0.558                                             |                                                   |

Correction method = # Reported T Limits: T<sub>min</sub>=0.367 T<sub>max</sub>=1.000 AbsCorr = GAUSSIAN

Data completeness= 0.952

Theta(max)= 75.948

R(reflections)= 0.0321( 2062)

wR2(reflections)= 0.0835( 2156)

S = 1.087

N<sub>par</sub> = 140

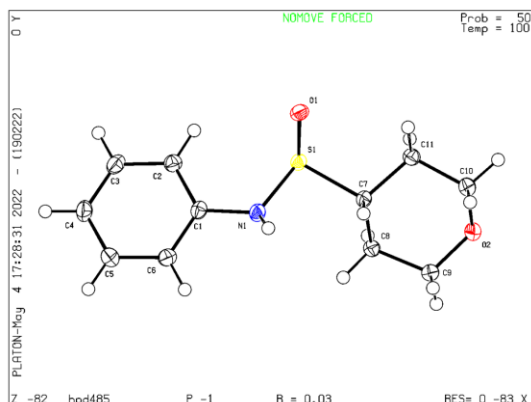

# Methyl 4-((phenylamino)sulfinyl)bicyclo[2.2.2]octane-1-carboxylate (1t)

CCDC 2170584

Bond precision: C-C = 0.0023 Å Wavelength = 1.54184  
Cell: a = 5.8837(1) b = 9.3010(1) c = 14.8817(2)  
 $\alpha$  = 72.840(1)  $\beta$  = 81.889(1)  $\gamma$  = 75.062(1)

Temperature: 100 K

|                                     | Calculated                                        | Reported                                          |
|-------------------------------------|---------------------------------------------------|---------------------------------------------------|
| Volume                              | 749.973(19)                                       | 749.973(19)                                       |
| Space group                         | P -1                                              | P -1                                              |
| Hall group                          | -P 1                                              | -P 1                                              |
| Moiety formula                      | C <sub>16</sub> H <sub>21</sub> NO <sub>3</sub> S | C <sub>16</sub> H <sub>21</sub> NO <sub>3</sub> S |
| Sum formula                         | C <sub>16</sub> H <sub>21</sub> NO <sub>3</sub> S | C <sub>16</sub> H <sub>21</sub> NO <sub>3</sub> S |
| Mr                                  | 307.40                                            | 307.40                                            |
| D <sub>x</sub> , g cm <sup>-3</sup> | 1.361                                             | 1.361                                             |
| Z                                   | 2                                                 | 2                                                 |
| Mu (mm <sup>-1</sup> )              | 2.002                                             | 2.002                                             |
| F <sub>000</sub>                    | 328.0                                             | 328.0                                             |
| F <sub>000</sub> '                  | 329.56                                            |                                                   |
| h,k,l <sub>max</sub>                | 7,11,18                                           | 7,11,18                                           |
| N <sub>ref</sub>                    | 3155                                              | 2989                                              |
| T <sub>min</sub> , T <sub>max</sub> | 0.766, 0.883                                      | 0.388, 1.000                                      |
| T <sub>min</sub> '                  | 0.663                                             |                                                   |

Correction method = # Reported T Limits: T<sub>min</sub> = 0.388 T<sub>max</sub> = 1.000 AbsCorr = GAUSSIAN

Data completeness = 0.947

Theta(max) = 76.355

R(reflections) = 0.0384(2788)

wR2(reflections) = 0.1014( 2989)

S = 1.070

N<sub>par</sub> = 192

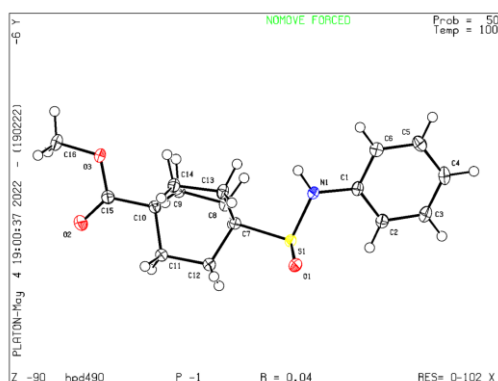

# N-(6-Methylpyridin-2-yl)cyclopent-3-ene-1-sulfonamide (4e)

CCDC 2176484

Bond precision: C-C = 0.0029 Å Wavelength = 1.54184

Cell: a = 6.3363(2) b = 21.0331(7) c = 8.3324(2)

$\alpha = 90$   $\beta = 95.395(3)$   $\gamma = 90$

Temperature: 100 K

|                                     | Calculated                                        | Reported                                          |
|-------------------------------------|---------------------------------------------------|---------------------------------------------------|
| Volume                              | 1105.56(6)                                        | 1105.55(6)                                        |
| Space group                         | P 21/n                                            | P 1 21/n 1                                        |
| Hall group                          | -P 2yn                                            | -P 2yn                                            |
| Moiety formula                      | C <sub>11</sub> H <sub>14</sub> N <sub>2</sub> OS | C <sub>11</sub> H <sub>14</sub> N <sub>2</sub> OS |
| Sum formula                         | C <sub>11</sub> H <sub>14</sub> N <sub>2</sub> OS | C <sub>11</sub> H <sub>14</sub> N <sub>2</sub> OS |
| Mr                                  | 222.30                                            | 222.30                                            |
| D <sub>x</sub> , g cm <sup>-3</sup> | 1.336                                             | 1.336                                             |
| Z                                   | 4                                                 | 4                                                 |
| Mu (mm <sup>-1</sup> )              | 2.394                                             | 2.394                                             |
| F <sub>000</sub>                    | 472.0                                             | 472.0                                             |
| F <sub>000</sub> '                  | 474.50                                            |                                                   |
| h,k,l <sub>max</sub>                | 7,26,10                                           | 7,26,10                                           |
| N <sub>ref</sub>                    | 2315                                              | 2229                                              |
| T <sub>min</sub> , T <sub>max</sub> | 0.744, 0.862                                      | 0.804, 1.000                                      |
| T <sub>min</sub> '                  | 0.615                                             |                                                   |

Correction method = # Reported T Limits: T<sub>min</sub> = 0.804 T<sub>max</sub> = 1.000 AbsCorr = GAUSSIAN

Data completeness = 0.963

Theta(max) = 76.442

R(reflections) = 0.0417(2070)

wR2(reflections) = 0.1050(2229)

S = 1.059

N<sub>par</sub> = 137

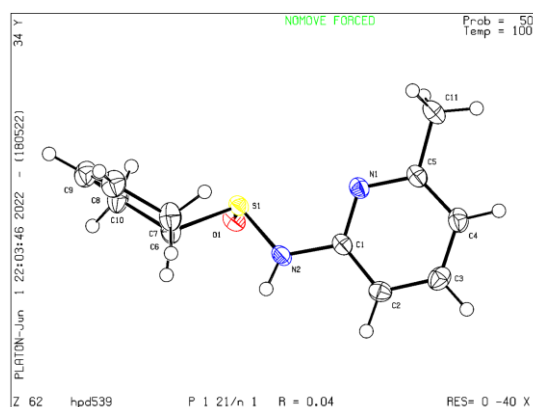

## N-(5-Bromopyrimidin-2-yl)-5-chloropentane-1-sulfonamide (4f)

CCDC 2170581

Bond precision: C-C = 0.0123 Å Wavelength = 1.54184  
Cell: a = 5.5464(6) b = 11.0627(10) c = 11.4651(8)  
 $\alpha$  = 70.025(7)  $\beta$  = 84.920(8)  $\gamma$  = 76.652(9)

Temperature: 100 K

|                                     | Calculated                                                         | Reported                                                           |
|-------------------------------------|--------------------------------------------------------------------|--------------------------------------------------------------------|
| Volume                              | 643.26(11)                                                         | 643.26(11)                                                         |
| Space group                         | P -1                                                               | P -1                                                               |
| Hall group                          | -P 1                                                               | -P 1                                                               |
| Moiety formula                      | C <sub>9</sub> H <sub>13</sub> BrClN <sub>3</sub> O <sub>2</sub> S | C <sub>9</sub> H <sub>13</sub> BrClN <sub>3</sub> O <sub>2</sub> S |
| Sum formula                         | C <sub>9</sub> H <sub>13</sub> BrClN <sub>3</sub> O <sub>2</sub> S | C <sub>9</sub> H <sub>13</sub> BrClN <sub>3</sub> O <sub>2</sub> S |
| Mr                                  | 342.63                                                             | 342.64                                                             |
| D <sub>x</sub> , g cm <sup>-3</sup> | 1.769                                                              | 1.769                                                              |
| Z                                   | 2                                                                  | 2                                                                  |
| Mu (mm <sup>-1</sup> )              | 7.759                                                              | 7.759                                                              |
| F000                                | 344.0                                                              | 344.0                                                              |
| F000'                               | 344.73                                                             |                                                                    |
| h,k,l <sub>max</sub>                | 6,13,13                                                            | 6,13,13                                                            |
| N <sub>ref</sub>                    | 2445                                                               | 2379                                                               |
| T <sub>min</sub> , T <sub>max</sub> | 0.513, 0.572                                                       | 0.632, 1.000                                                       |
| T <sub>min</sub> '                  | 0.191                                                              |                                                                    |

Correction method = # Reported T Limits: T<sub>min</sub> = 0.632 T<sub>max</sub> = 1.000 AbsCorr = GAUSSIAN

Data completeness = 0.973

Theta(max) = 69.977

R(reflections) = 0.0790(2011)

wR2(reflections) = 0.1791(2379)

S = 1.085

N<sub>par</sub> = 157

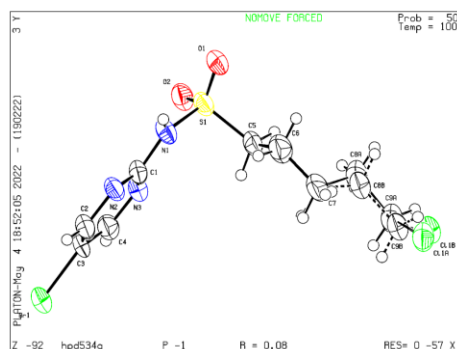

(6a*S*,6b*R*,8a*R*,10*S*,12a*R*,12b*R*,14b*S*)-10-Hydroxy-2,2,6a,6b,9,9,12a-heptamethyl-*N*-phenyl-1,3,4,5,6,6a,6b,7,8,8a,9,10,11,12,12a,12b,13,14b-octadecahydricene-4a(2*H*)-sulfonamide (7k)

CCDC 2170585

Bond precision: C-C = 0.0079 Å Wavelength = 1.54184

Cell: a = 14.1503(2) b = 19.7477(4) c = 25.7609(4)  
 $\alpha = 90$   $\beta = 90$   $\gamma = 90$

Temperature: 100 K

|                                     | Calculated                                        | Reported                                          |
|-------------------------------------|---------------------------------------------------|---------------------------------------------------|
| Volume                              | 7198.5(2)                                         | 7198.51(19)                                       |
| Space group                         | P 21 21 21                                        | P 21 21 21                                        |
| Hall group                          | P 2ac 2ab                                         | P 2ac 2ab                                         |
| Moiety formula                      | C <sub>35</sub> H <sub>53</sub> NO <sub>2</sub> S | C <sub>35</sub> H <sub>53</sub> NO <sub>2</sub> S |
| Sum formula                         | C <sub>35</sub> H <sub>53</sub> NO <sub>2</sub> S | C <sub>35</sub> H <sub>53</sub> NO <sub>2</sub> S |
| Mr                                  | 551.84                                            | 551.84                                            |
| D <sub>x</sub> , g cm <sup>-3</sup> | 1.018                                             | 1.018                                             |
| Z                                   | 8                                                 | 8                                                 |
| Mu (mm <sup>-1</sup> )              | 0.993                                             | 0.993                                             |
| F <sub>000</sub>                    | 2416.0                                            | 2416.0                                            |
| F <sub>000</sub> '                  | 2424.48                                           |                                                   |
| h,k,l <sub>max</sub>                | 17,24,32                                          | 17,24,32                                          |
| N <sub>ref</sub>                    | 15126[8263]                                       | 14140                                             |
| T <sub>min</sub> , T <sub>max</sub> | 0.919, 0.947                                      | 0.521, 1.000                                      |
| T <sub>min</sub> '                  | 0.808                                             |                                                   |

Correction method = # Reported T Limits: T<sub>min</sub> = 0.521 T<sub>max</sub> = 1.000 AbsCorr = GAUSSIAN

Data completeness = 1.71/0.93

Theta(max) = 76.474

R(reflections) = 0.0698(13023)

wR2(reflections) = 0.1577( 14140)

S = 1.062

N<sub>par</sub> = 721

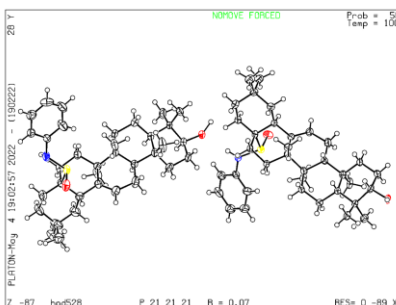

# NMR Spectroscopic data

## N-Phenylcyclohexanesulfinamide (1a)

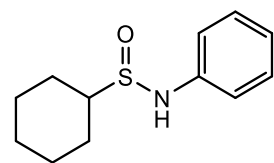

<sup>1</sup>H NMR (500 MHz, CDCl<sub>3</sub>)

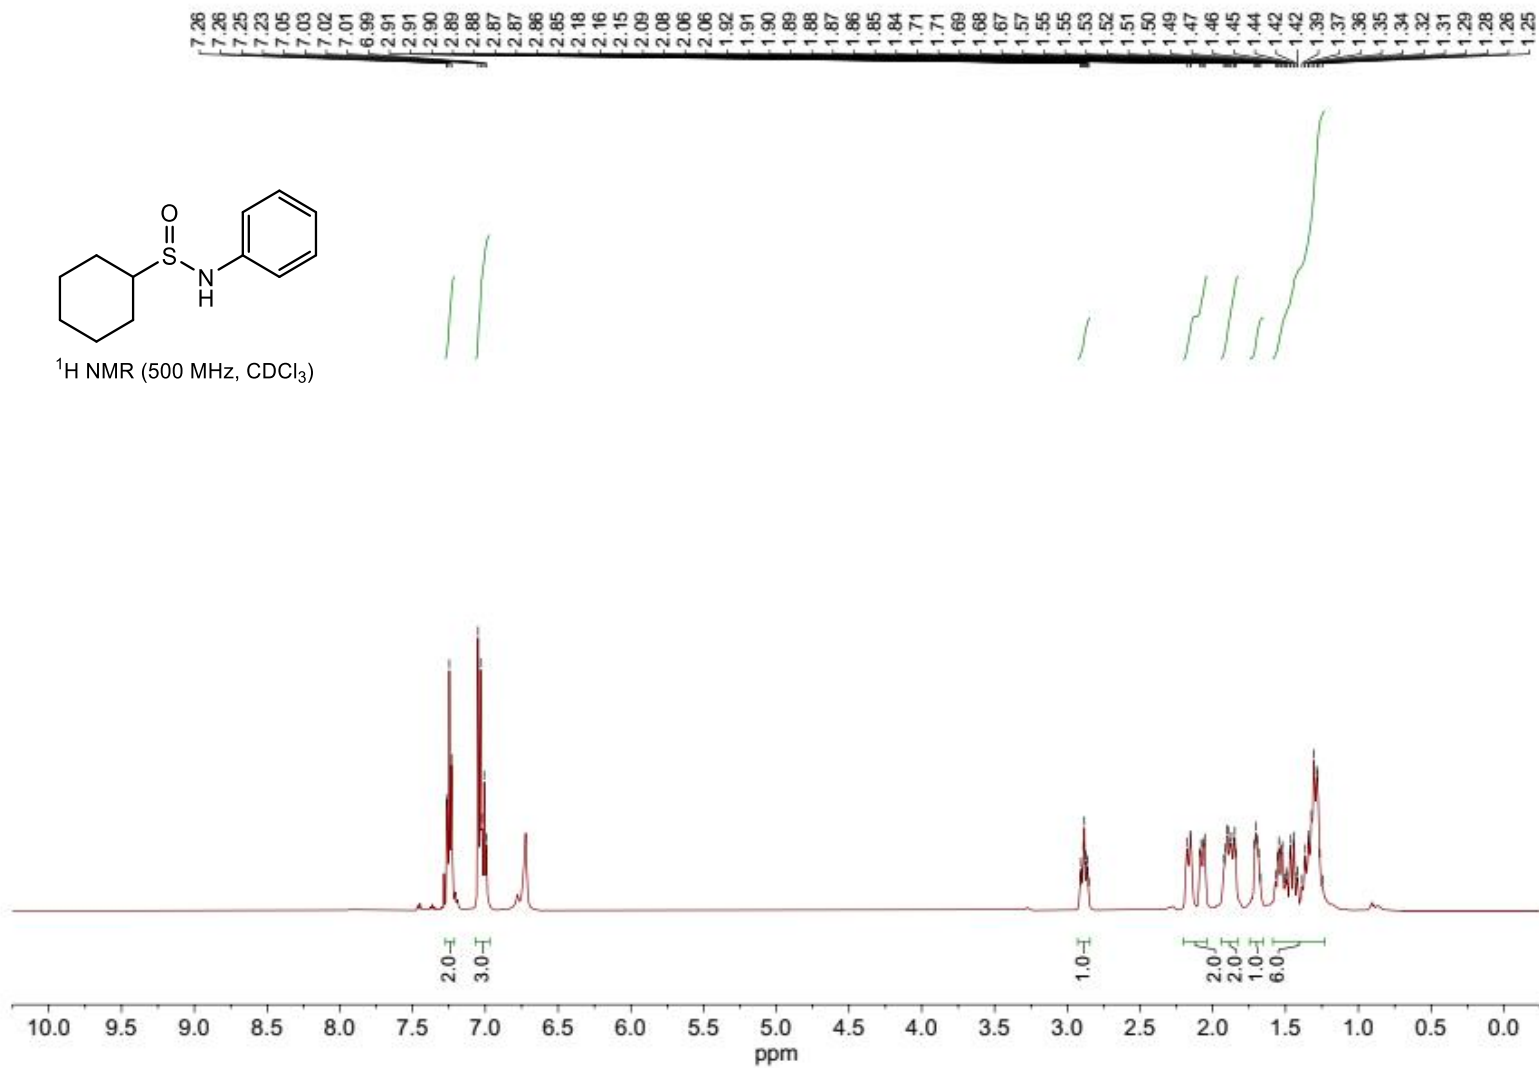

### N-Phenylcyclohexanesulfinamide (1a)

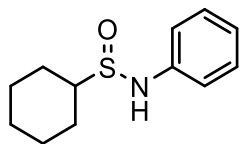

$^{13}\text{C}$  NMR (125 MHz,  $\text{CDCl}_3$ )

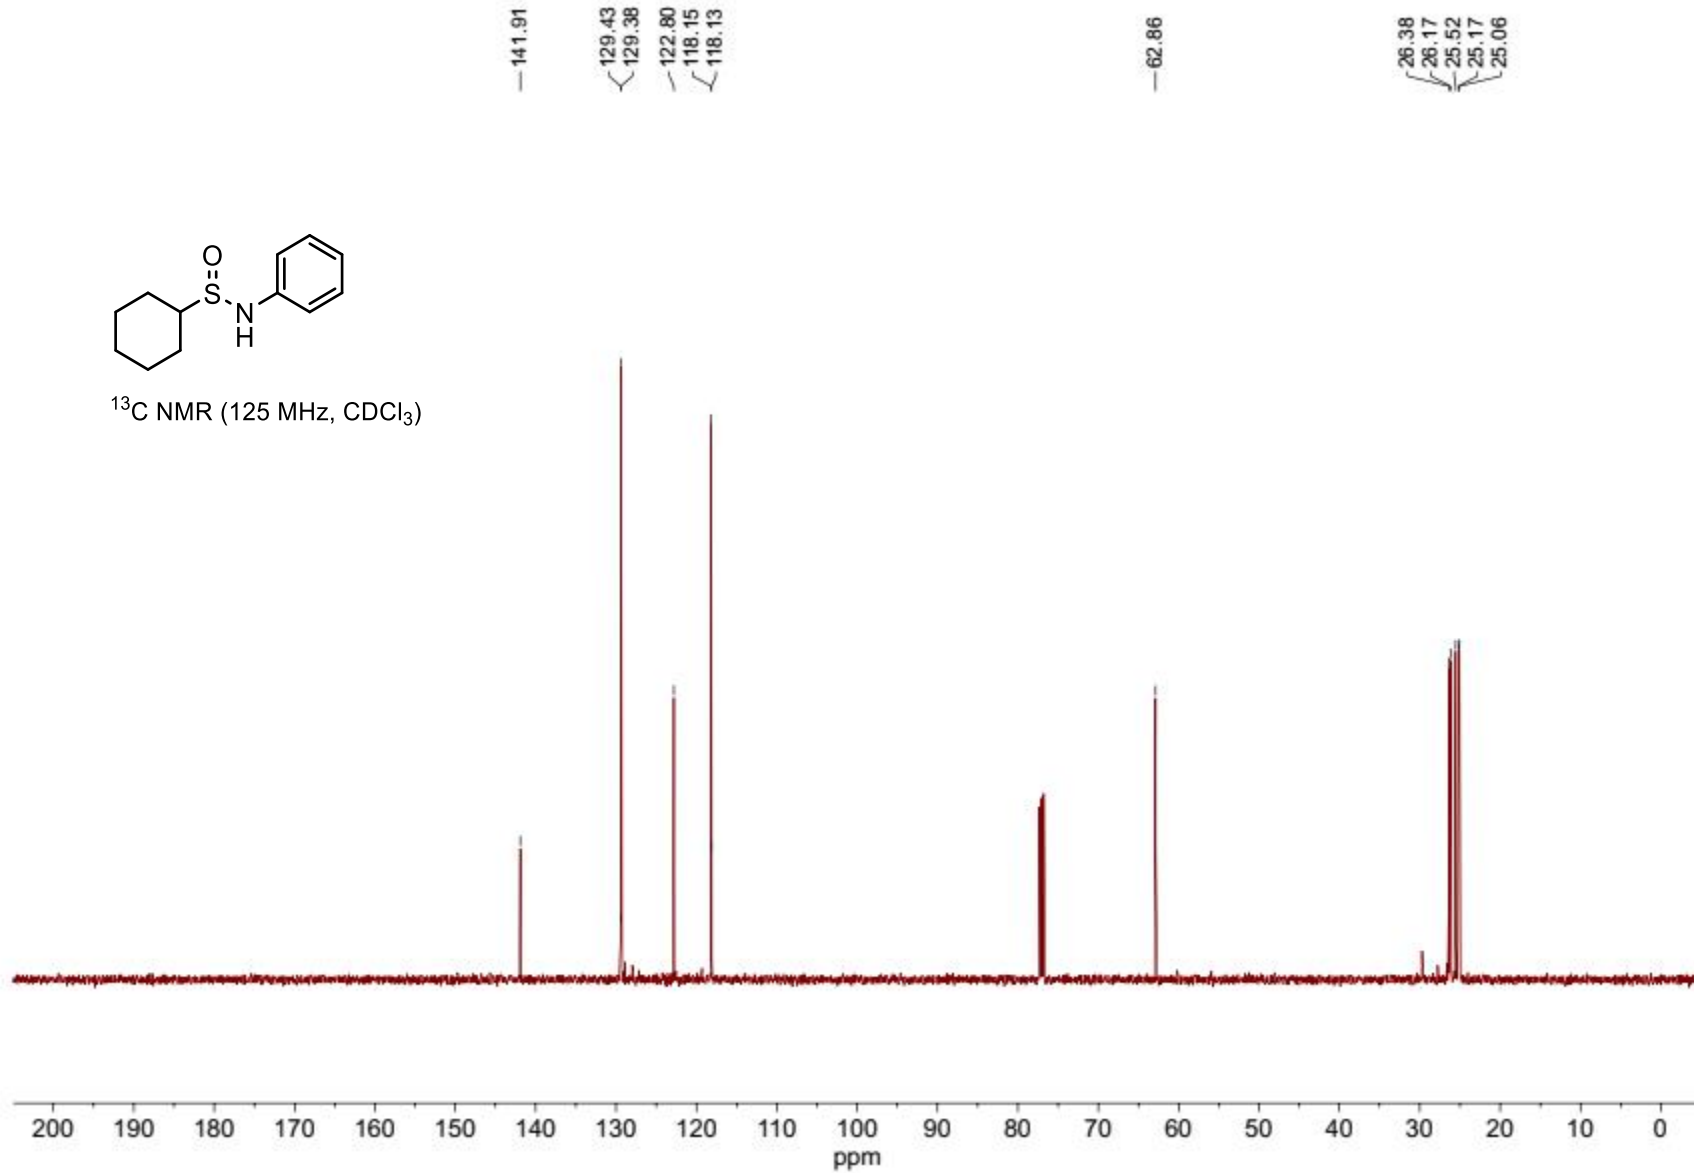

### N-Phenylnonane-1-sulfonamide (1b)

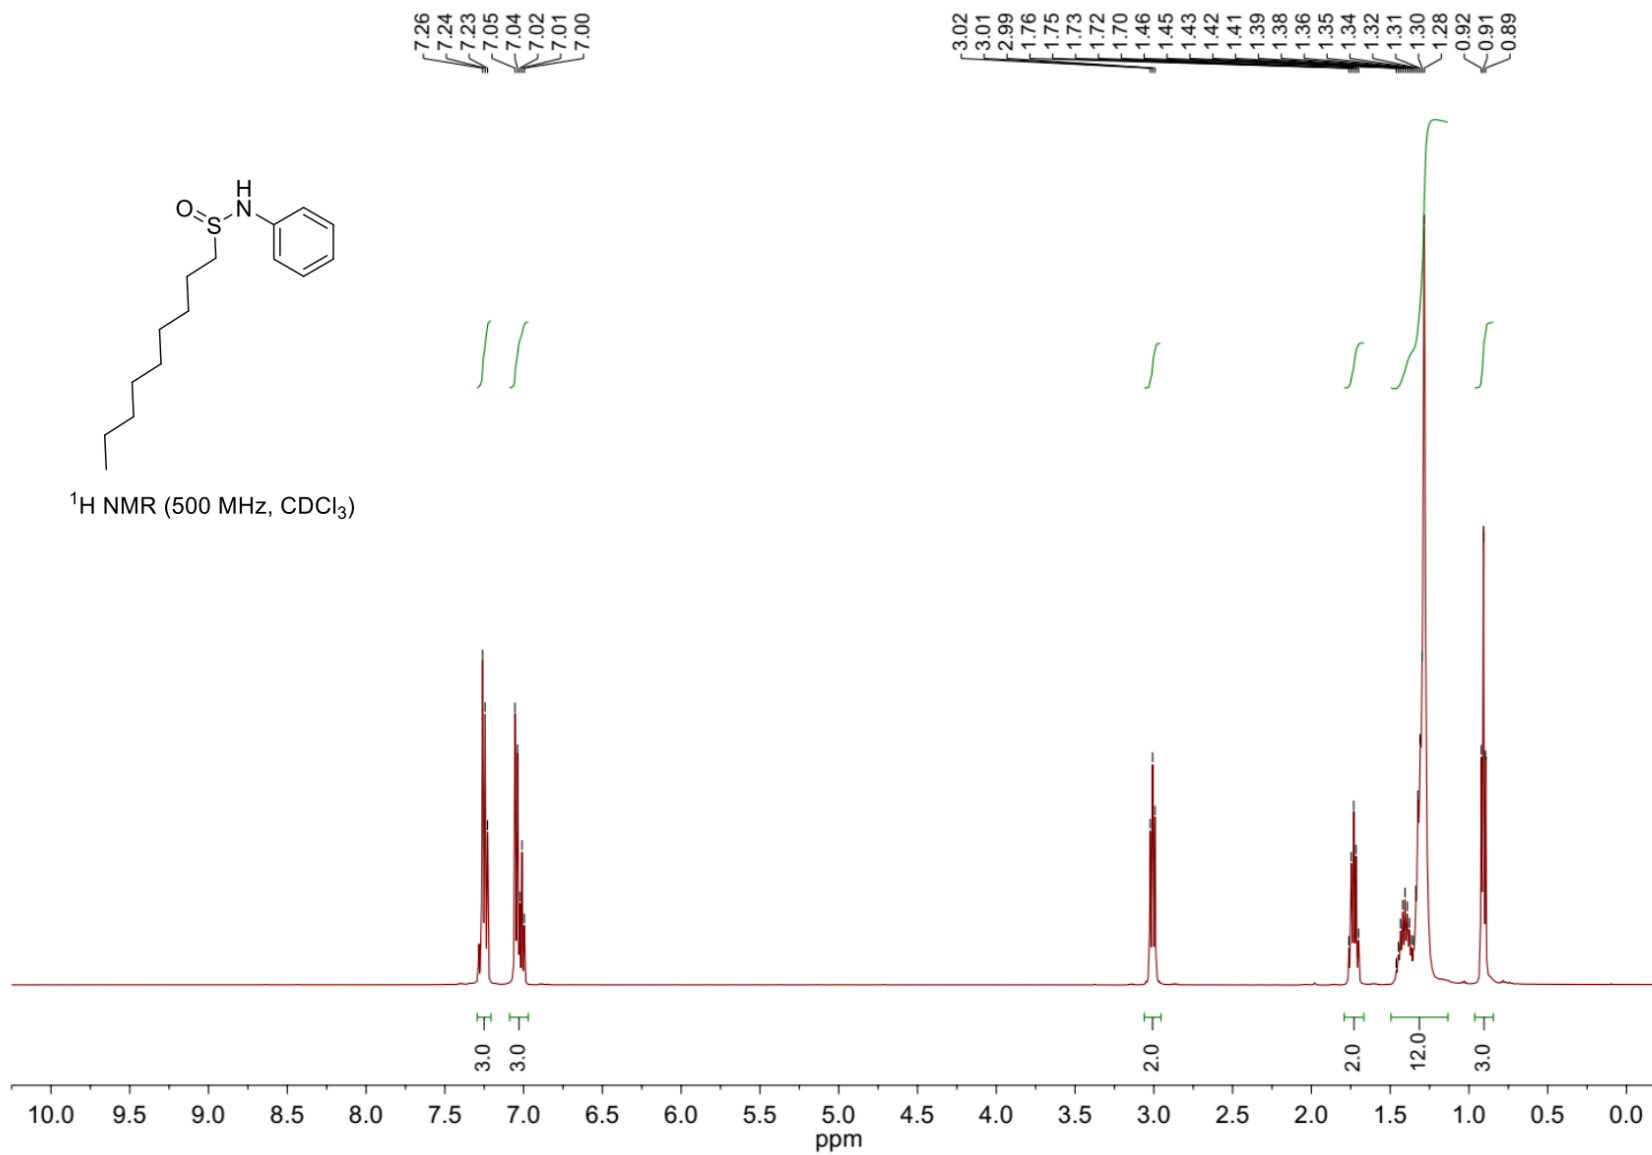



### N-Phenylnonane-1-sulfonamide (1b)

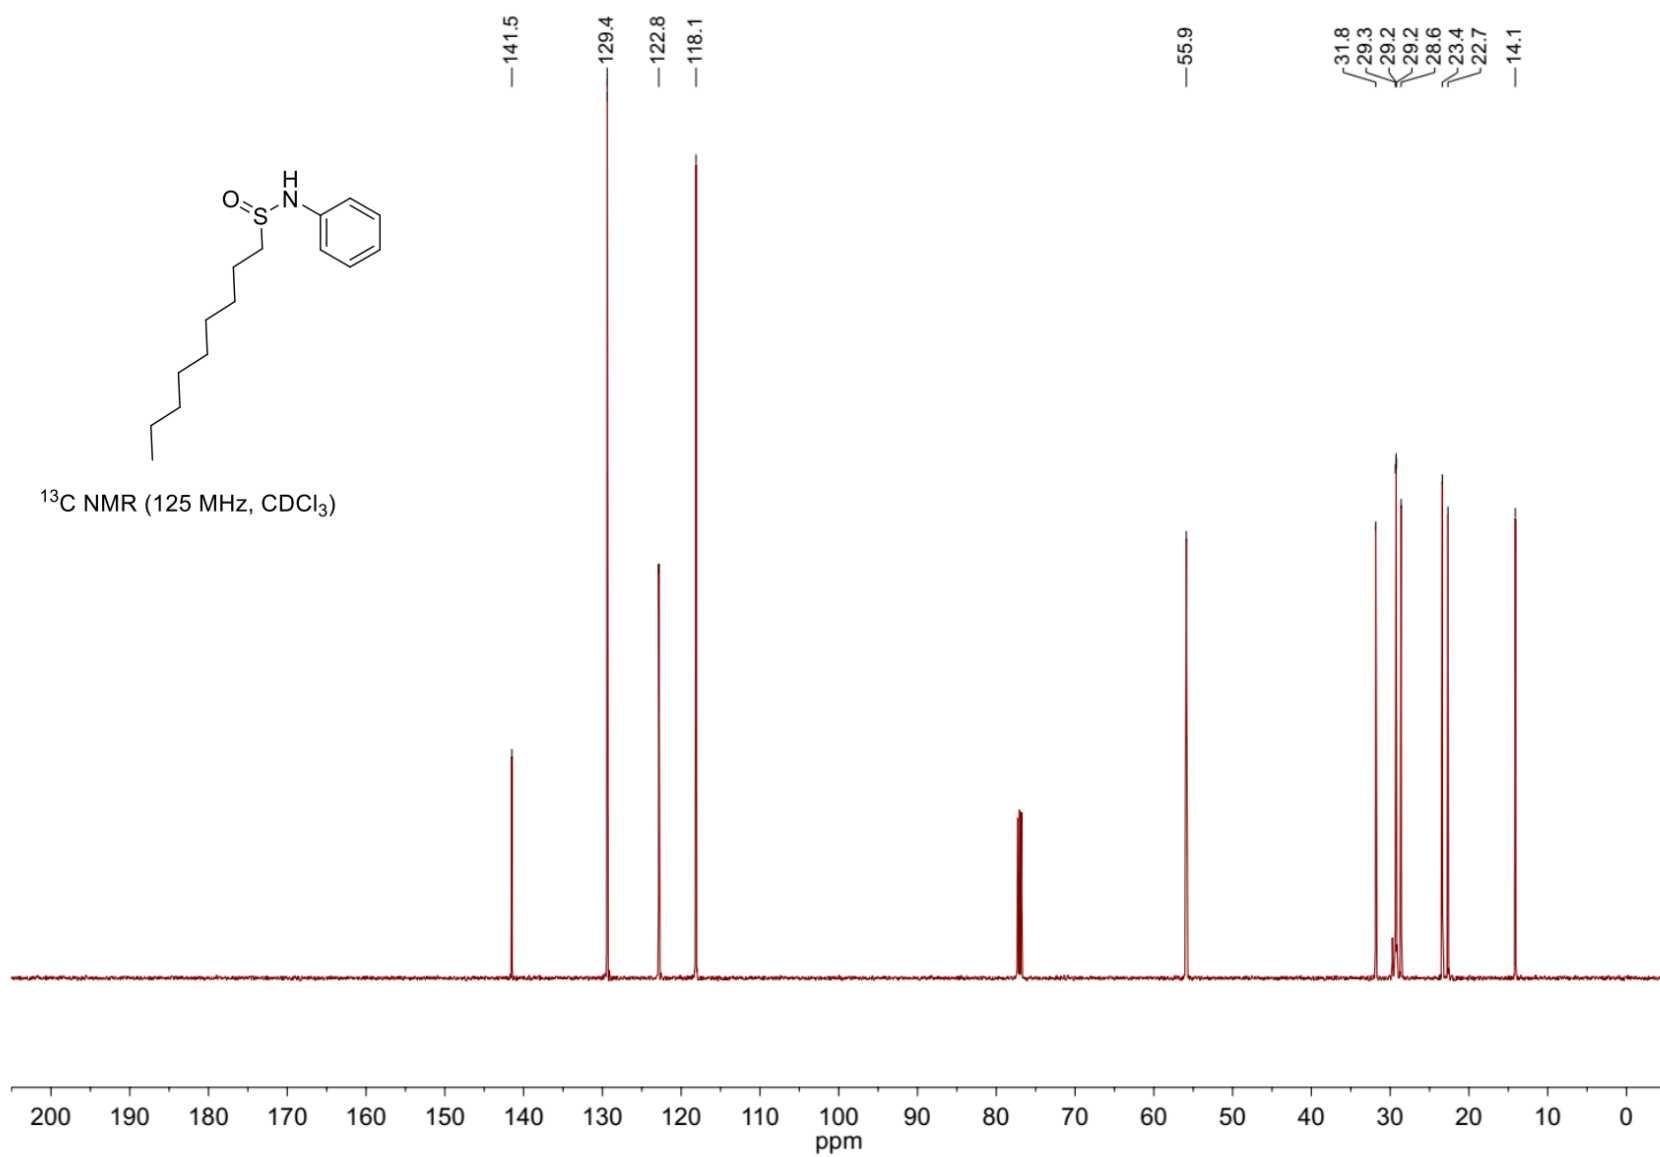

### 1-Cyclopentyl-N-phenylmethanesulfinamide (1c)

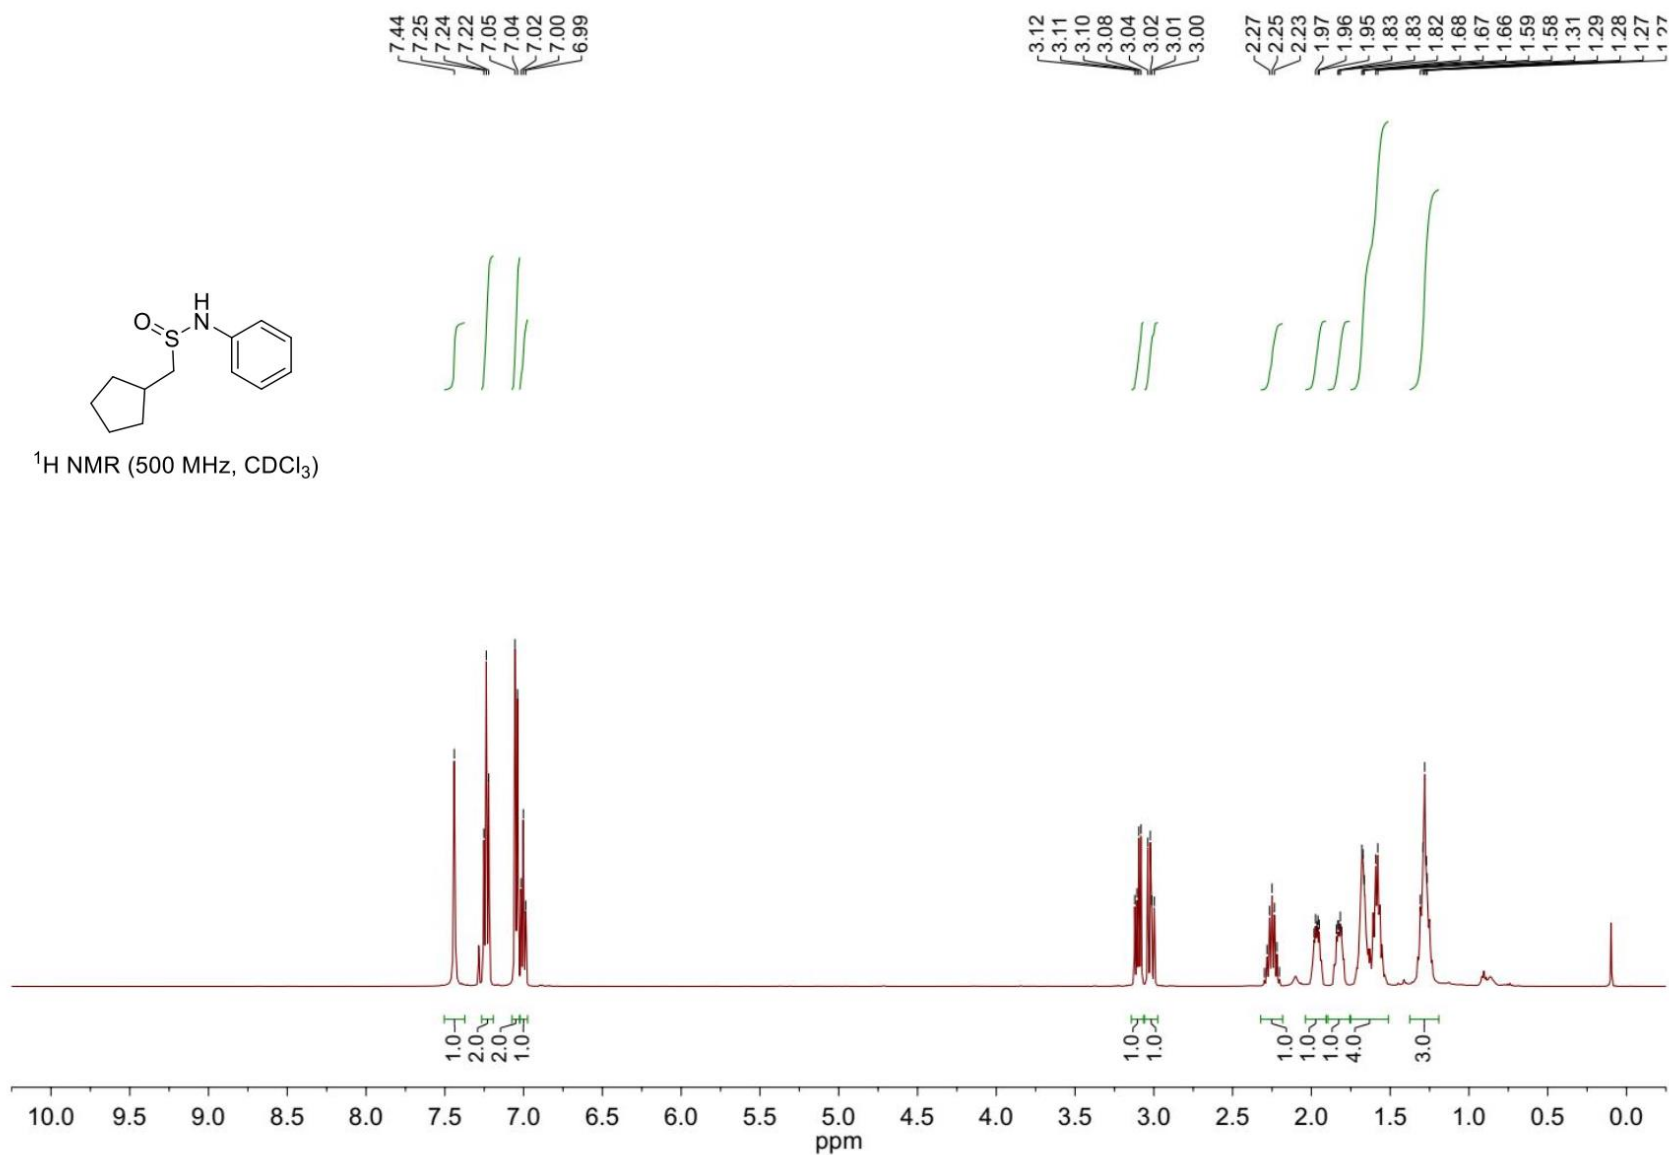

### 1-Cyclopentyl-N-phenylmethanesulfinamide (1c)

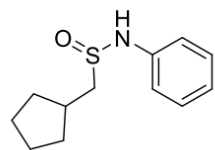

$^{13}\text{C}$  NMR (125 MHz,  $\text{CDCl}_3$ )

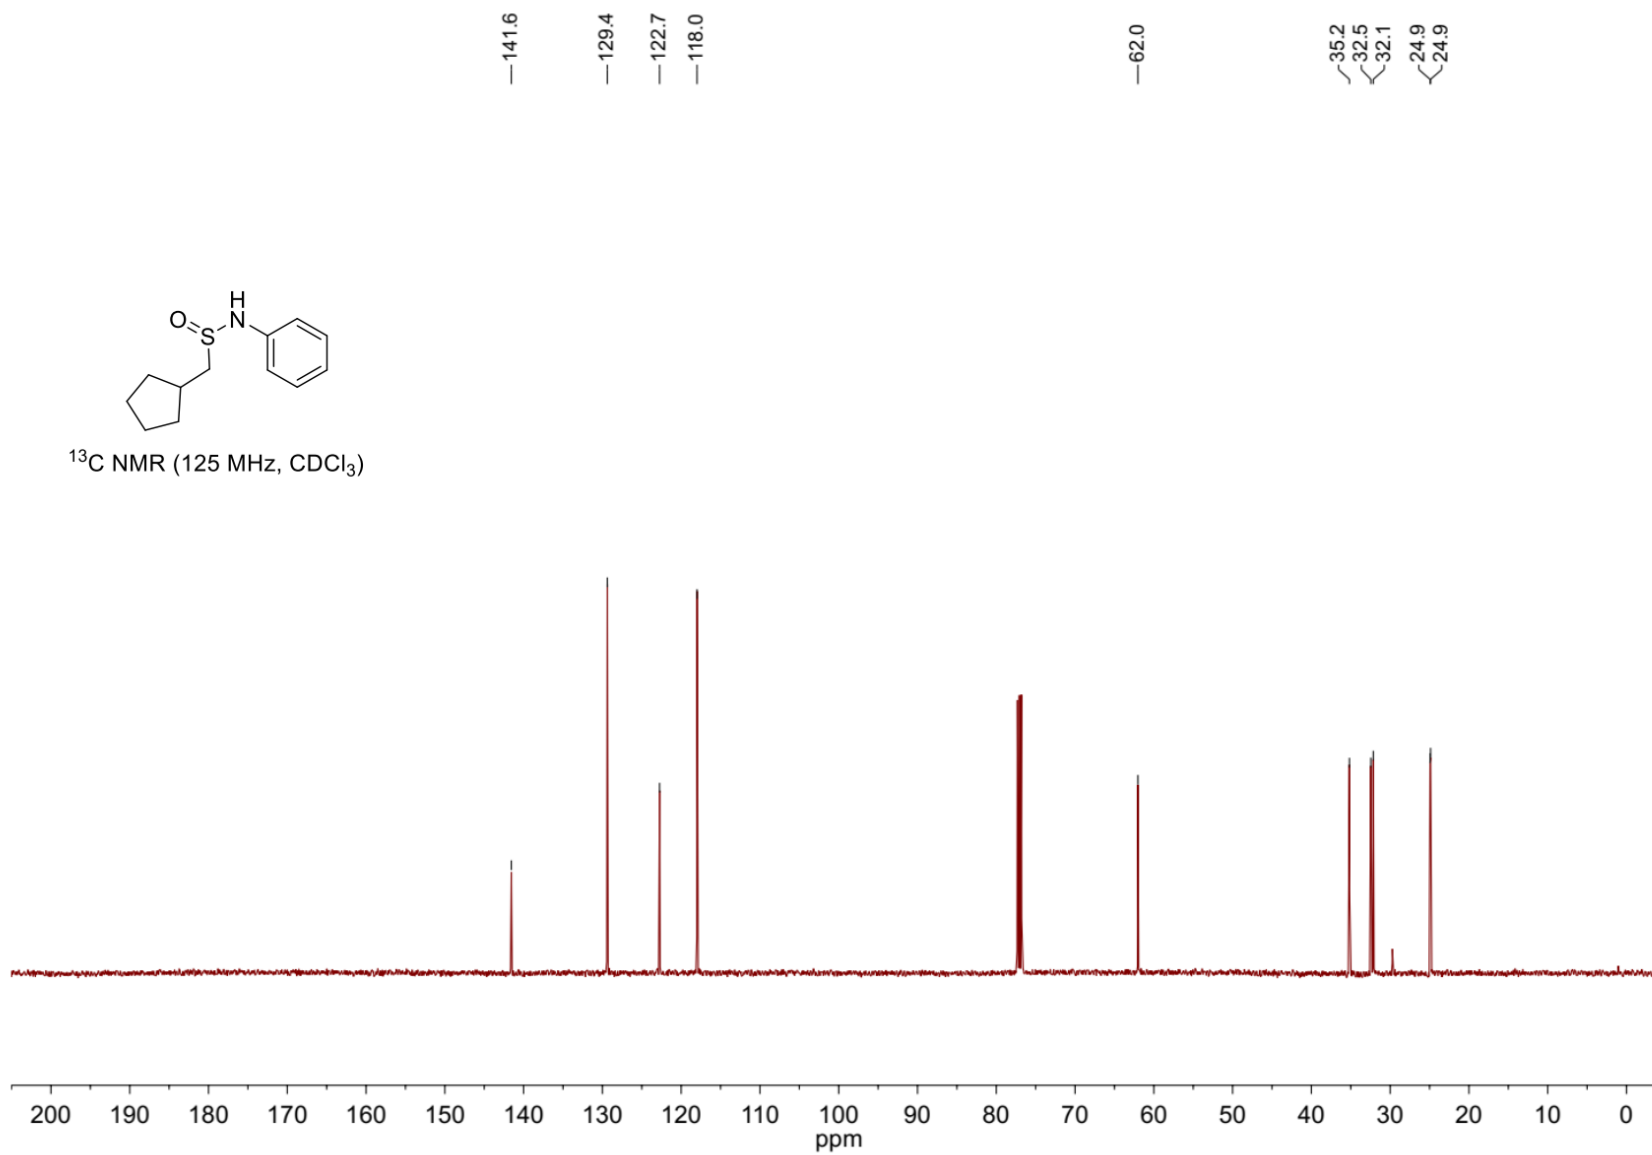

### 5-Chloro-N-phenylpentane-1-sulfonamide (1d)

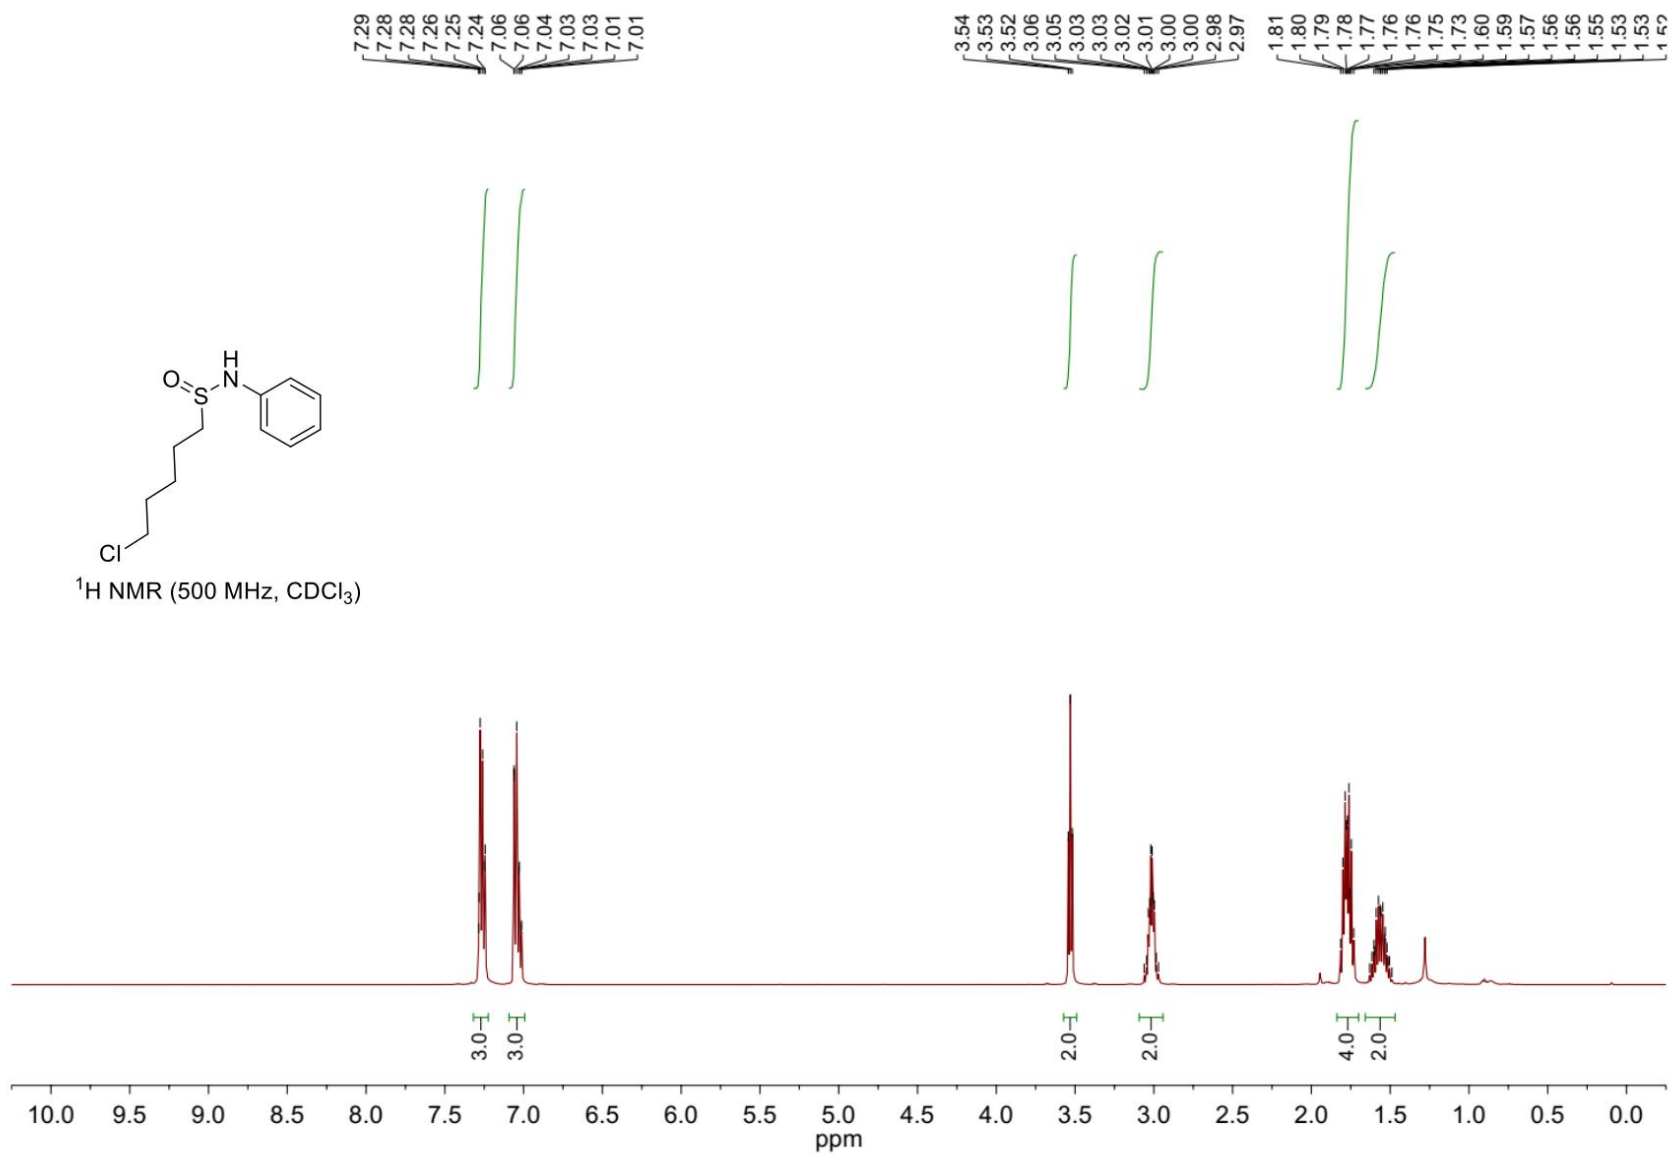

### 5-Chloro-N-phenylpentane-1-sulfonamide (1d)

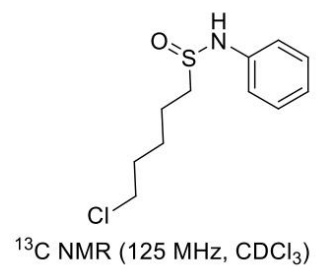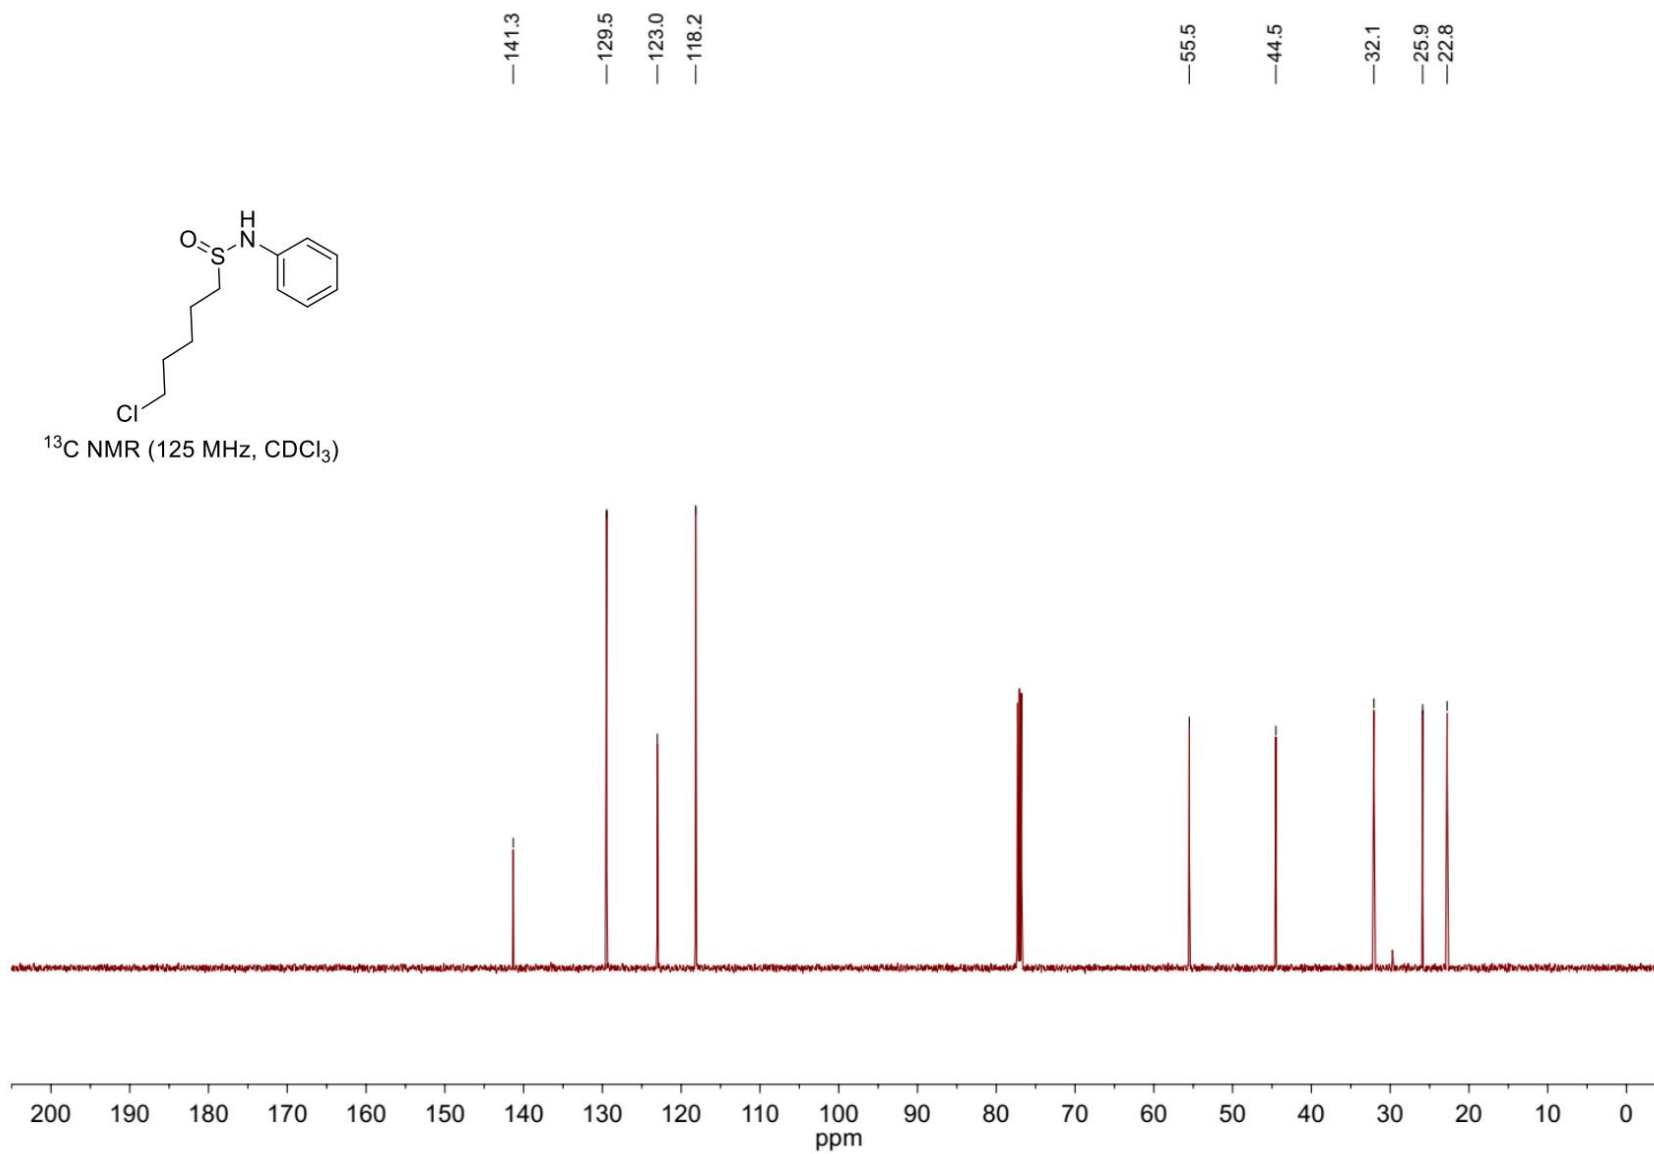

5-Bromo-N-phenylpentane-1-sulfonamide (1e)

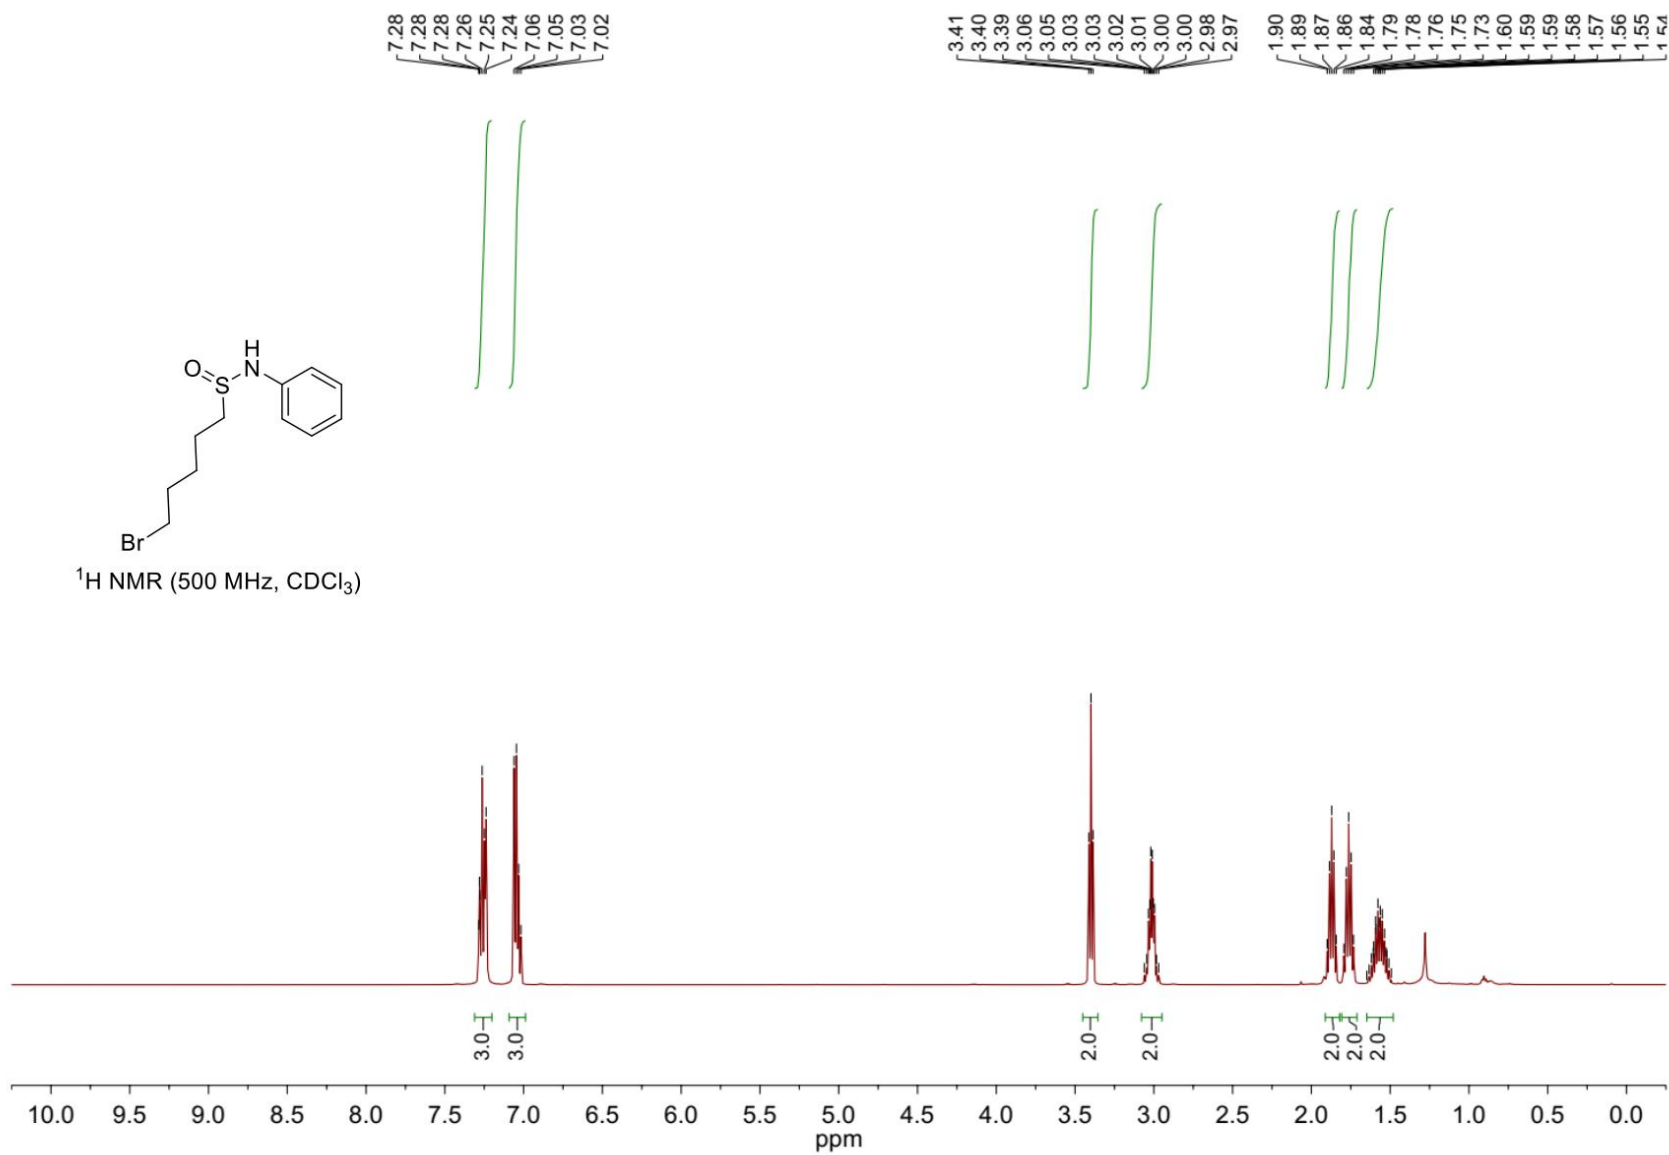

### 5-Bromo-N-phenylpentane-1-sulfonamide (1e)

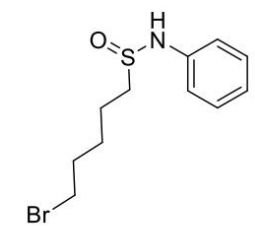

$^{13}\text{C}$  NMR (125 MHz,  $\text{CDCl}_3$ )

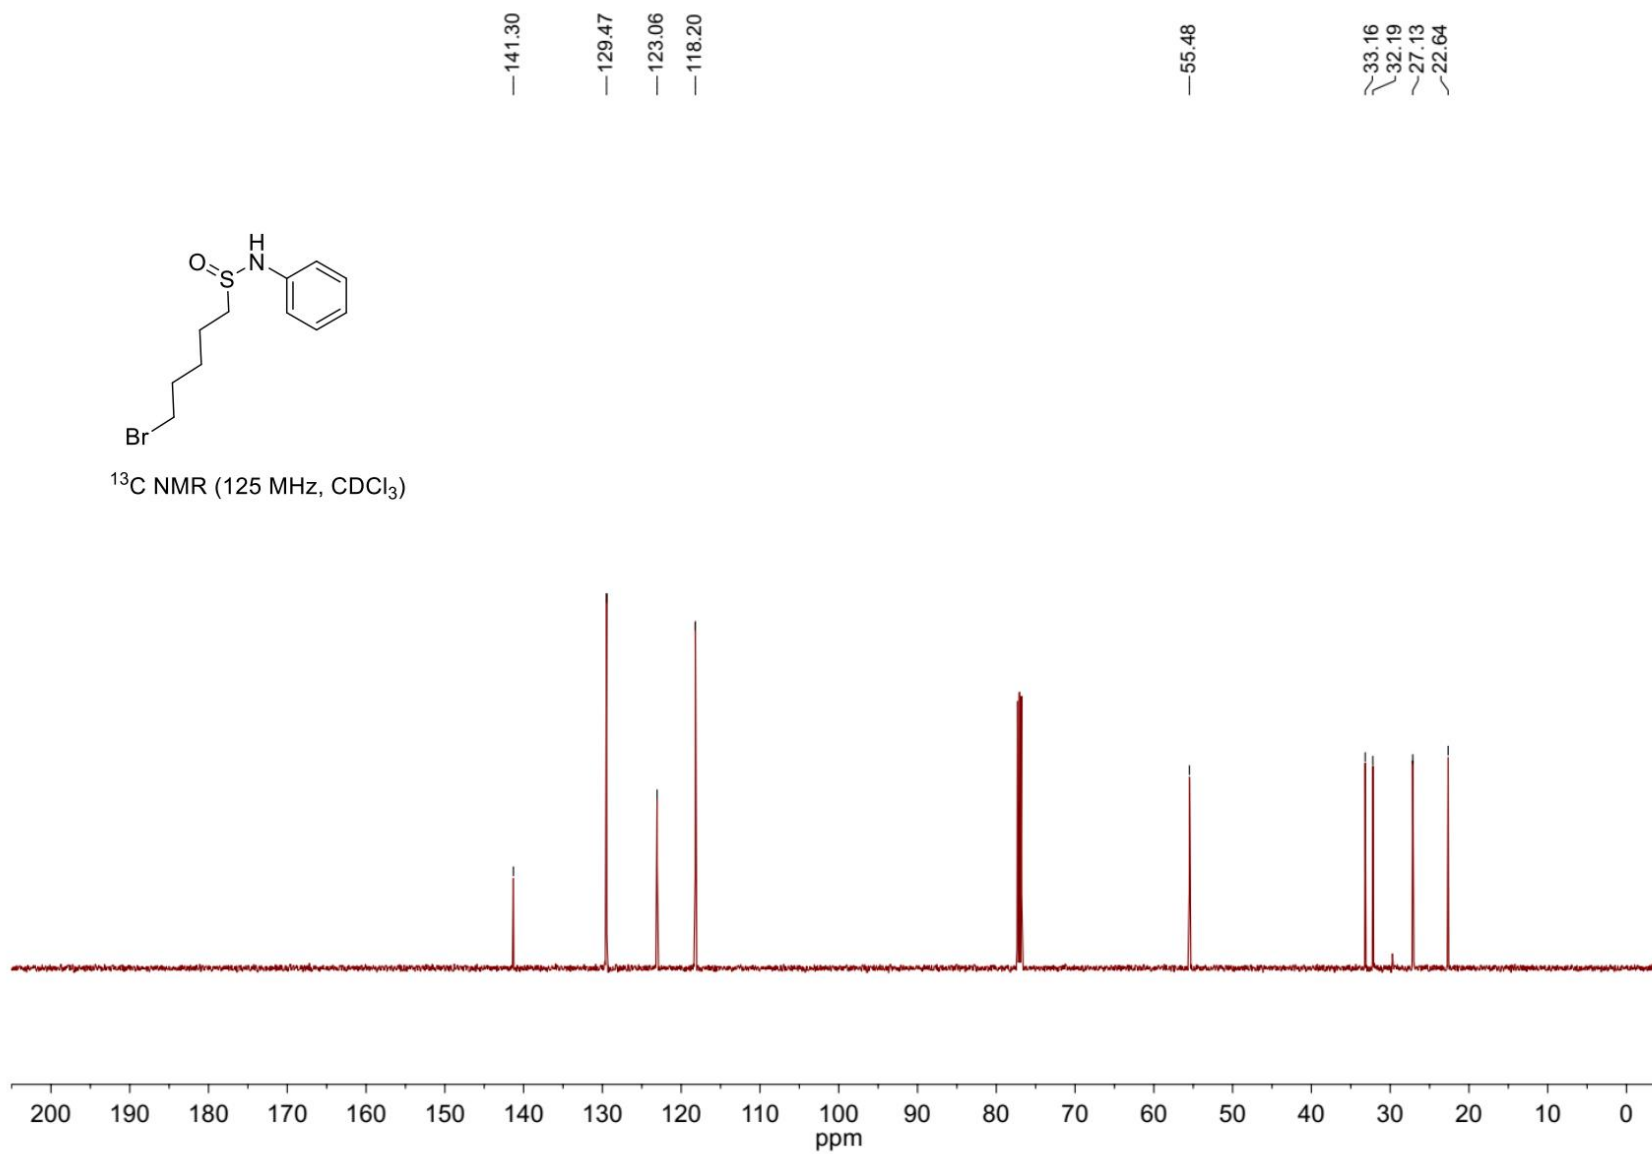

### 2-(4-Fluorophenyl)-N-phenylethane-1-sulfonamide (1f)

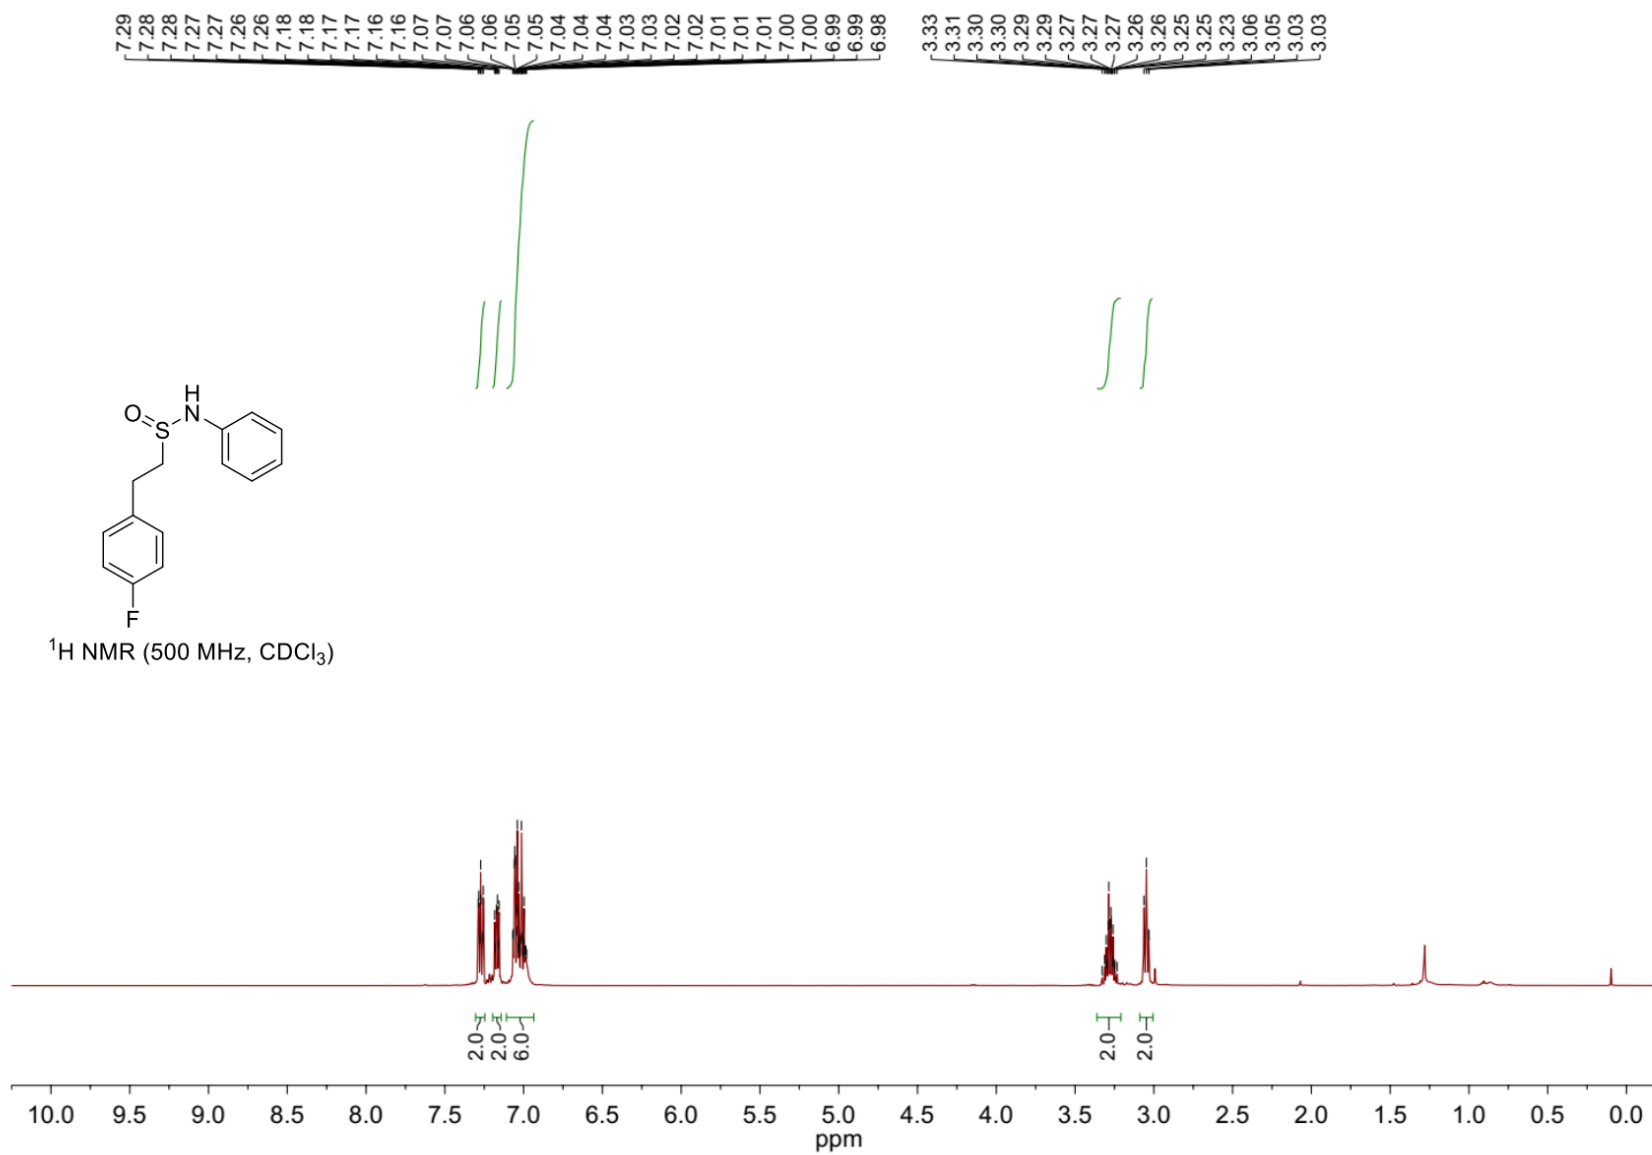



2-(4-Fluorophenyl)-N-phenylethane-1-sulfonamide (1f)

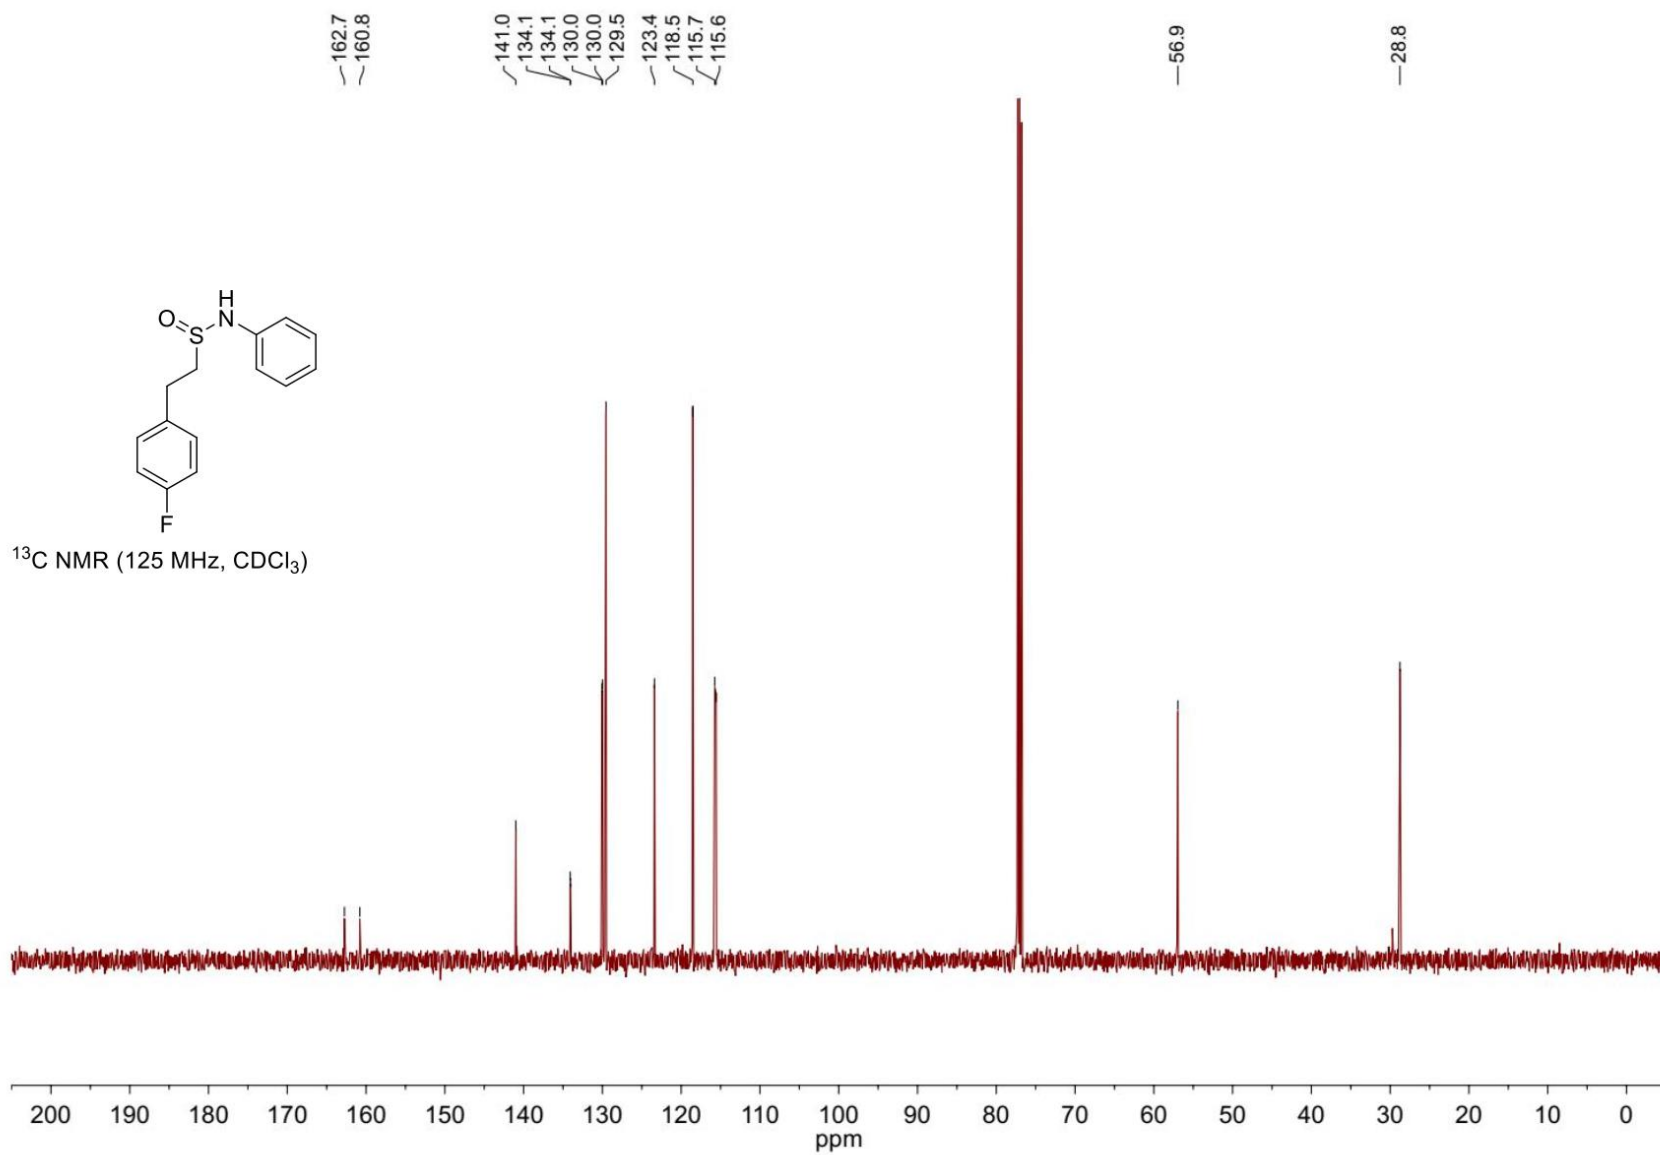

### 4-Oxo-N,4-diphenylbutane-1-sulfonamide (1g)

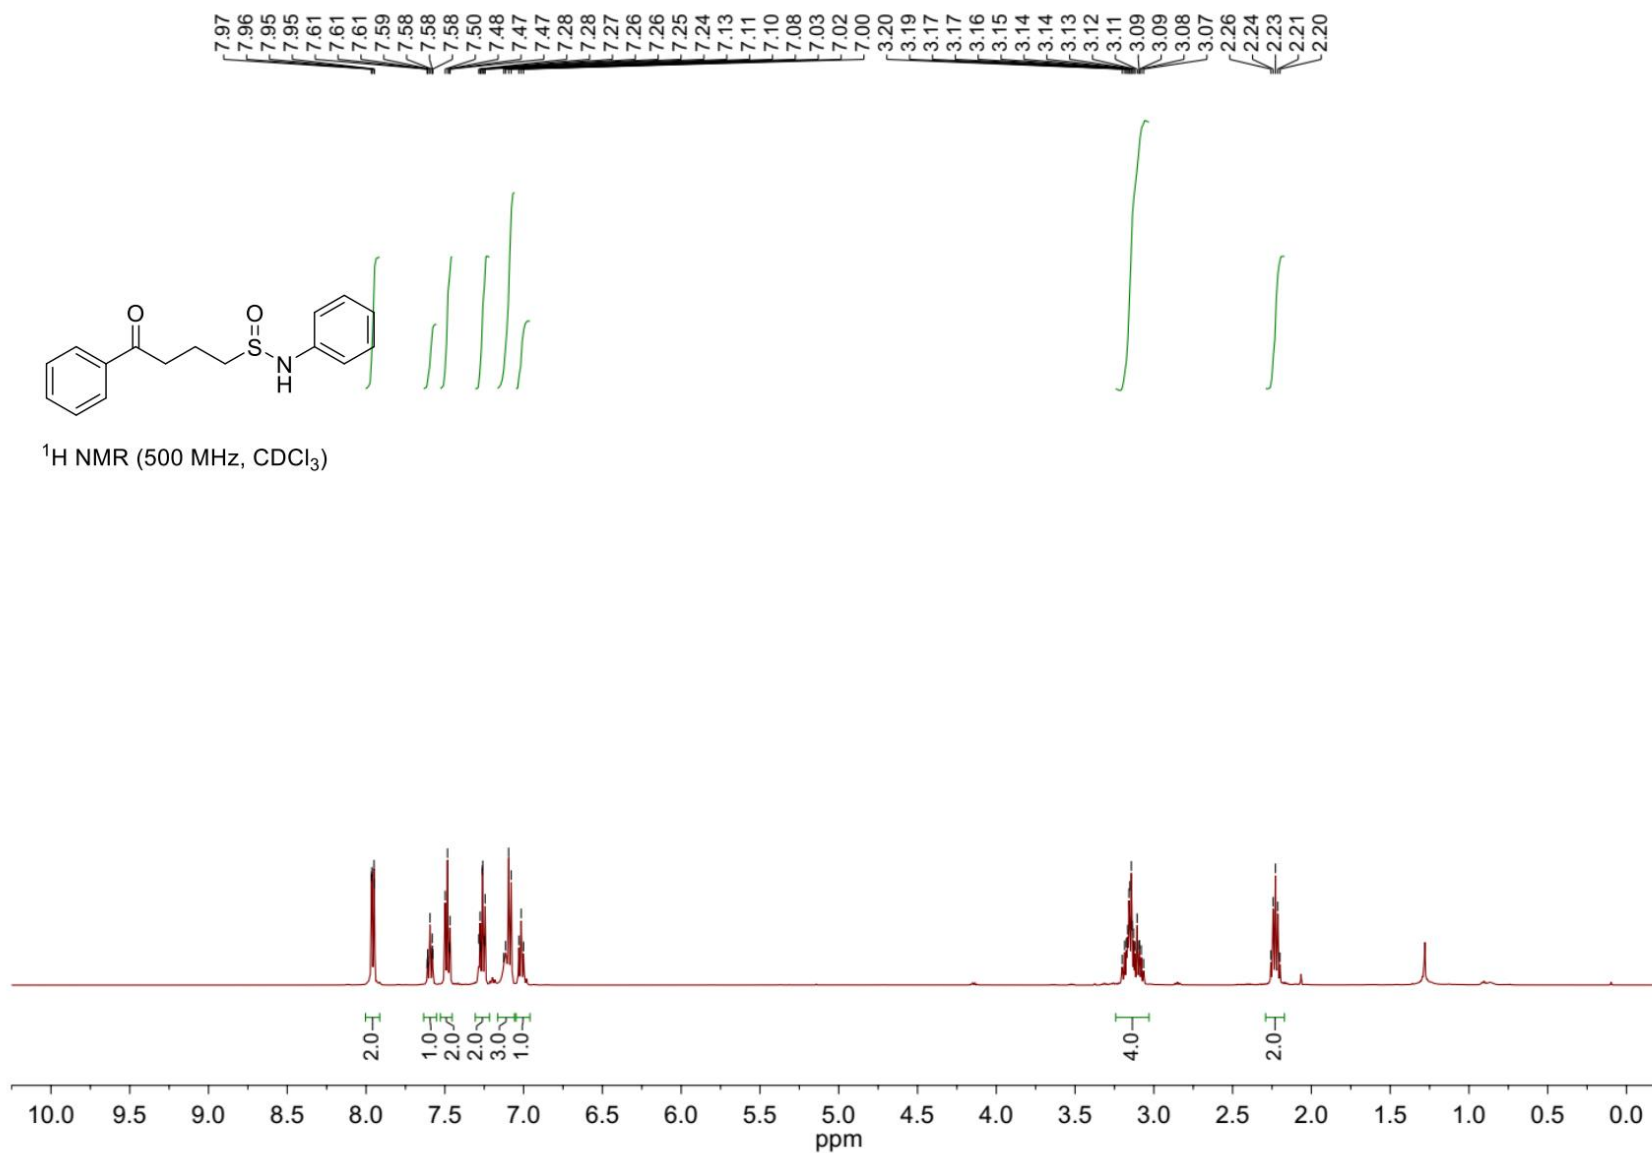

### 4-Oxo-N,4-diphenylbutane-1-sulfinamide (1g)

—198.7

~141.2  
~136.5  
~133.4  
~129.5  
~128.7  
~128.0  
~123.2  
~118.4

—54.8

—36.7

—17.8

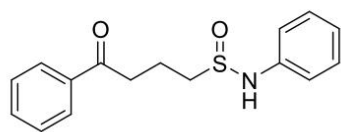

<sup>13</sup>C NMR (125 MHz, CDCl<sub>3</sub>)

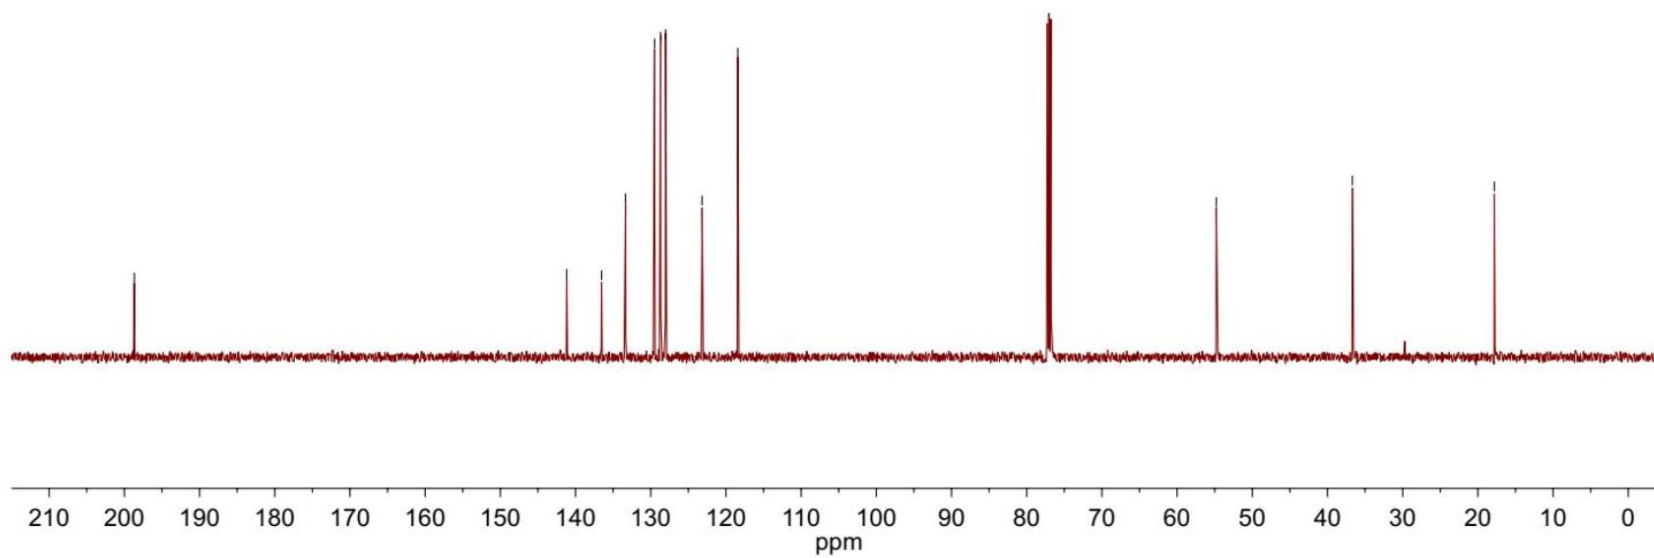

# Methyl 5-((phenylamino)sulfinyl)pentanoate (1h)

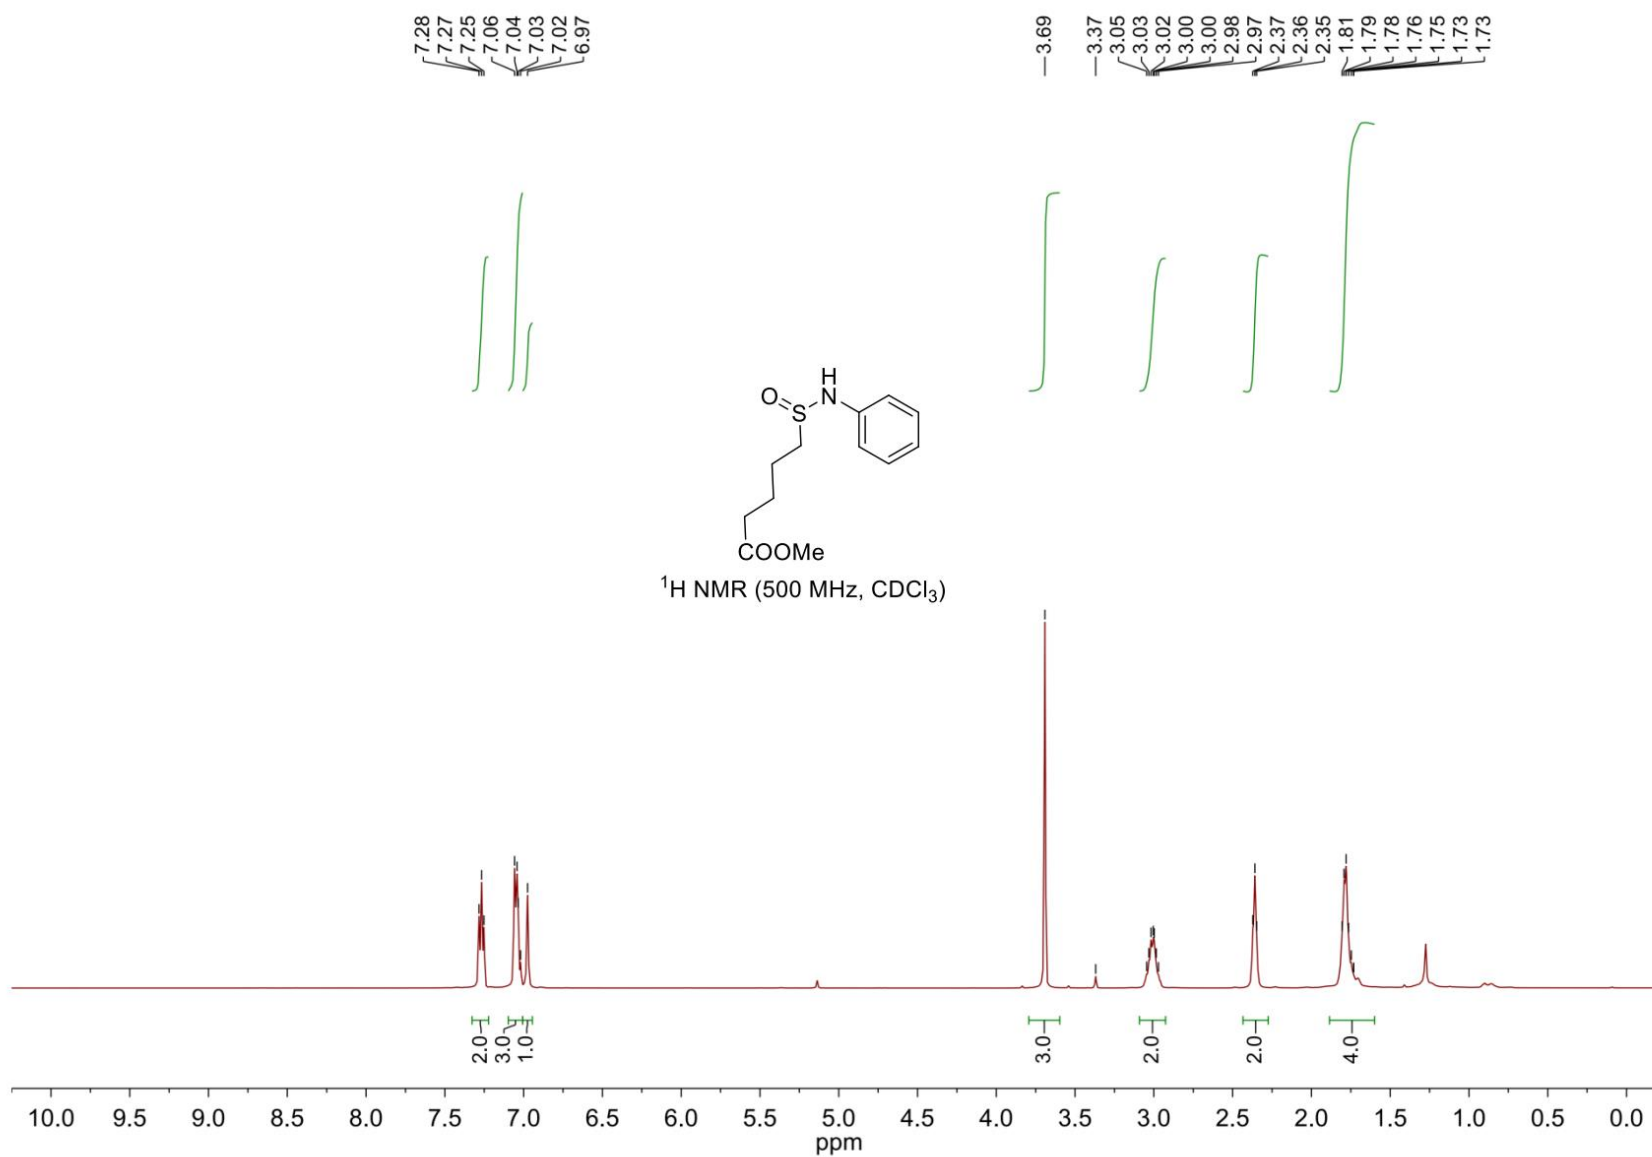

# Methyl 5-((phenylamino)sulfinyl)pentanoate (1h)

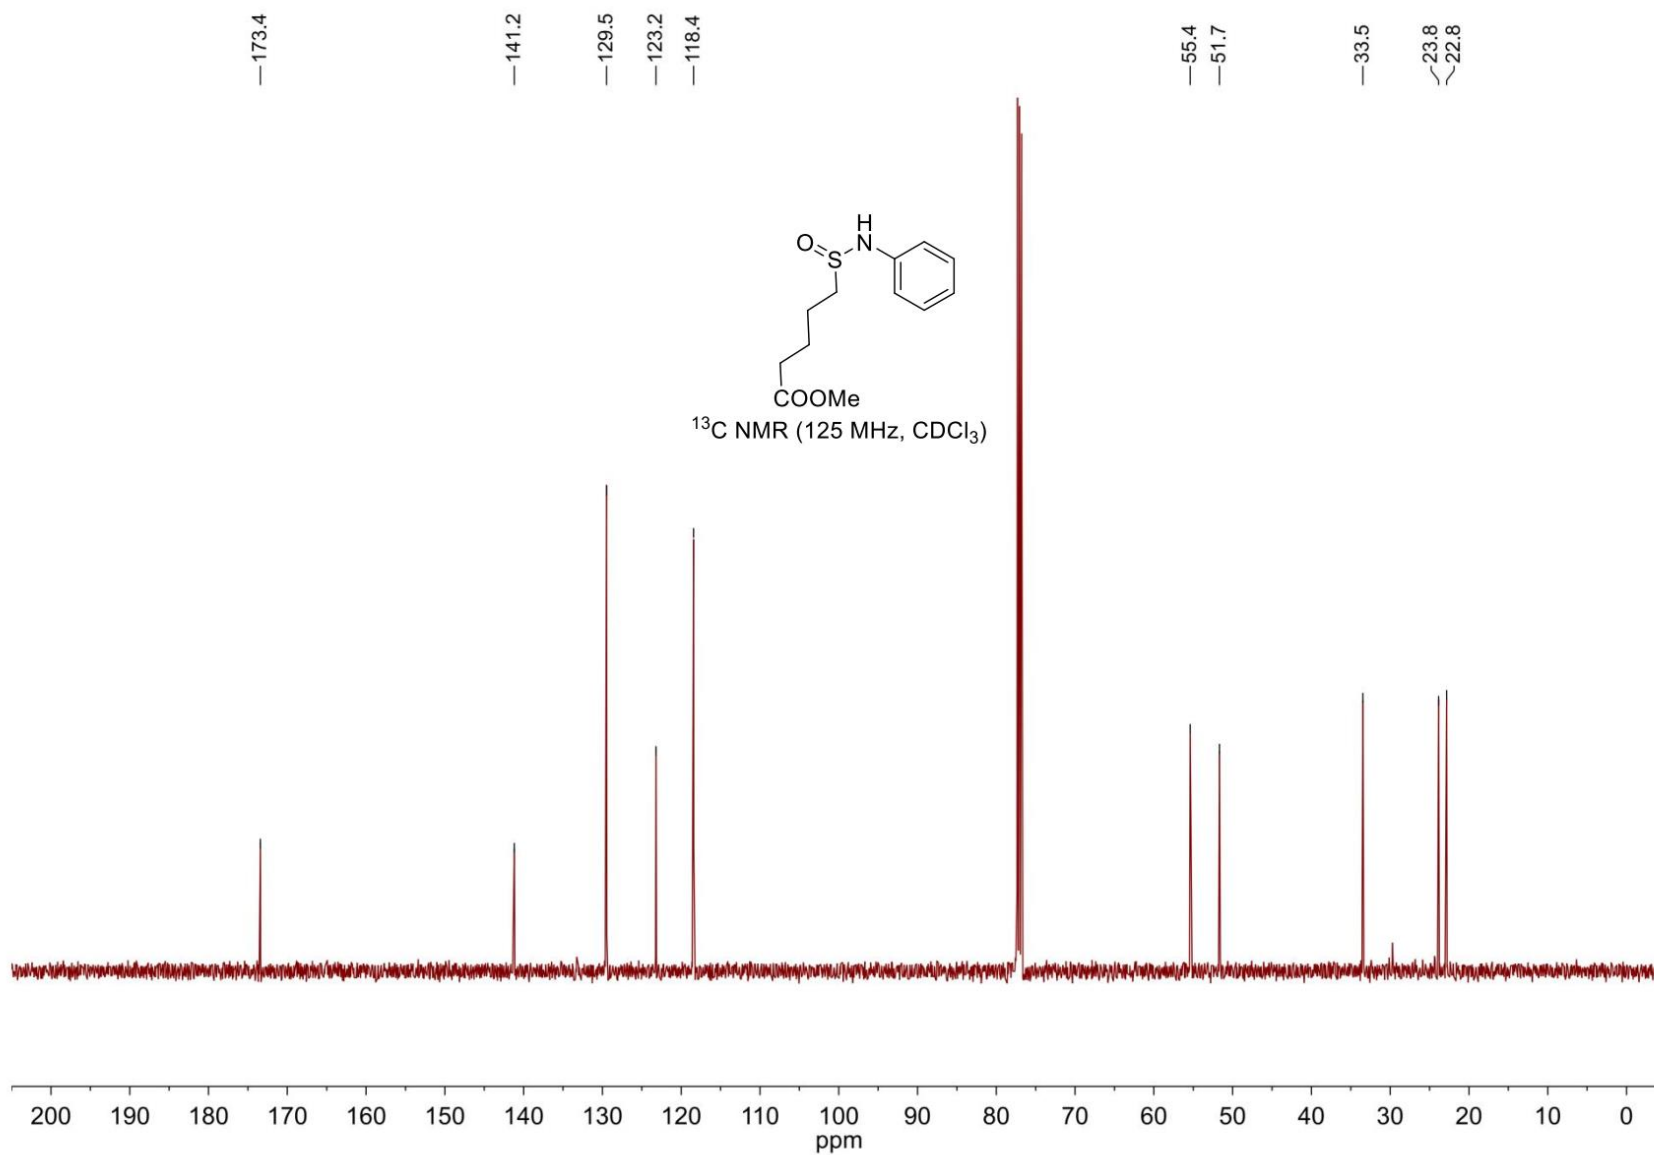

N-Phenyl-3-(thiophen-2-yl)propane-1-sulfonamide (1i)

7.27, 7.26, 7.24, 7.23, 7.17, 7.16, 7.05, 7.04, 6.96, 6.95, 6.94, 6.81, 3.09, 3.08, 3.07, 3.05, 3.03, 3.02, 3.01, 2.99, 2.98, 2.97, 2.95, 2.95, 2.94, 2.92, 2.15, 2.13, 2.12, 2.10, 2.08

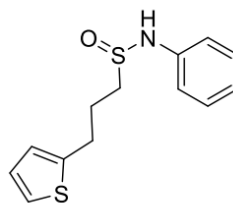

<sup>1</sup>H NMR (500 MHz, CDCl<sub>3</sub>)

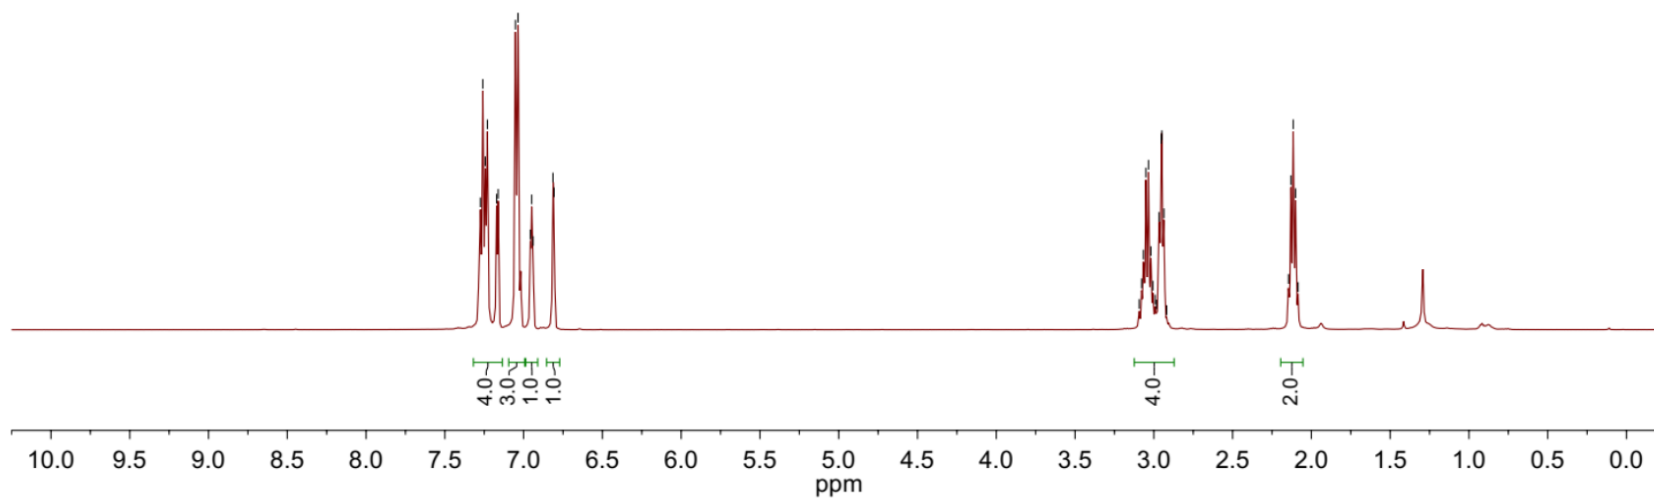

**N-Phenyl-3-(thiophen-2-yl)propane-1-sulfonamide (1i)**

~143.0  
~141.3  
~129.5  
~127.0  
~125.0  
~123.7  
~123.1  
~118.2

—54.7

—28.6  
—25.4

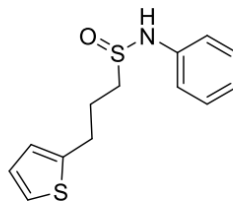

<sup>13</sup>C NMR (125 MHz, CDCl<sub>3</sub>)

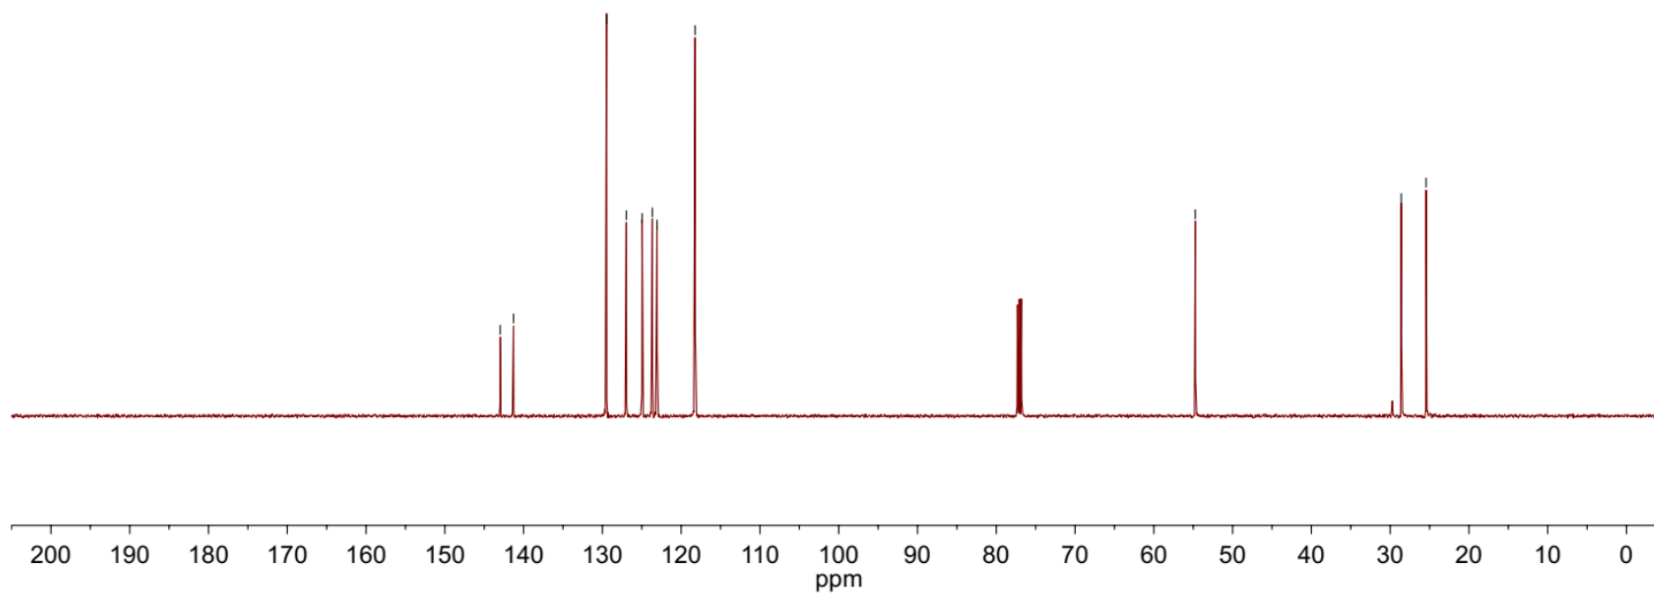

### 4,4-Difluoro-N-phenylcyclohexane-1-sulfonamide (1j)

7.30  
7.28  
7.28  
7.27  
7.11  
7.07  
7.06  
7.05  
7.04  
2.98  
2.97  
2.96  
2.95  
2.94  
2.94  
2.93  
2.23  
2.22  
2.21  
2.21  
2.20  
2.19  
2.19  
2.18  
2.17  
2.16  
2.15  
2.15  
2.14  
2.14  
2.13  
2.13  
2.12  
2.12  
1.96  
1.95  
1.94  
1.93  
1.93  
1.91  
1.88  
1.88  
1.87  
1.86  
1.85  
1.84  
1.83  
1.82  
1.82  
1.81  
1.81  
1.80  
1.79  
1.78  
1.77  
1.77  
1.75  
1.74  
1.73  
1.72  
1.71  
1.71  
1.70  
1.69  
1.68  
1.66  
1.65  
1.64

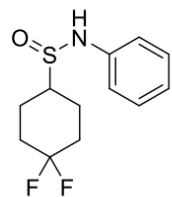

<sup>1</sup>H NMR (500 MHz, CDCl<sub>3</sub>)

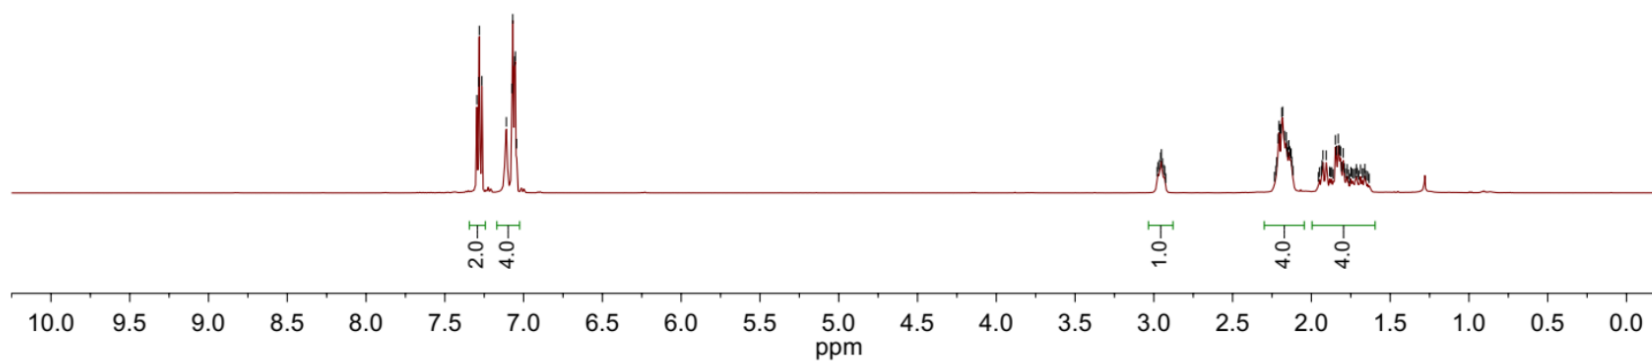



### 4,4-Difluoro-N-phenylcyclohexane-1-sulfonamide (1j)

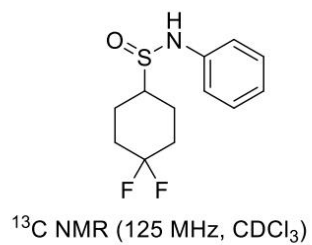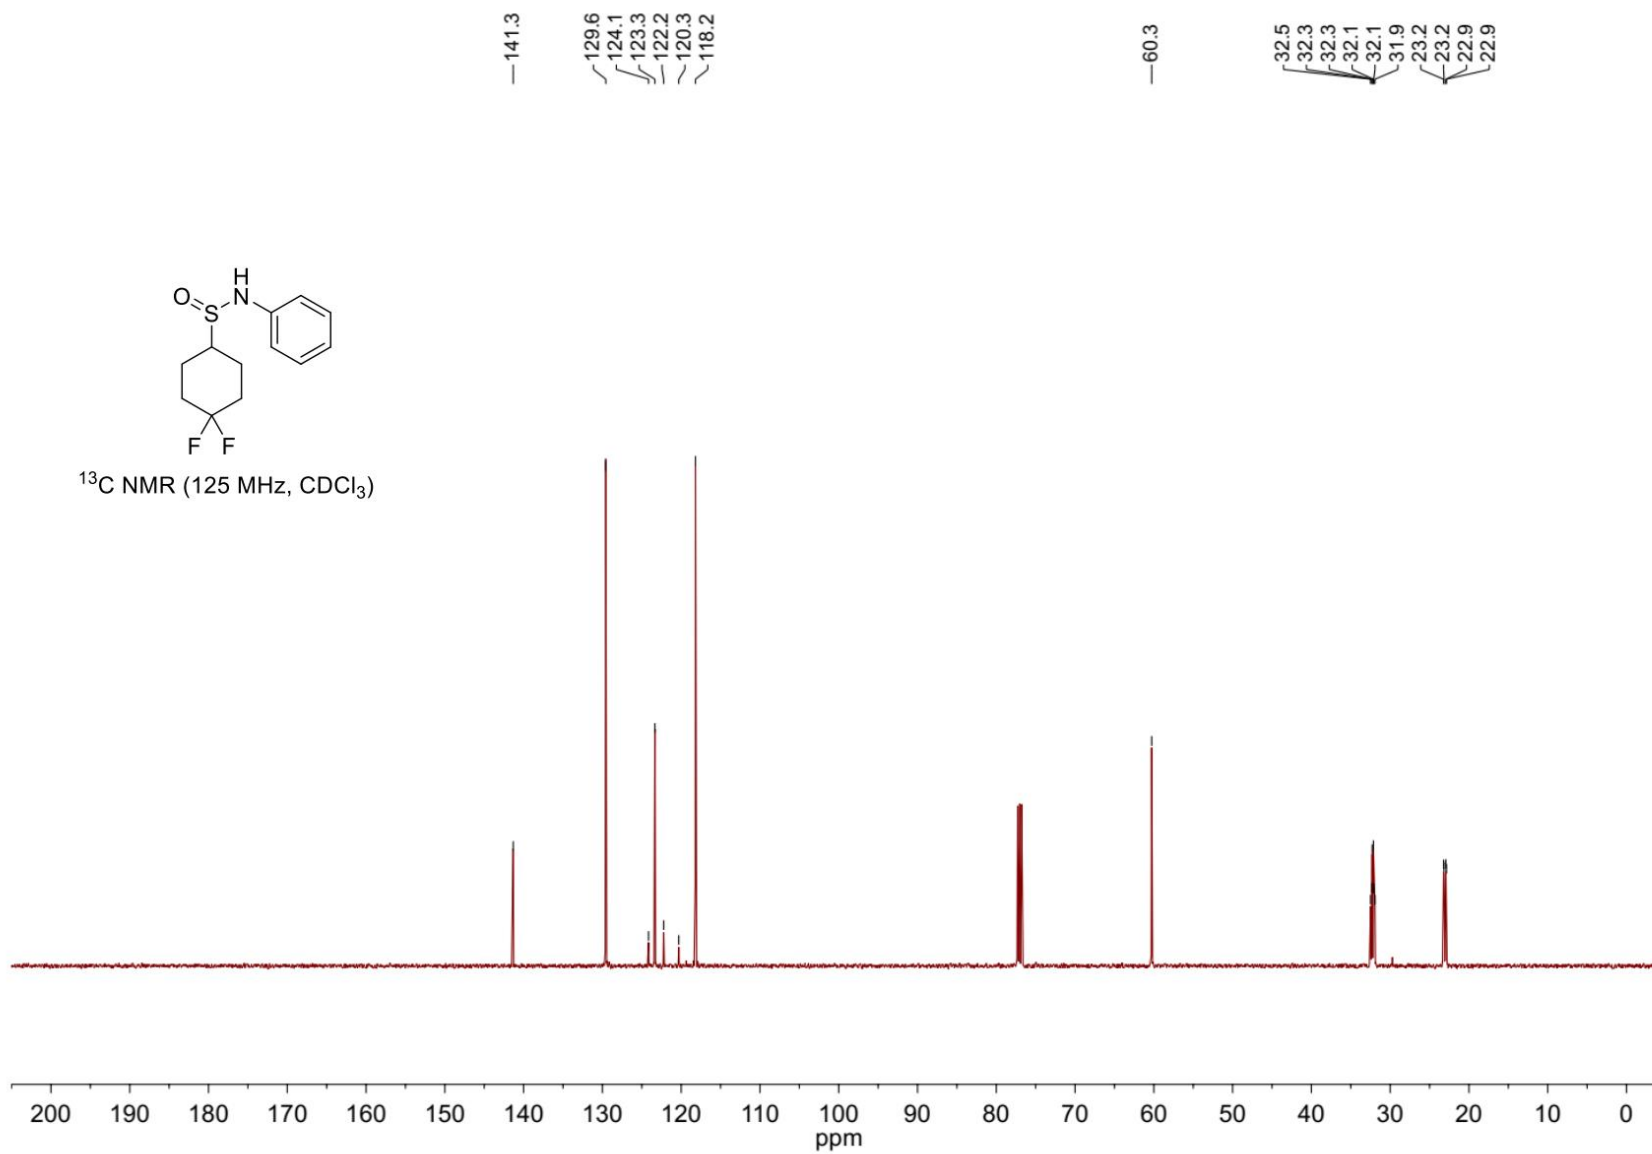

### N-Phenylcycloheptanesulfinamide (1k)

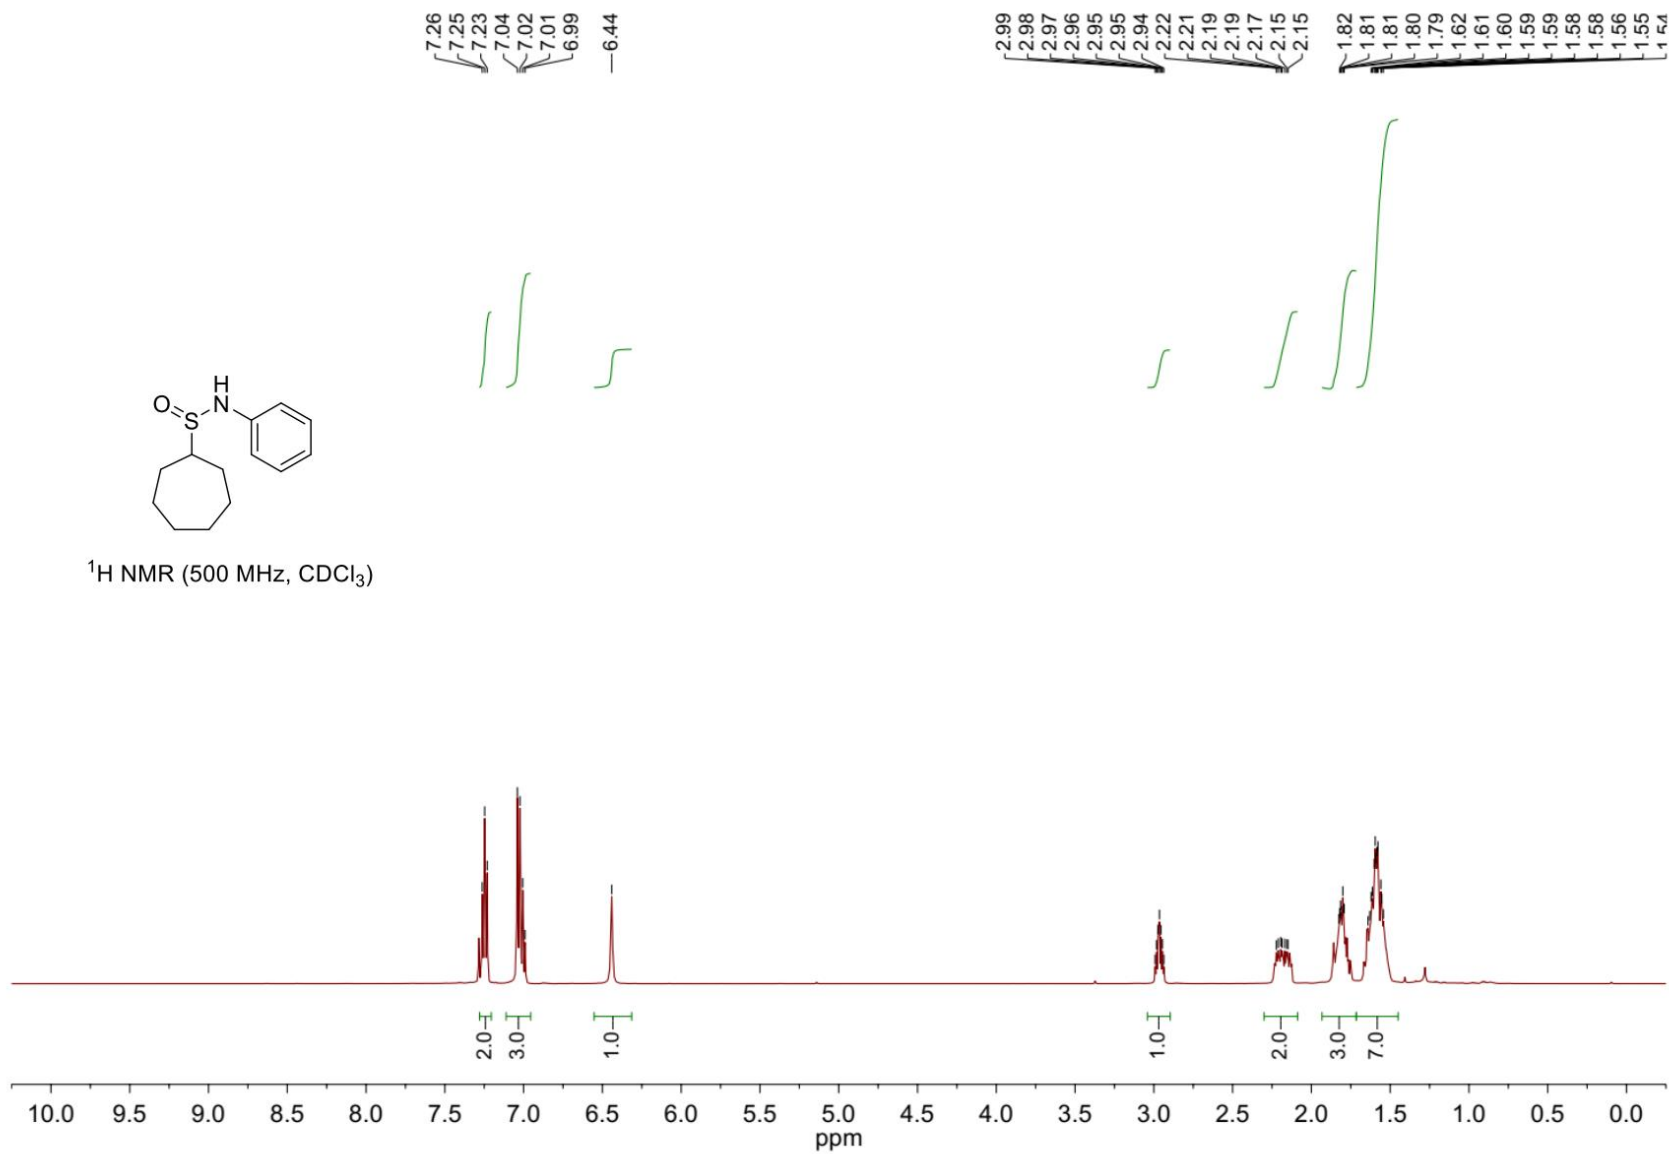

# N-Phenylcycloheptanesulfinamide (1k)

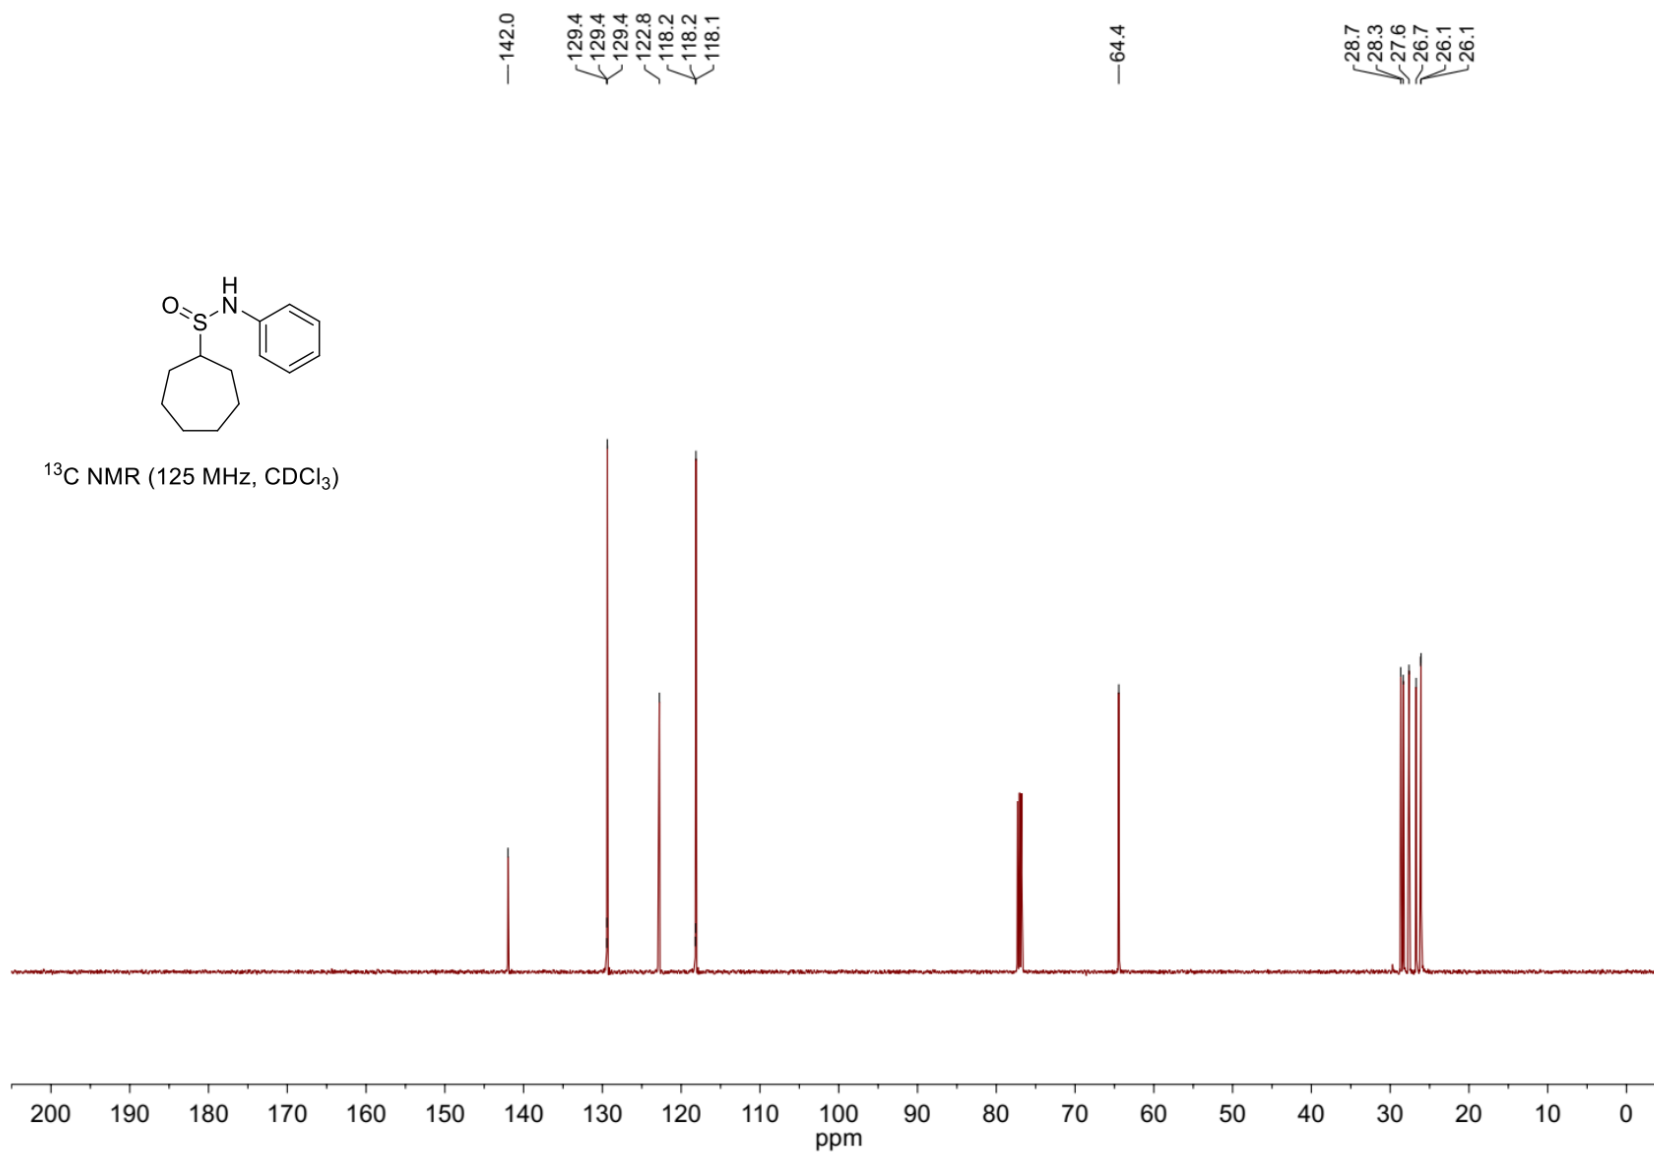

# N-Phenylcyclopent-3-ene-1-sulfonamide (11)

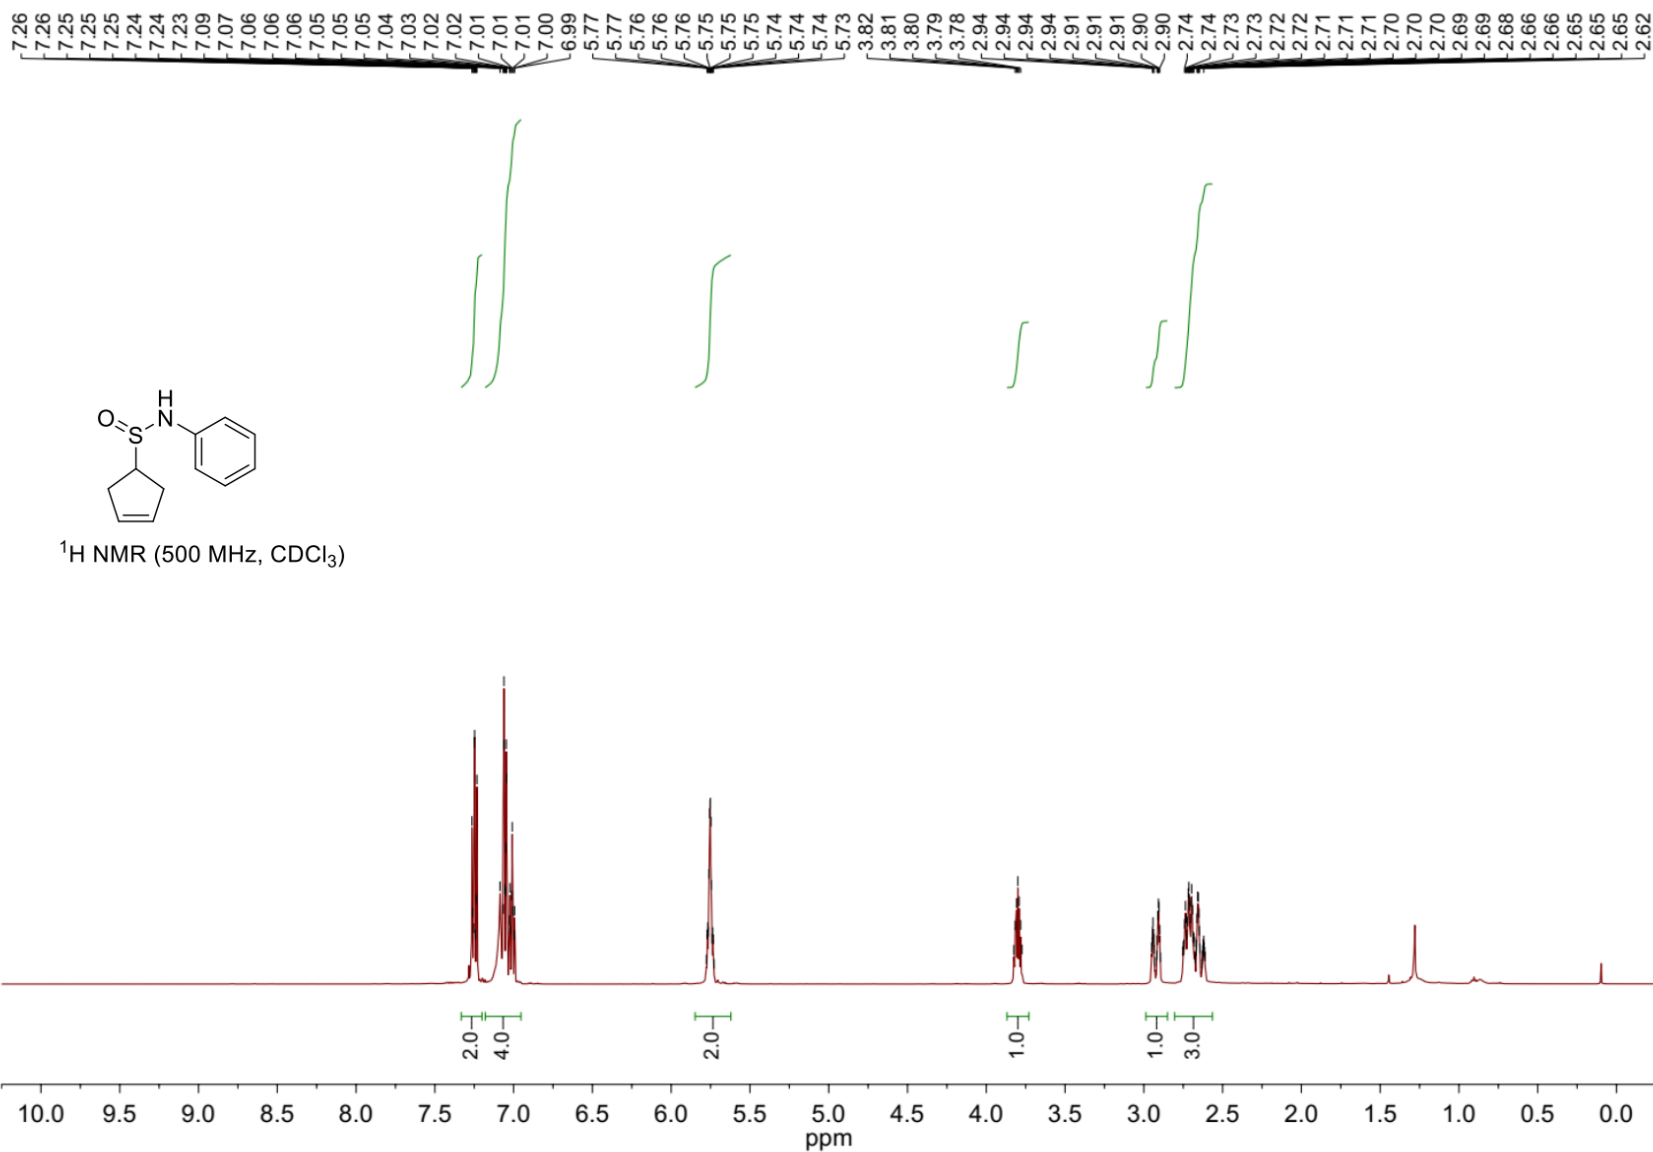

# N-Phenylcyclopent-3-ene-1-sulfonamide (11)

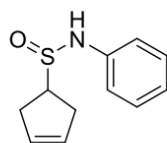

$^{13}\text{C}$  NMR (125 MHz,  $\text{CDCl}_3$ )

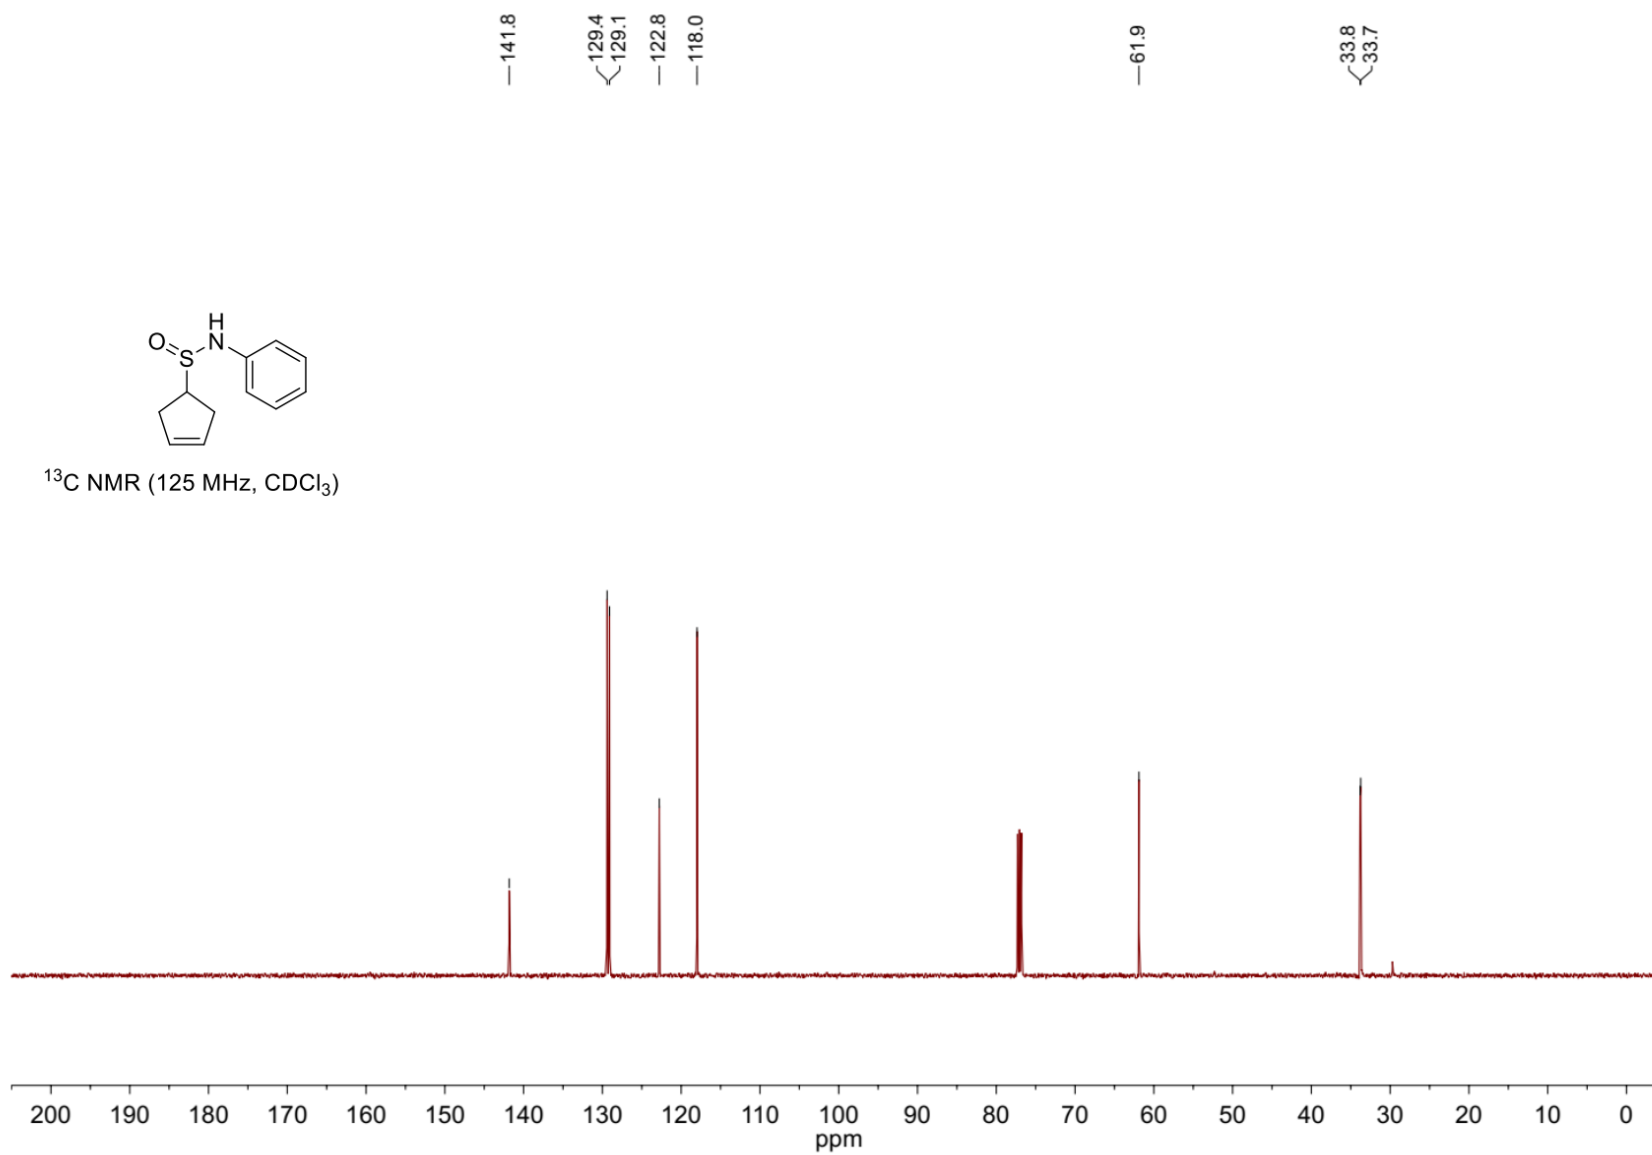

### N-Phenyl-2,3-dihydro-1H-indene-2-sulfinamide (1m)

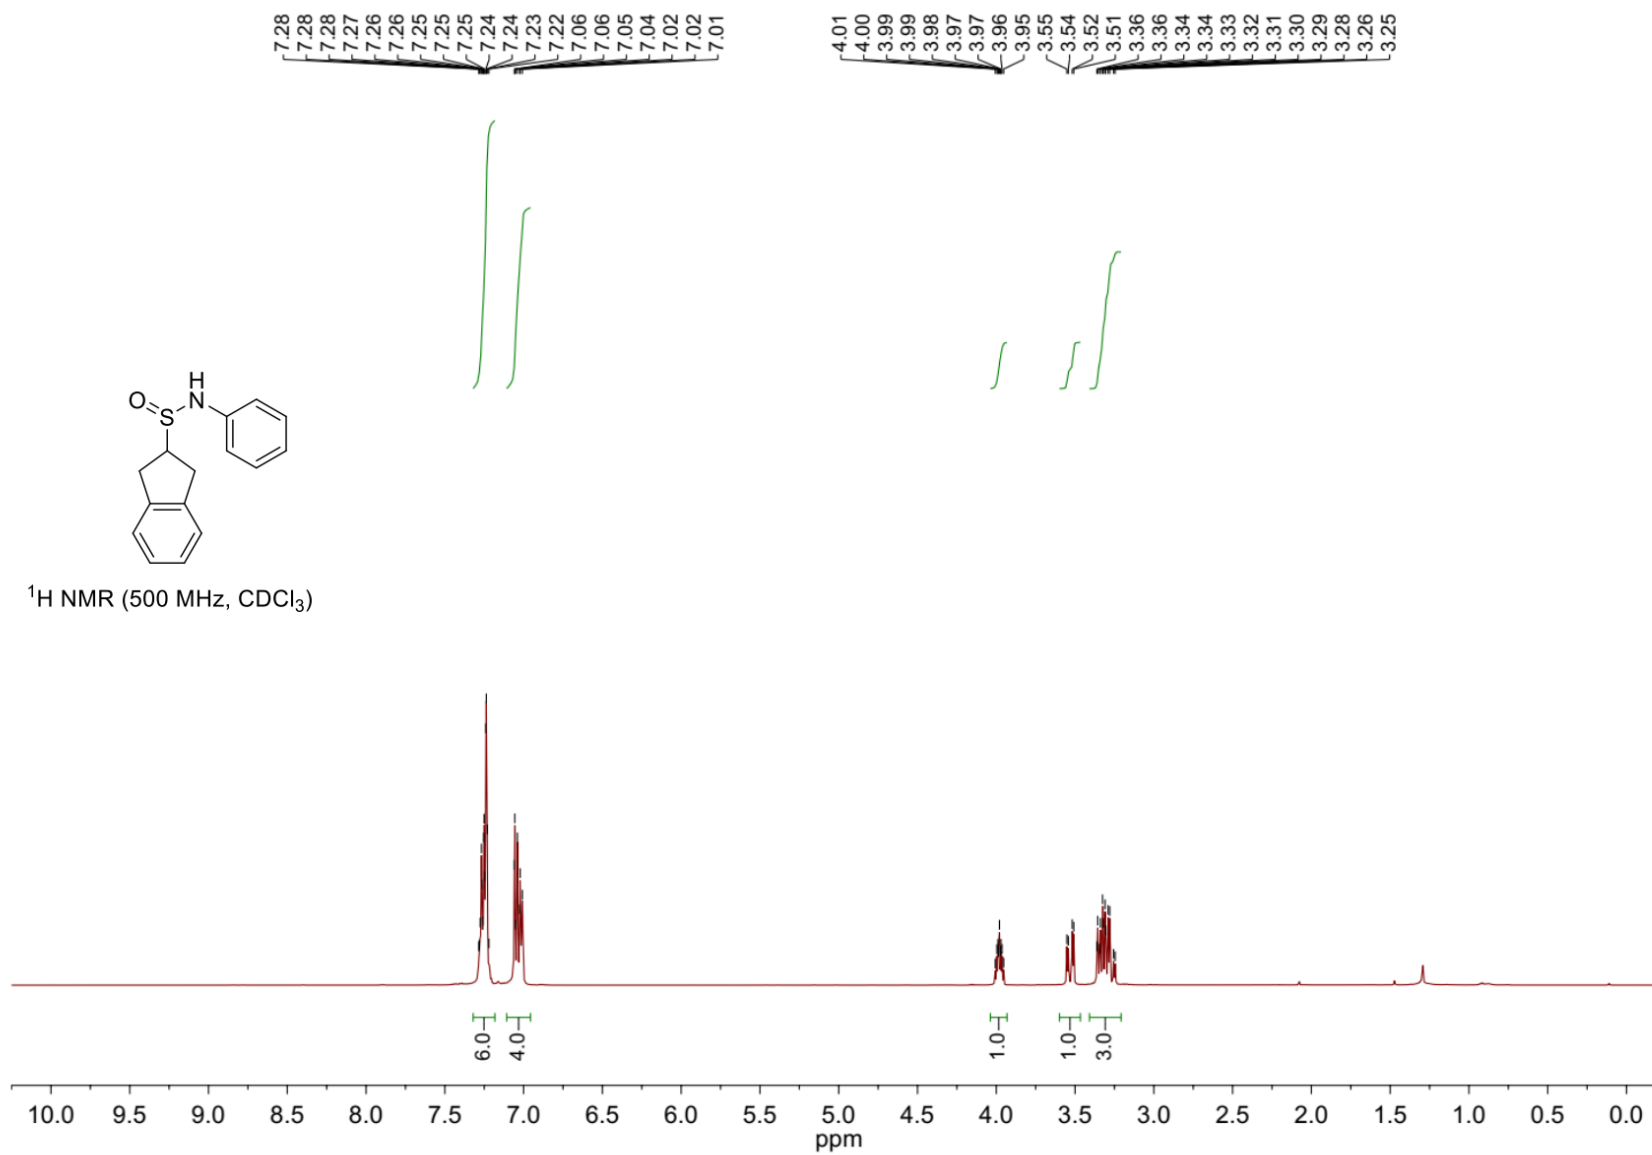

***N*-Phenyl-2,3-dihydro-1*H*-indene-2-sulfinamide (1m)**

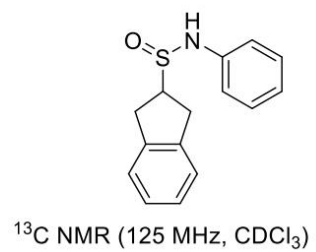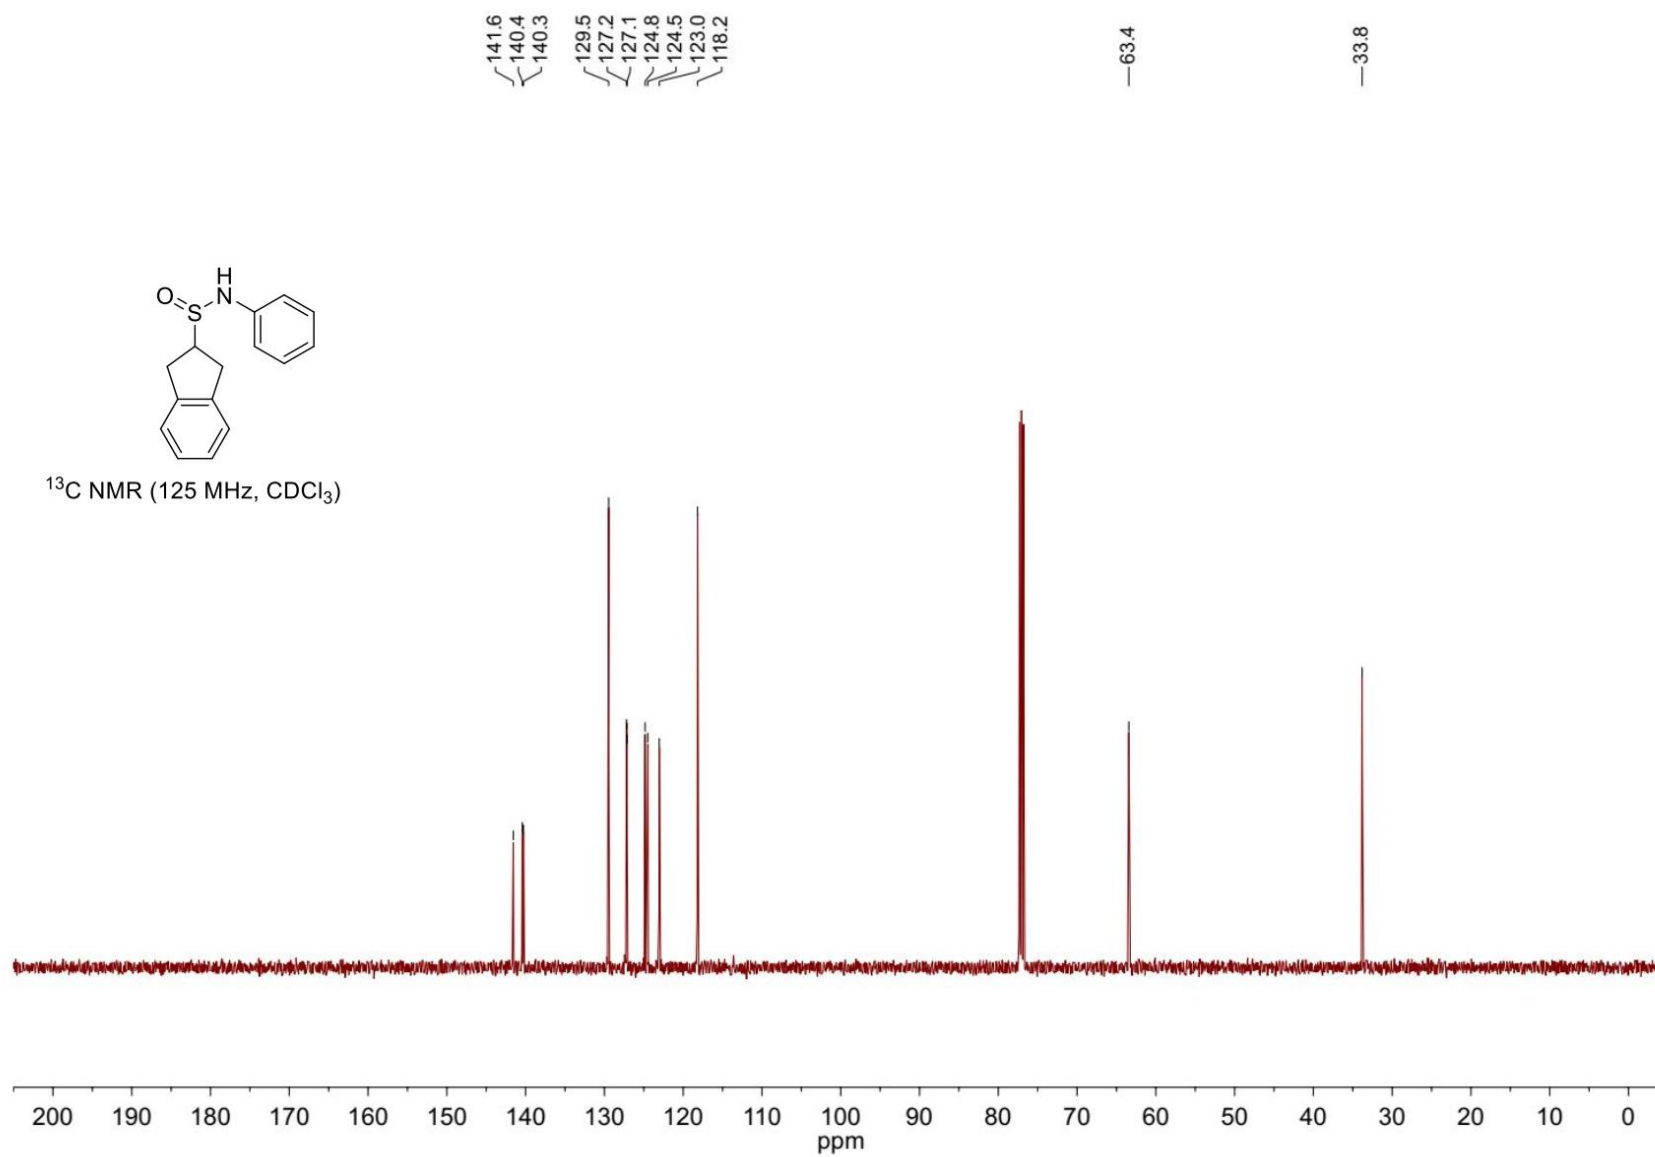

# N-Phenyltetrahydro-2H-pyran-4-sulfonamide (1n)

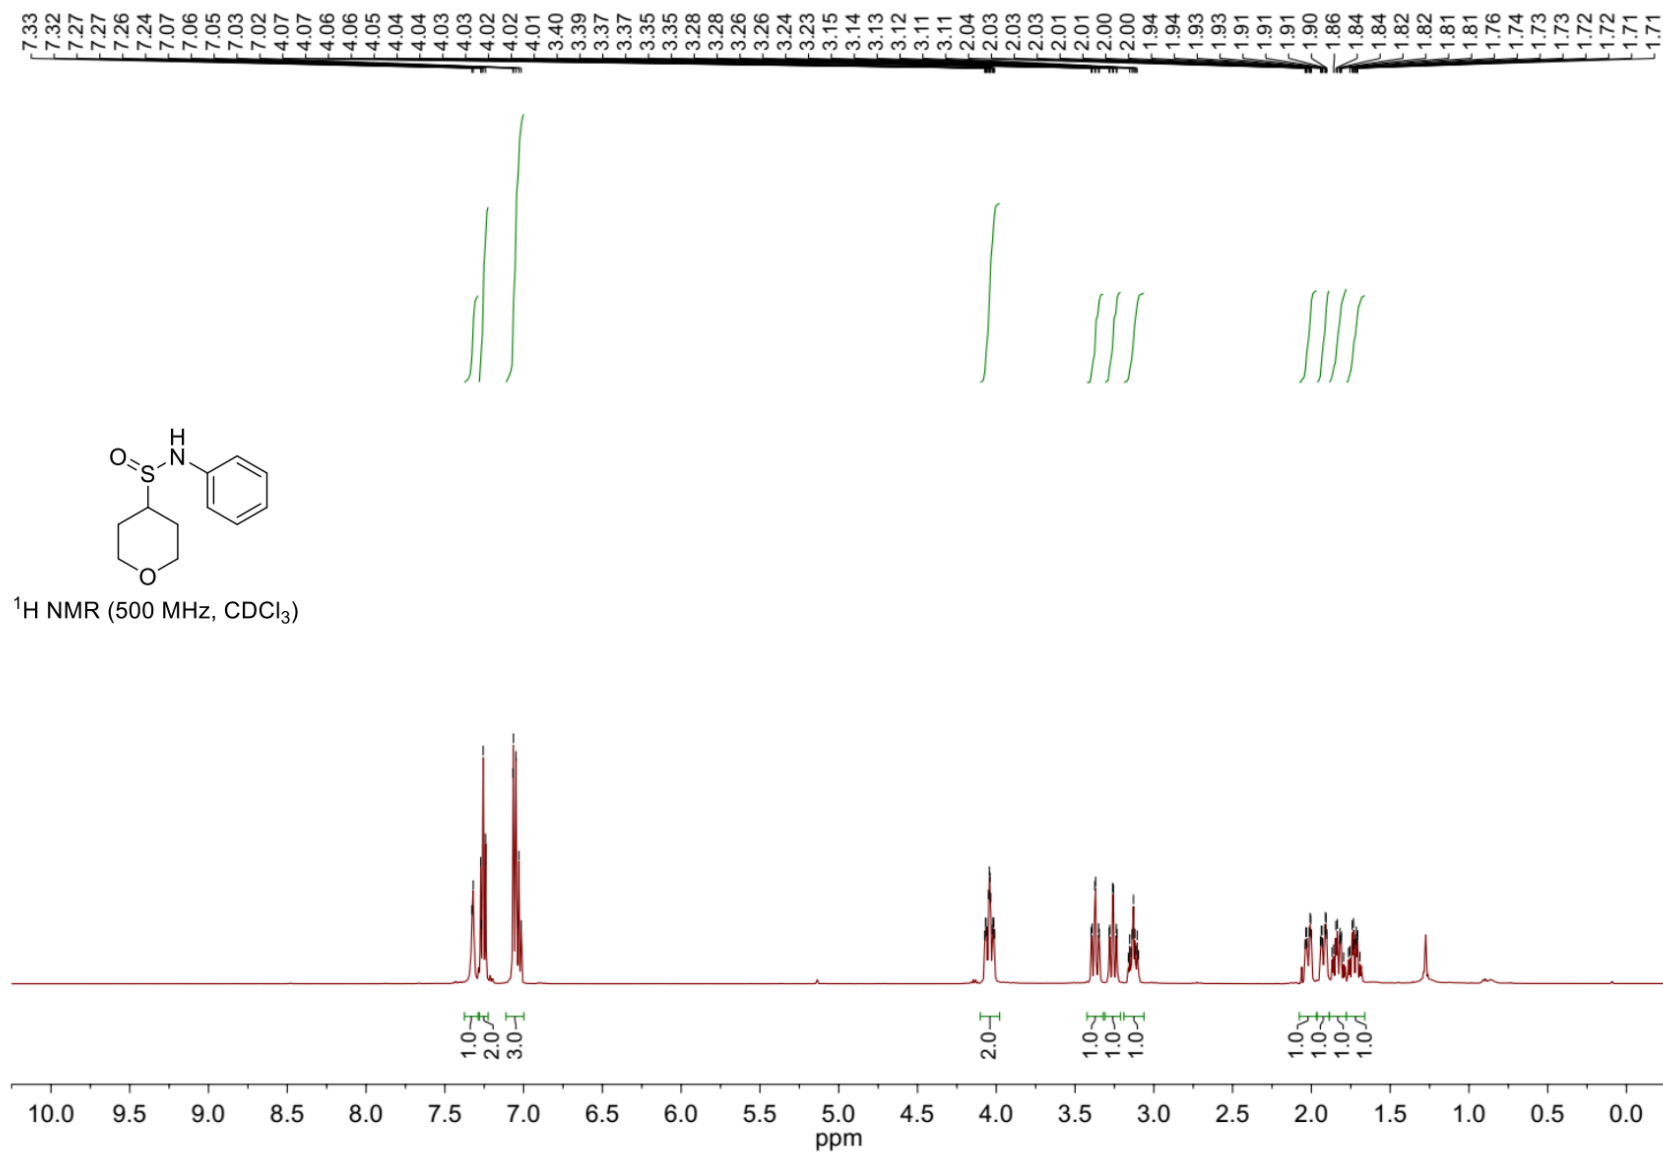



# N-Phenyltetrahydro-2H-pyran-4-sulfonamide (1n)

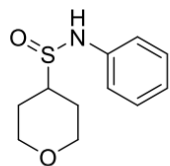

$^{13}\text{C}$  NMR (125 MHz,  $\text{CDCl}_3$ )

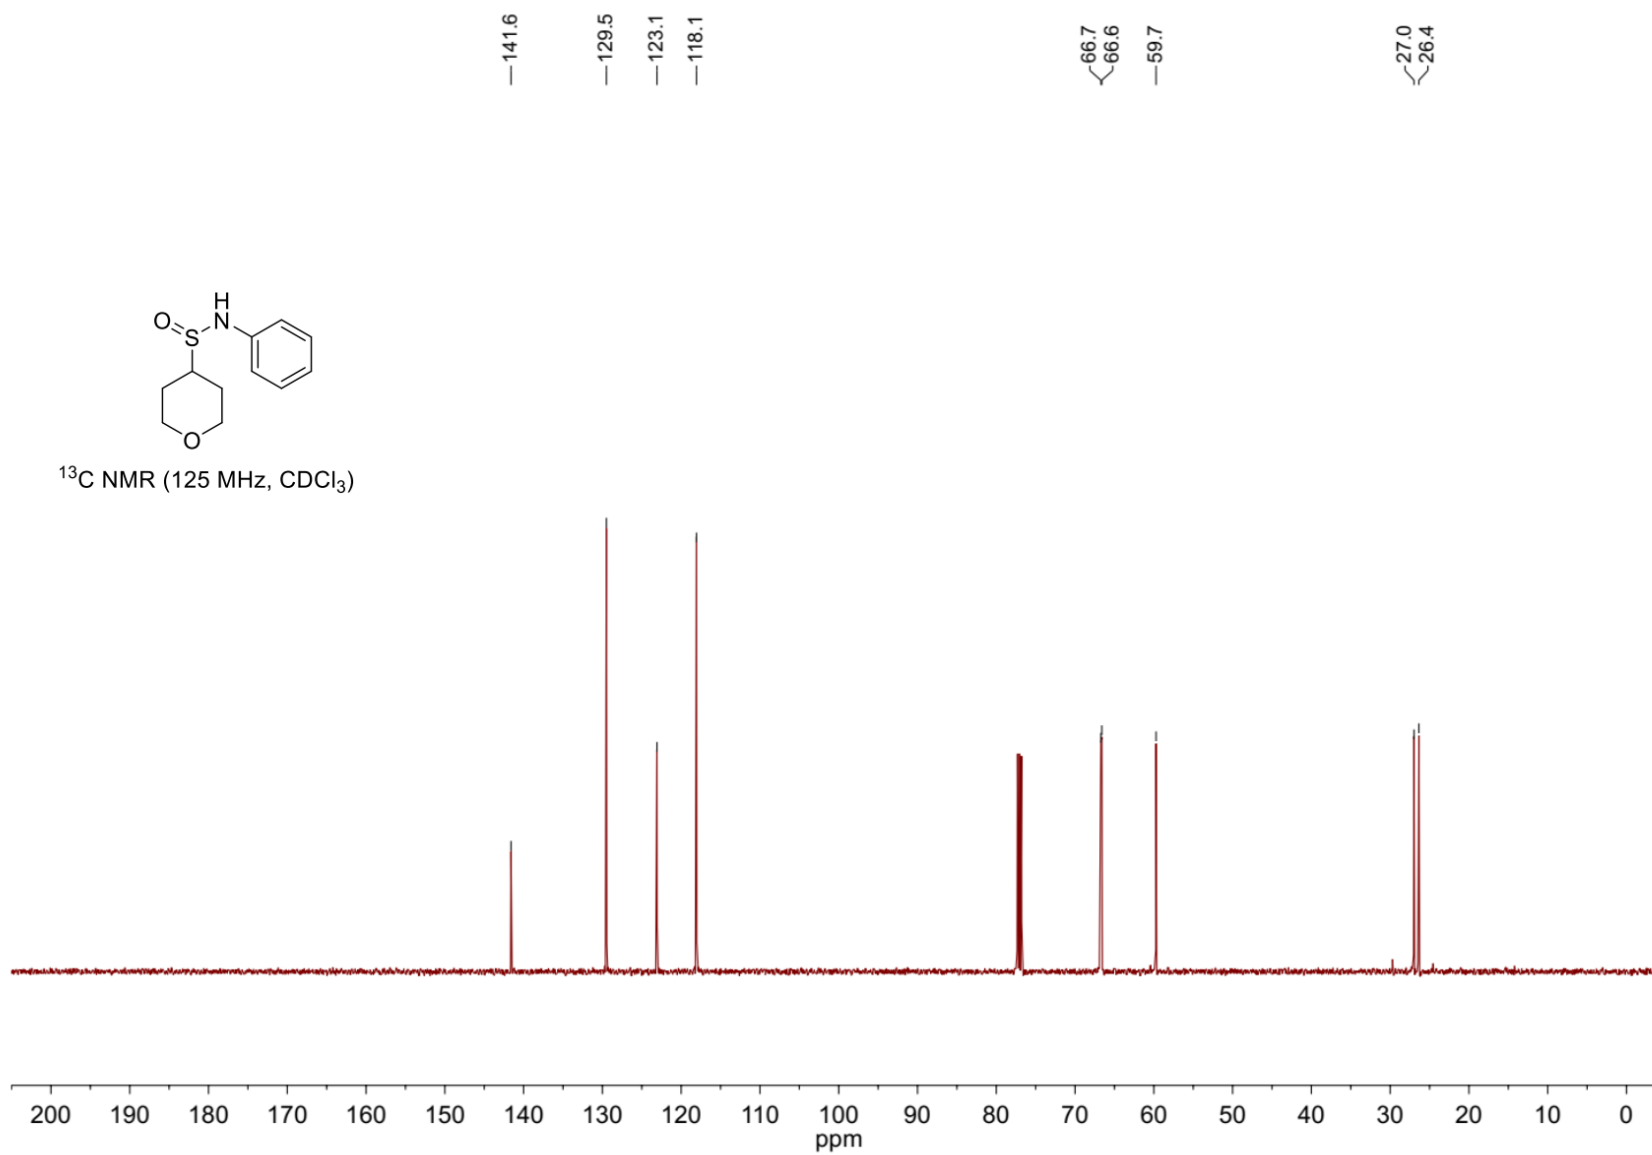

### Tert-butyl 3-((phenylamino)sulfinyl)piperidine-1-carboxylate (1o)

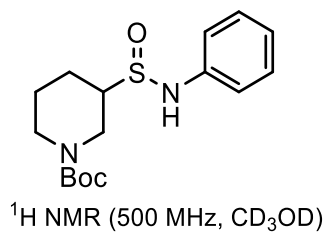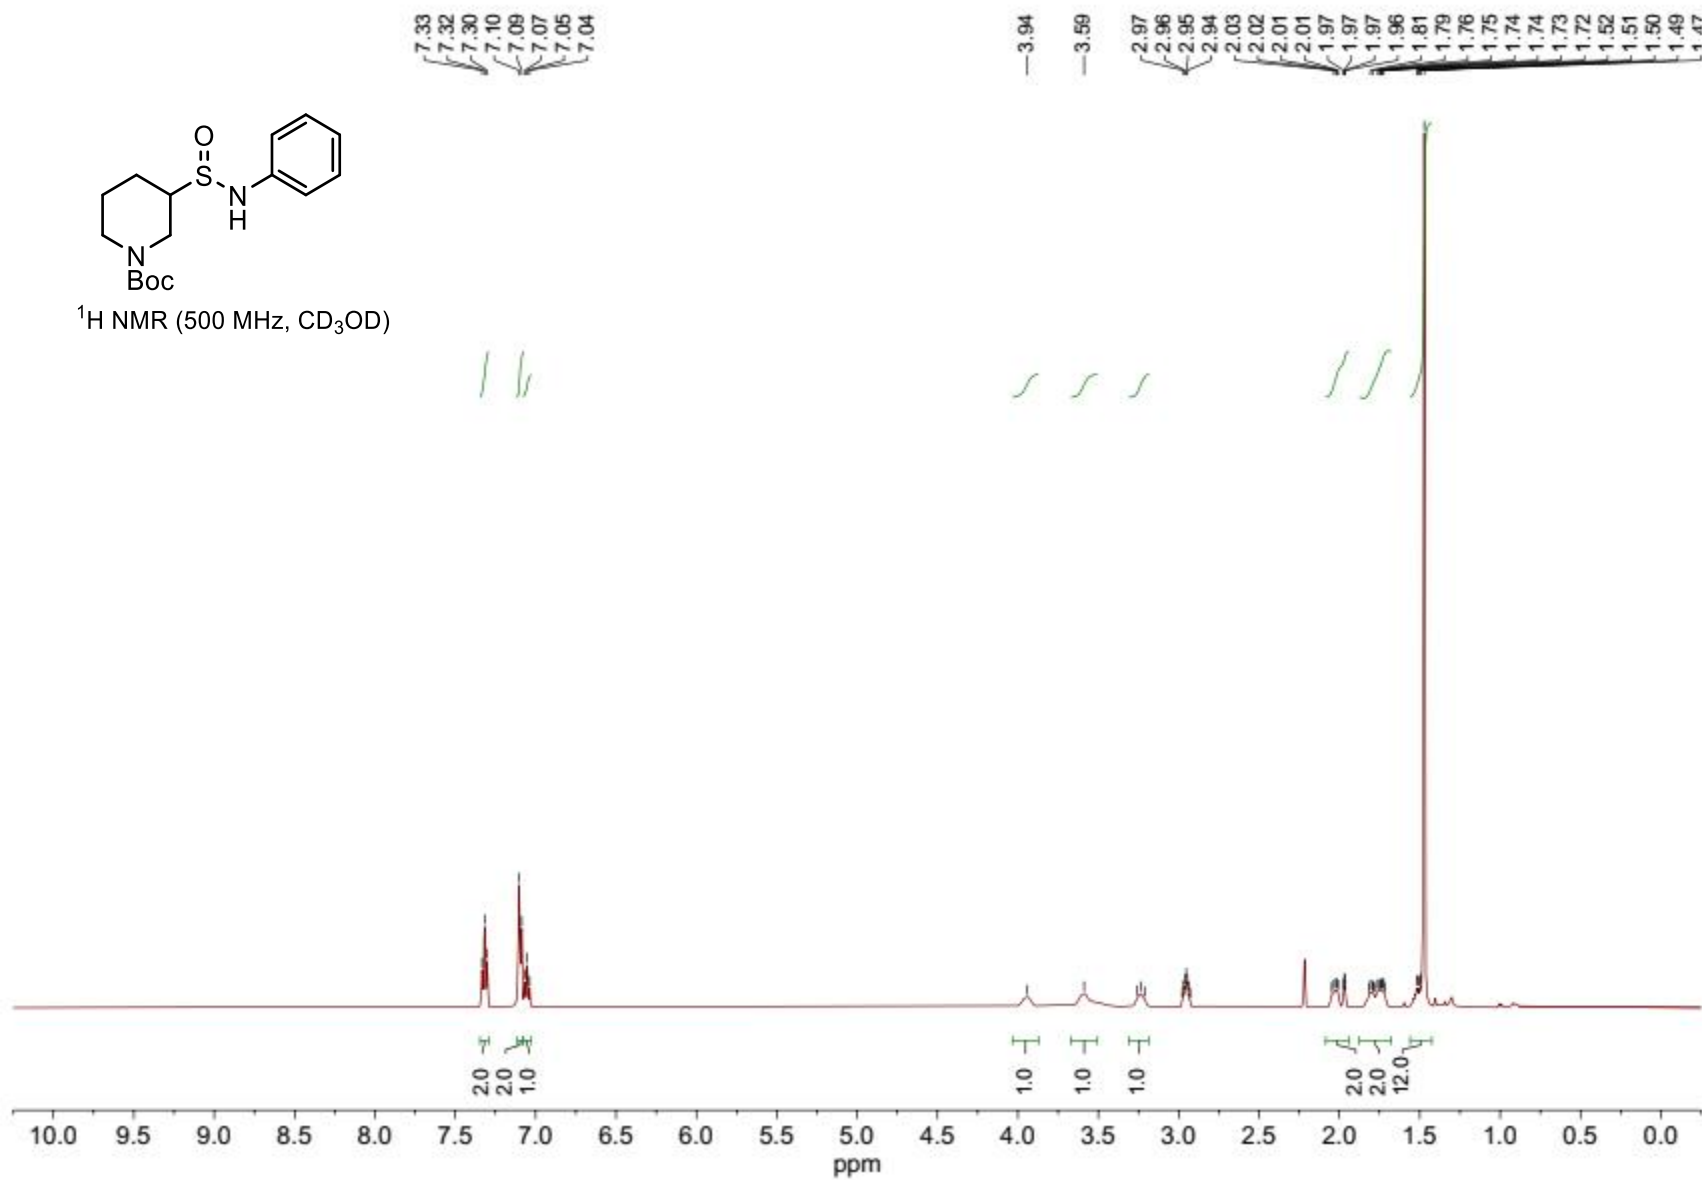

Tert-butyl 3-((phenylamino)sulfinyl)piperidine-1-carboxylate (1o)

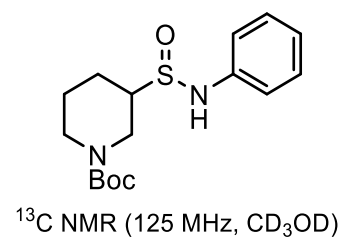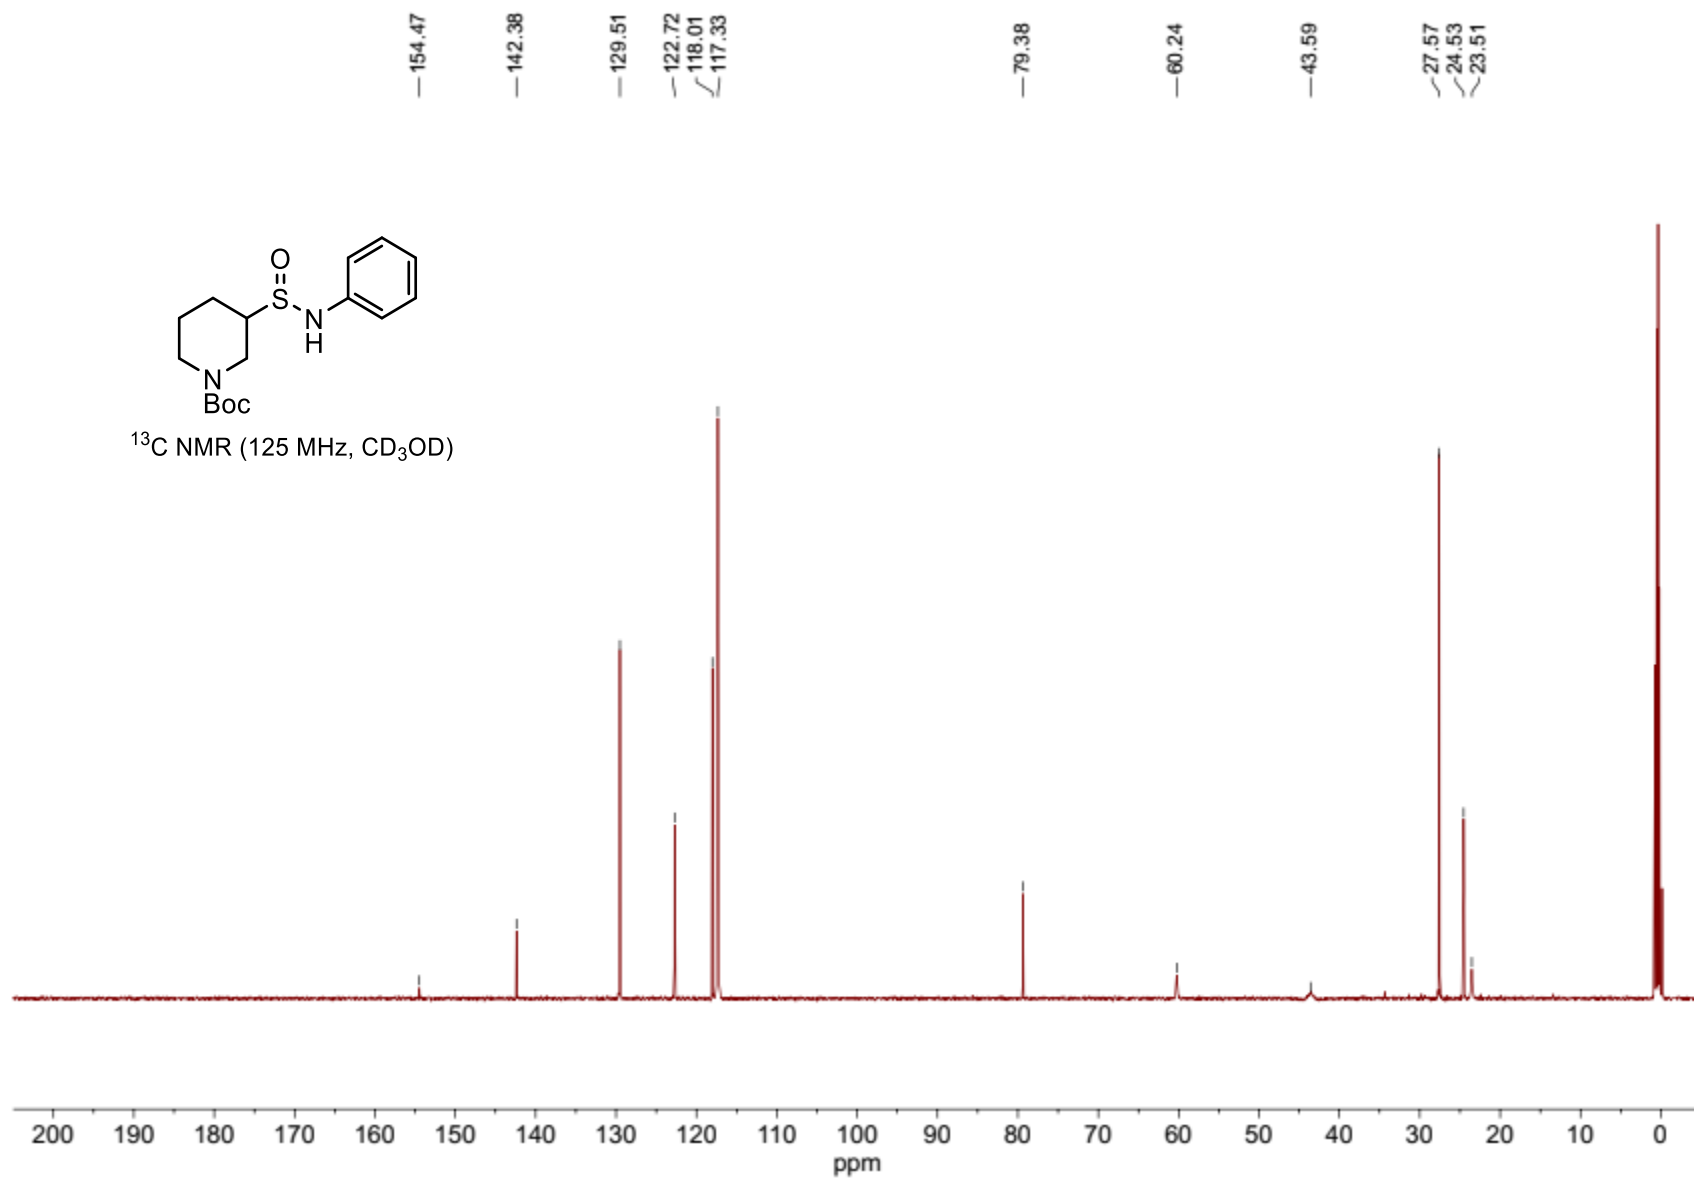

(3s,5s,7s)-N-Phenyladamantane-1-sulfinamide (1p)

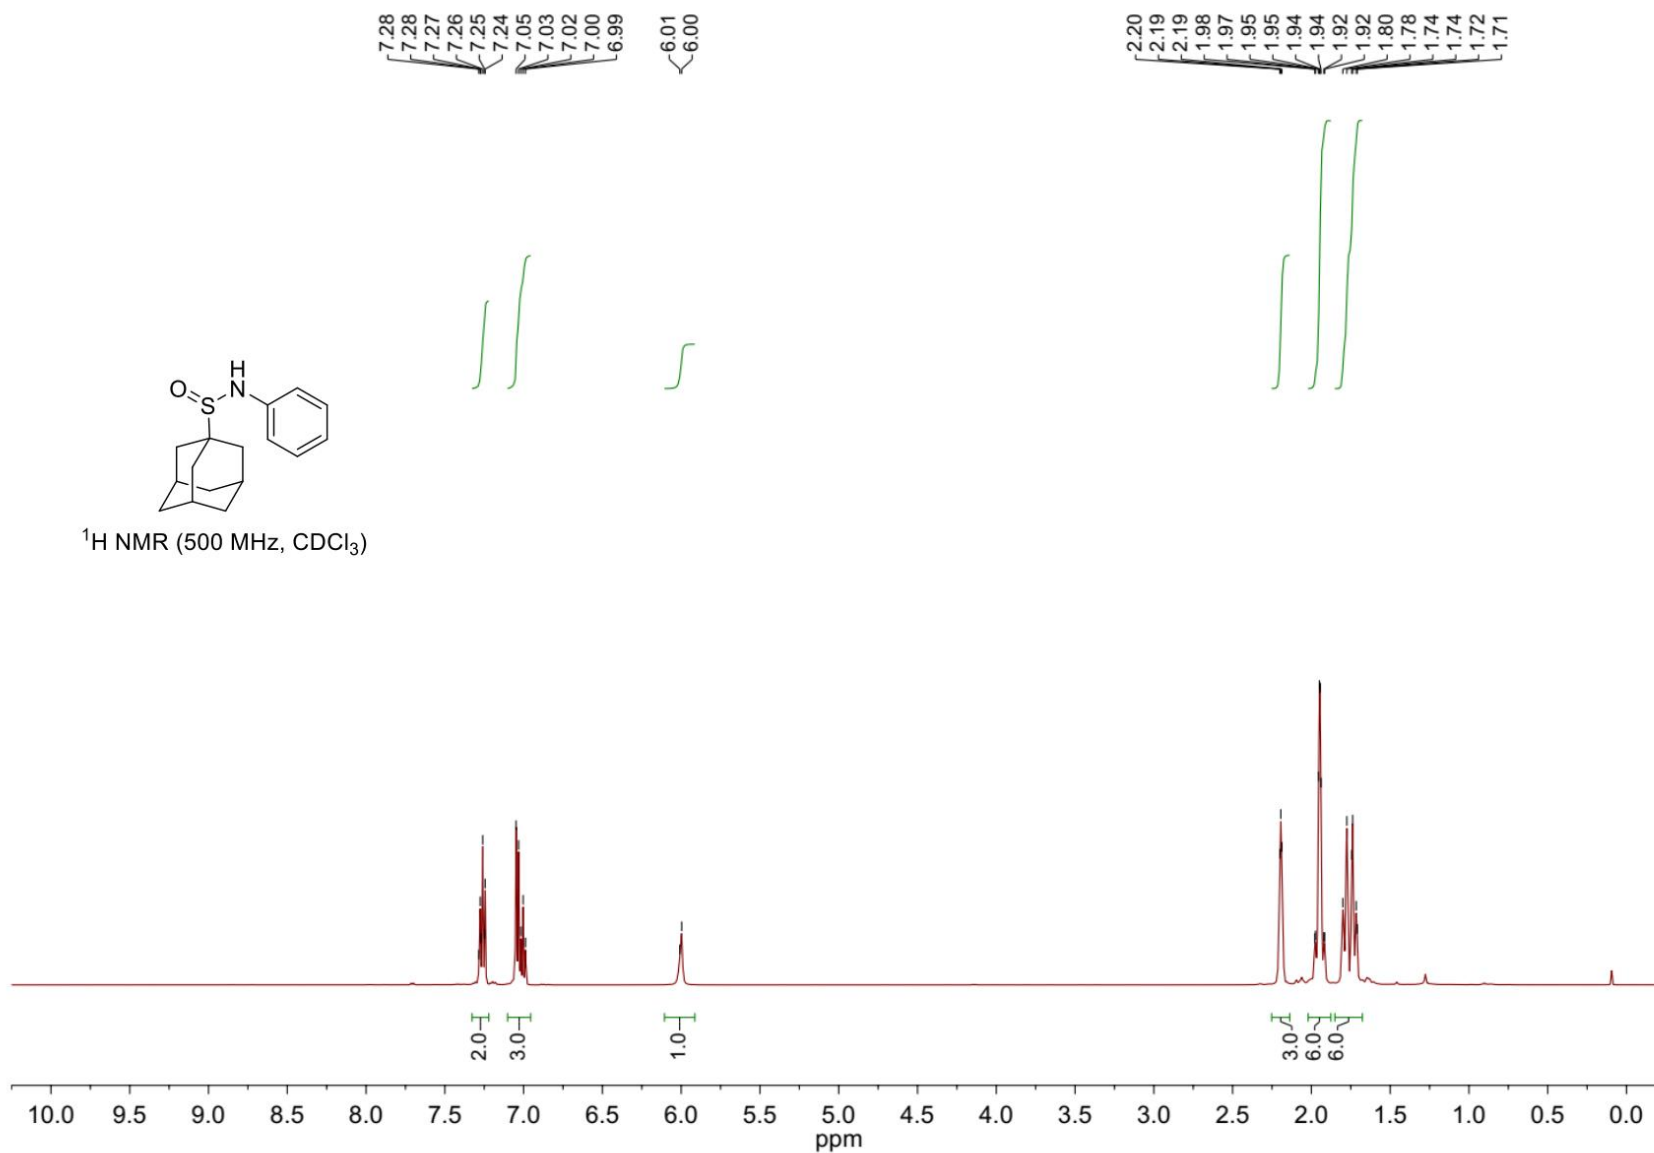

(3s,5s,7s)-N-Phenyladamantane-1-sulfinamide (1p)

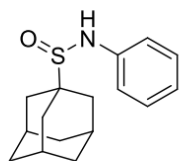

$^{13}\text{C}$  NMR (125 MHz,  $\text{CDCl}_3$ )

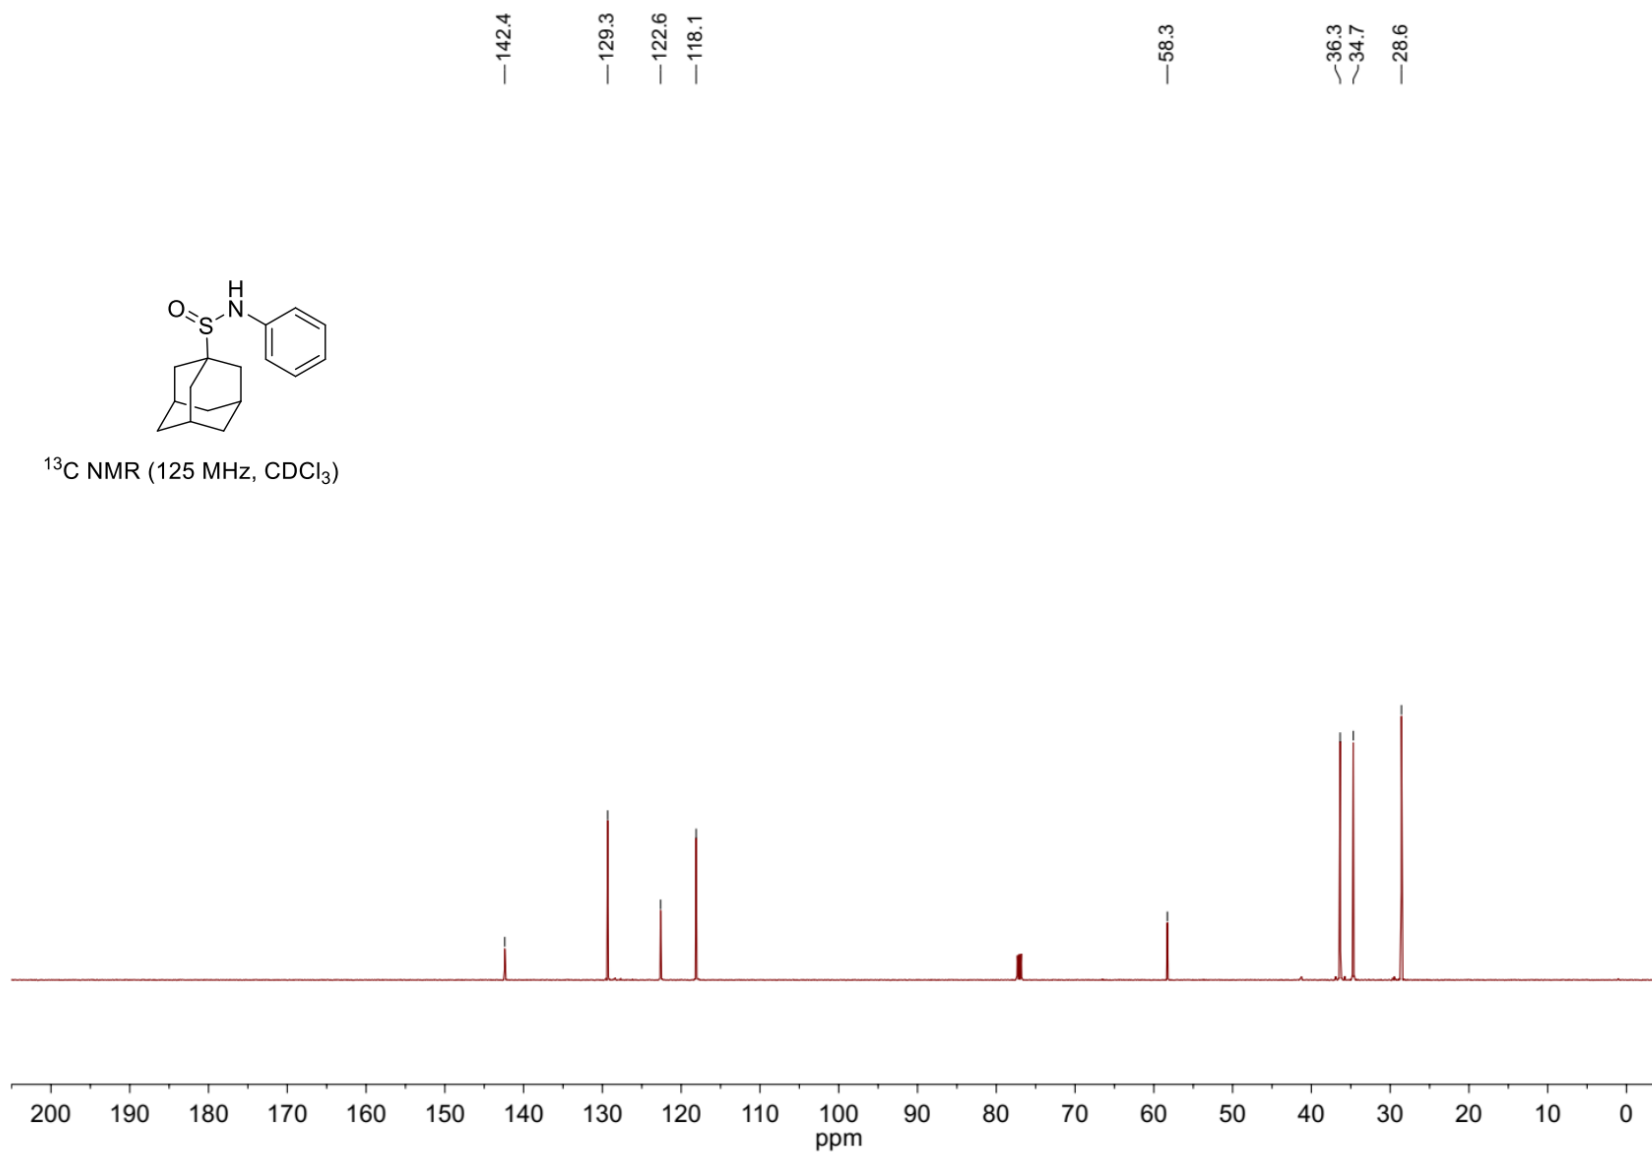

### 3-Methyl-N-phenyloxetane-3-sulfinamide (1q)

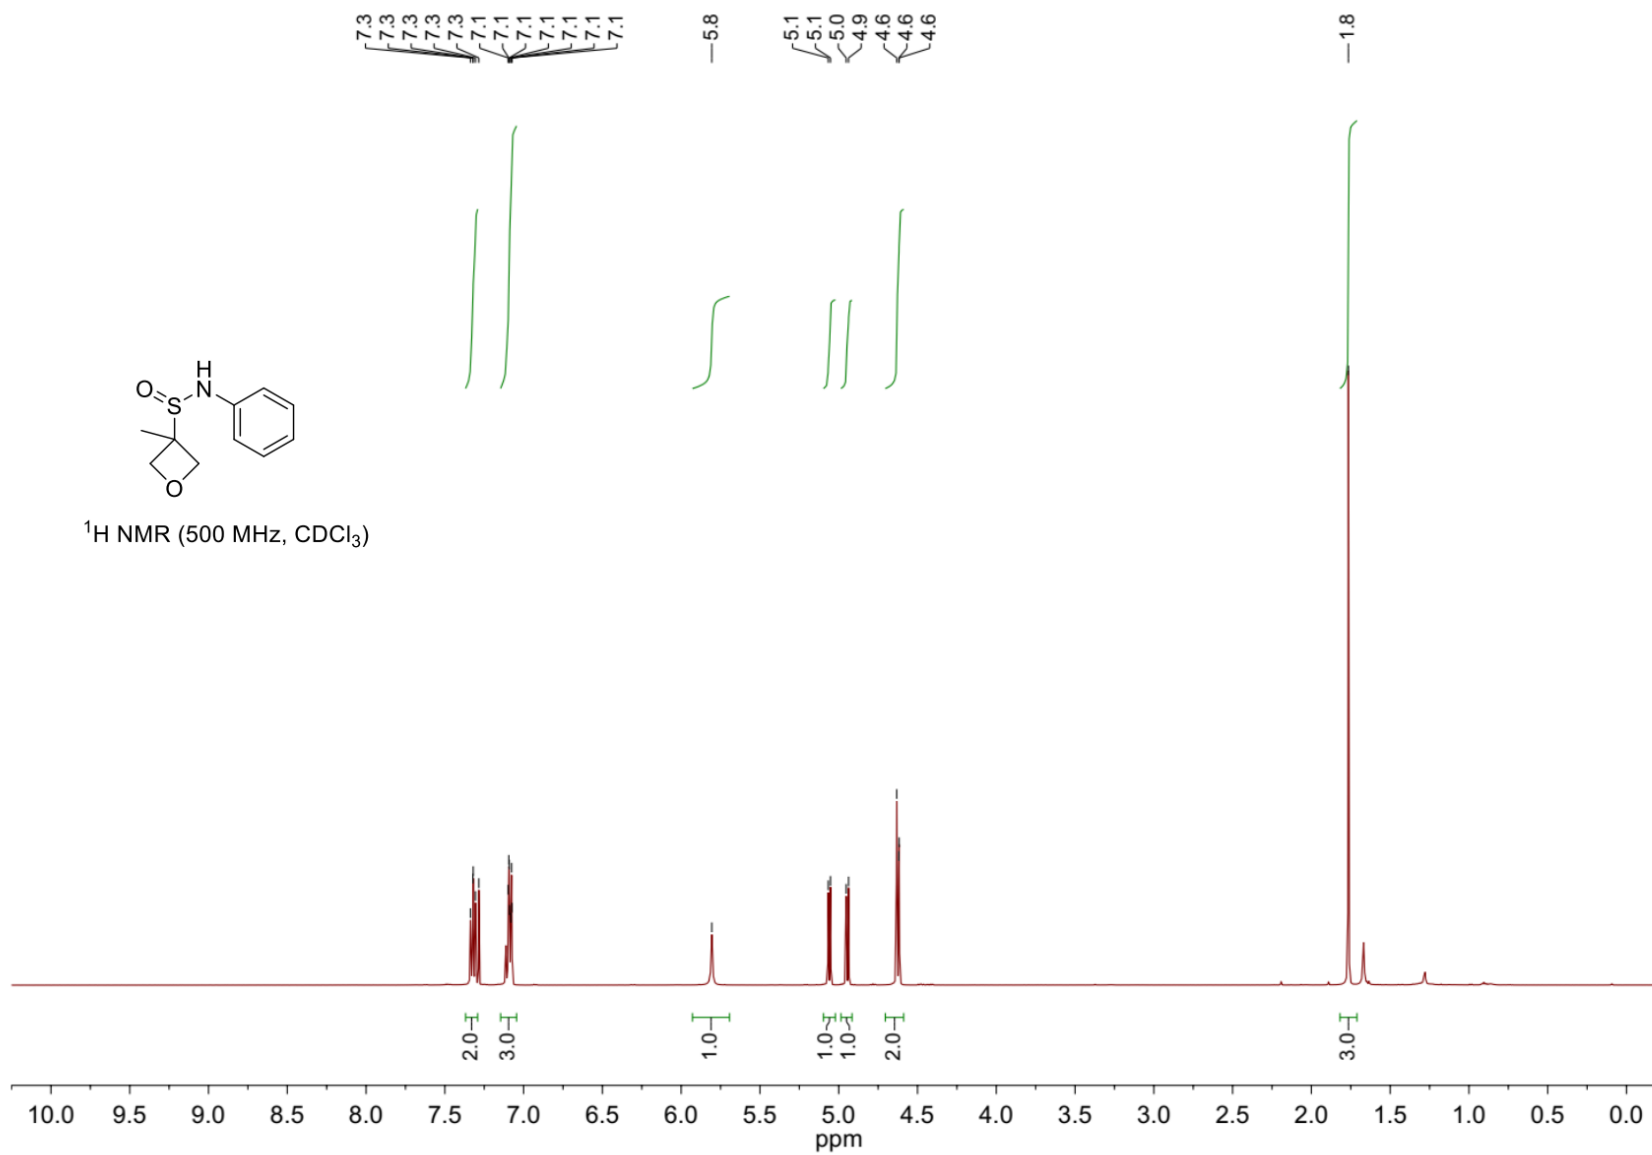

### 3-Methyl-N-phenyloxetane-3-sulfonamide (1q)

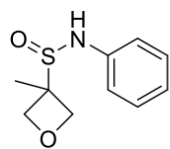

$^{13}\text{C}$  NMR (125 MHz,  $\text{CDCl}_3$ )

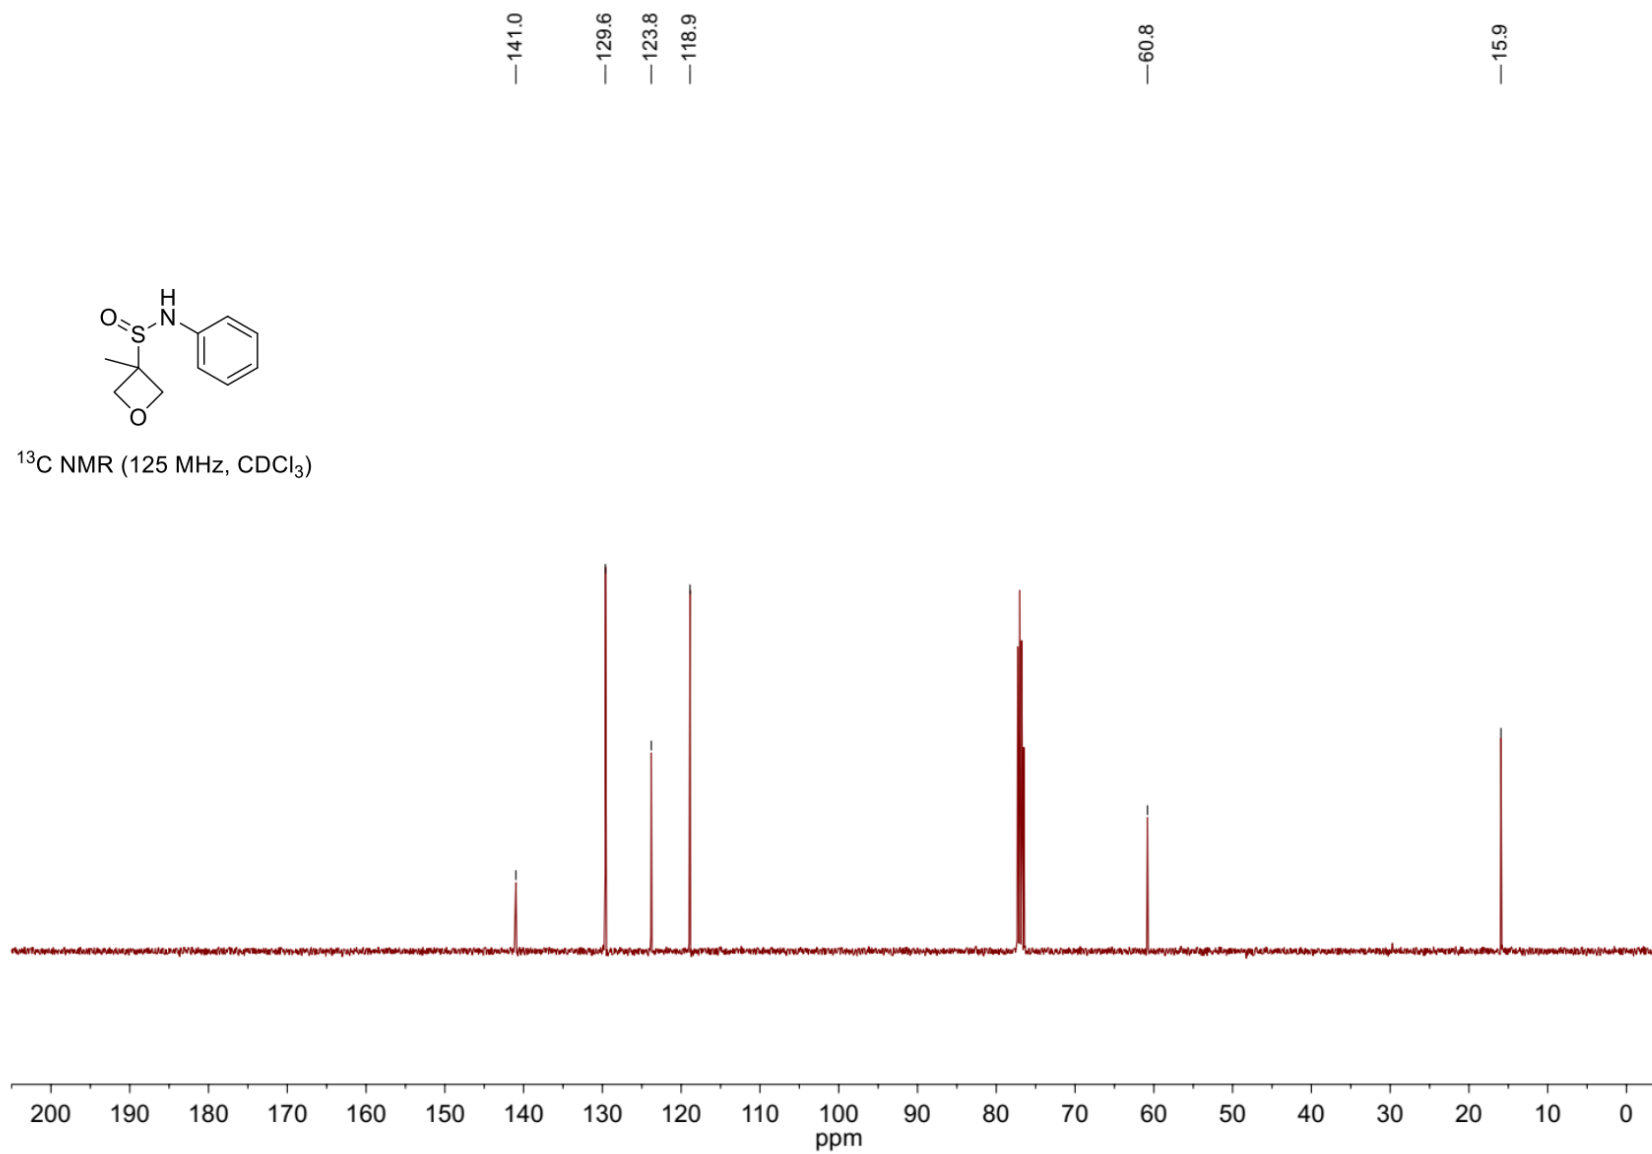

# 1-Methyl-4-oxo-N-phenylcyclohexane-1-sulfonamide (1r)

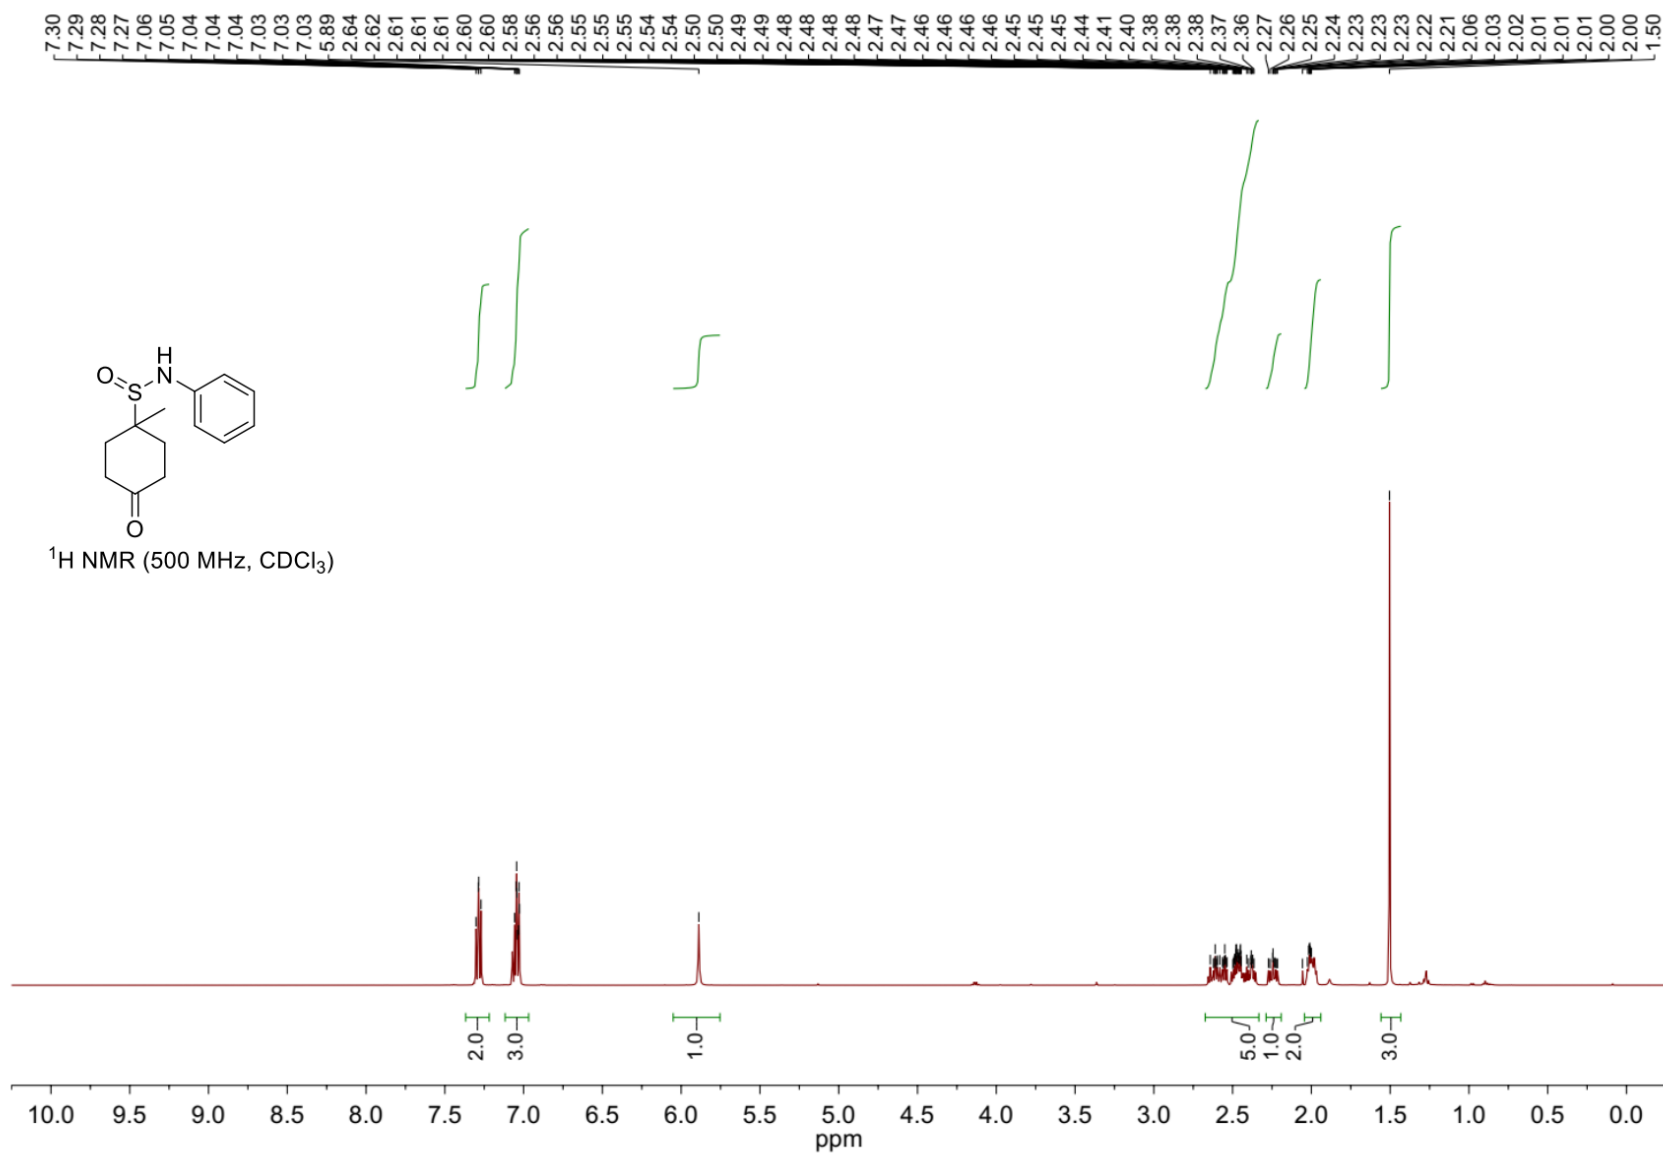



# 1-Methyl-4-oxo-N-phenylcyclohexane-1-sulfonamide (1r)

—209.2

—141.6

—129.6  
—123.4  
—118.5

—58.5

—36.9  
—36.6  
—31.8  
—30.6

—16.1

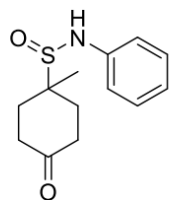

<sup>13</sup>C NMR (125 MHz, CDCl<sub>3</sub>)

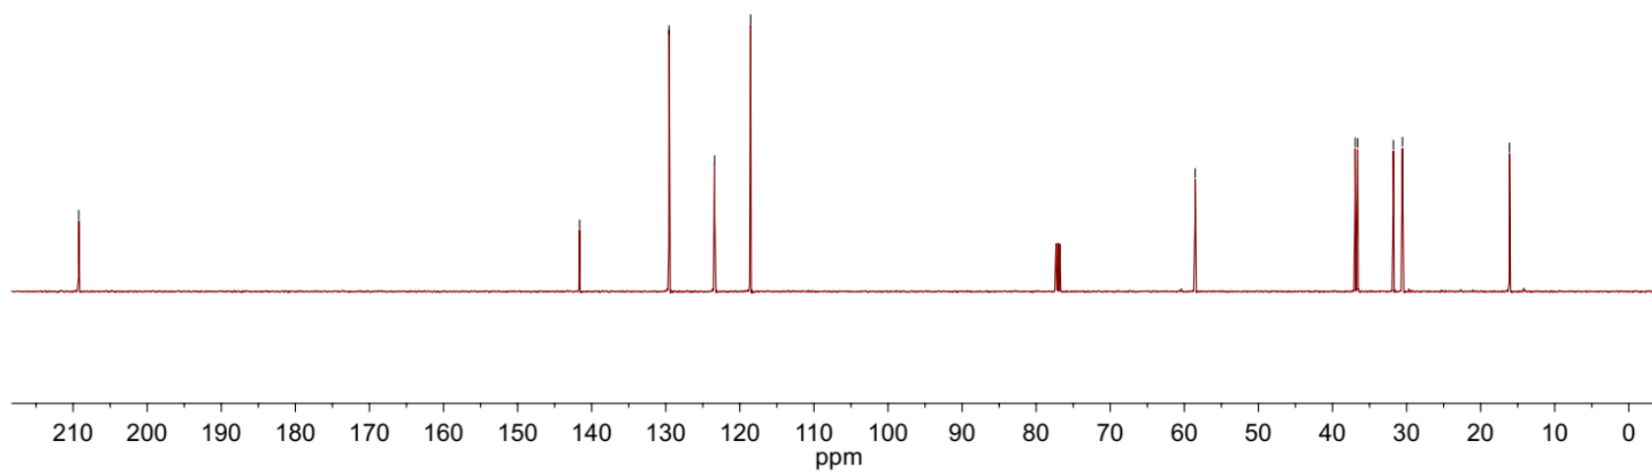

(1*s*,3*R*,5*S*,7*s*)-4-Oxo-*N*-phenyladamantane-1-sulfinamide (1*s*)

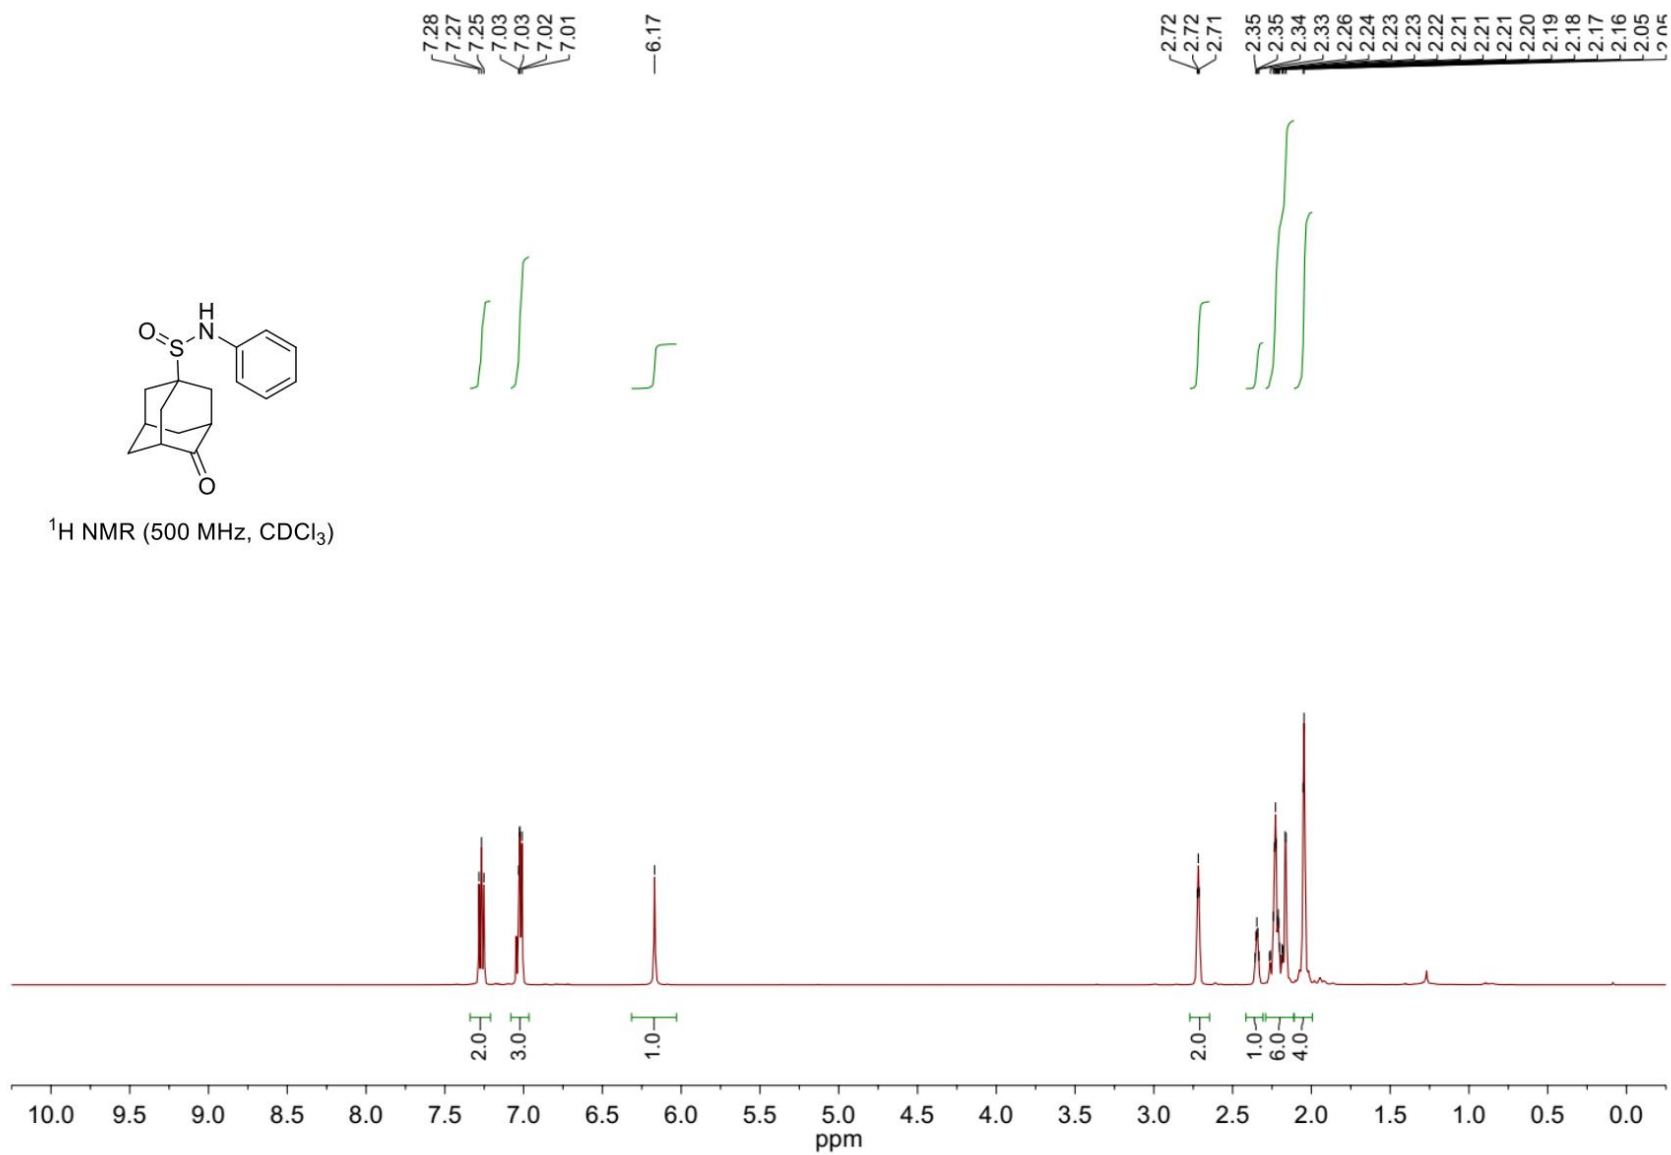

(1*s*,3*R*,5*S*,7*s*)-4-Oxo-*N*-phenyladamantane-1-sulfinamide (1*s*)

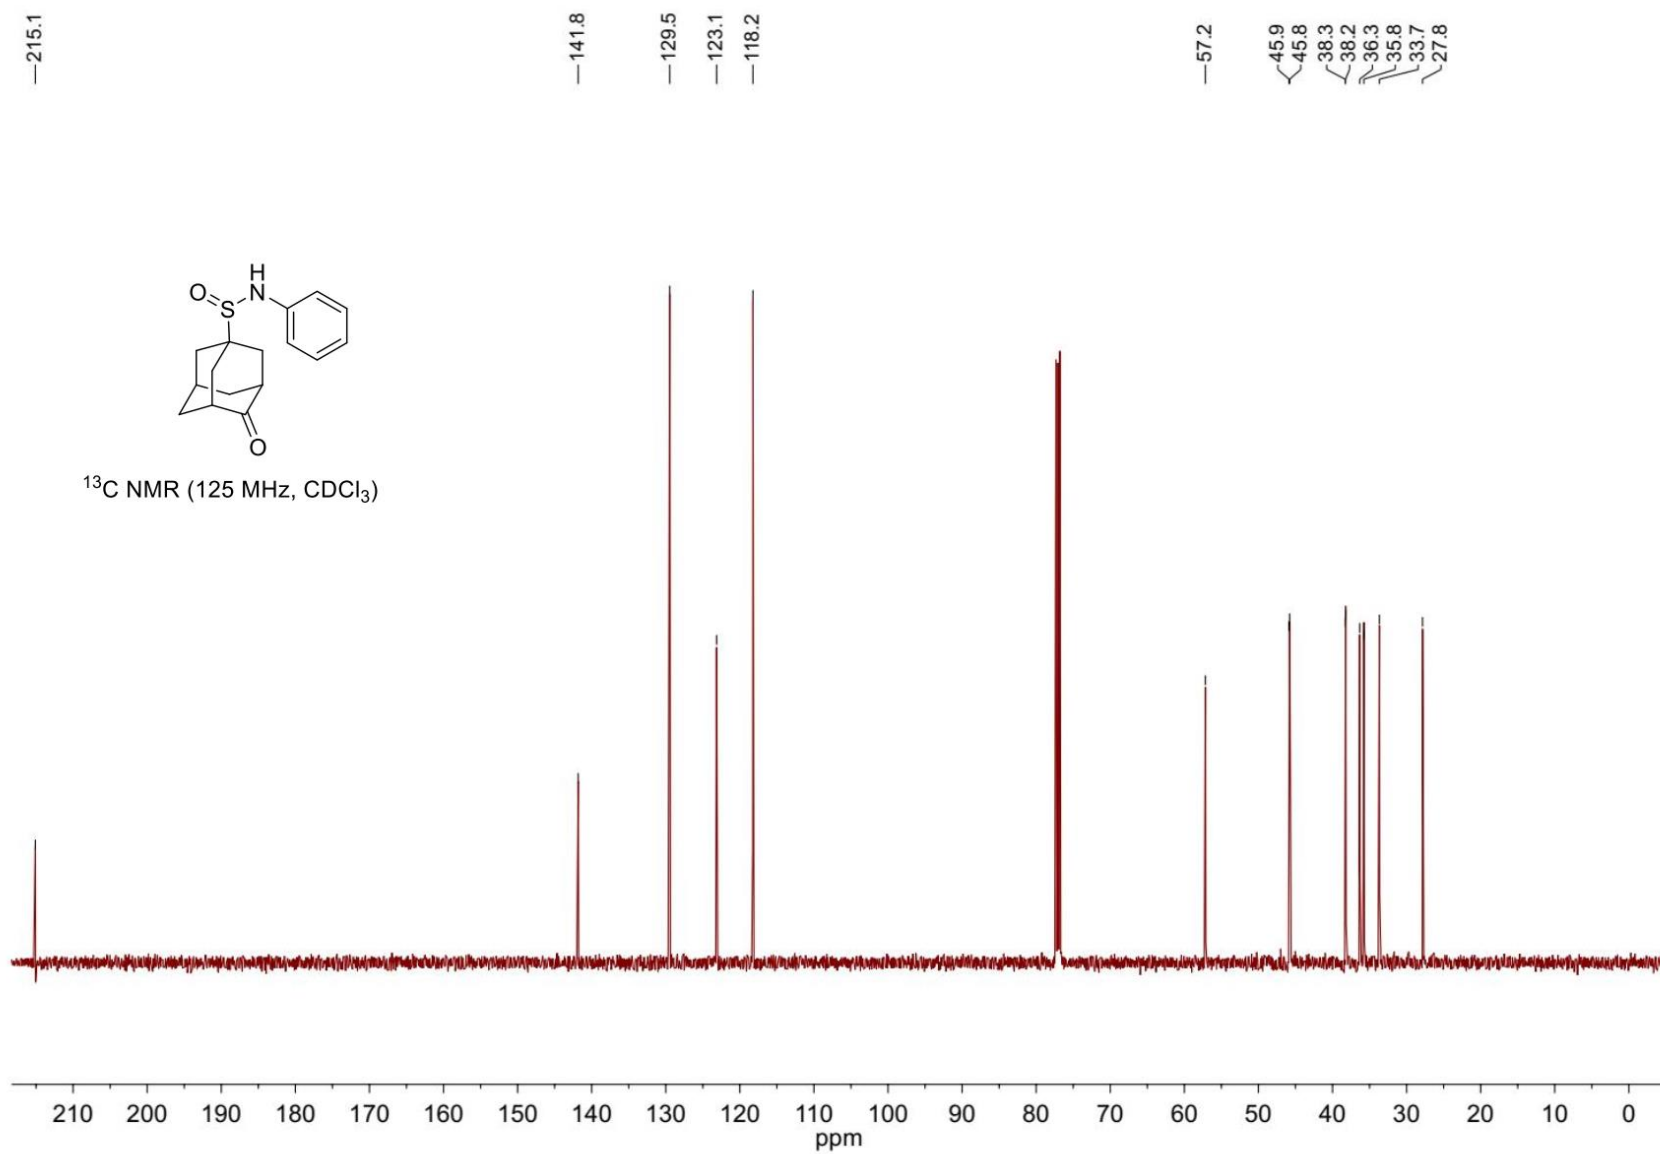

Methyl 4-((phenylamino)sulfinyl)bicyclo[2.2.2]octane-1-carboxylate (1t)

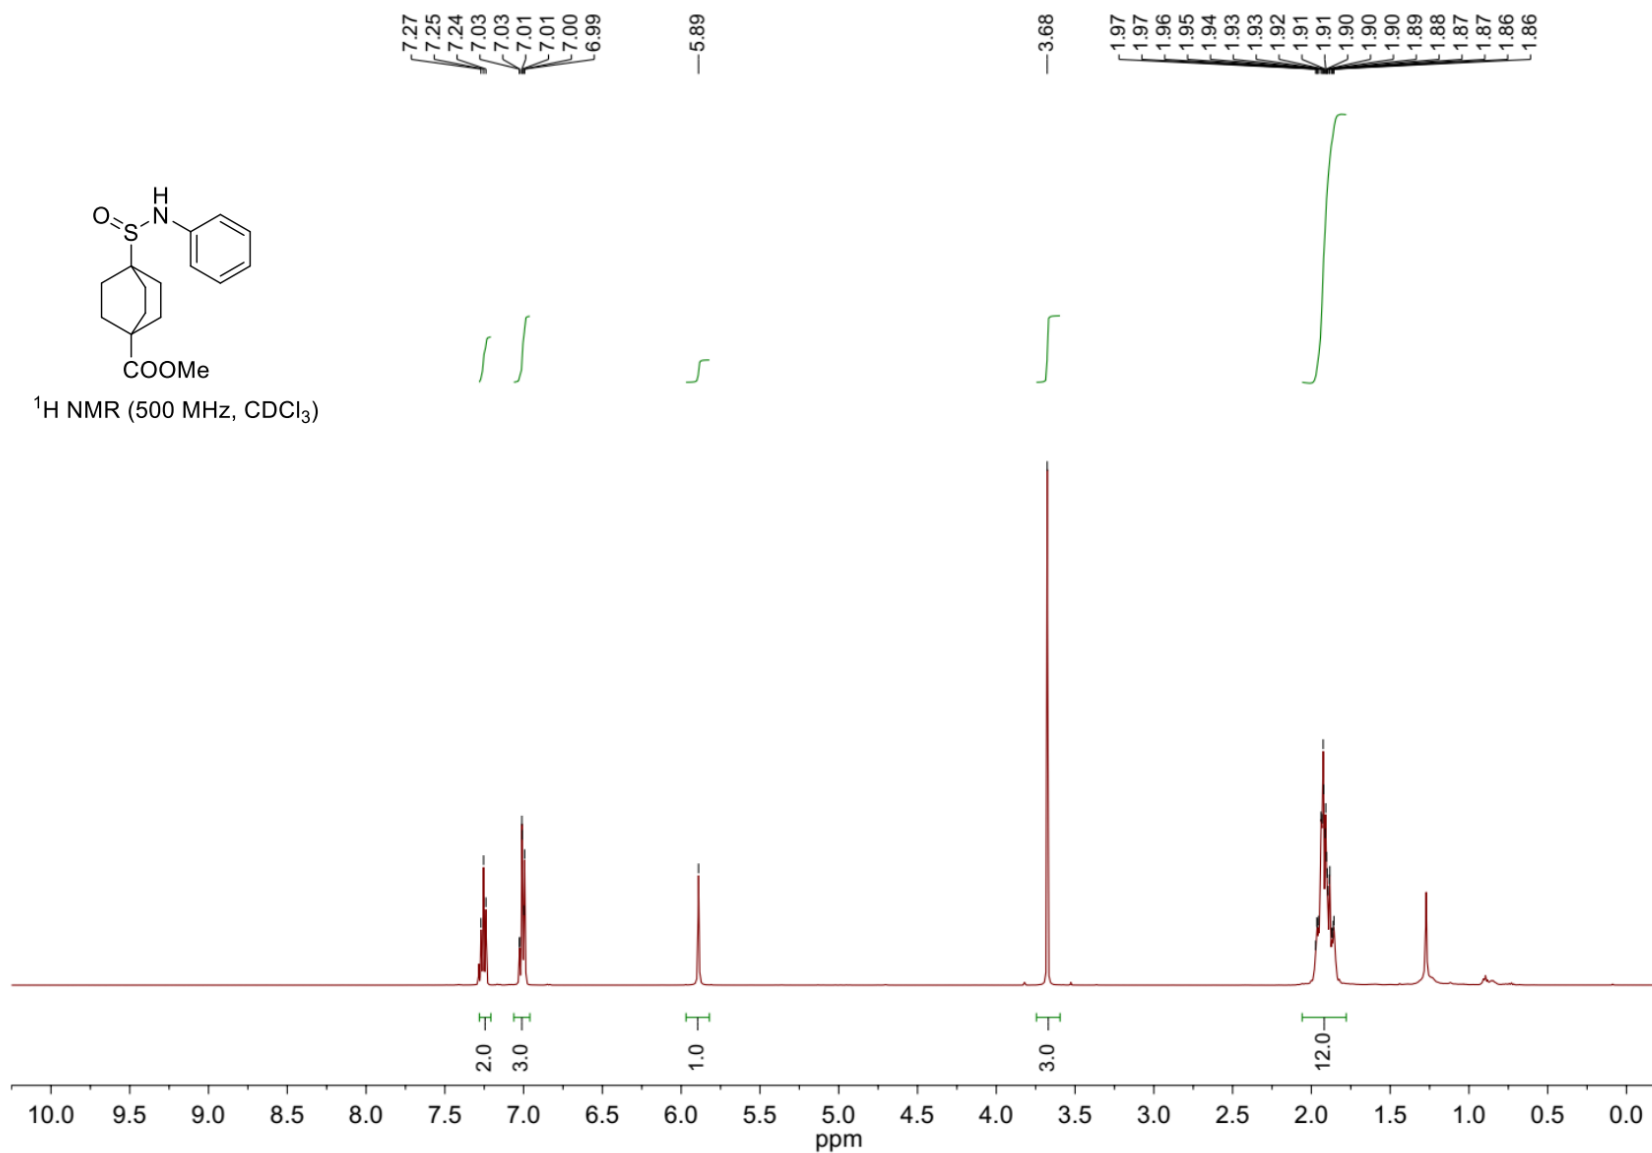

# Methyl 4-((phenylamino)sulfinyl)bicyclo[2.2.2]octane-1-carboxylate (1t)

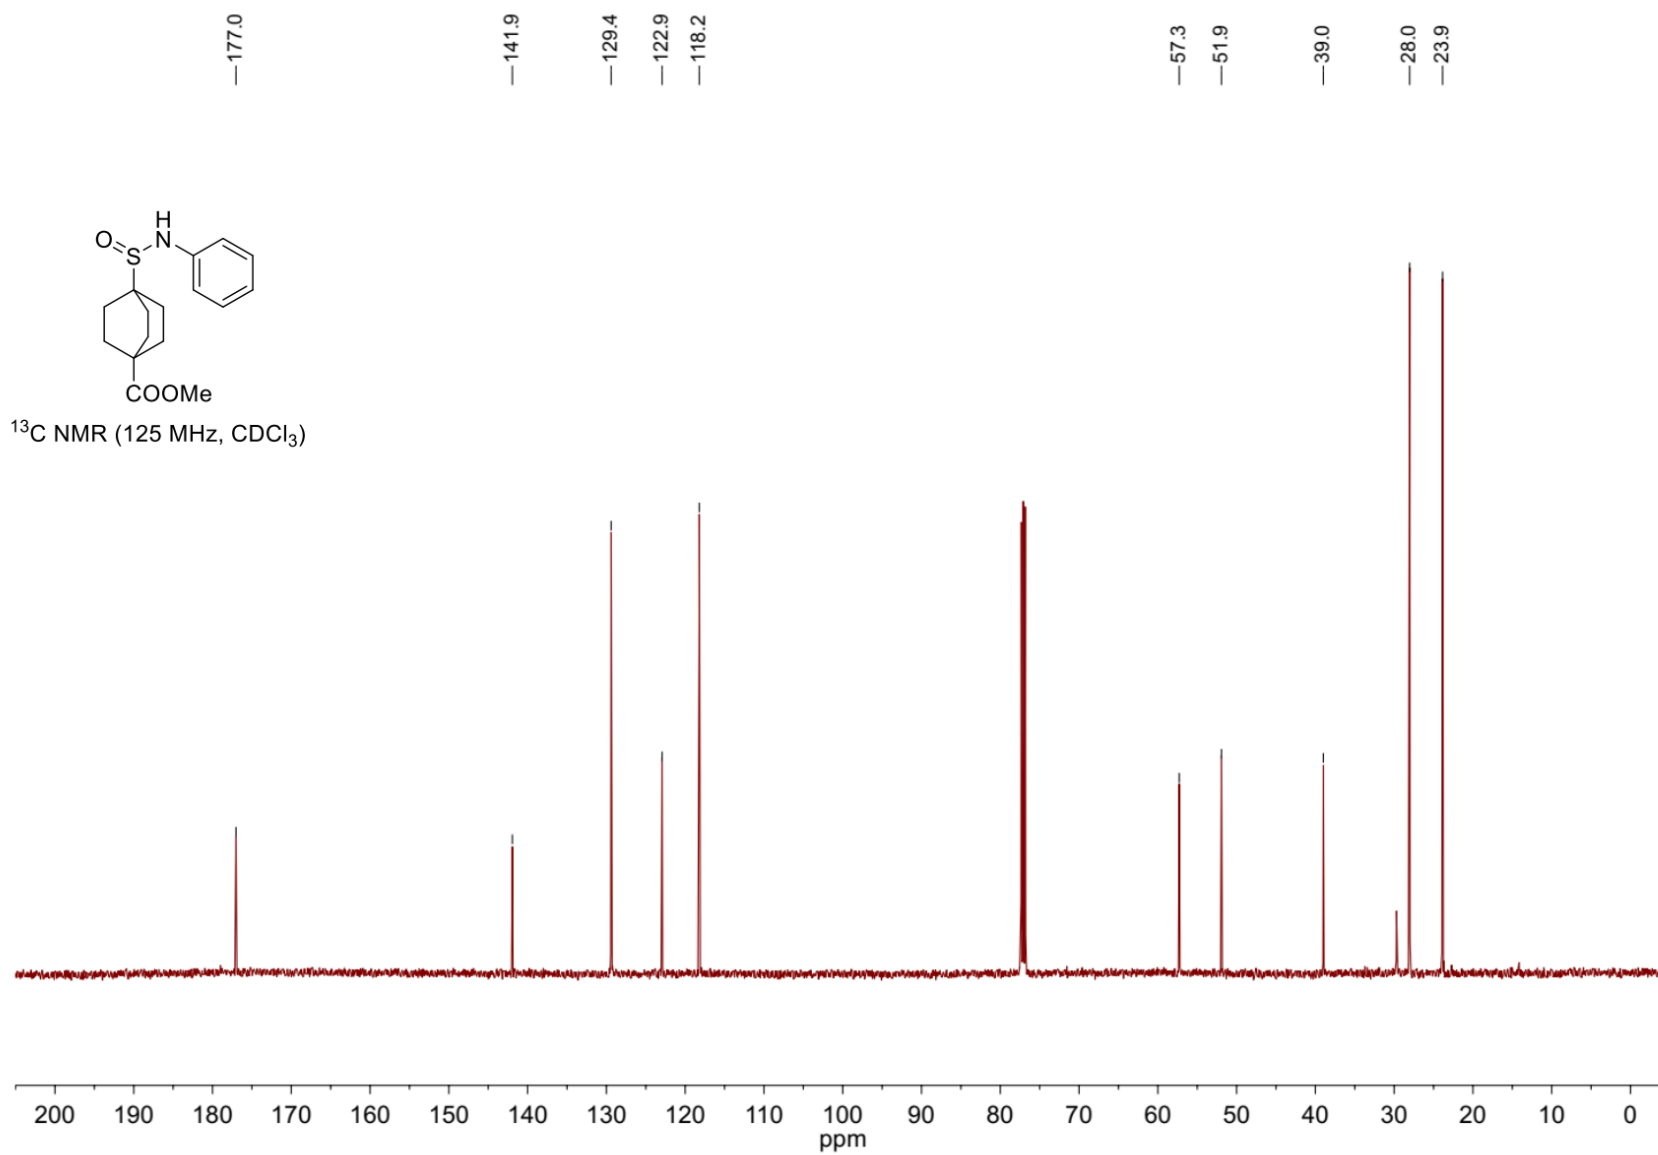

*tert*-Butyl 4-methyl-4-((phenylamino)sulfinyl)piperidine-1-carboxylate (**1u**)

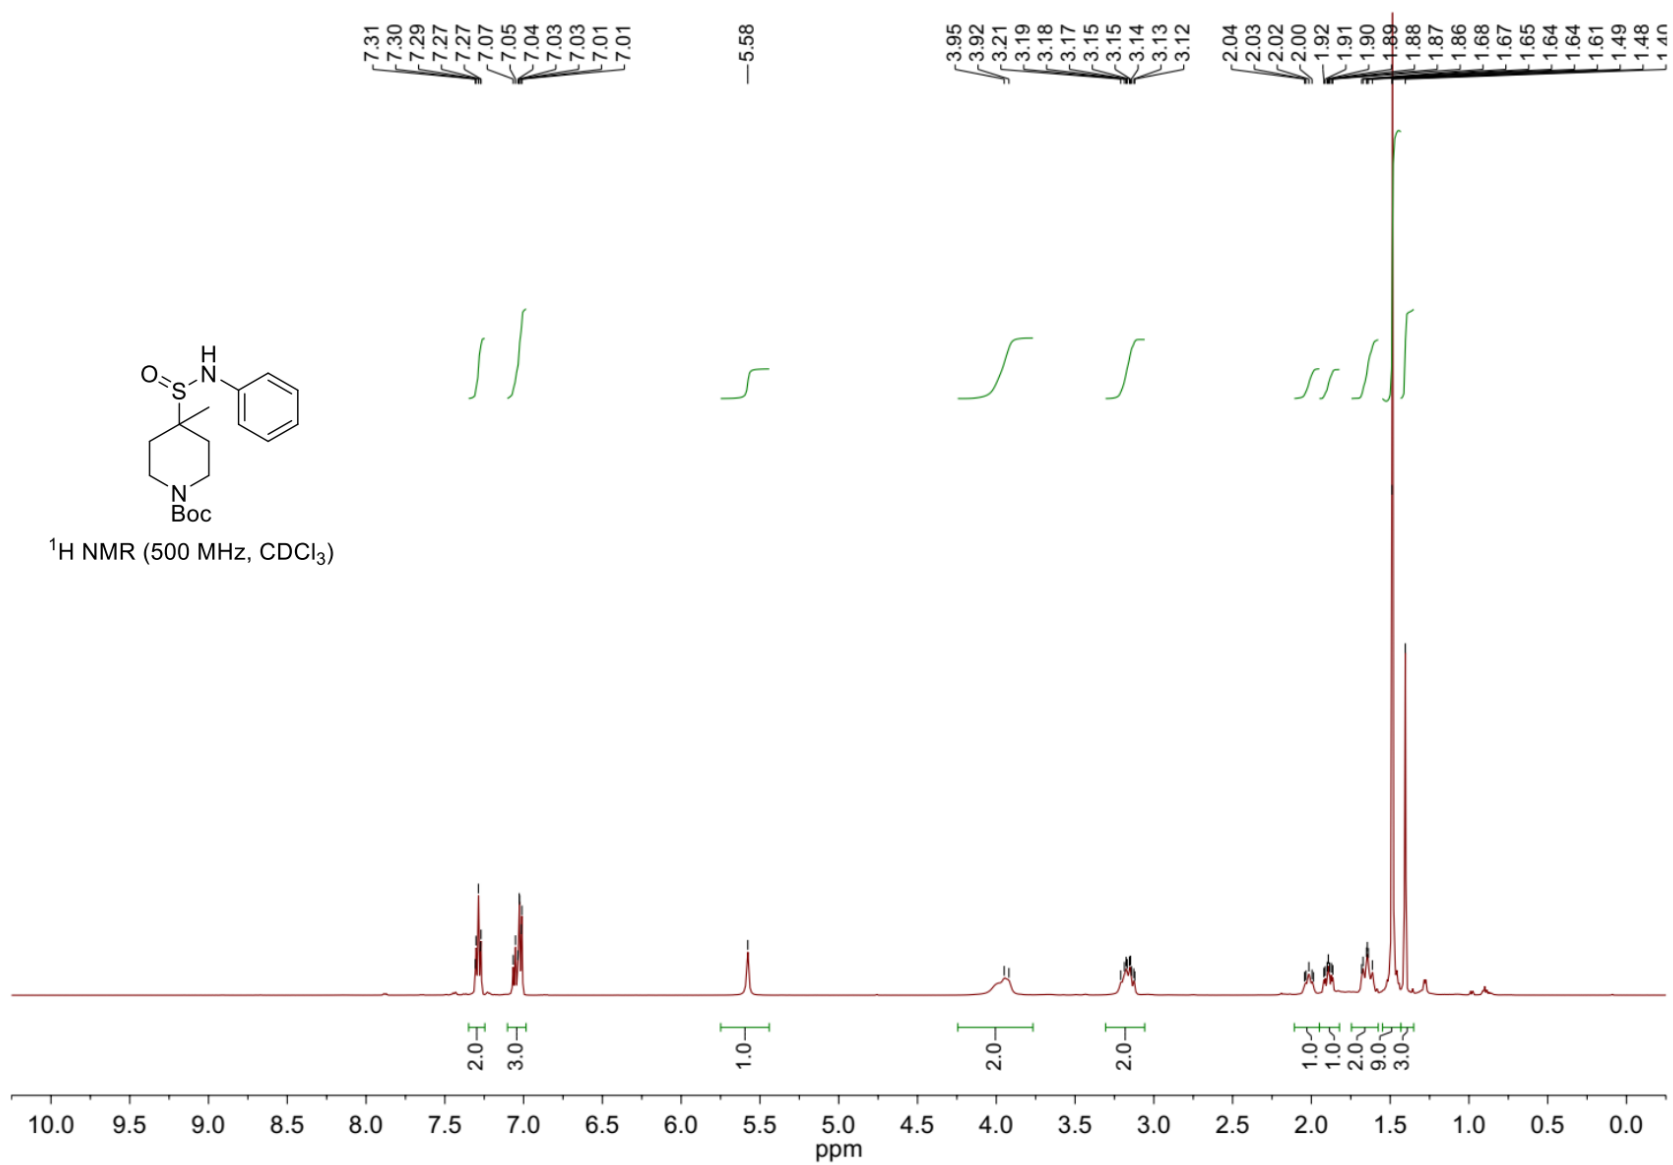

*tert*-Butyl 4-methyl-4-((phenylamino)sulfinyl)piperidine-1-carboxylate (1u)

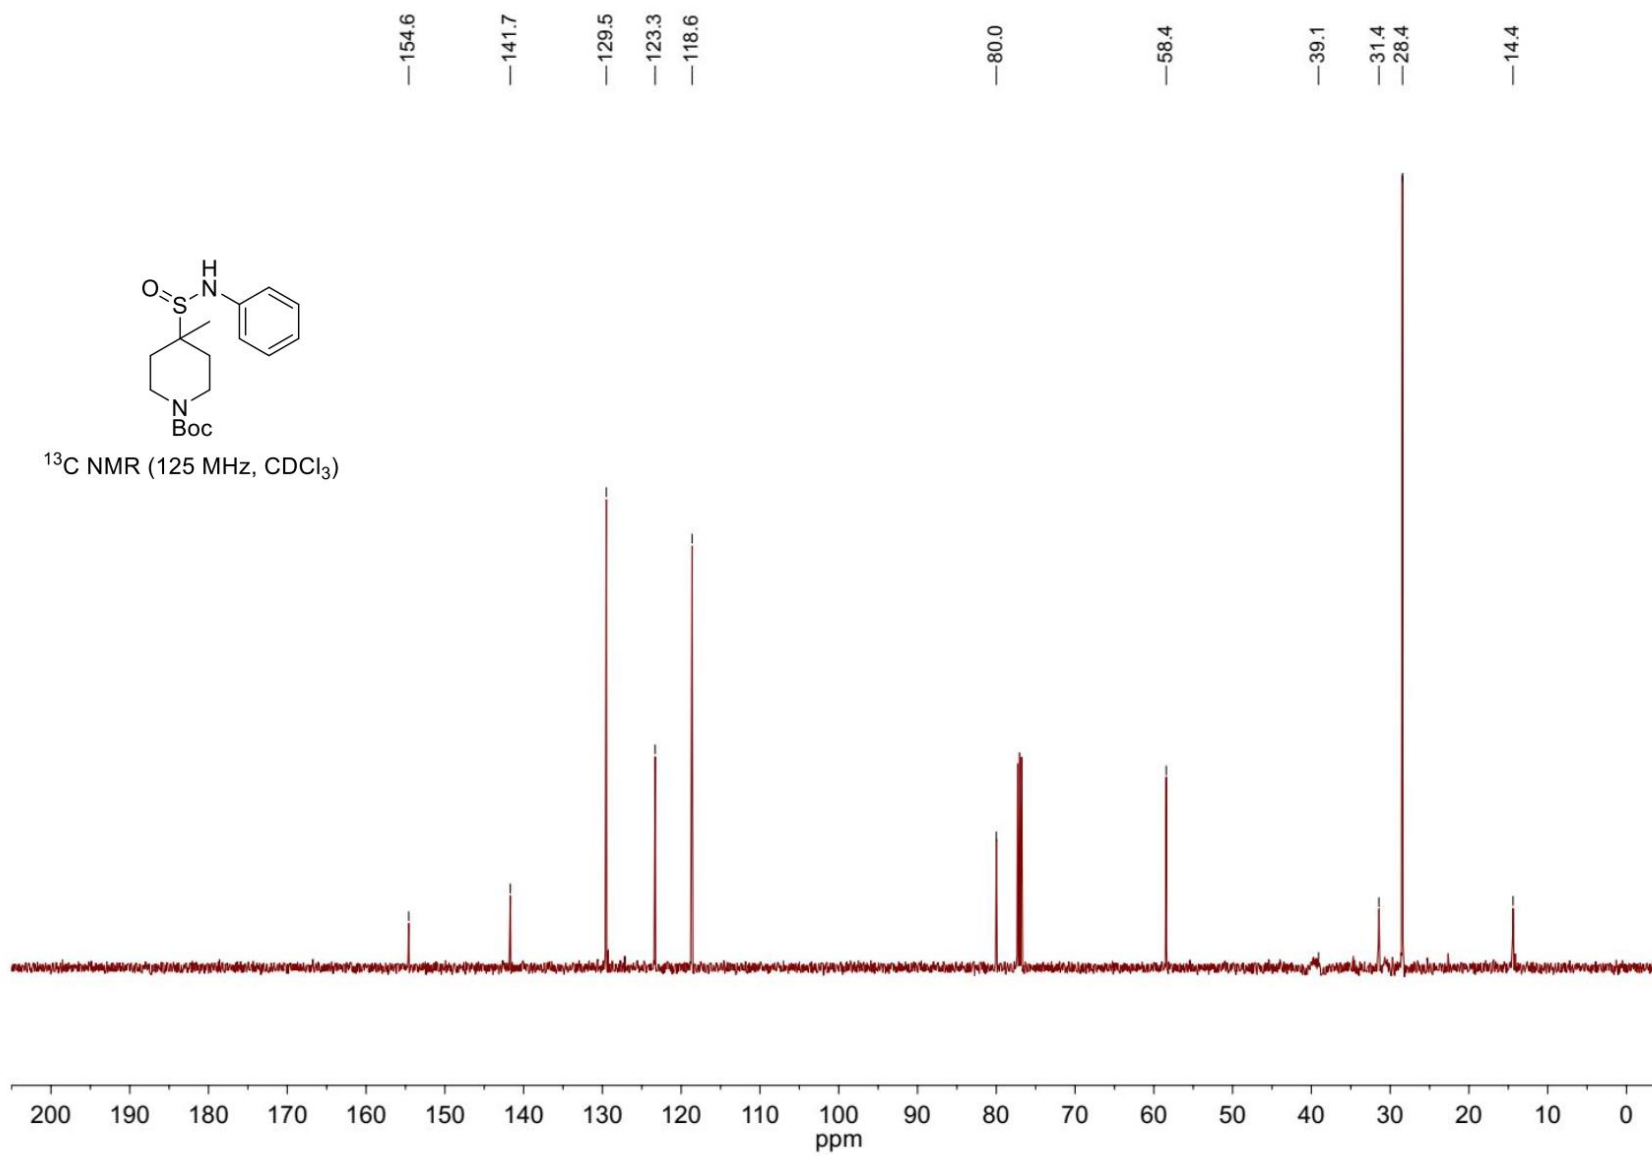

***N*-(4-Cyanophenyl)-4,4-difluorocyclohexane-1-sulfonamide (4a)**

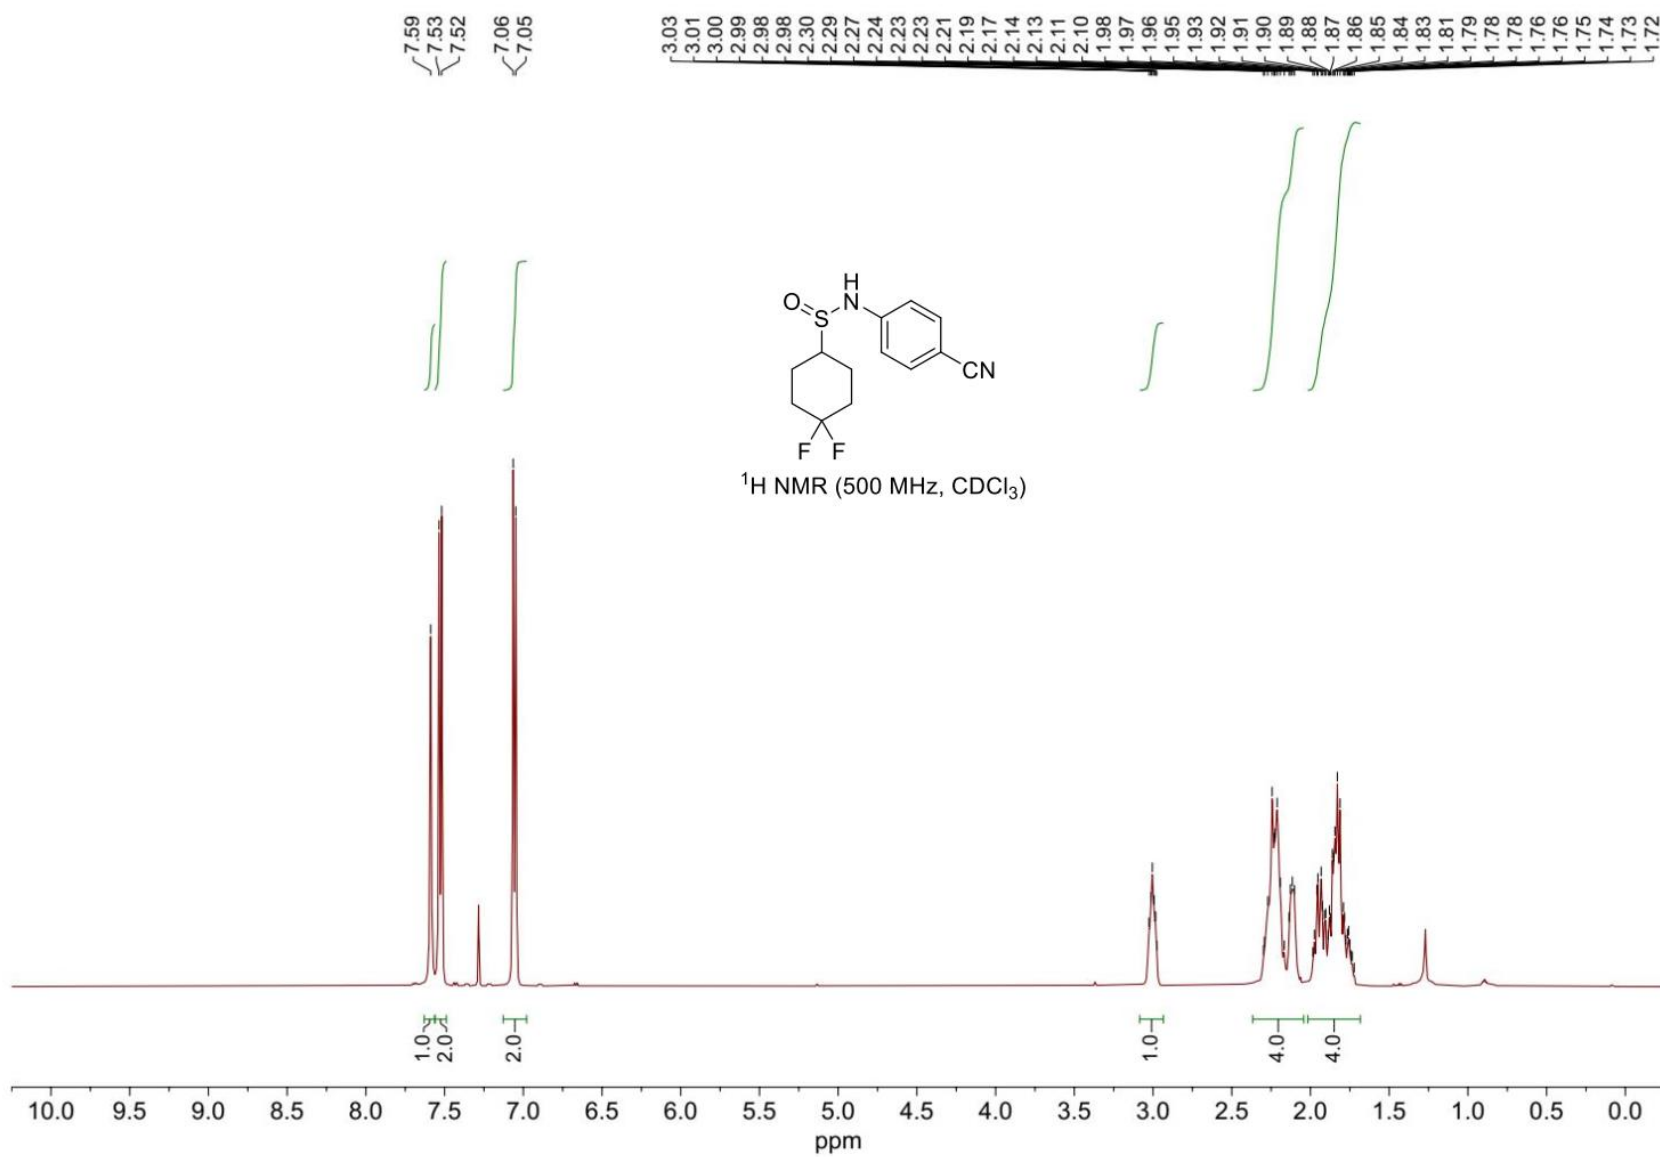



***N*-(4-Cyanophenyl)-4,4-difluorocyclohexane-1-sulfonamide (4a)**

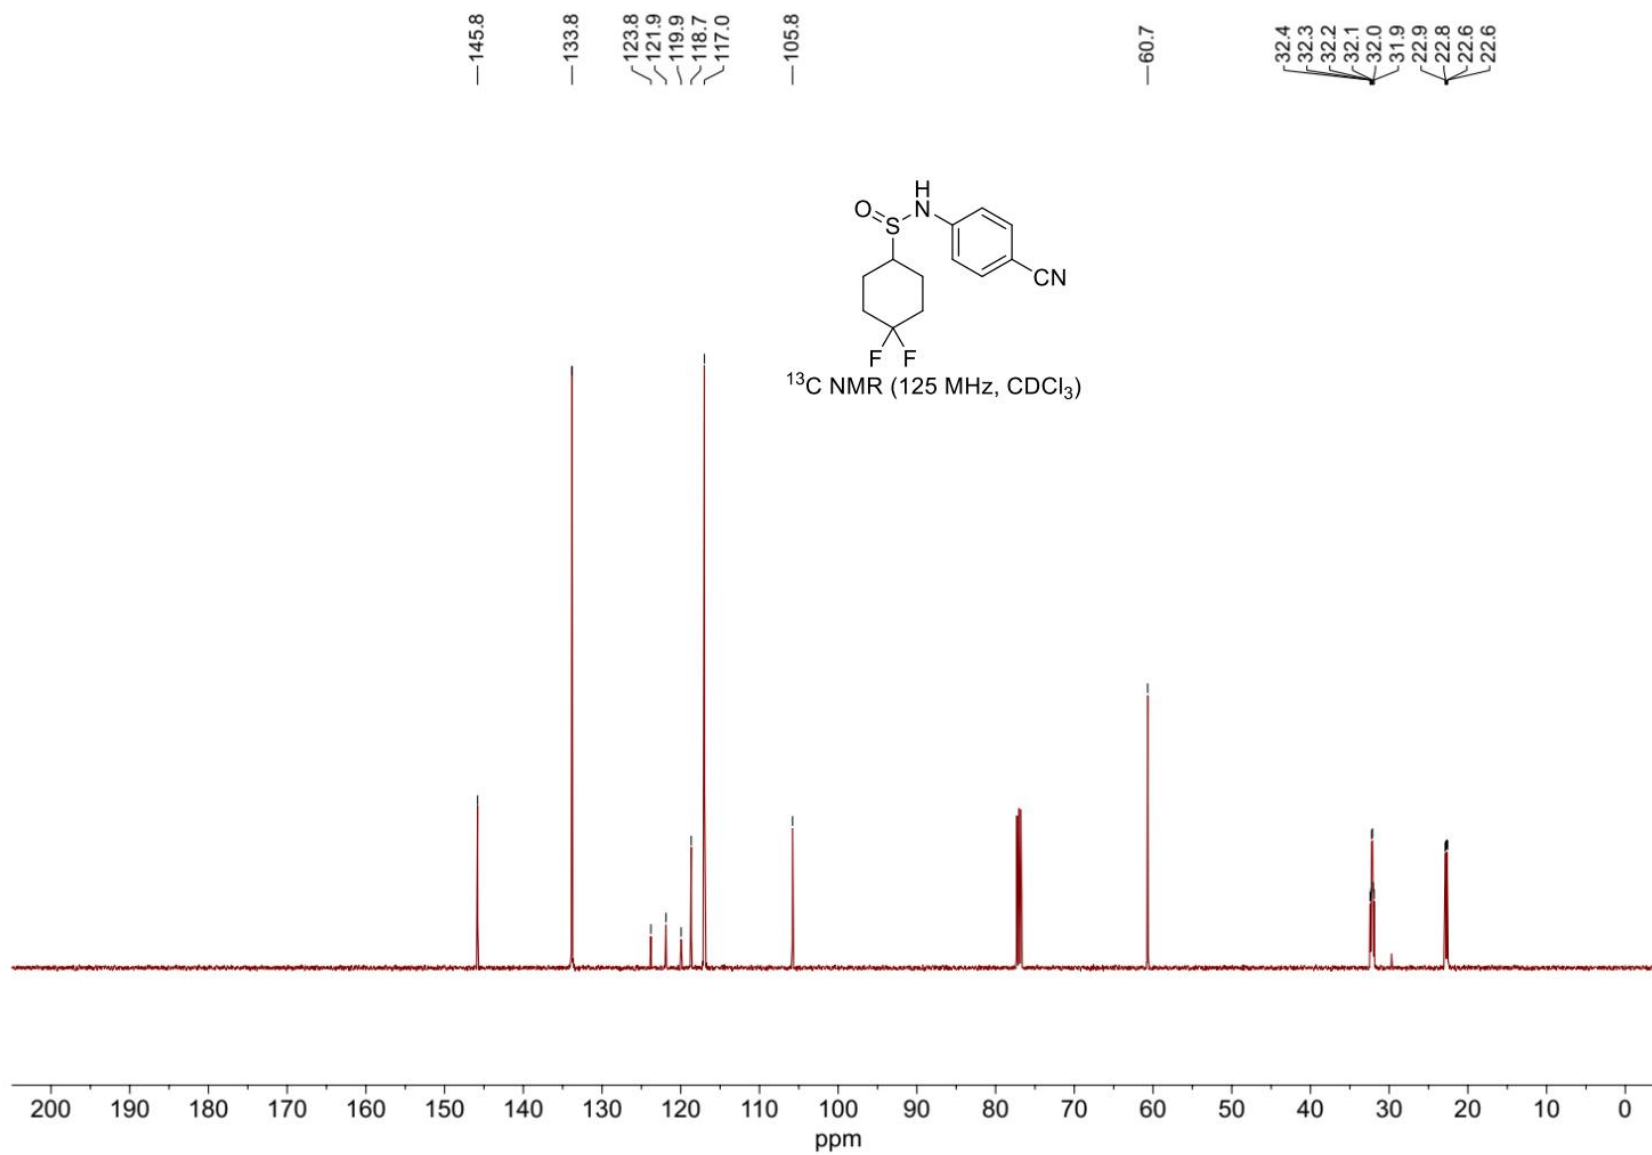

4-Methyl-N-(3-(trifluoromethoxy)phenyl)tetrahydro-2H-pyran-4-sulfonamide (4b)

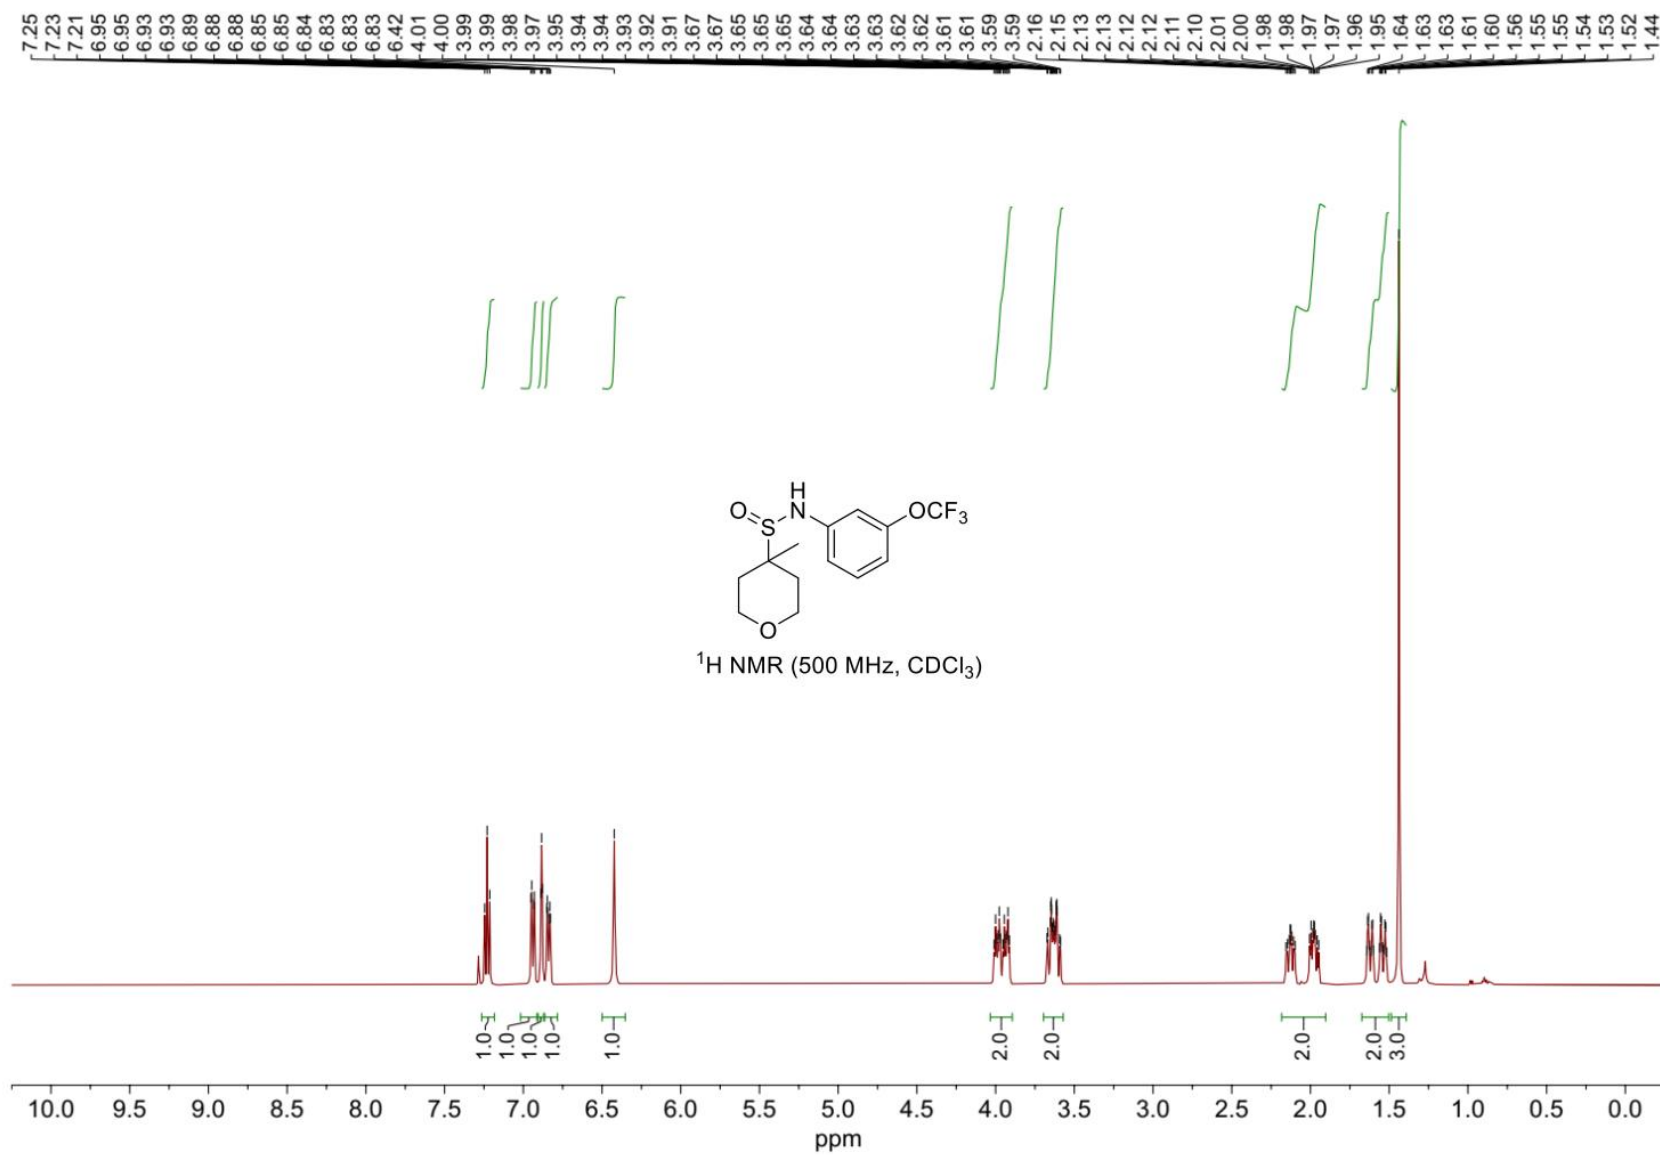

4-Methyl-N-(3-(trifluoromethoxy)phenyl)tetrahydro-2H-pyran-4-sulfonamide (4b)

—150.0 —143.8 —130.5 —123.4 —121.4 —119.3 —117.3 —115.7 —114.6 —110.4 —63.4 —63.4 —57.8 —31.6 —31.0 —14.5

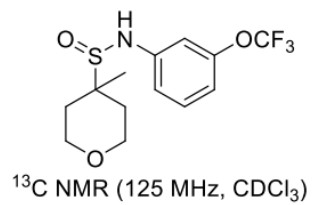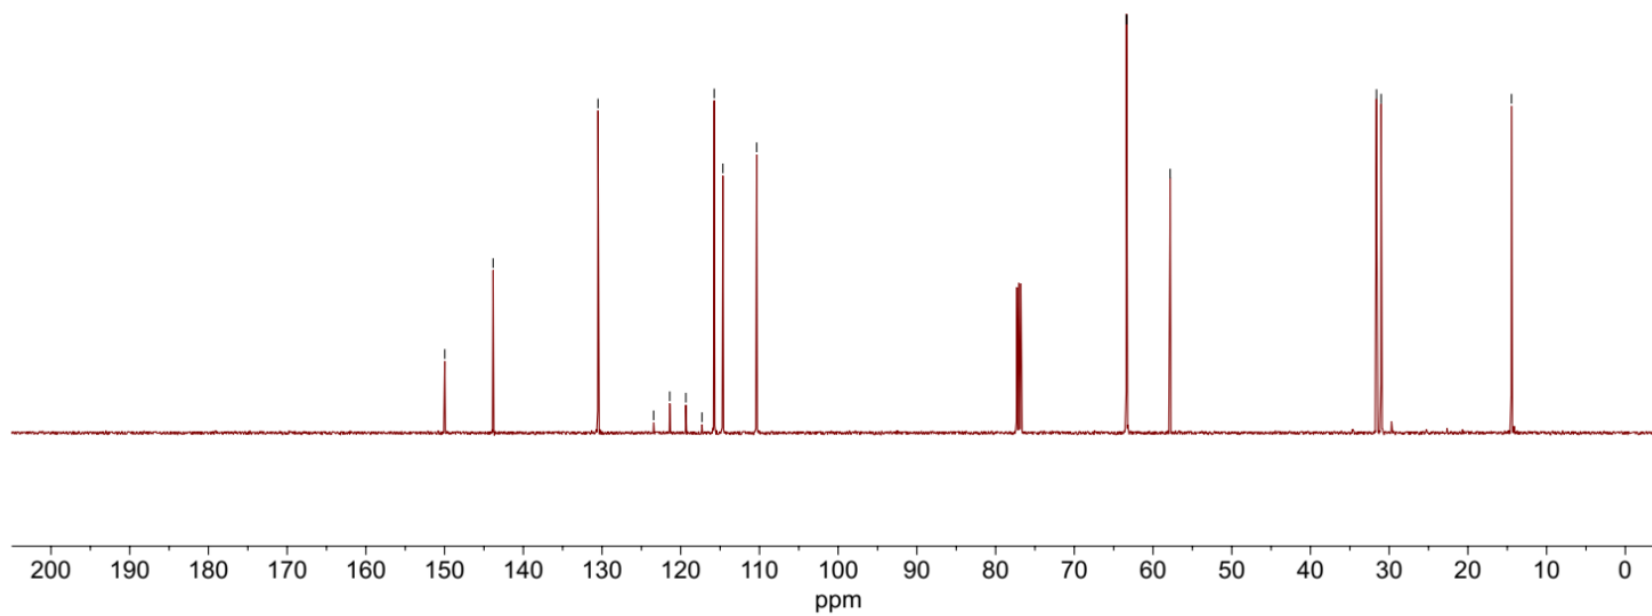

***N*-(2,4,5-Trifluorophenyl)tetrahydro-2*H*-pyran-4-sulfonamide (4c)**

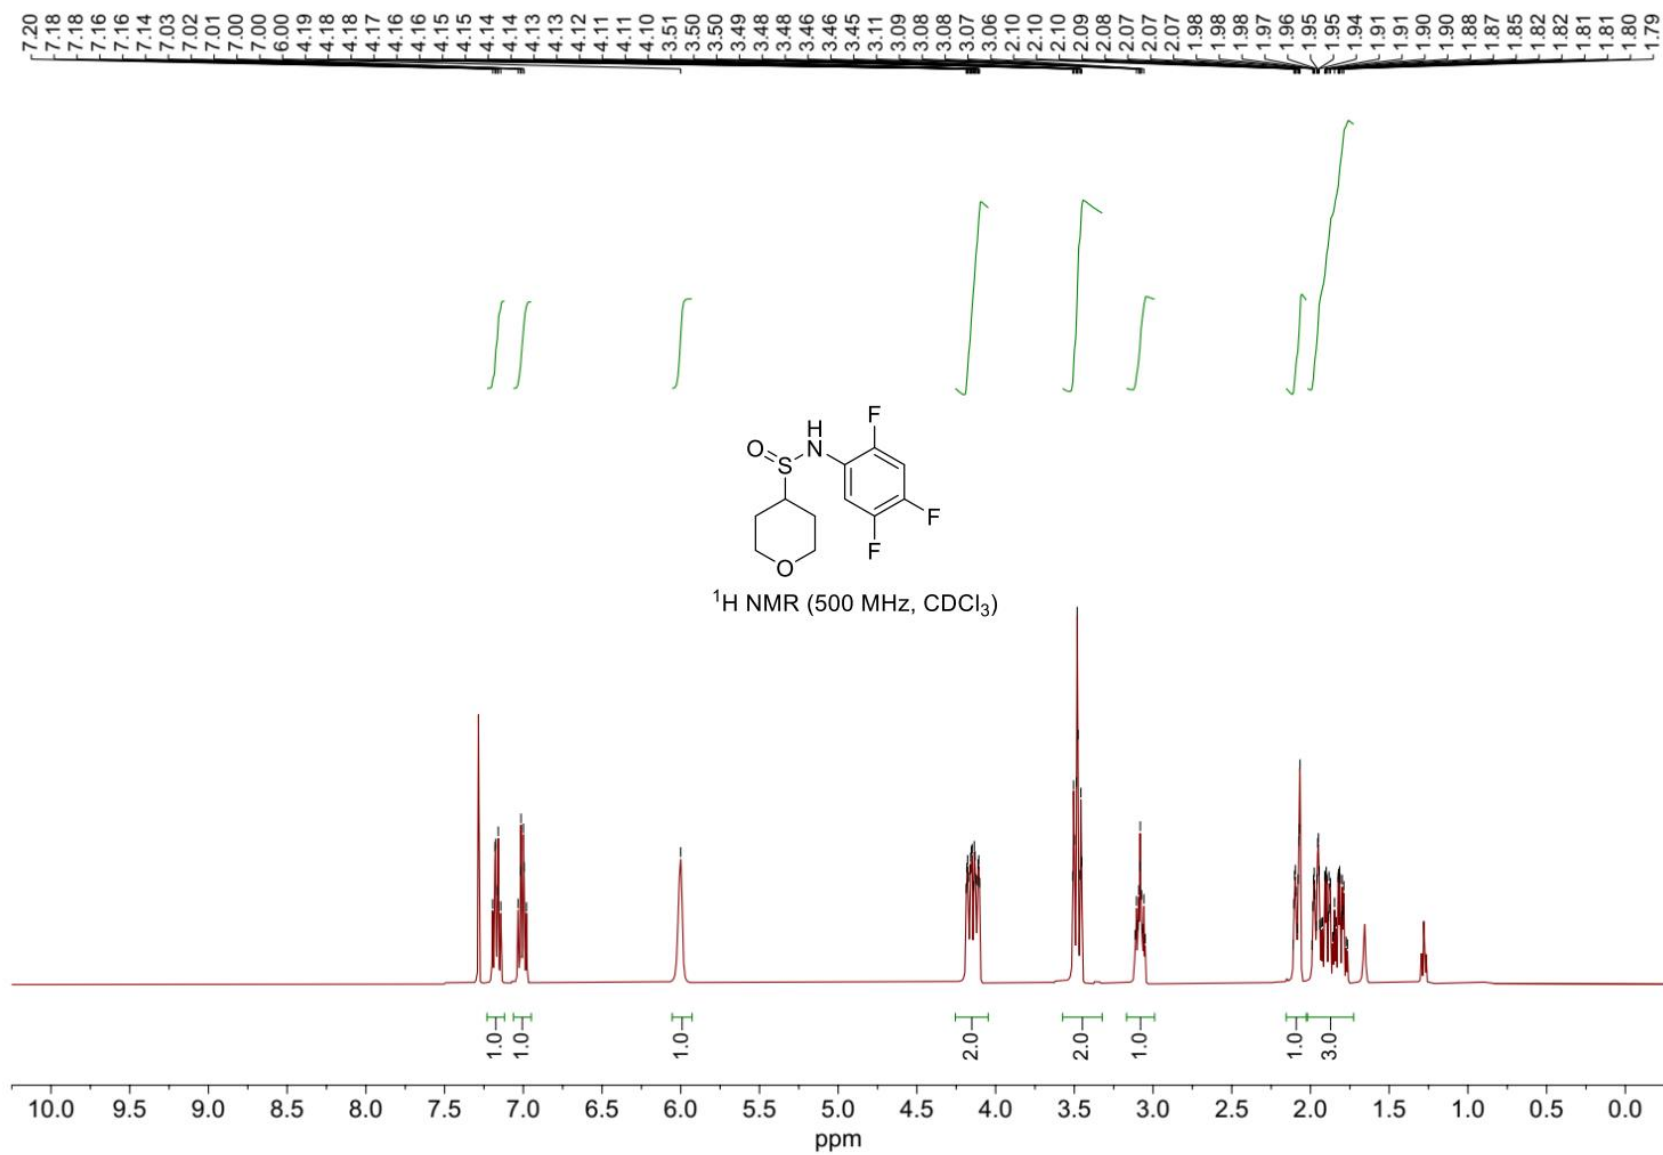

*N*-(2,4,5-Trifluorophenyl)tetrahydro-2*H*-pyran-4-sulfonamide (4c)

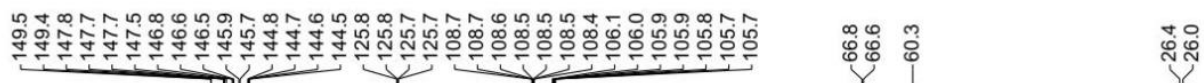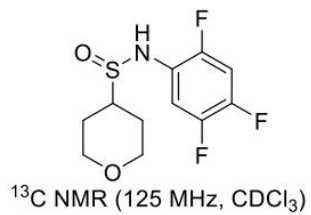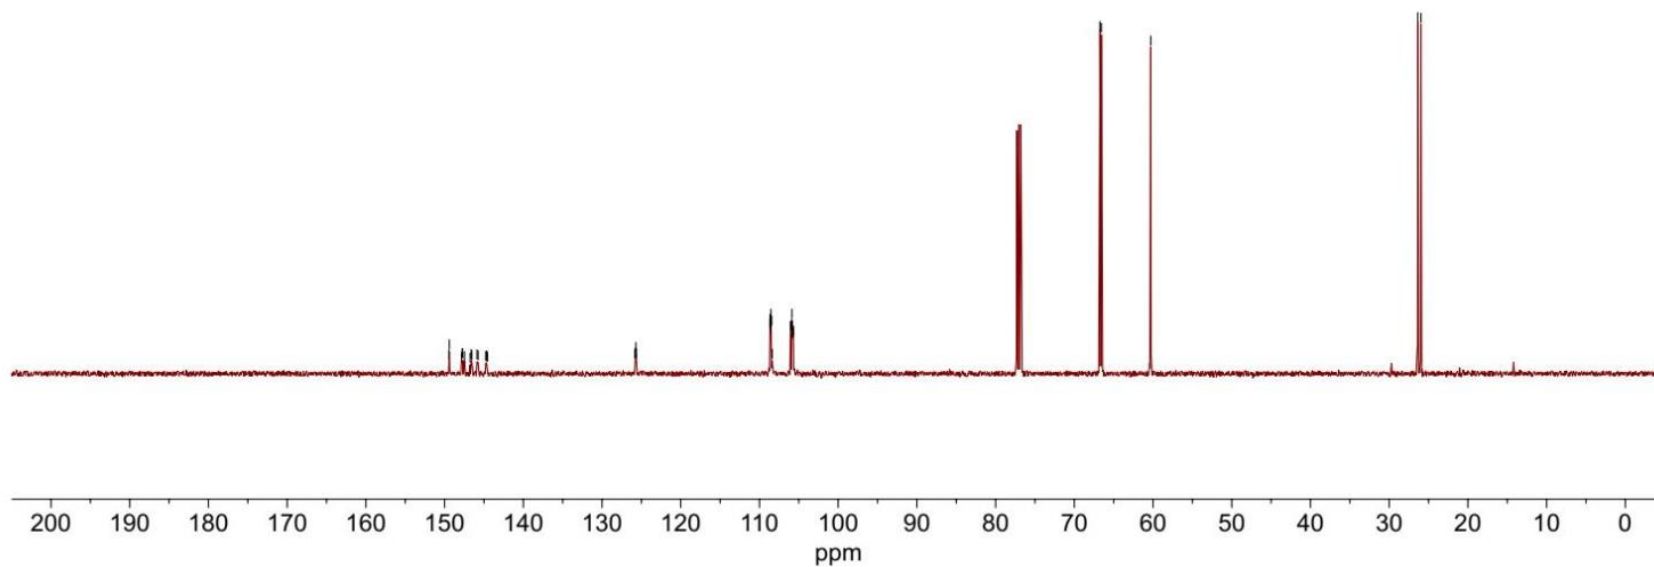

3,3-Dimethoxy-1-methyl-N-(pyridin-3-yl)cyclobutane-1-sulfonamide (4d)

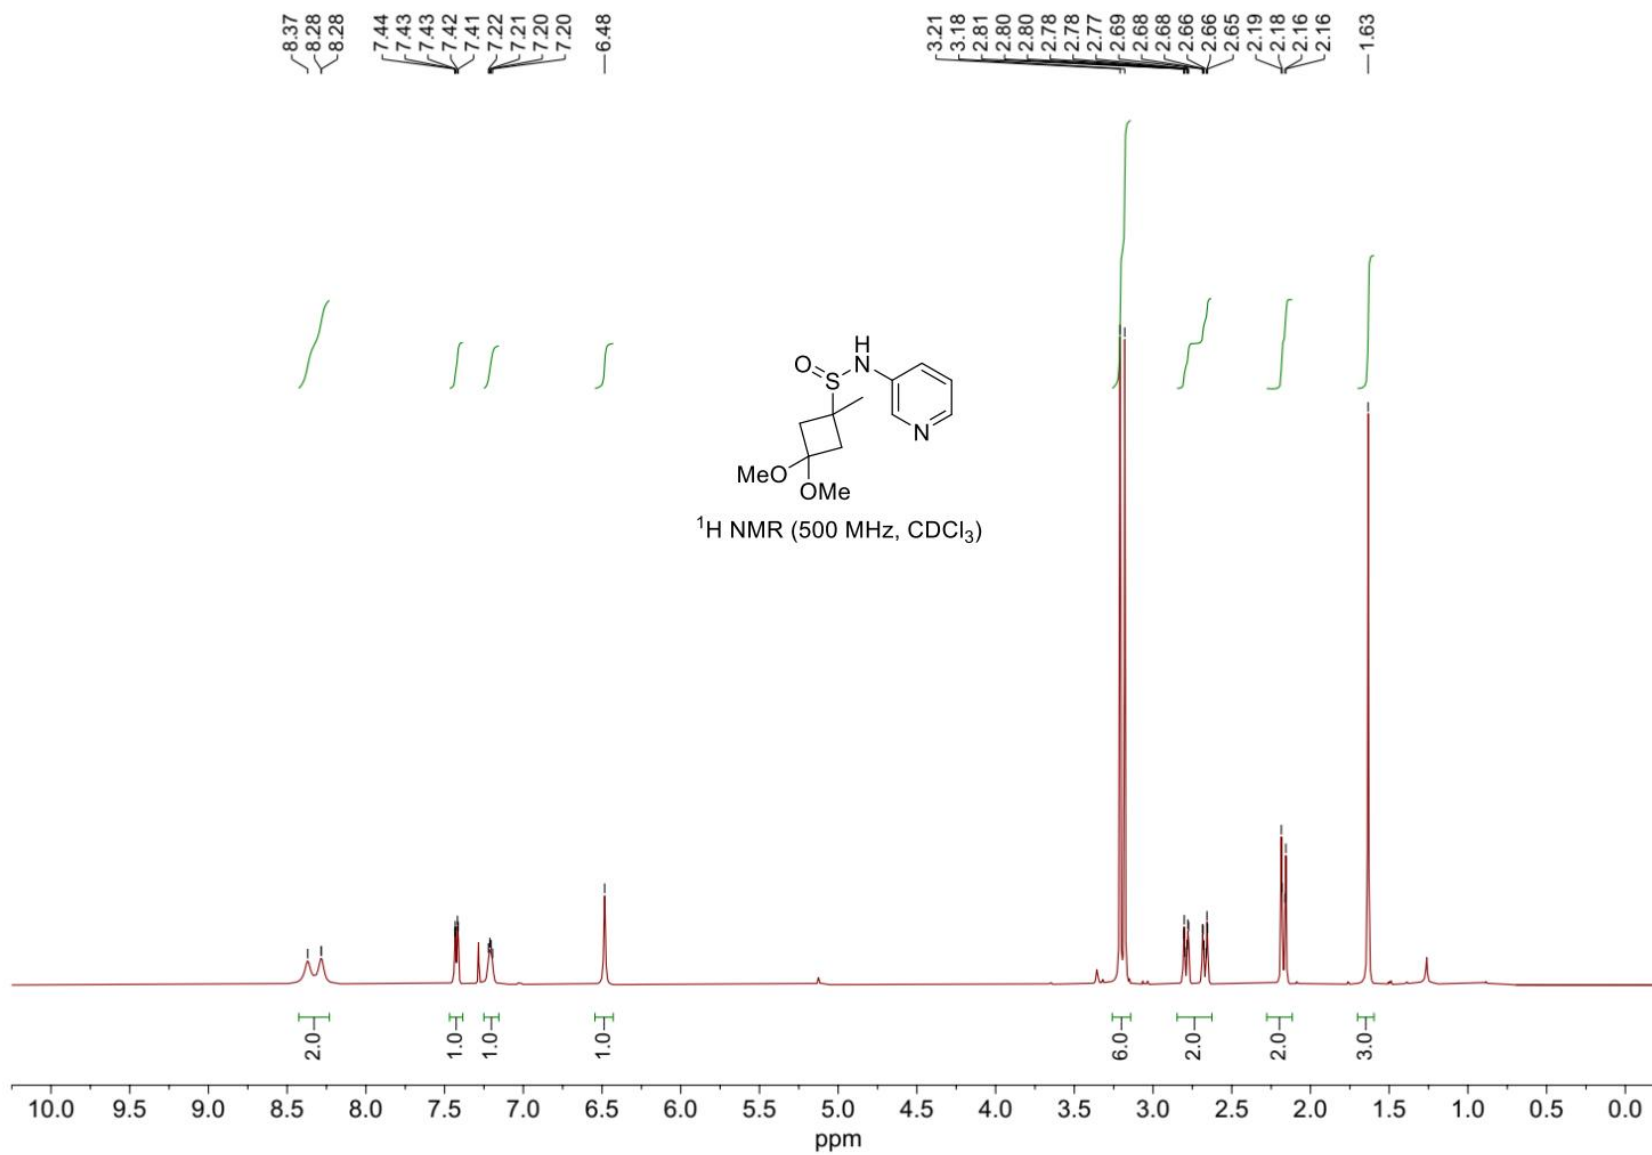

### 3,3-Dimethoxy-1-methyl-N-(pyridin-3-yl)cyclobutane-1-sulfonamide (4d)

144.1  
140.2  
138.7

124.8  
123.9

97.8

52.5  
48.7  
48.6

39.1  
38.1

19.7

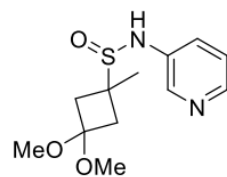

$^{13}\text{C}$  NMR (125 MHz,  $\text{CDCl}_3$ )

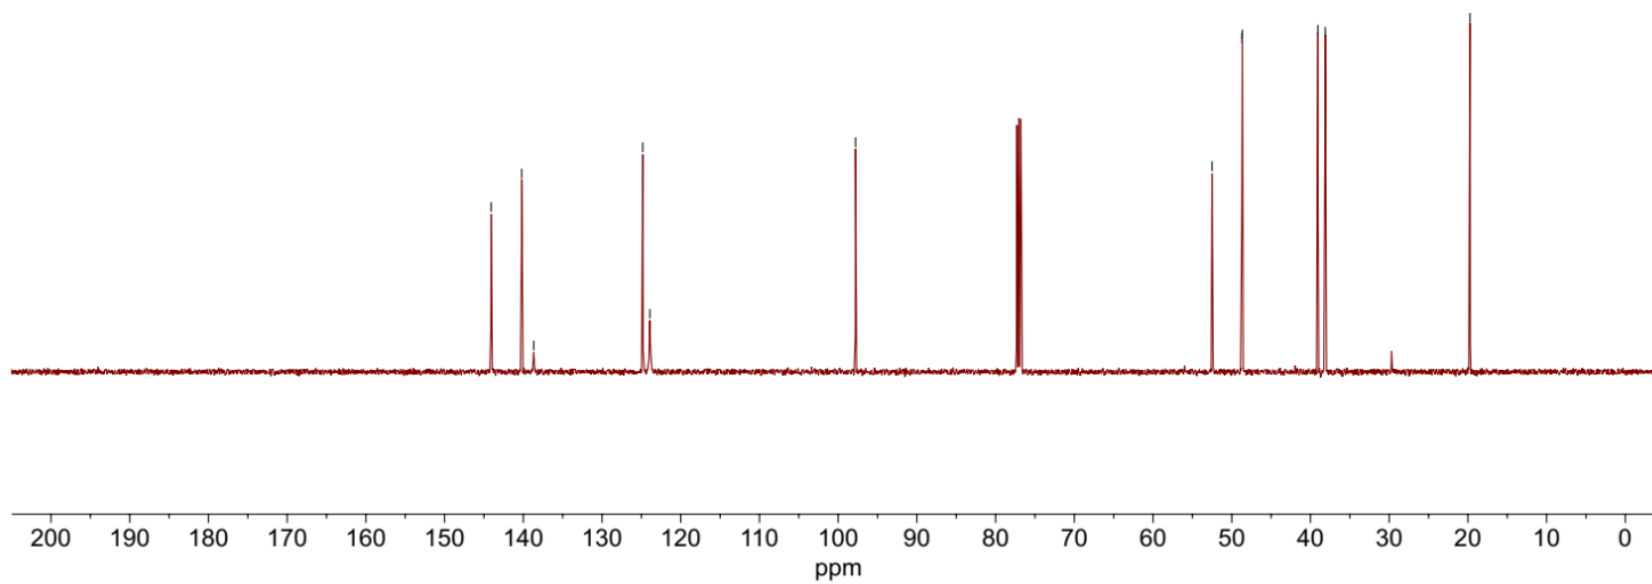

**N-(6-Methylpyridin-2-yl)cyclopent-3-ene-1-sulfonamide (4e)**

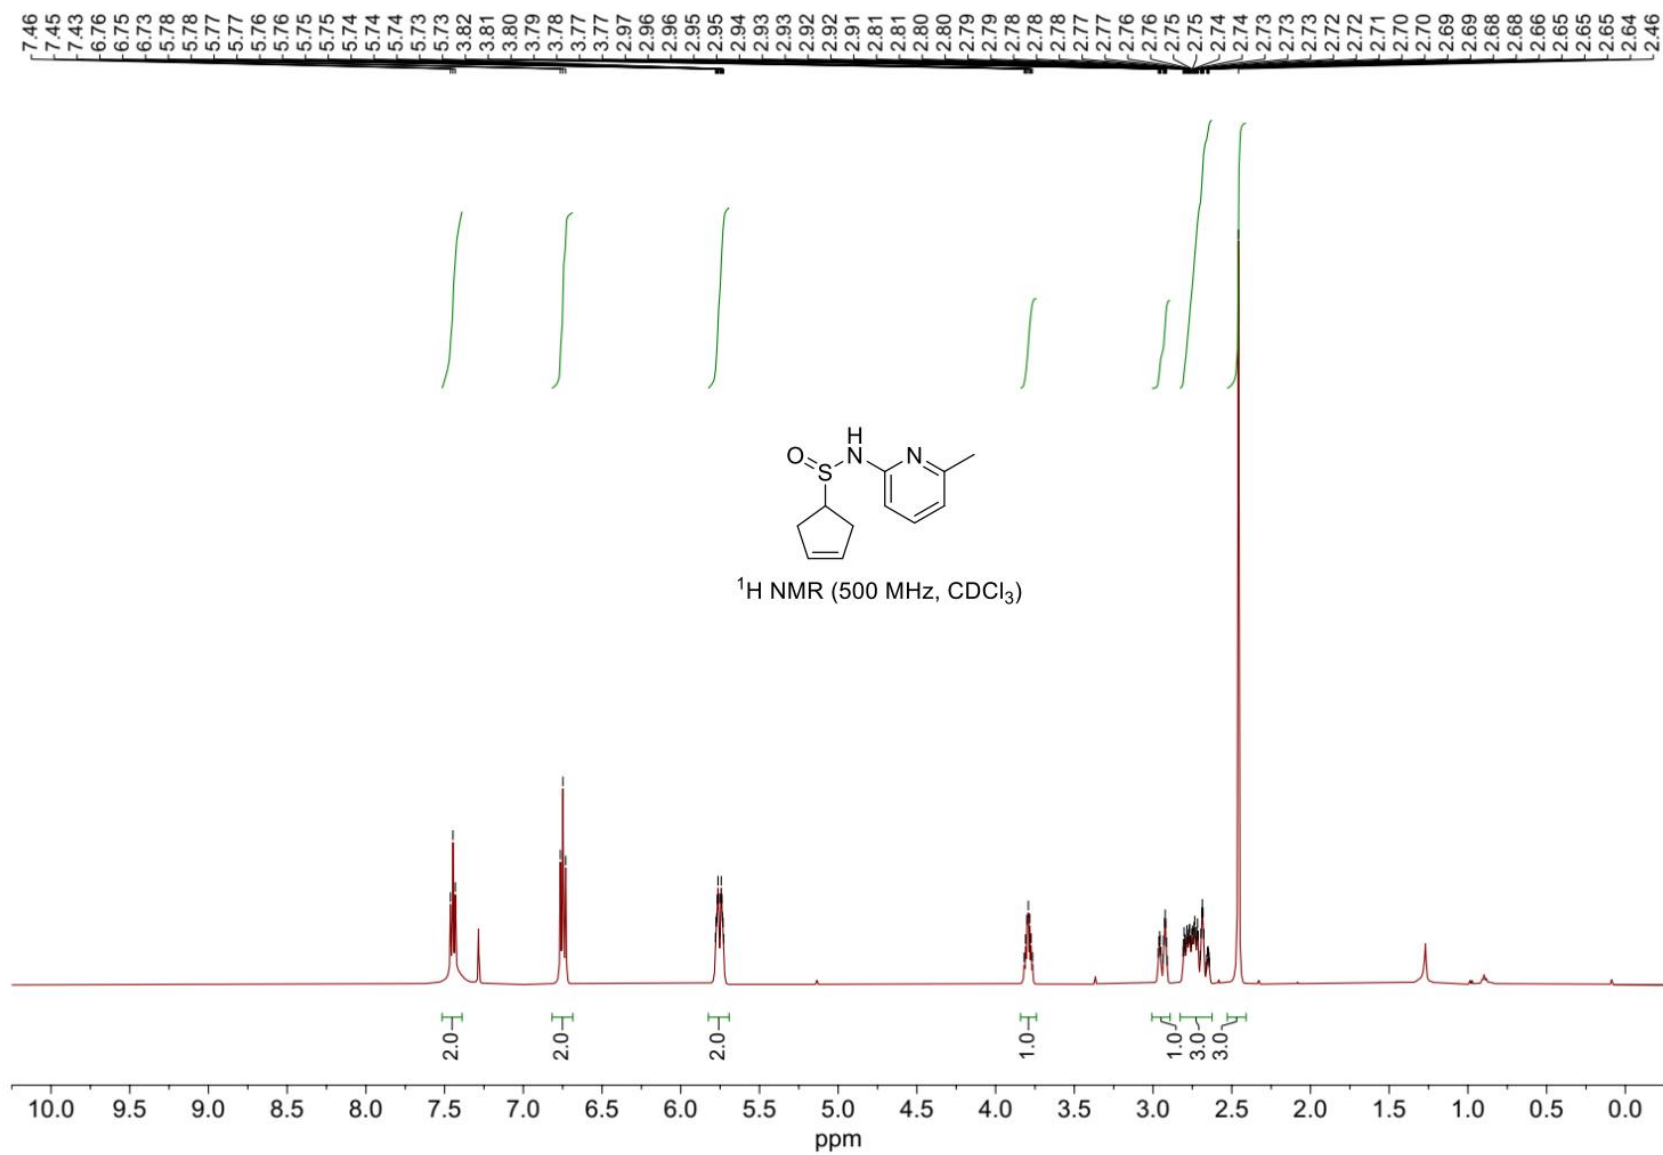



***N*-(6-Methylpyridin-2-yl)cyclopent-3-ene-1-sulfonamide (4e)**

—157.6  
—154.1  
  
—138.6  
129.2  
129.1  
  
—117.2  
—106.8  
  
—61.3  
  
33.6  
33.4  
—24.1

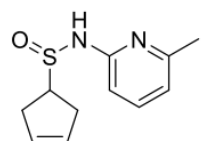

<sup>13</sup>C NMR (125 MHz, CDCl<sub>3</sub>)

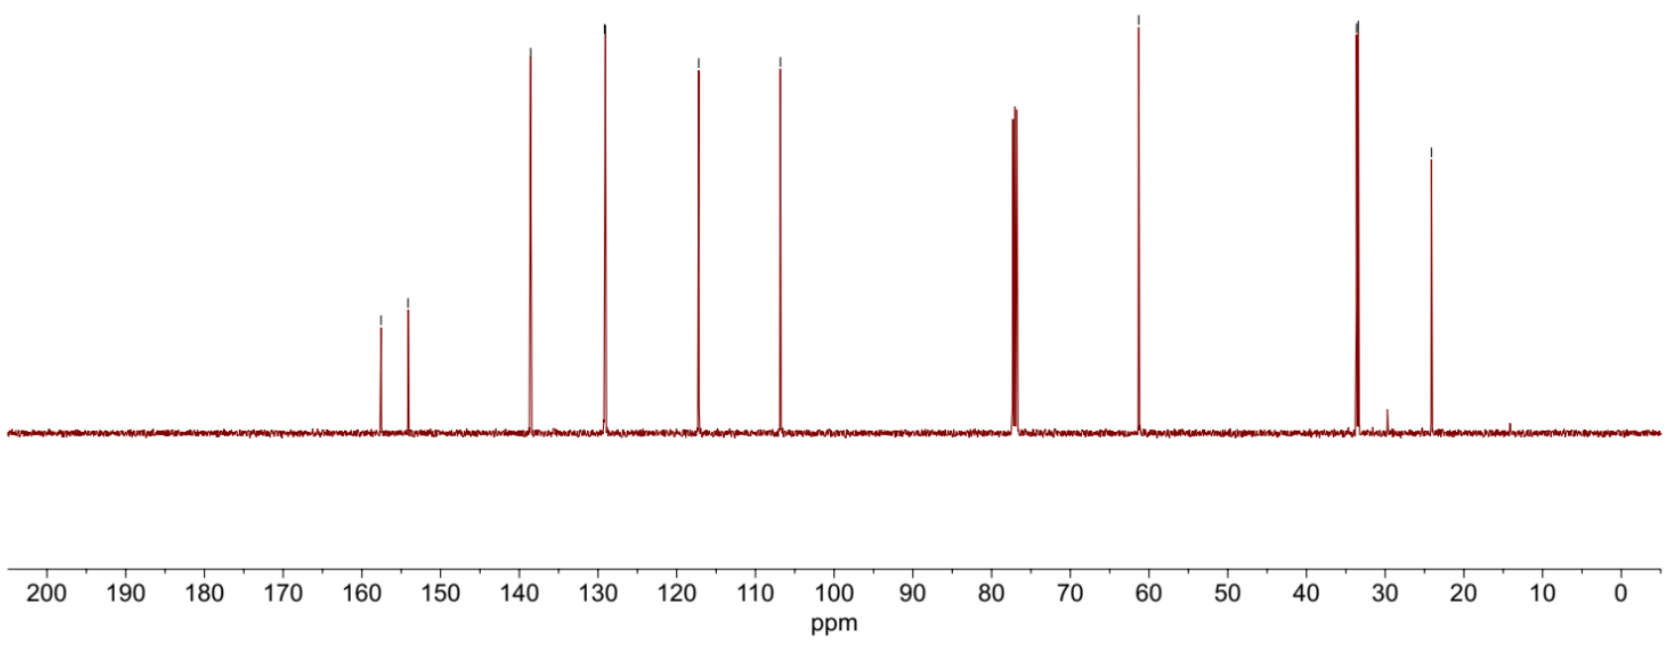

***N*-(5-Bromopyrimidin-2-yl)-5-chloropentane-1-sulfonamide (4f)**

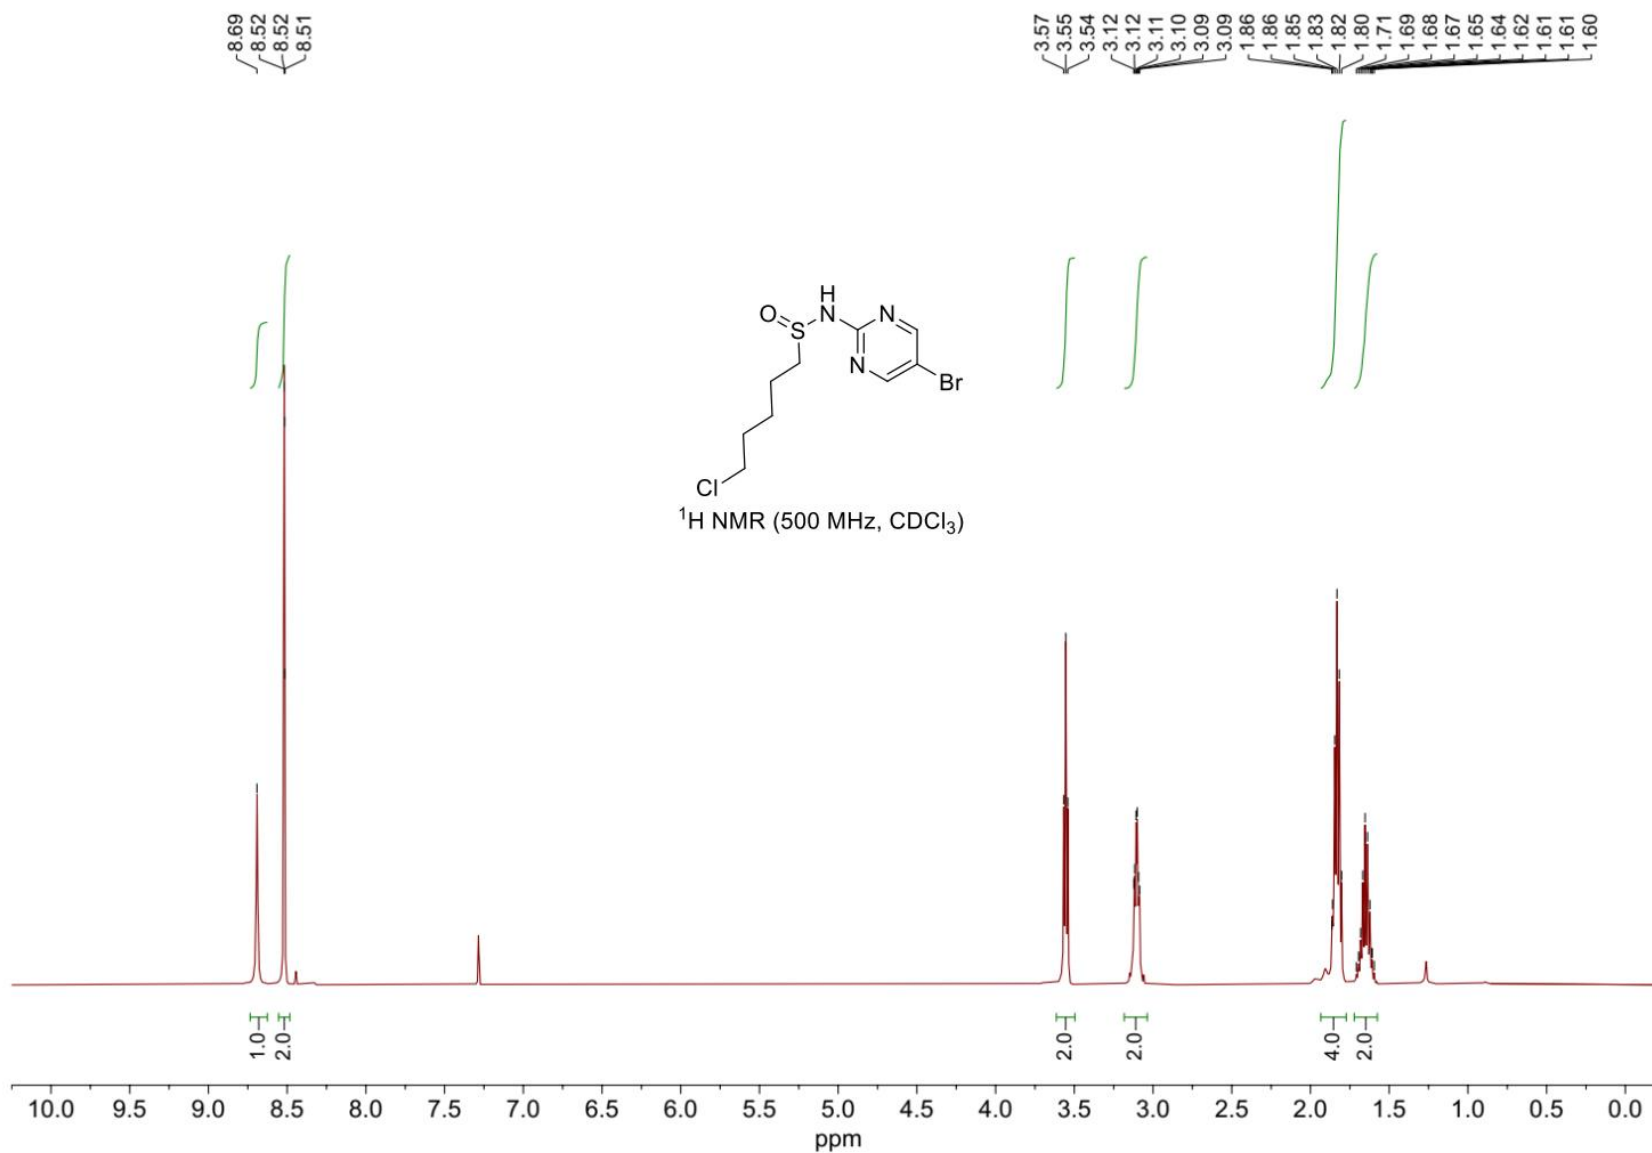

N-(5-Bromopyrimidin-2-yl)-5-chloropentane-1-sulfonamide (4f)

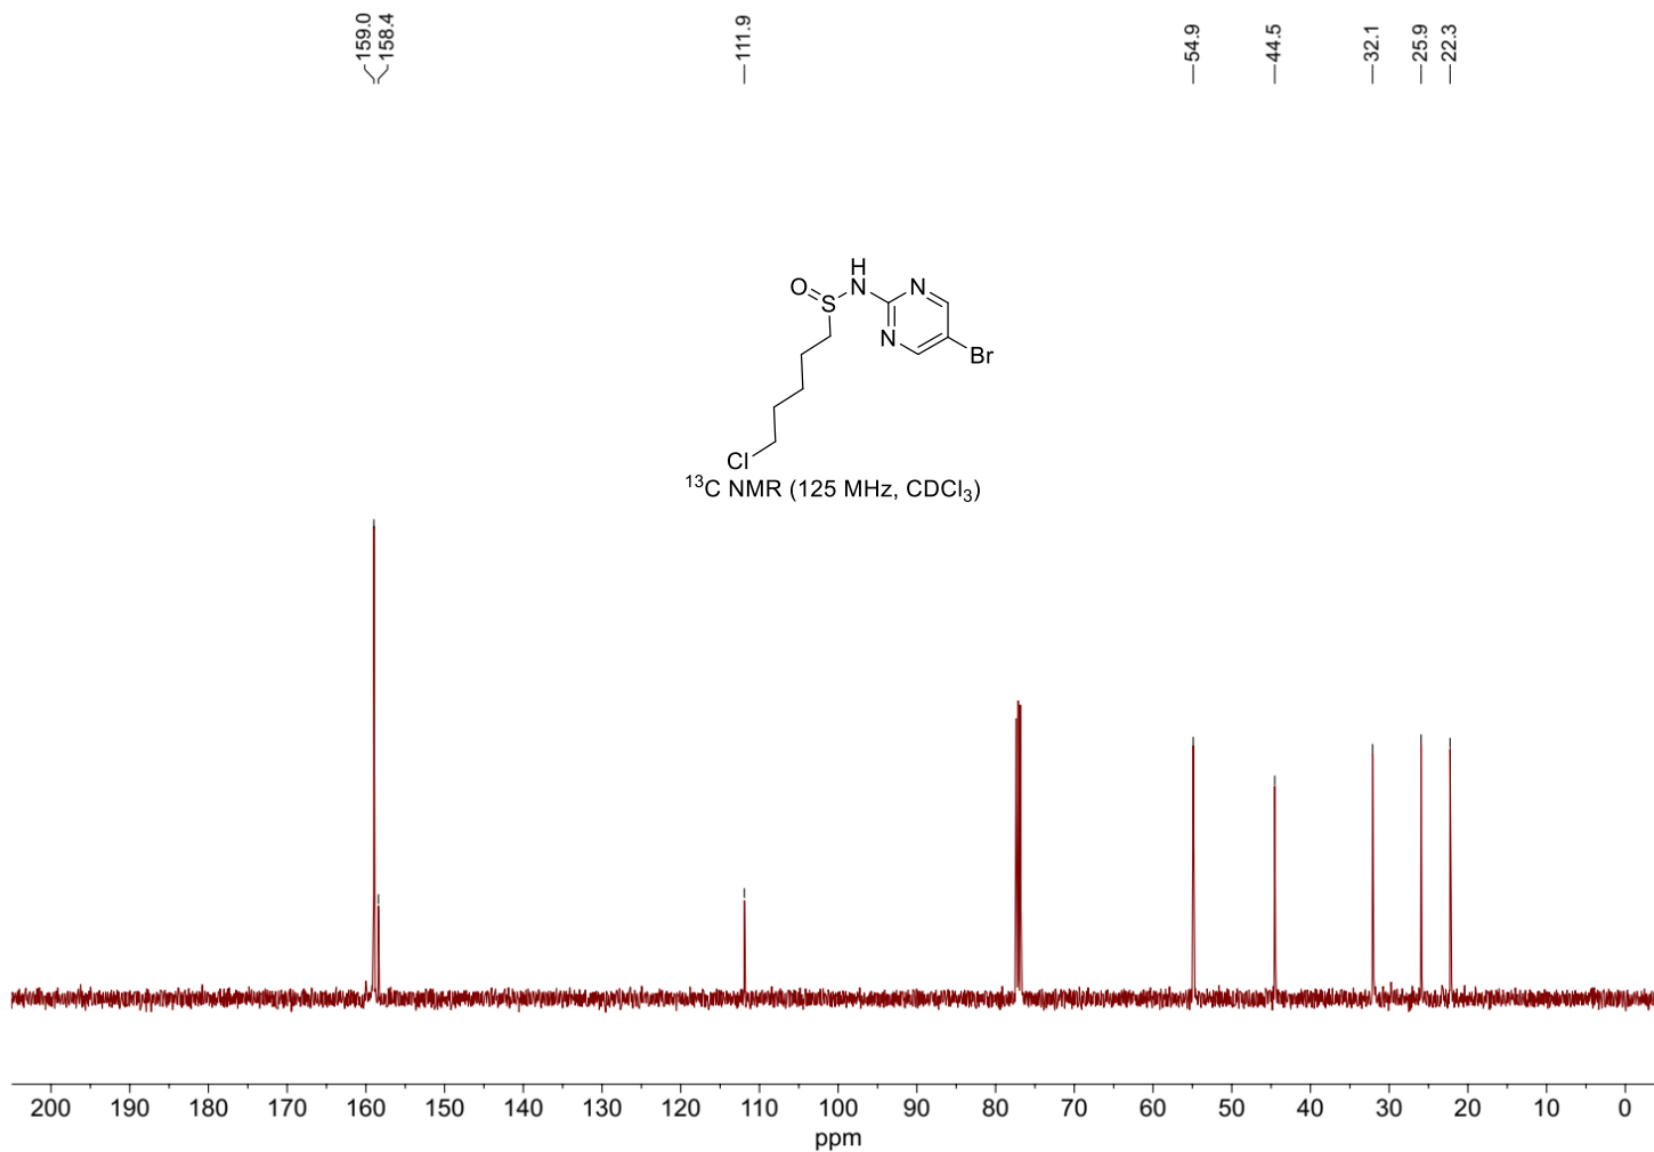

**N-(Benzo[d]thiazol-5-yl)-1-methylcyclohexane-1-sulfonamide (4g)**

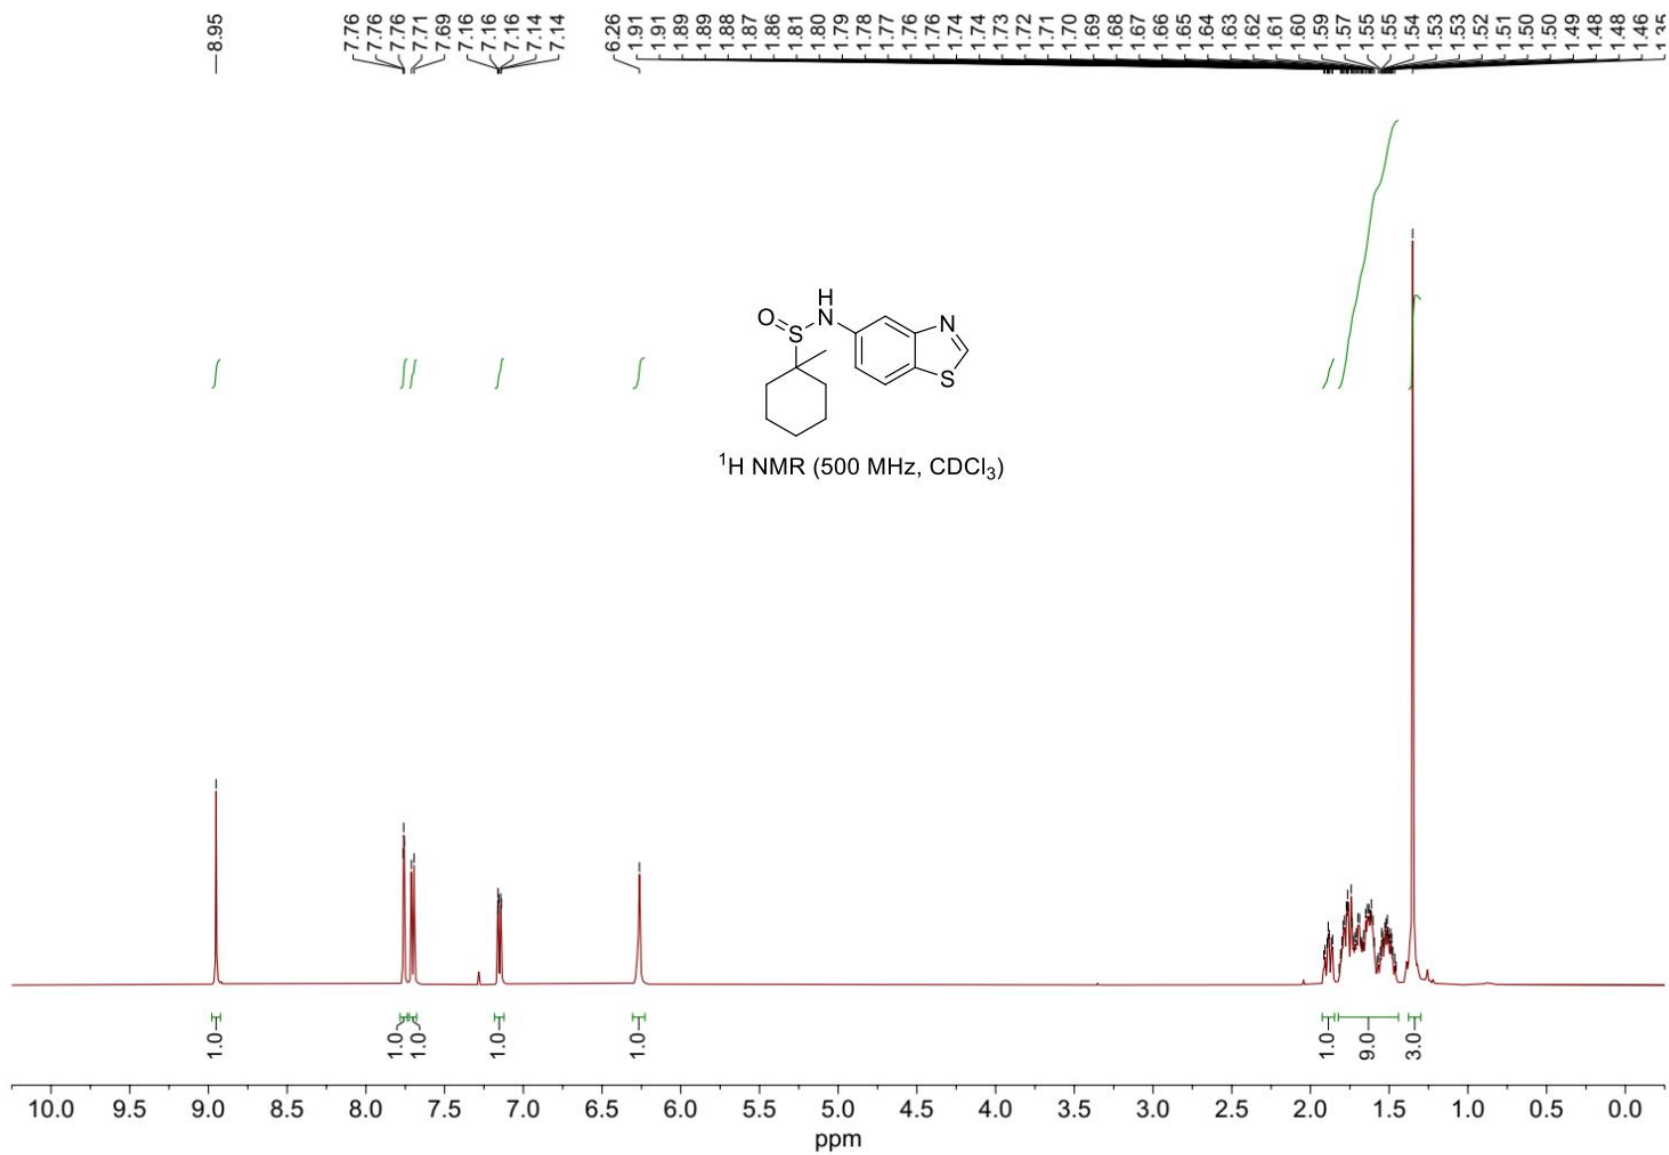

**N-(Benzo[d]thiazol-5-yl)-1-methylcyclohexane-1-sulfonamide (4g)**

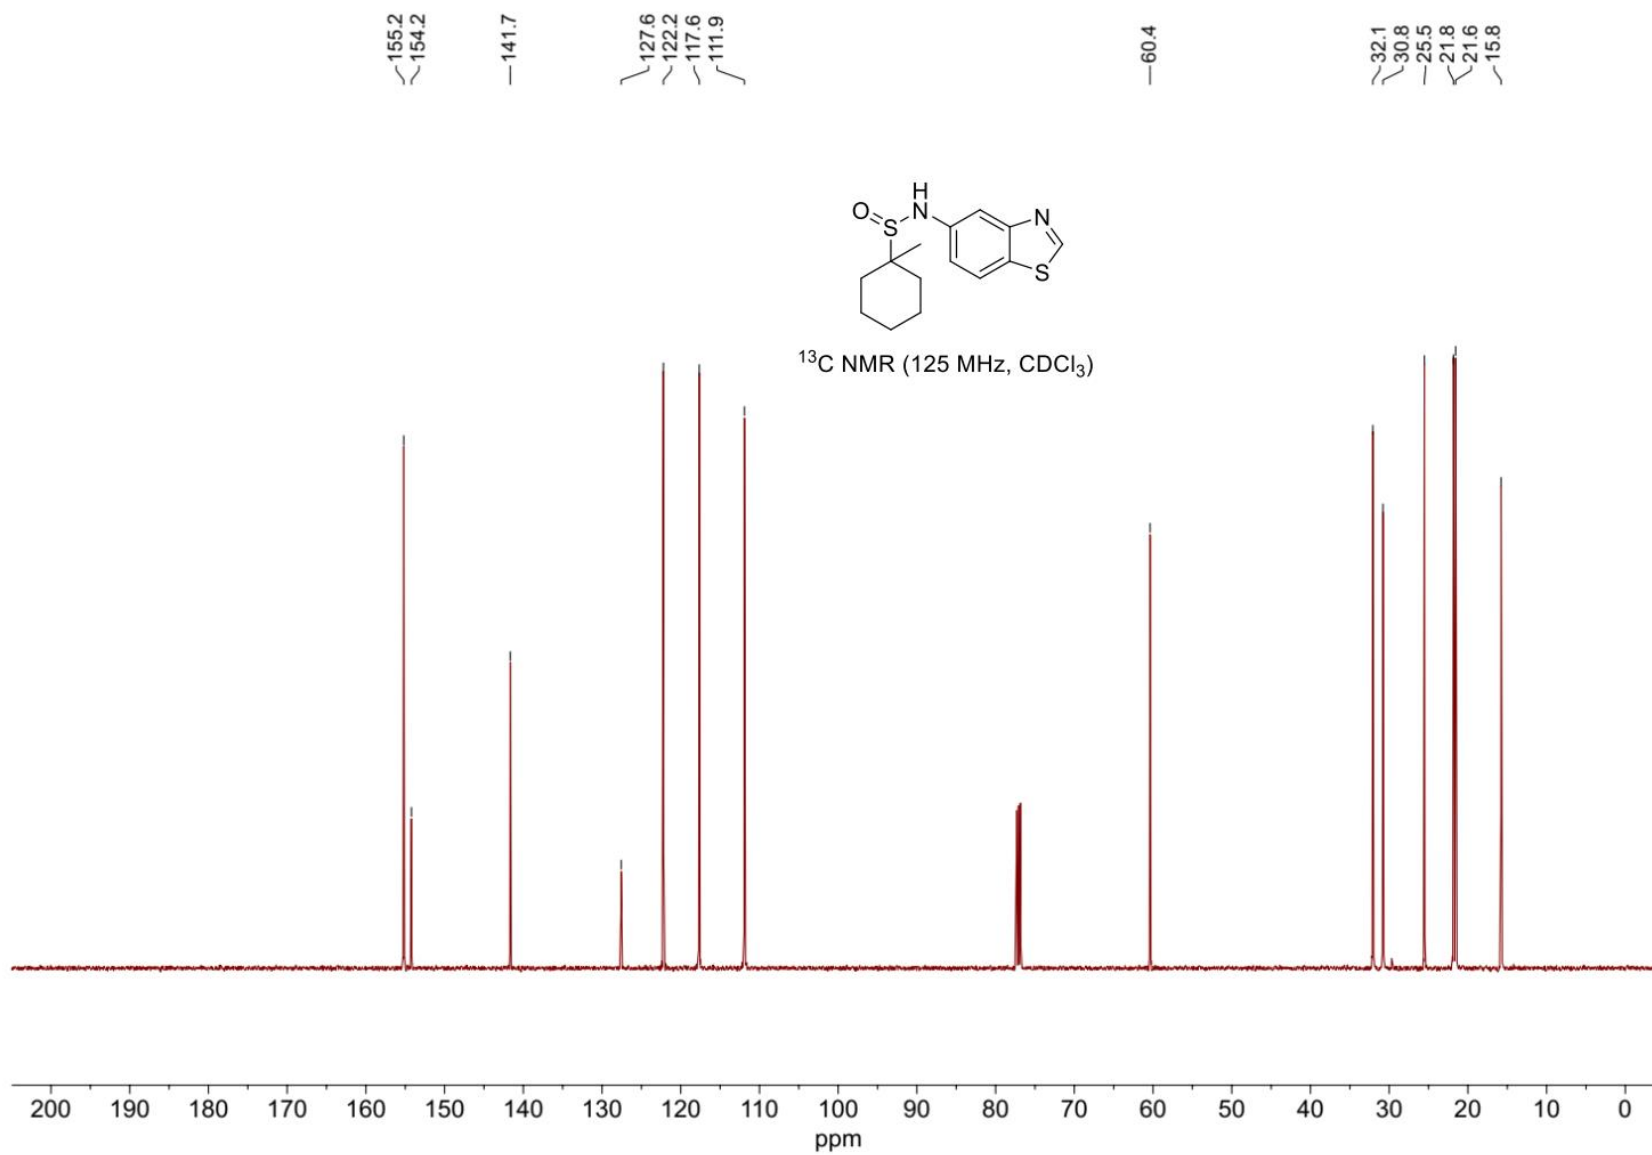

**N-(4-Chlorophenethyl)-5-(2,5-dimethylphenoxy)-2-methylpentane-2-sulfonamide (4h)**

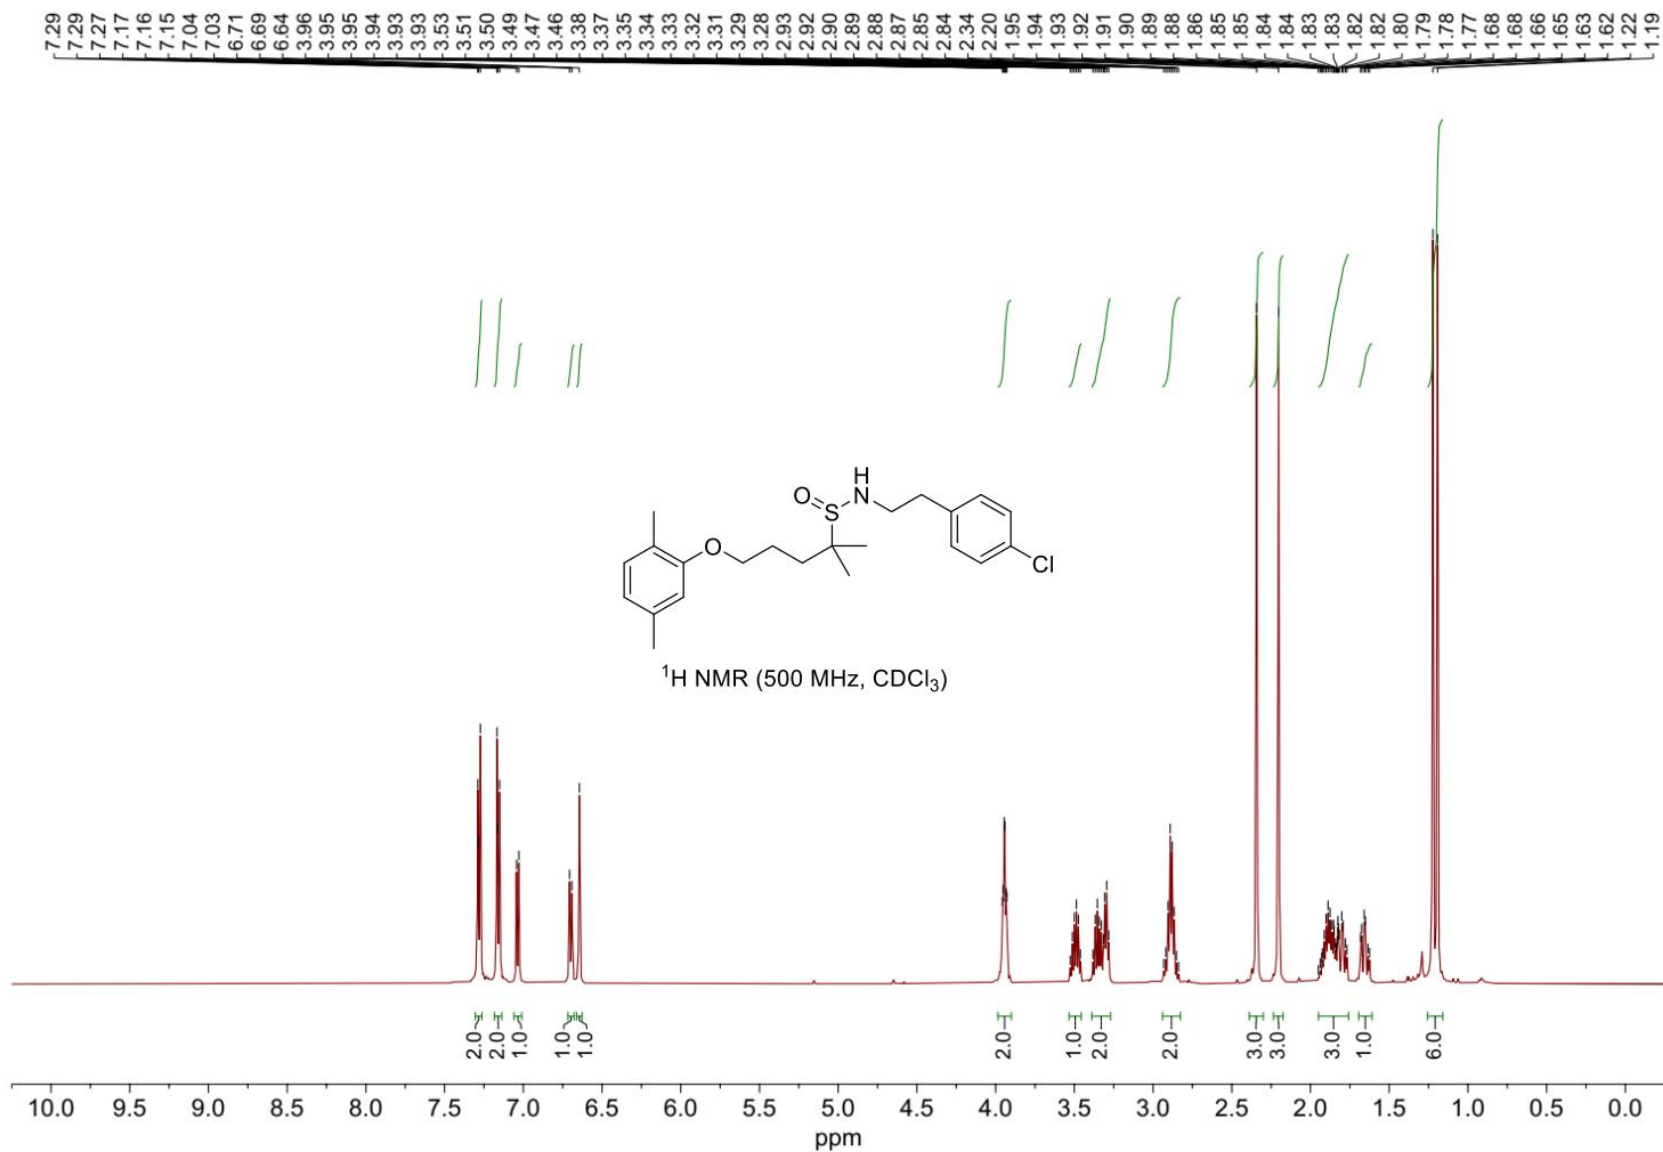

**N-(4-Chlorophenethyl)-5-(2,5-dimethylphenoxy)-2-methylpentane-2-sulfonamide (4h)**

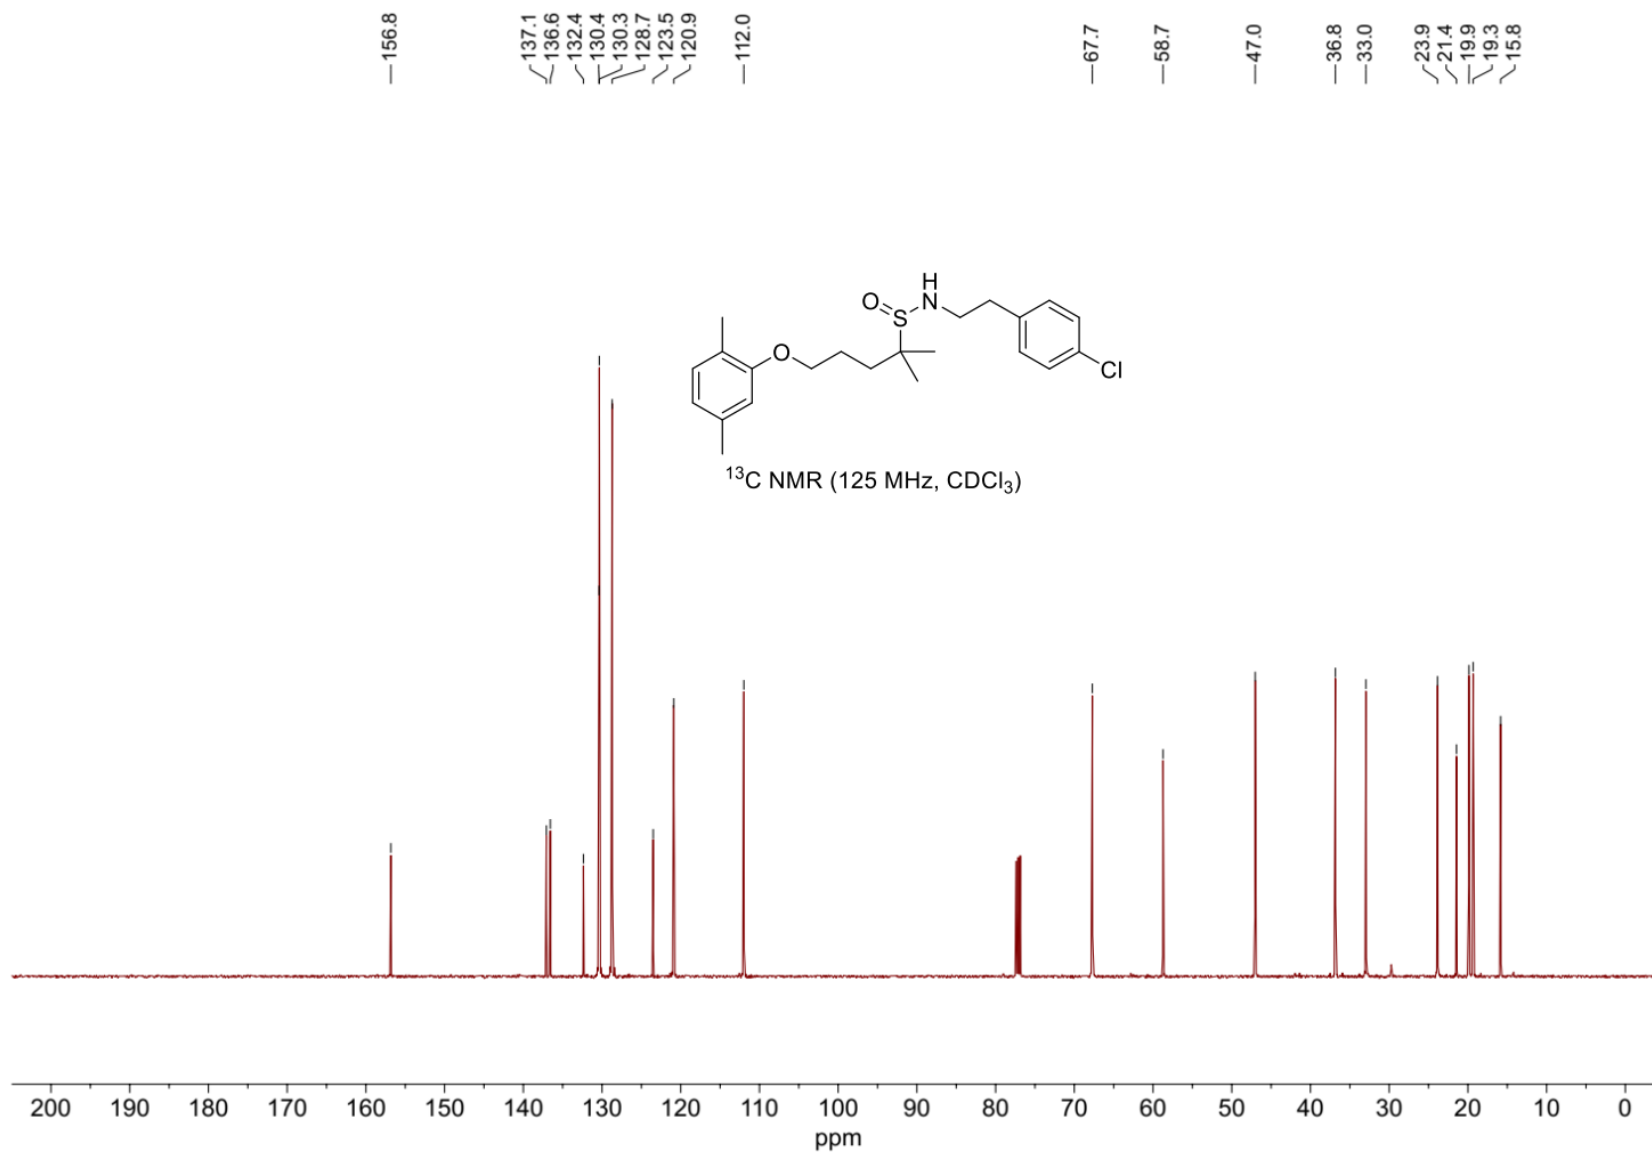

***N*-(1-Phenylethyl)pentadecane-7-sulfonamide (4i-1)**

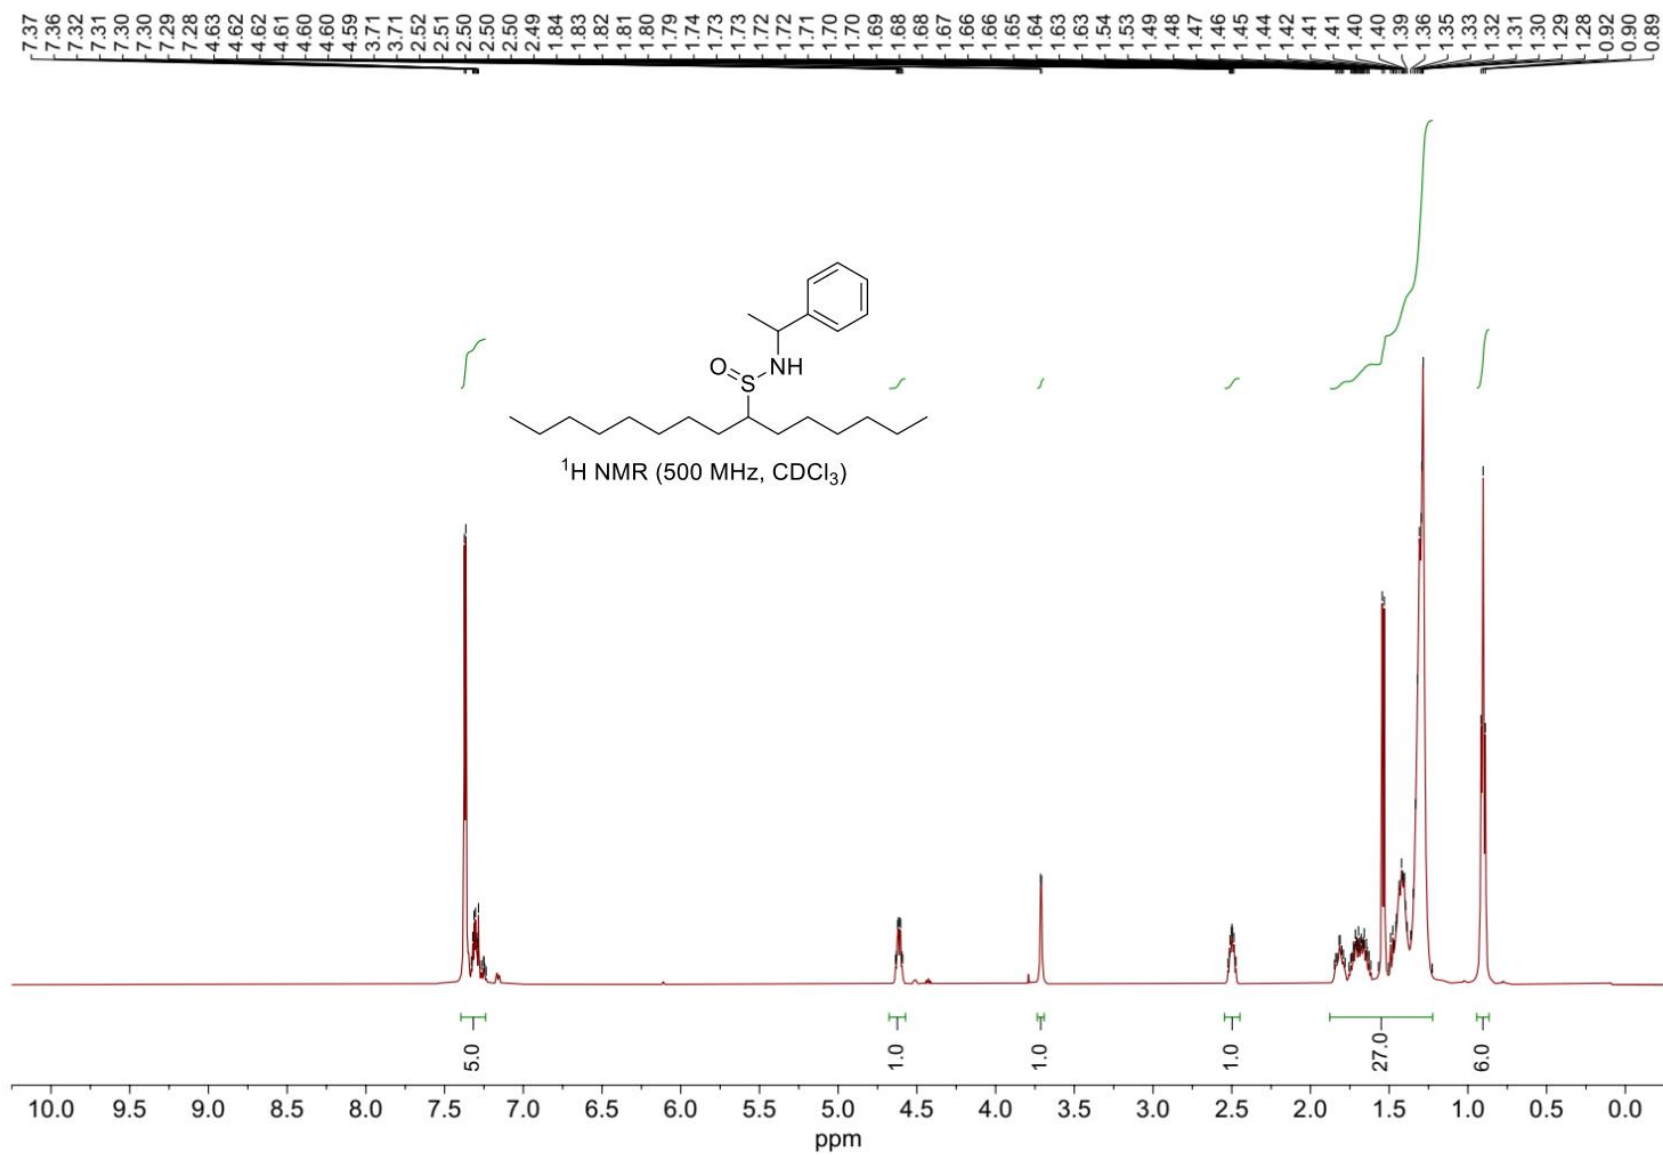



**N-(1-Phenylethyl)pentadecane-7-sulfonamide (4i-1)**

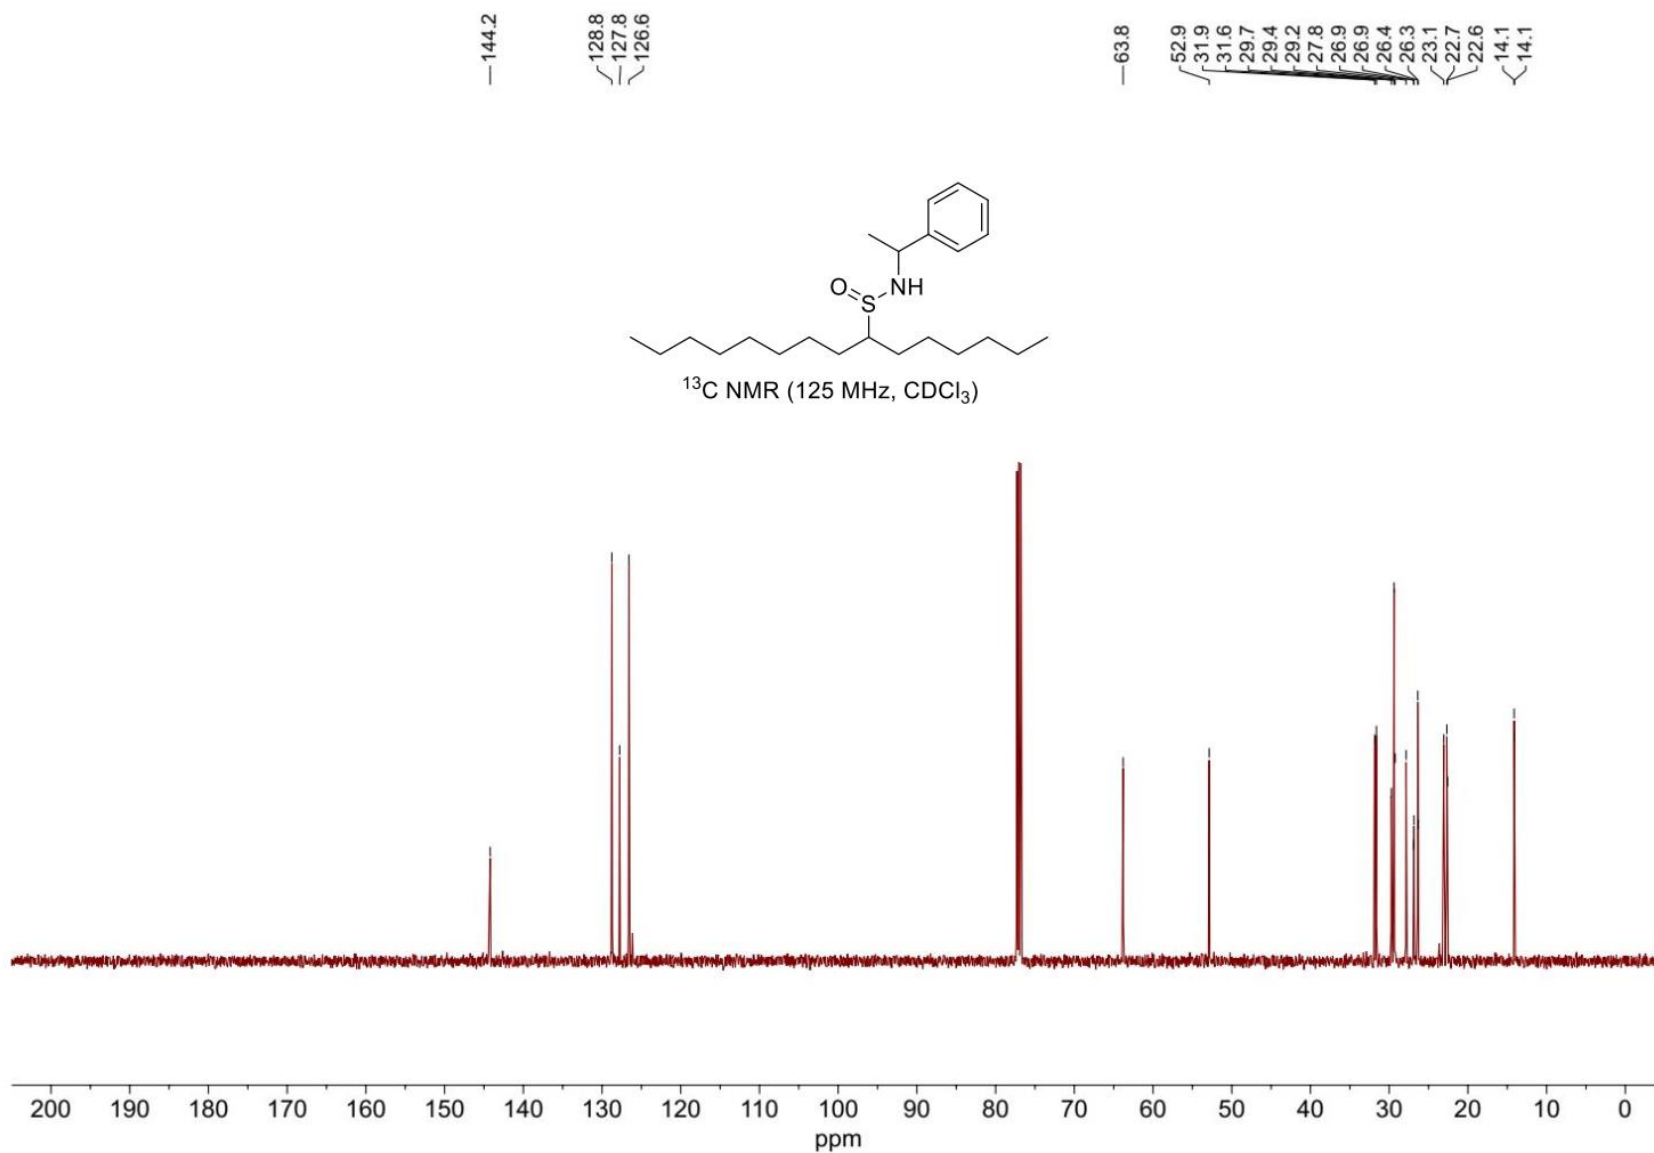

**N-(1-Phenylethyl)pentadecane-7-sulfonamide (4i-2)**

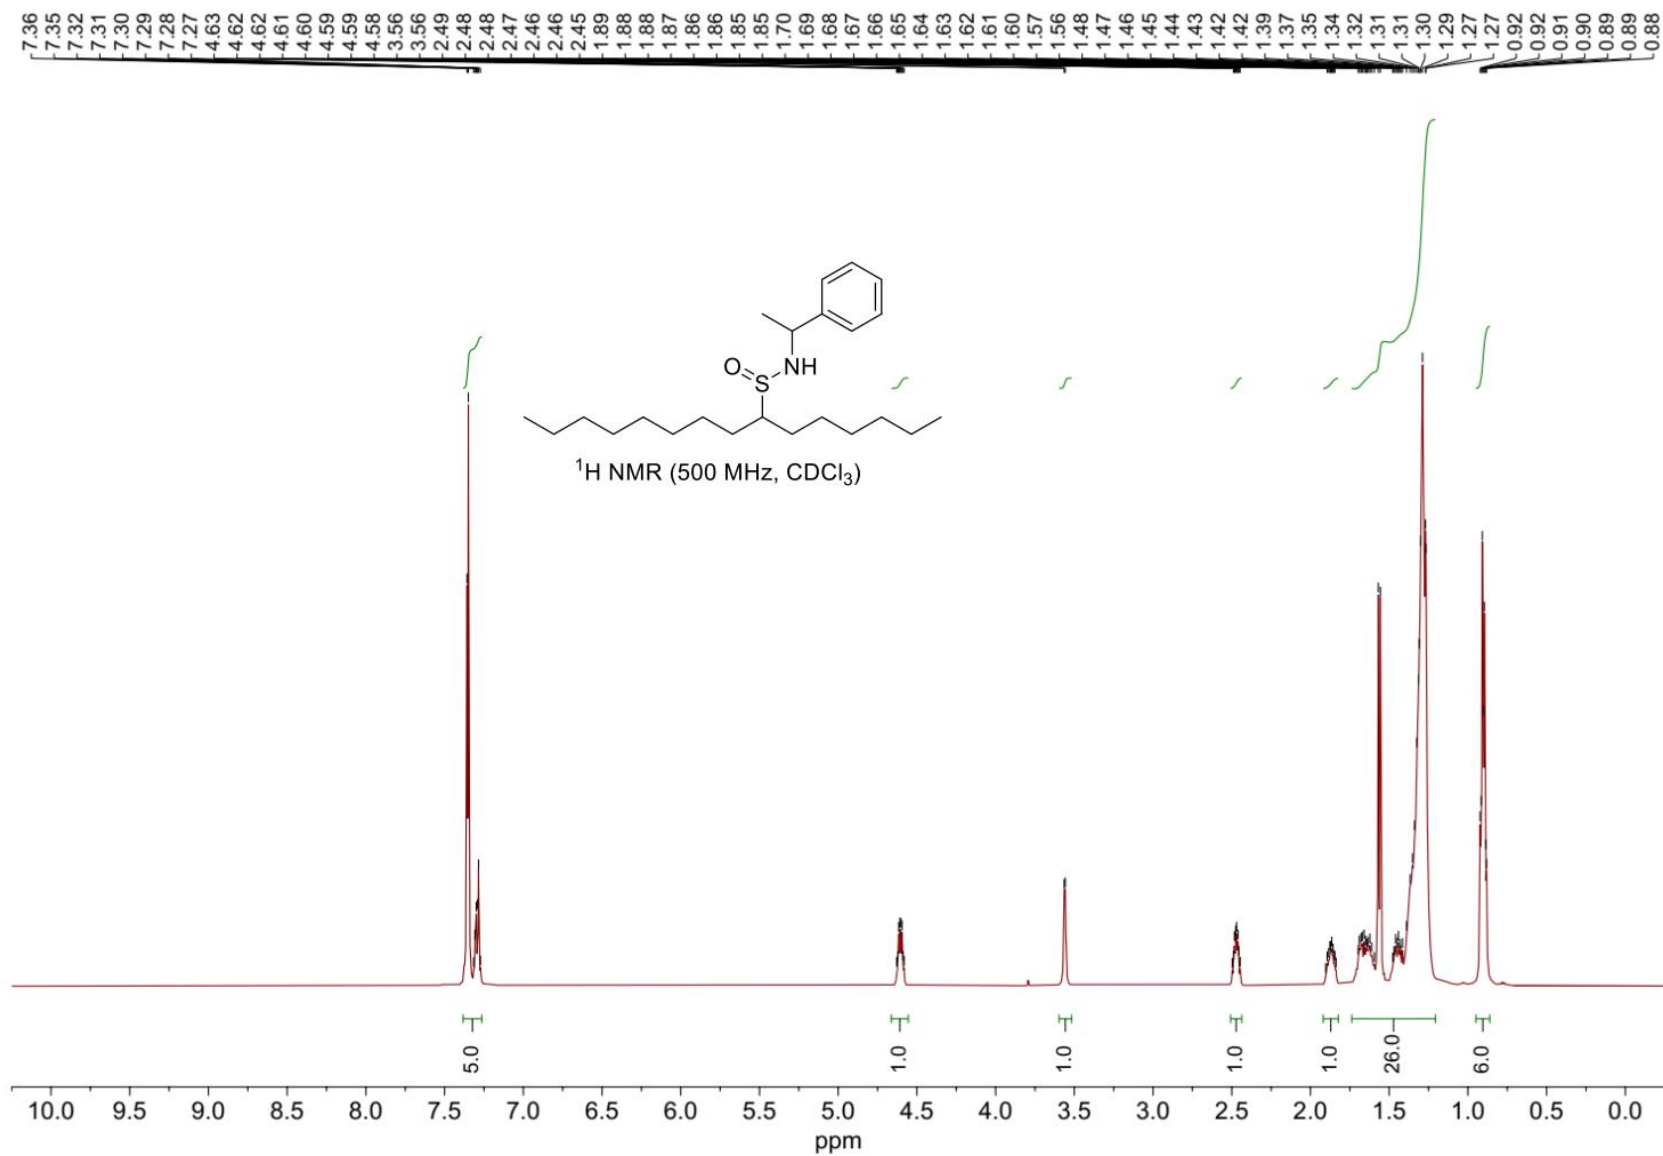

# N-(1-Phenylethyl)pentadecane-7-sulfonamide (4i-2)

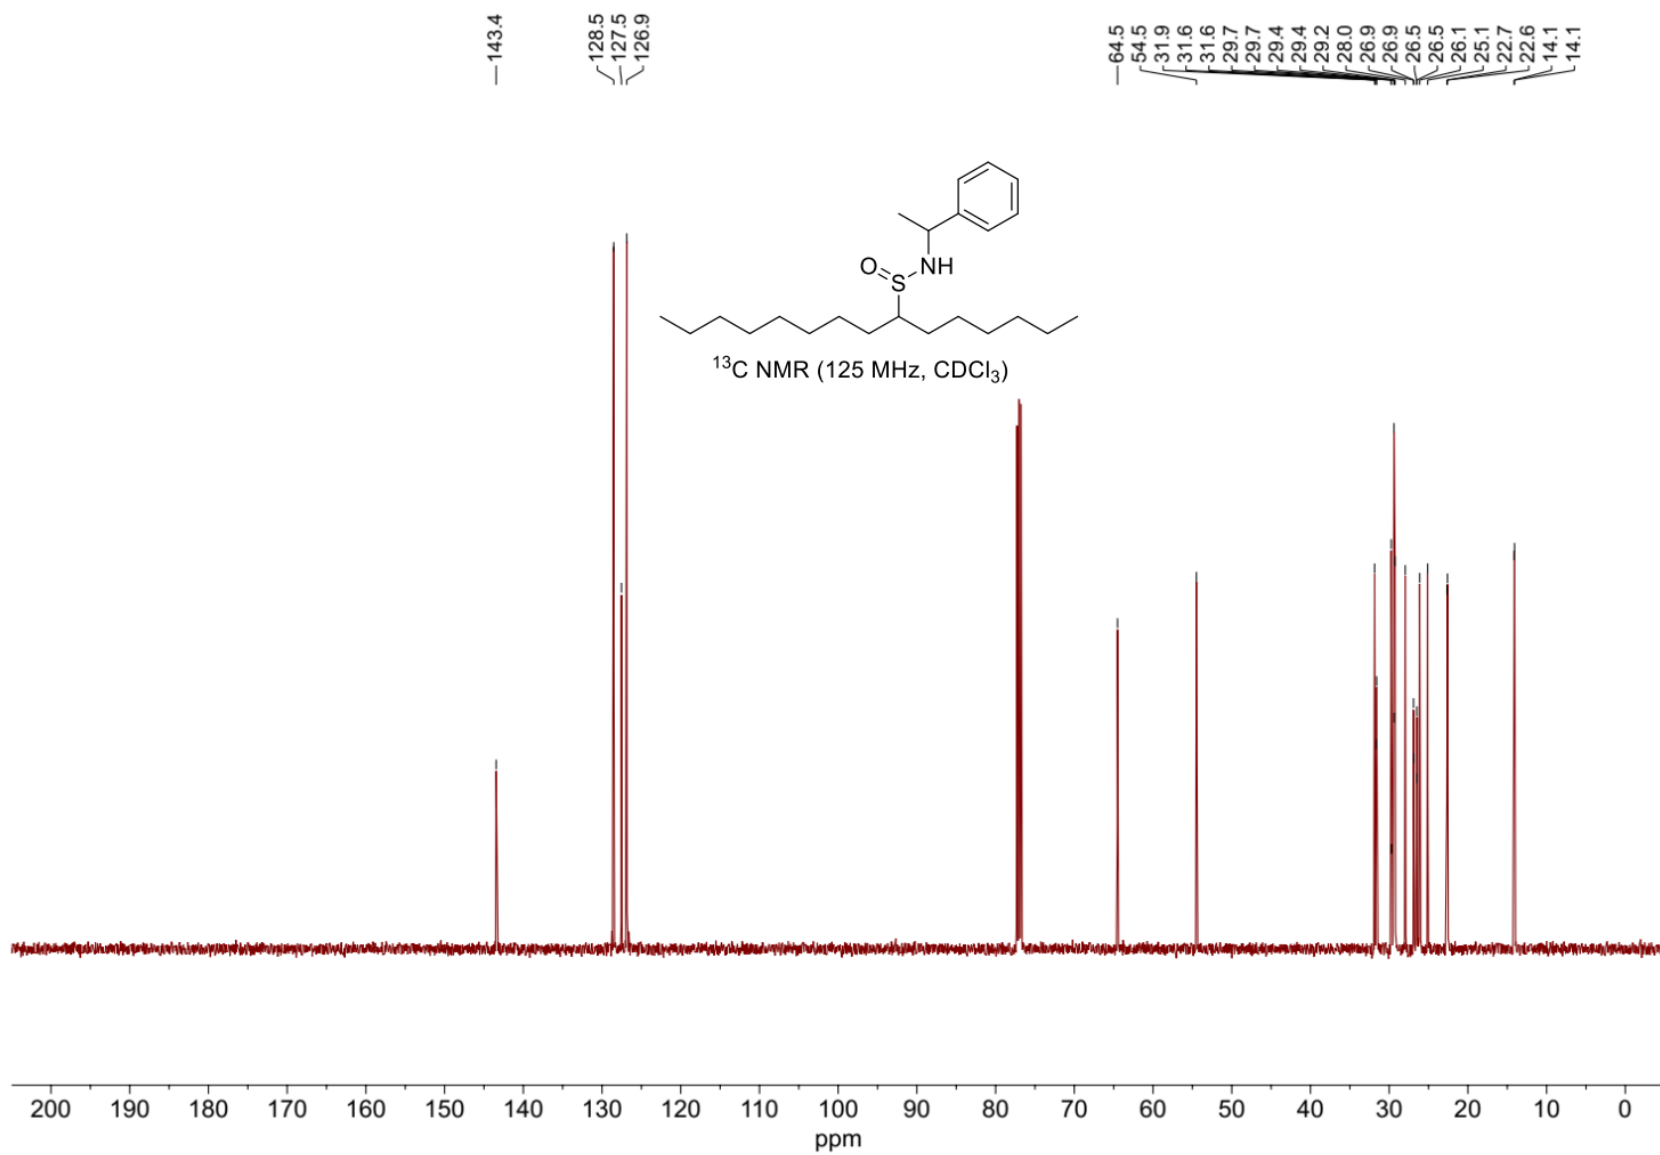

### Nonane-1-sulfonamide (6a)

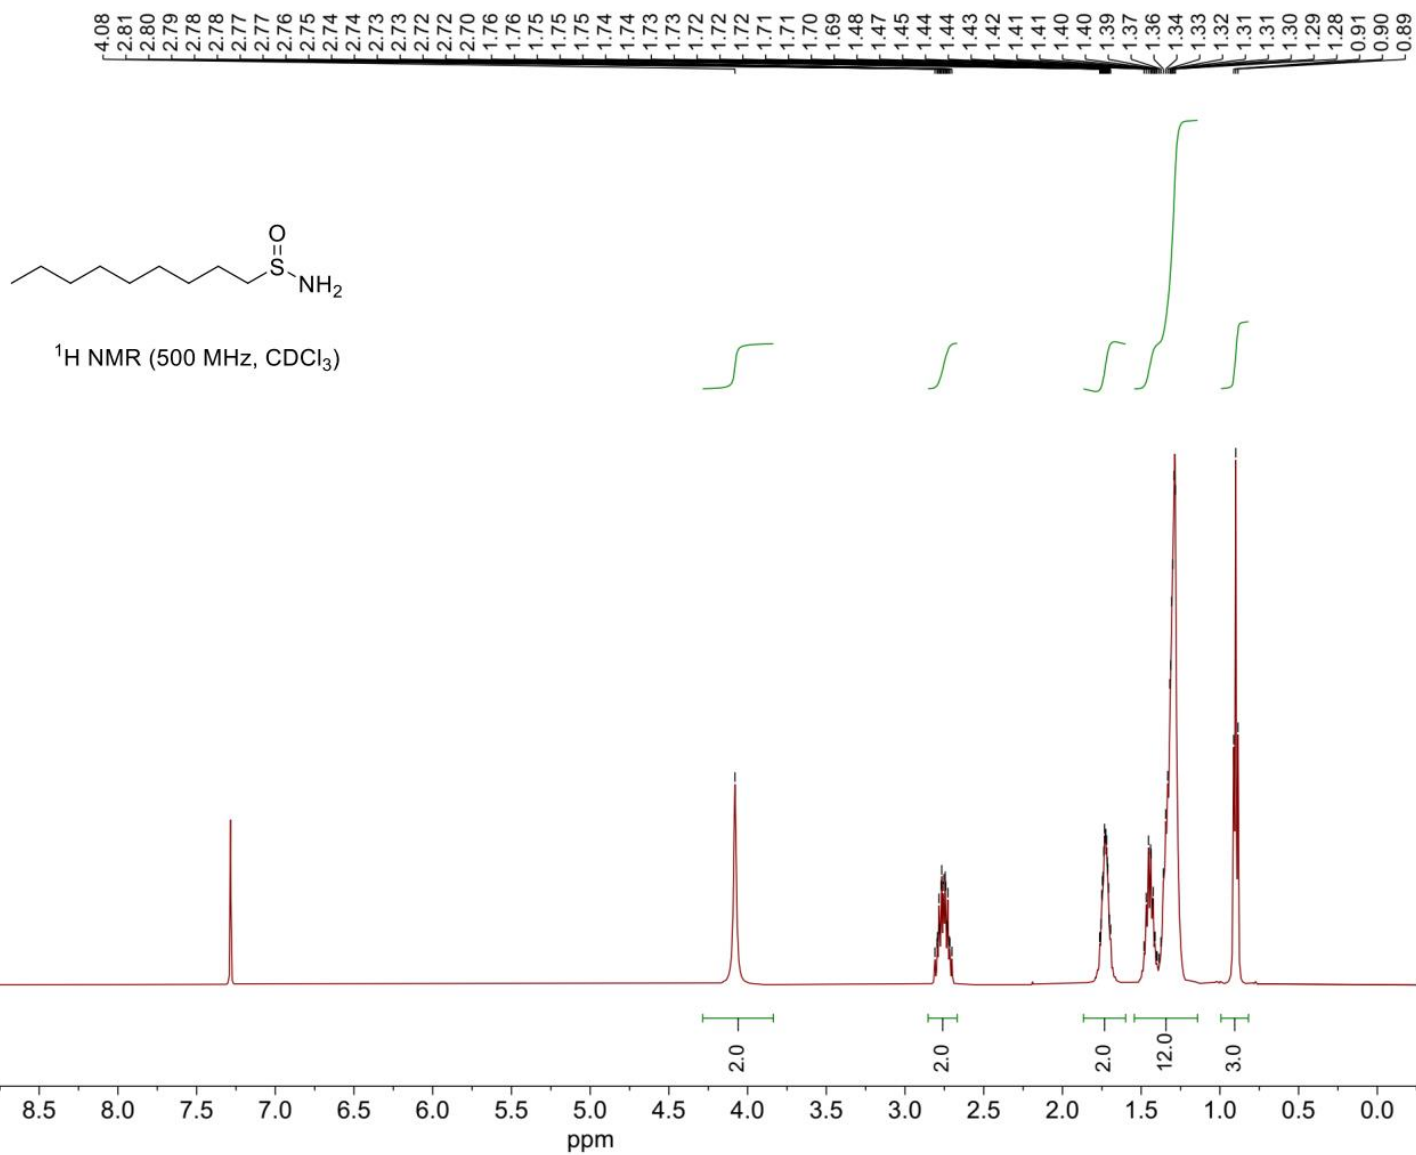

# Nonane-1-sulfonamide (6a)

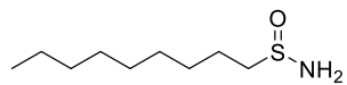

$^{13}\text{C}$  NMR (125 MHz,  $\text{CDCl}_3$ )

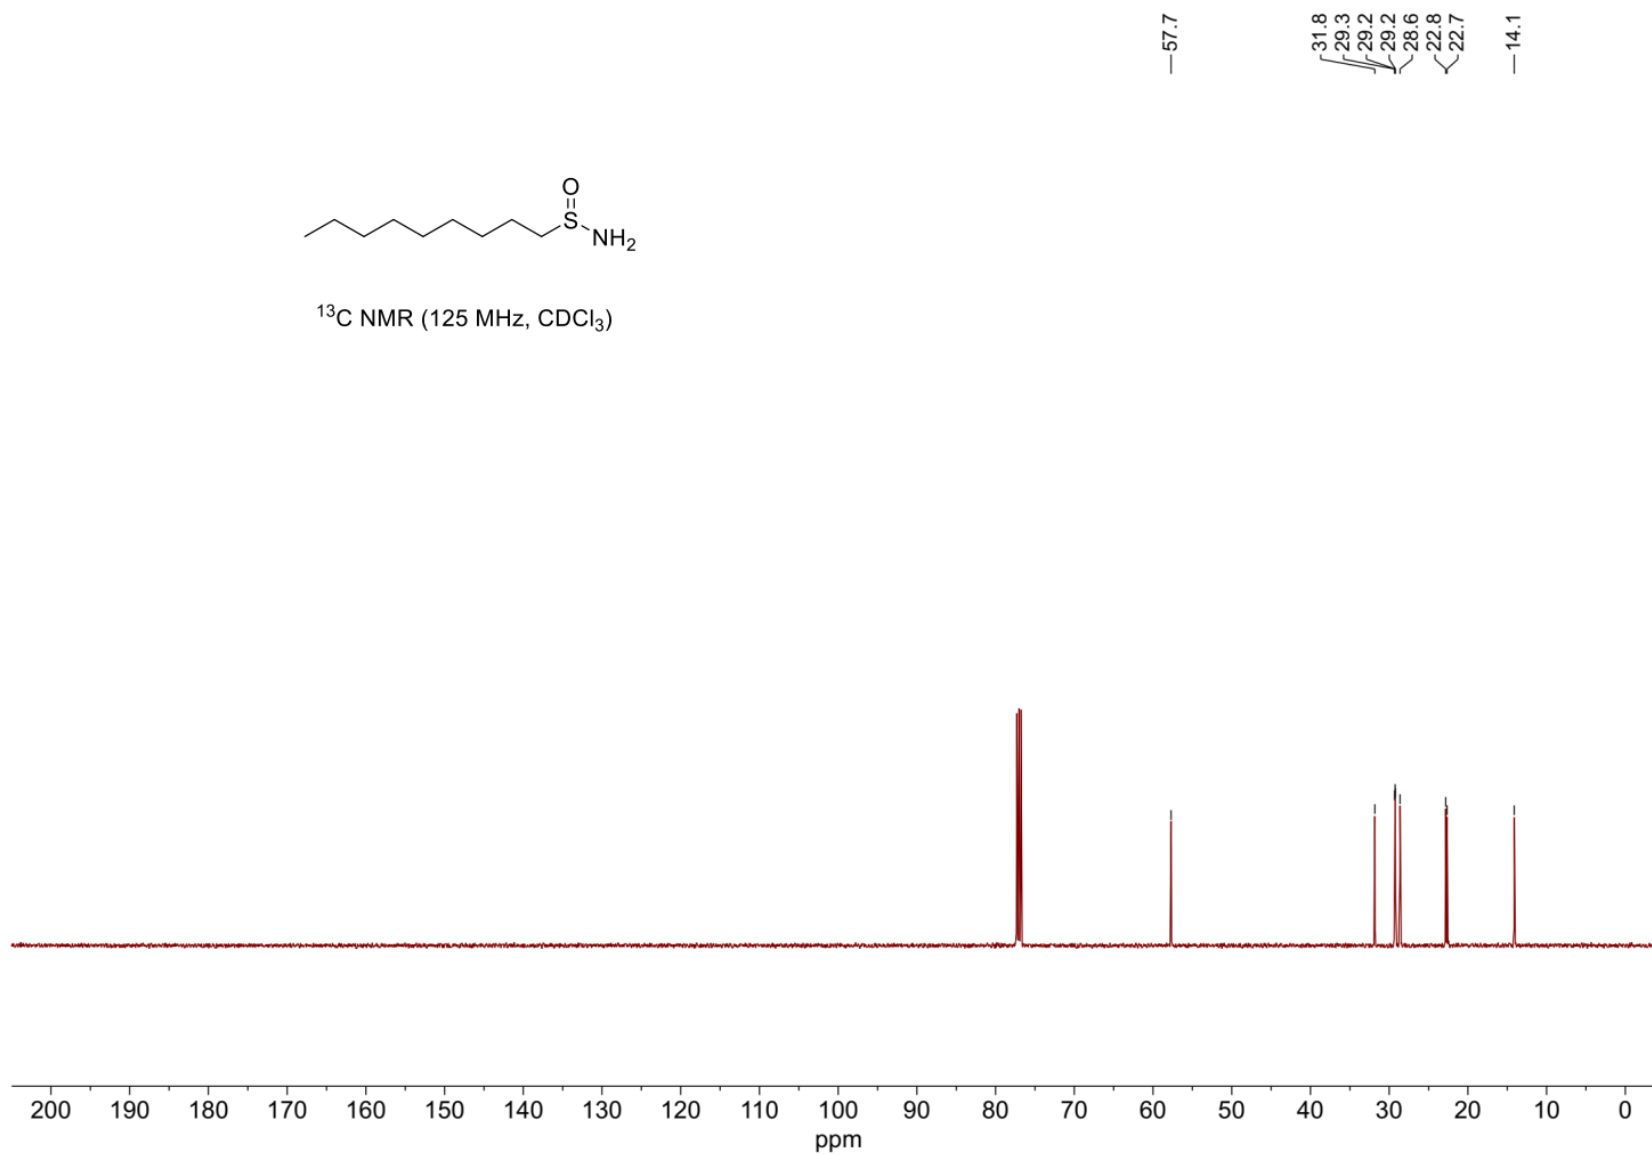

### 5-Chloropentane-1-sulfonamide (6b)

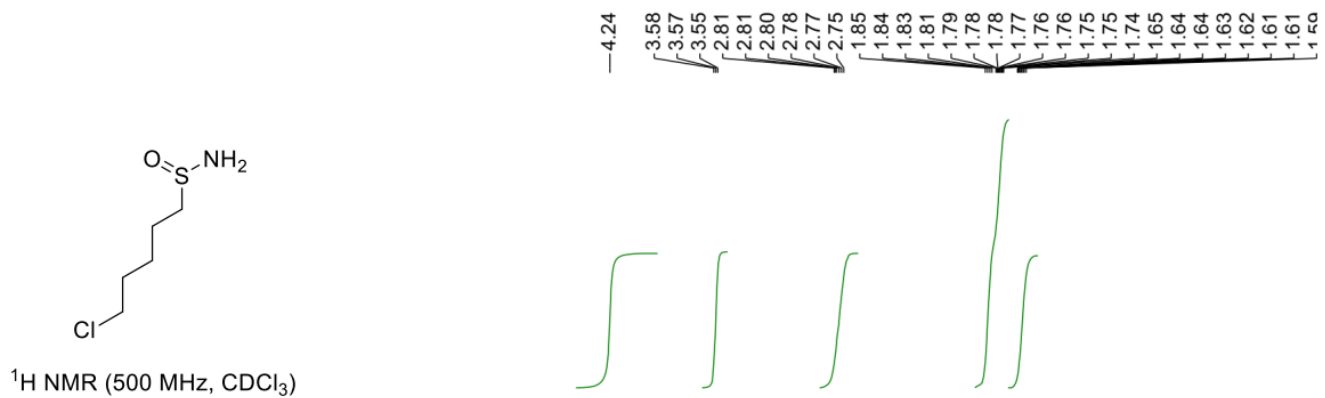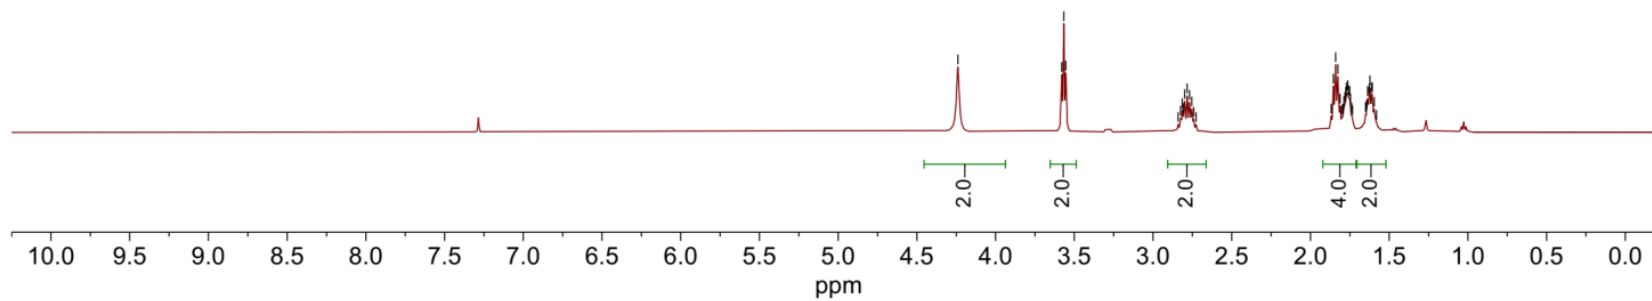

### 5-Chloropentane-1-sulfonamide (6b)

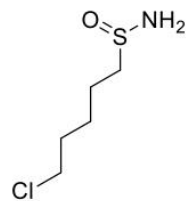

$^{13}\text{C}$  NMR (125 MHz,  $\text{CDCl}_3$ )

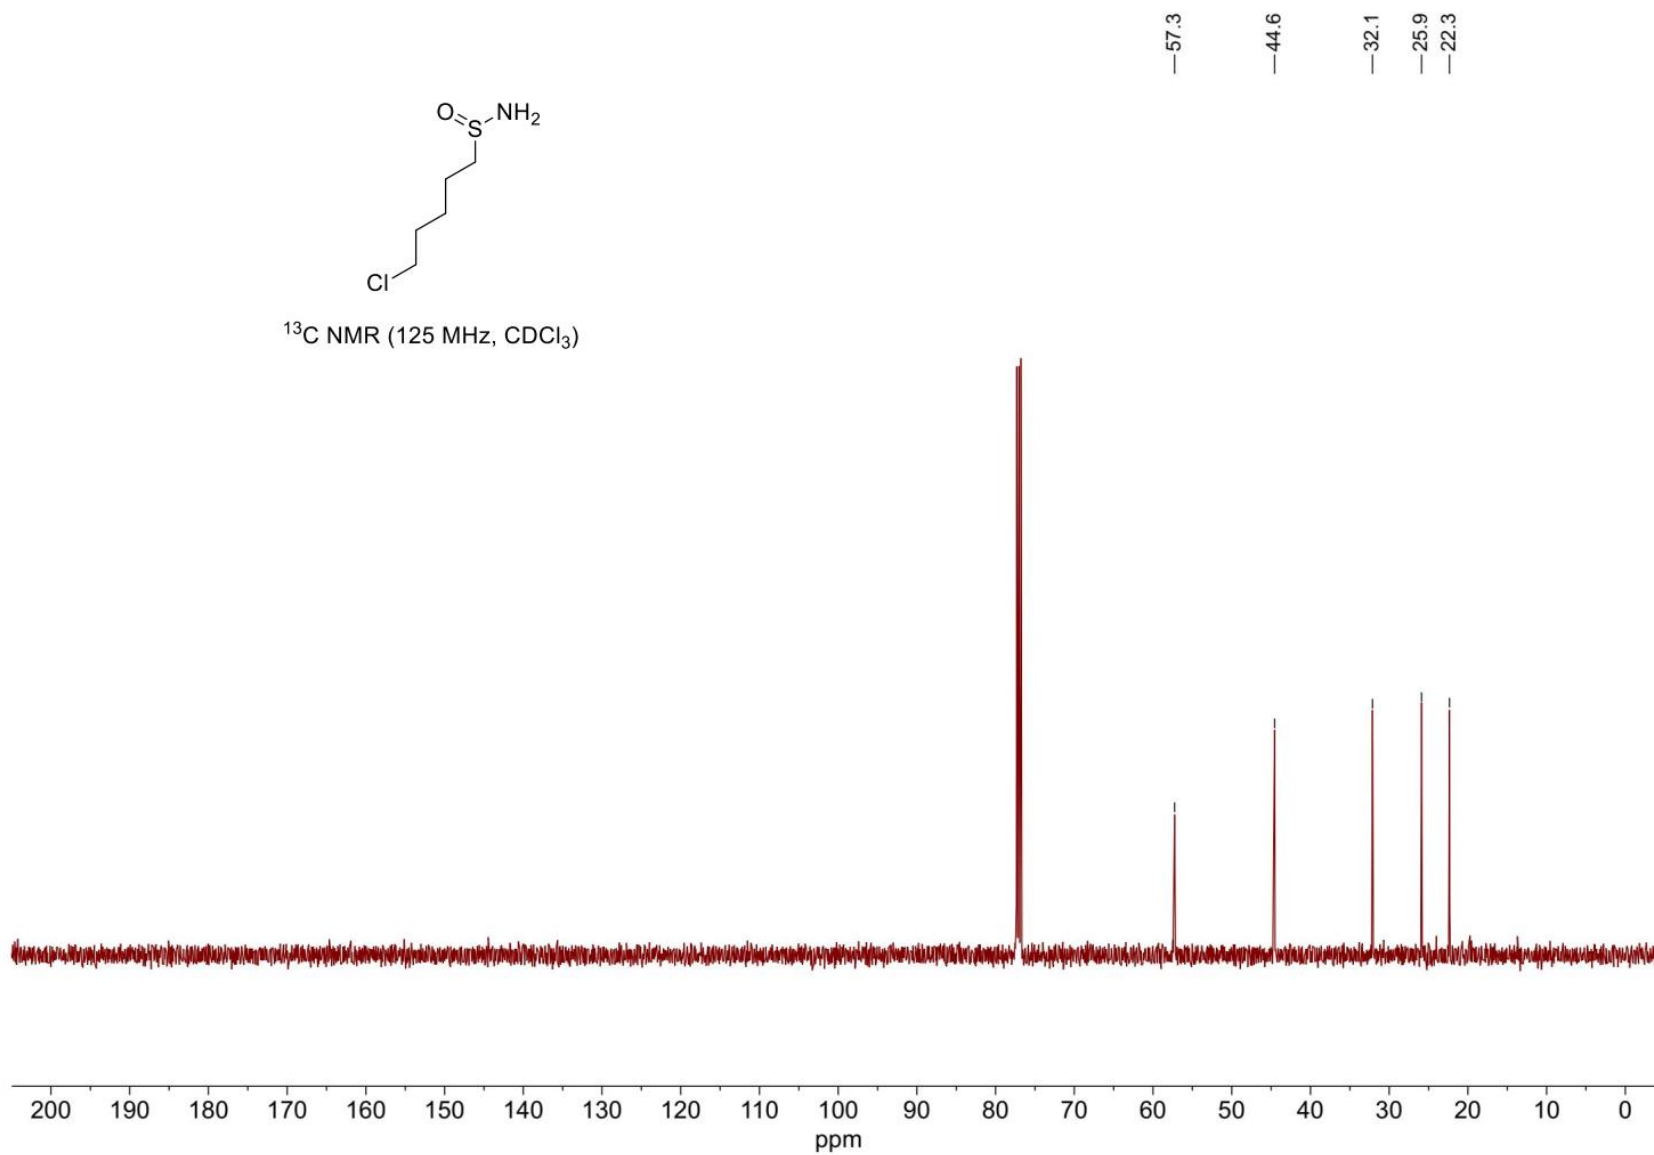

# Cycloheptanesulfinamide (6c)

3.94  
2.65  
2.64  
2.63  
2.62  
2.61  
2.60  
2.59  
2.21  
2.20  
2.19  
2.18  
2.17  
2.17  
2.08  
2.07  
2.06  
2.06  
2.05  
2.04  
2.03  
1.87  
1.86  
1.85  
1.85  
1.84  
1.83  
1.82  
1.82  
1.81  
1.80  
1.80  
1.79  
1.78  
1.72  
1.70  
1.69  
1.68  
1.67  
1.66  
1.65  
1.64  
1.64  
1.63  
1.62  
1.62  
1.61  
1.61  
1.60  
1.60  
1.59  
1.58  
1.57  
1.57  
1.56  
1.55  
1.54  
1.54  
1.53  
1.52  
1.52  
1.51  
1.50

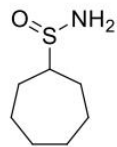

<sup>1</sup>H NMR (500 MHz, CDCl<sub>3</sub>)

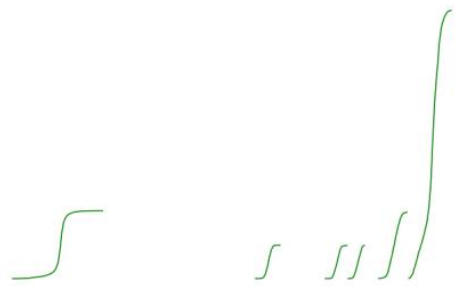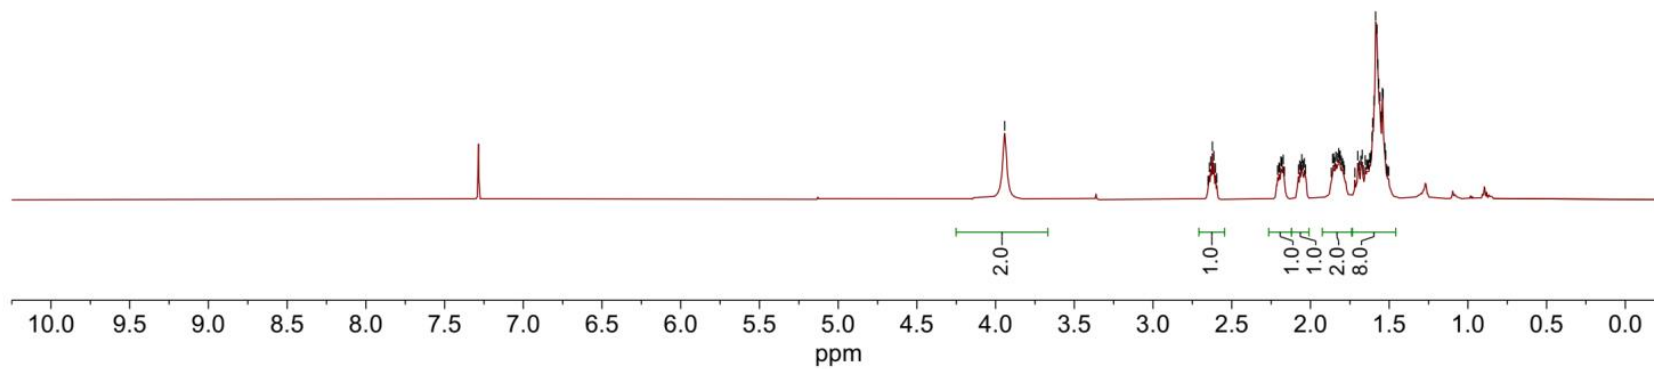



# Cycloheptanesulfinamide (6c)

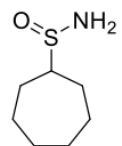

$^{13}\text{C}$  NMR (125 MHz,  $\text{CDCl}_3$ )

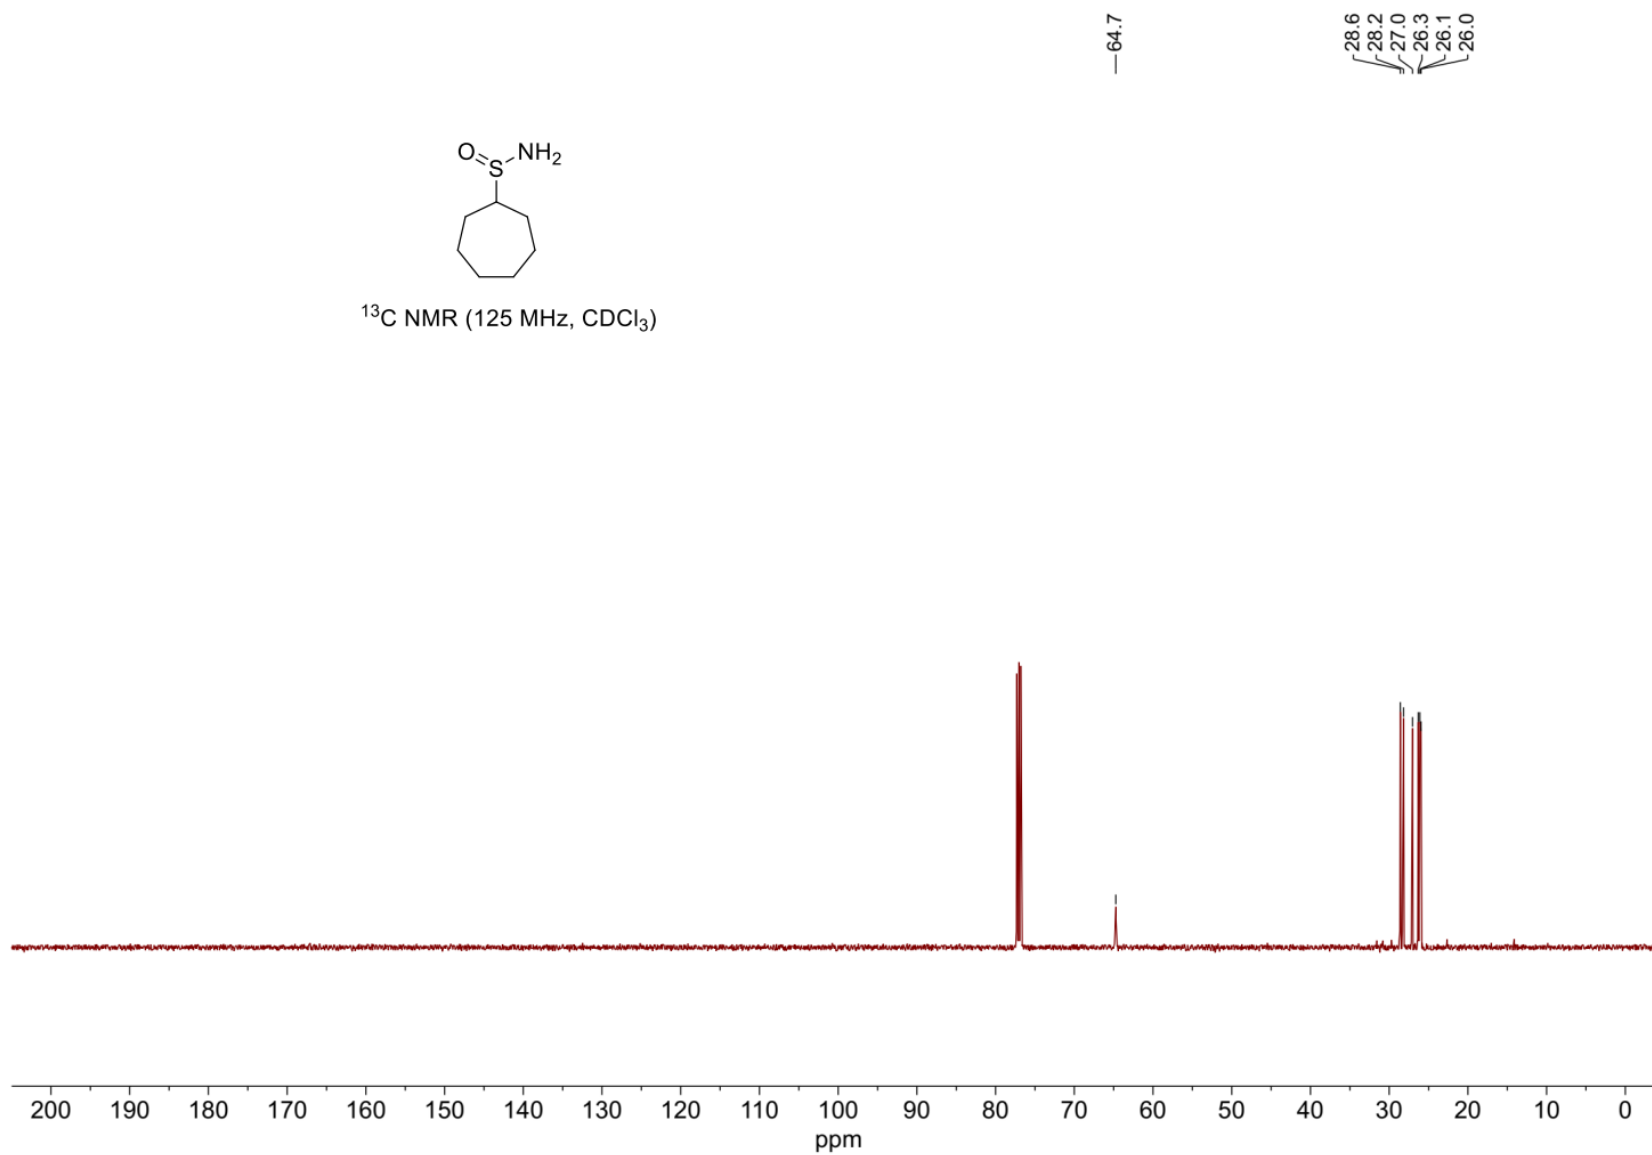

(1*s*,3*R*,5*S*,7*s*)-4-Oxadamantane-1-sulfonamide (6d)

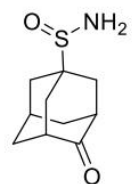

<sup>1</sup>H NMR (500 MHz, CDCl<sub>3</sub>)

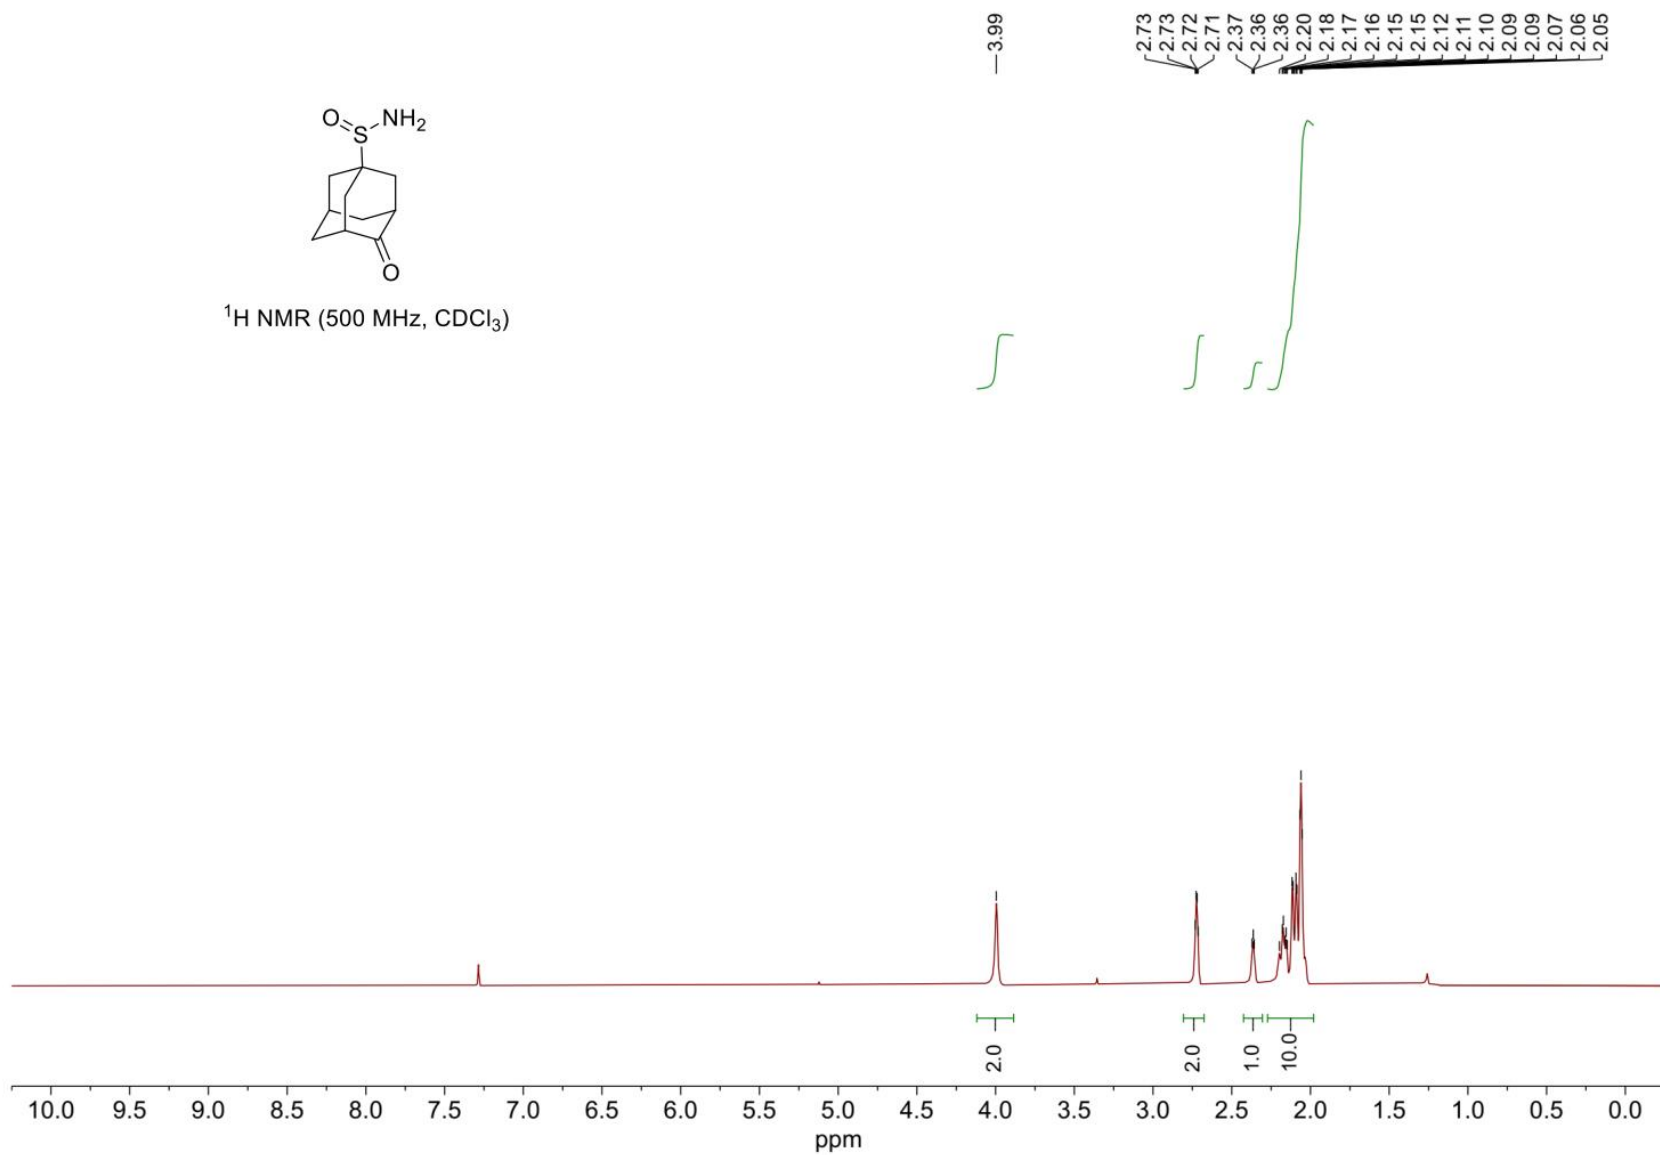

(1*s*,3*R*,5*S*,7*s*)-4-Oxadamantane-1-sulfinamide (6d)

—215.5

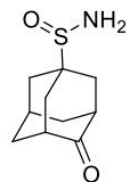

<sup>13</sup>C NMR (125 MHz, CDCl<sub>3</sub>)

—56.0

45.8  
45.8  
38.4  
38.3  
36.2  
35.4  
33.2  
27.8

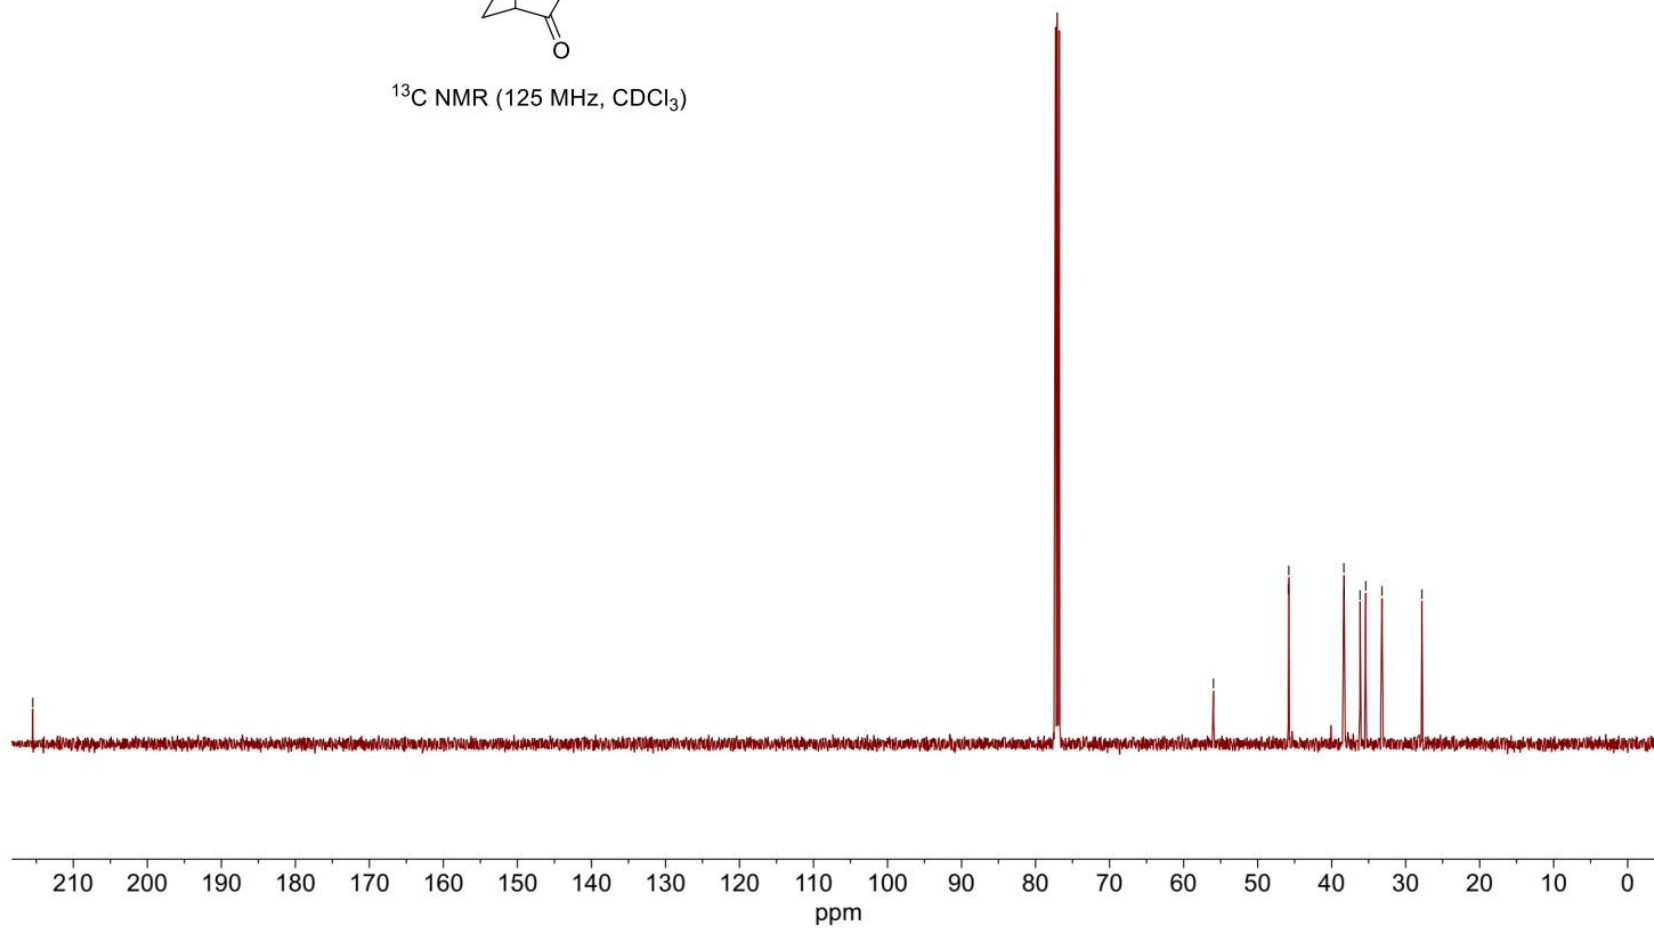

# Methyl 4-(aminosulfinyl)bicyclo[2.2.2]octane-1-carboxylate (6e)

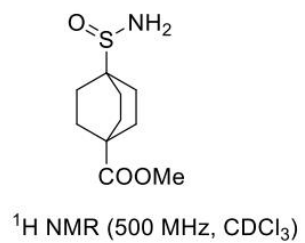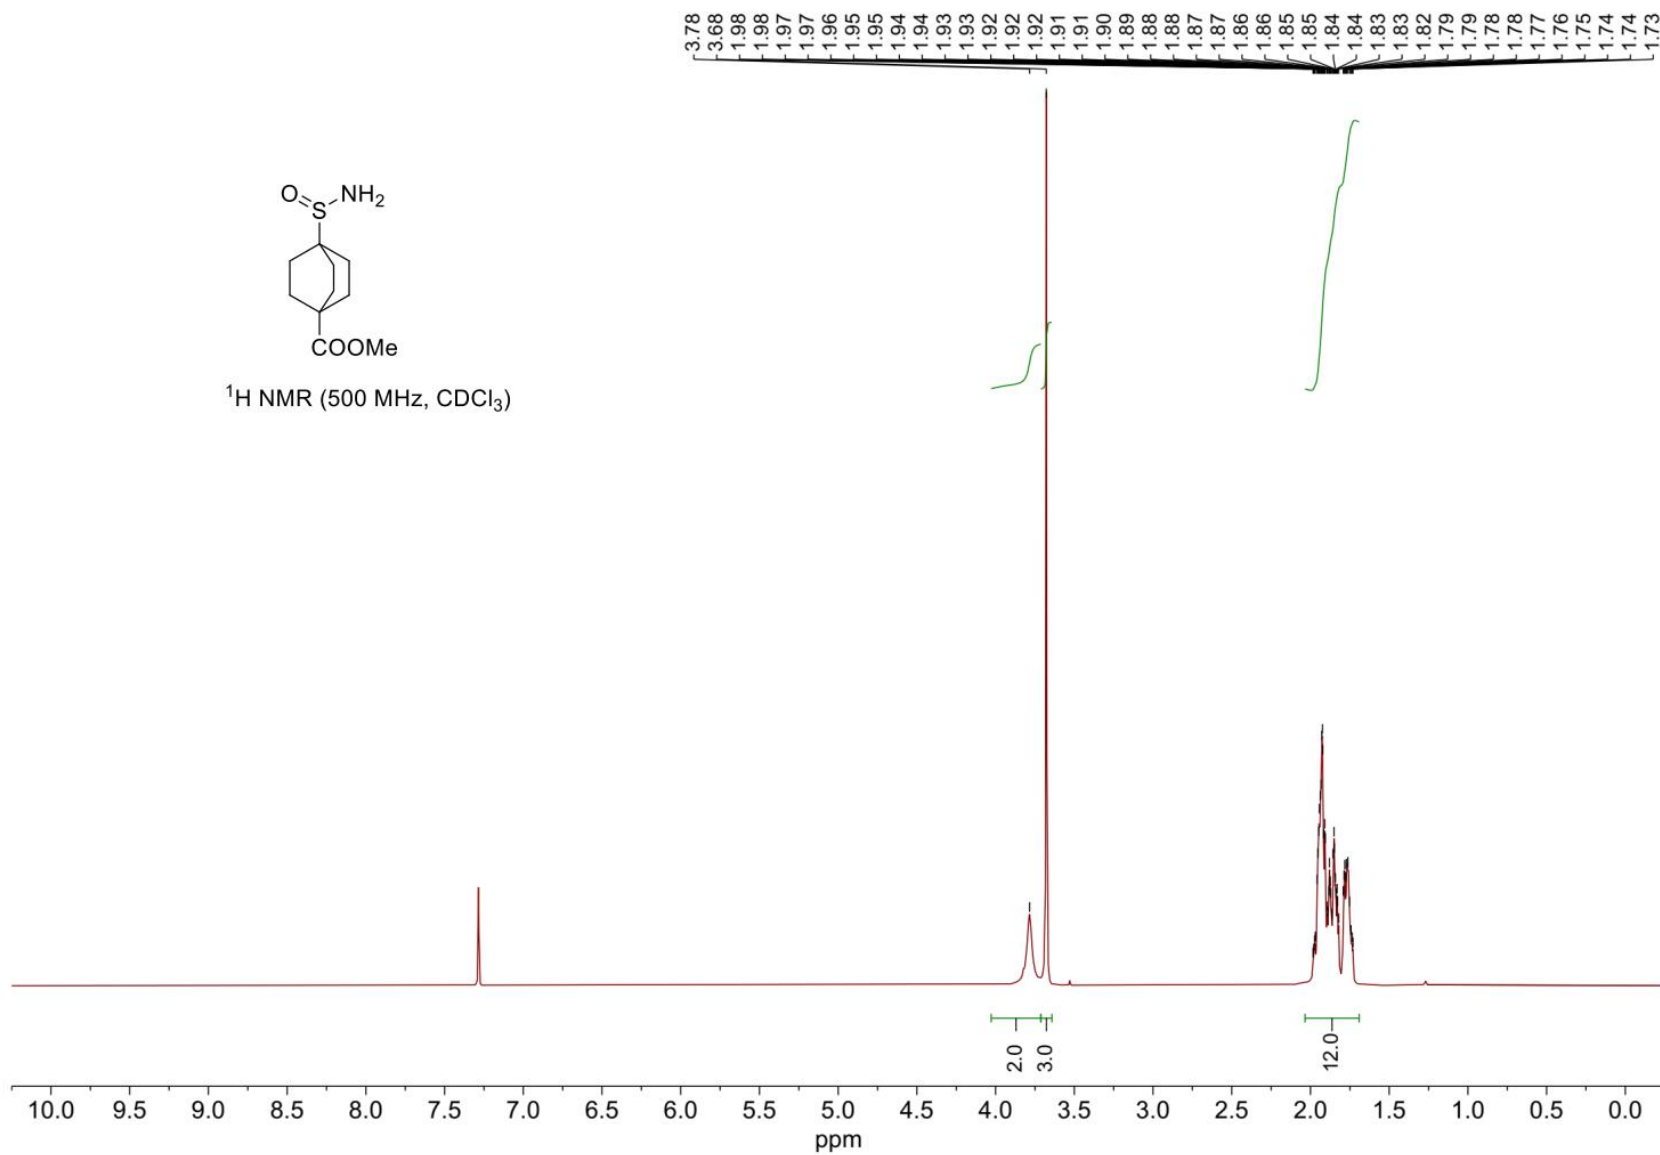

# Methyl 4-(aminosulfinyl)bicyclo[2.2.2]octane-1-carboxylate (6e)

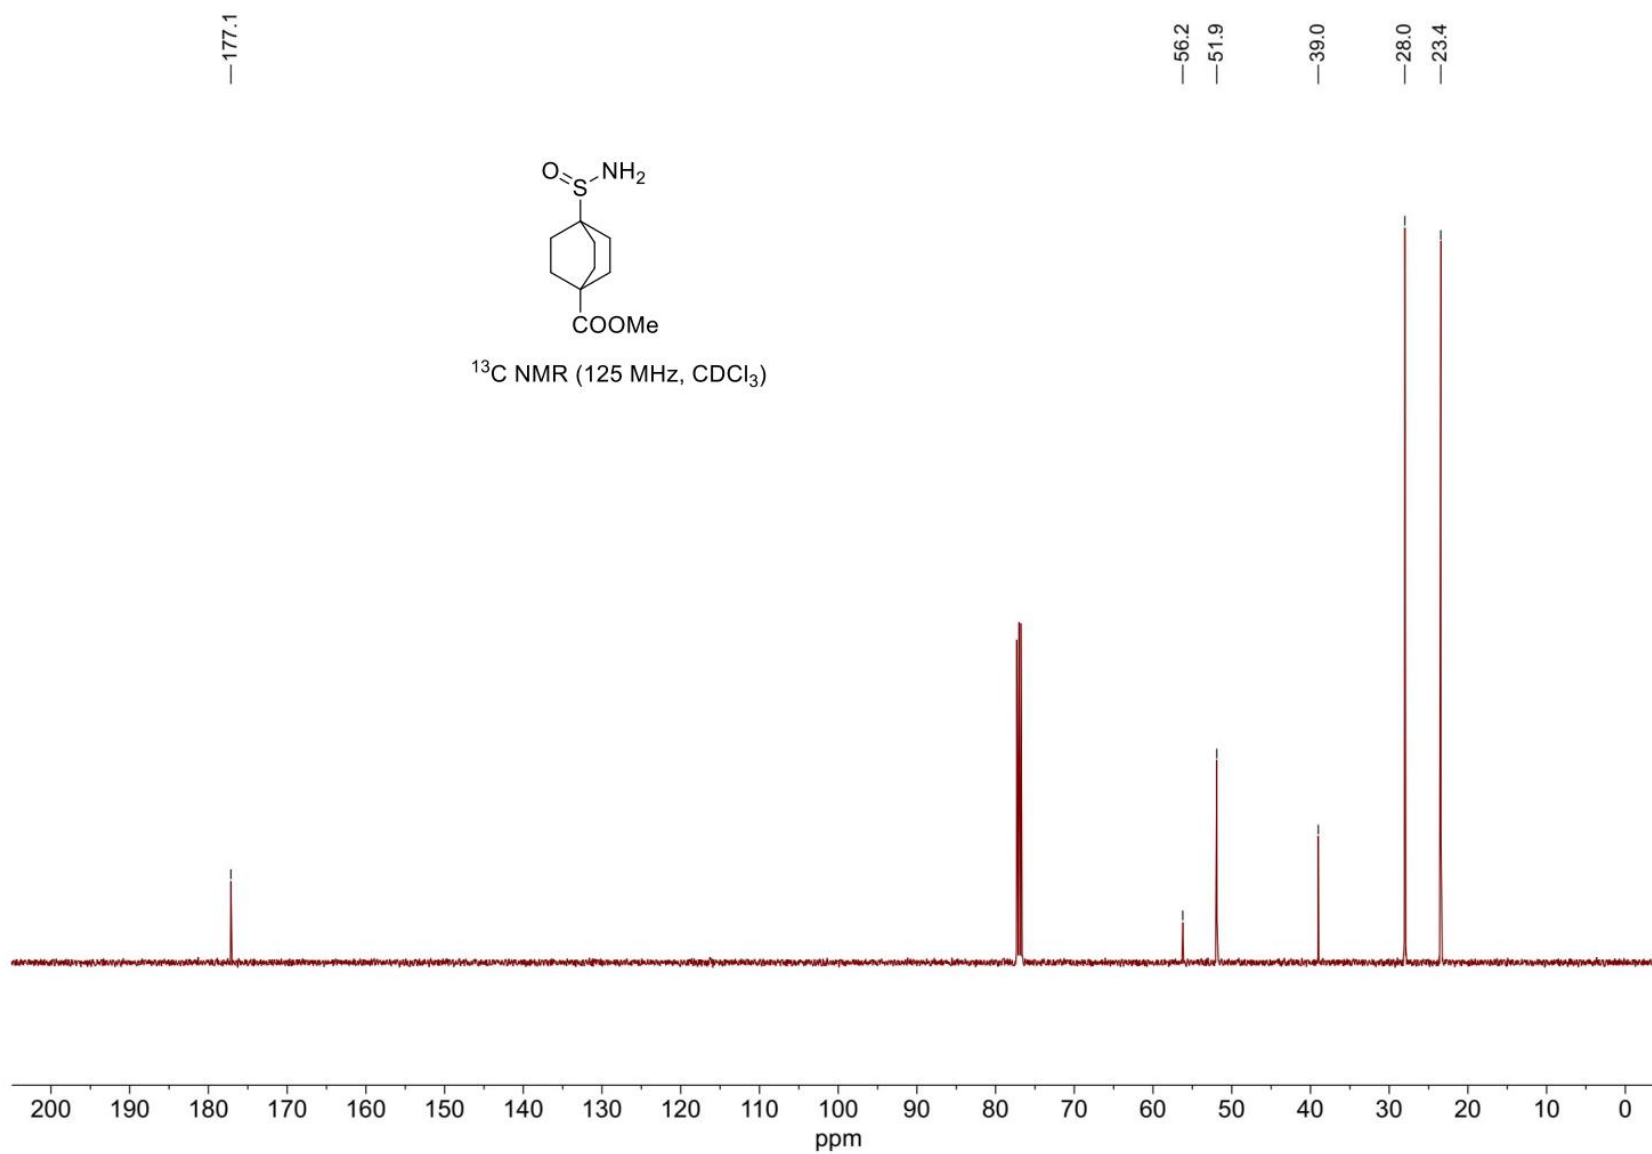

# 5-(2,5-Dimethylphenoxy)-2-methylpentane-2-sulfonamide (6f)

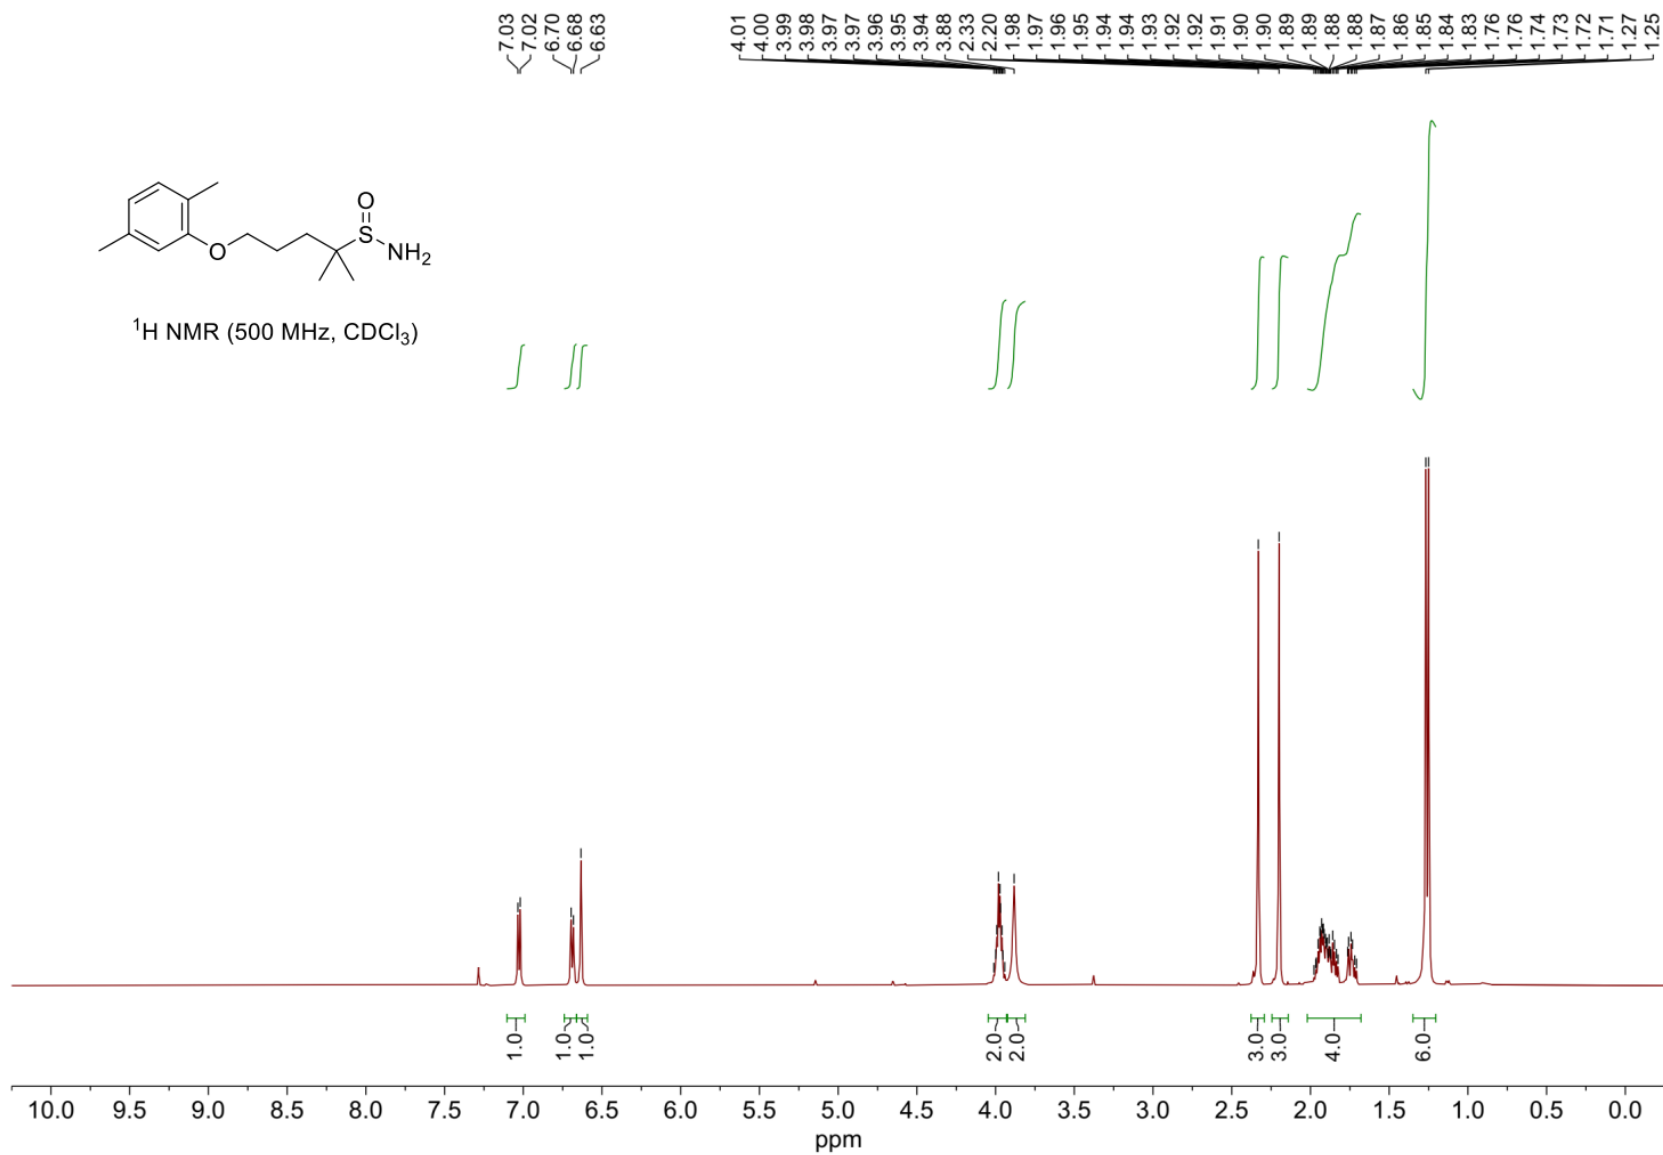

### 5-(2,5-Dimethylphenoxy)-2-methylpentane-2-sulfonamide (6f)

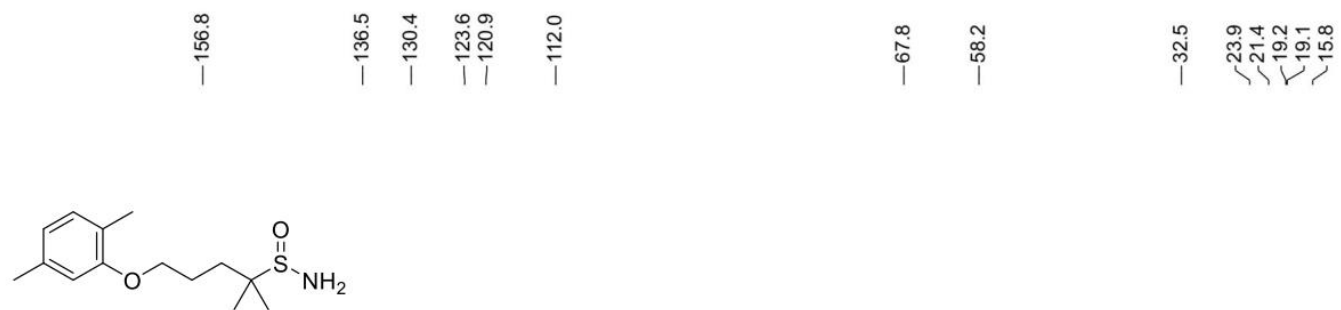

$^{13}\text{C}$  NMR (125 MHz,  $\text{CDCl}_3$ )

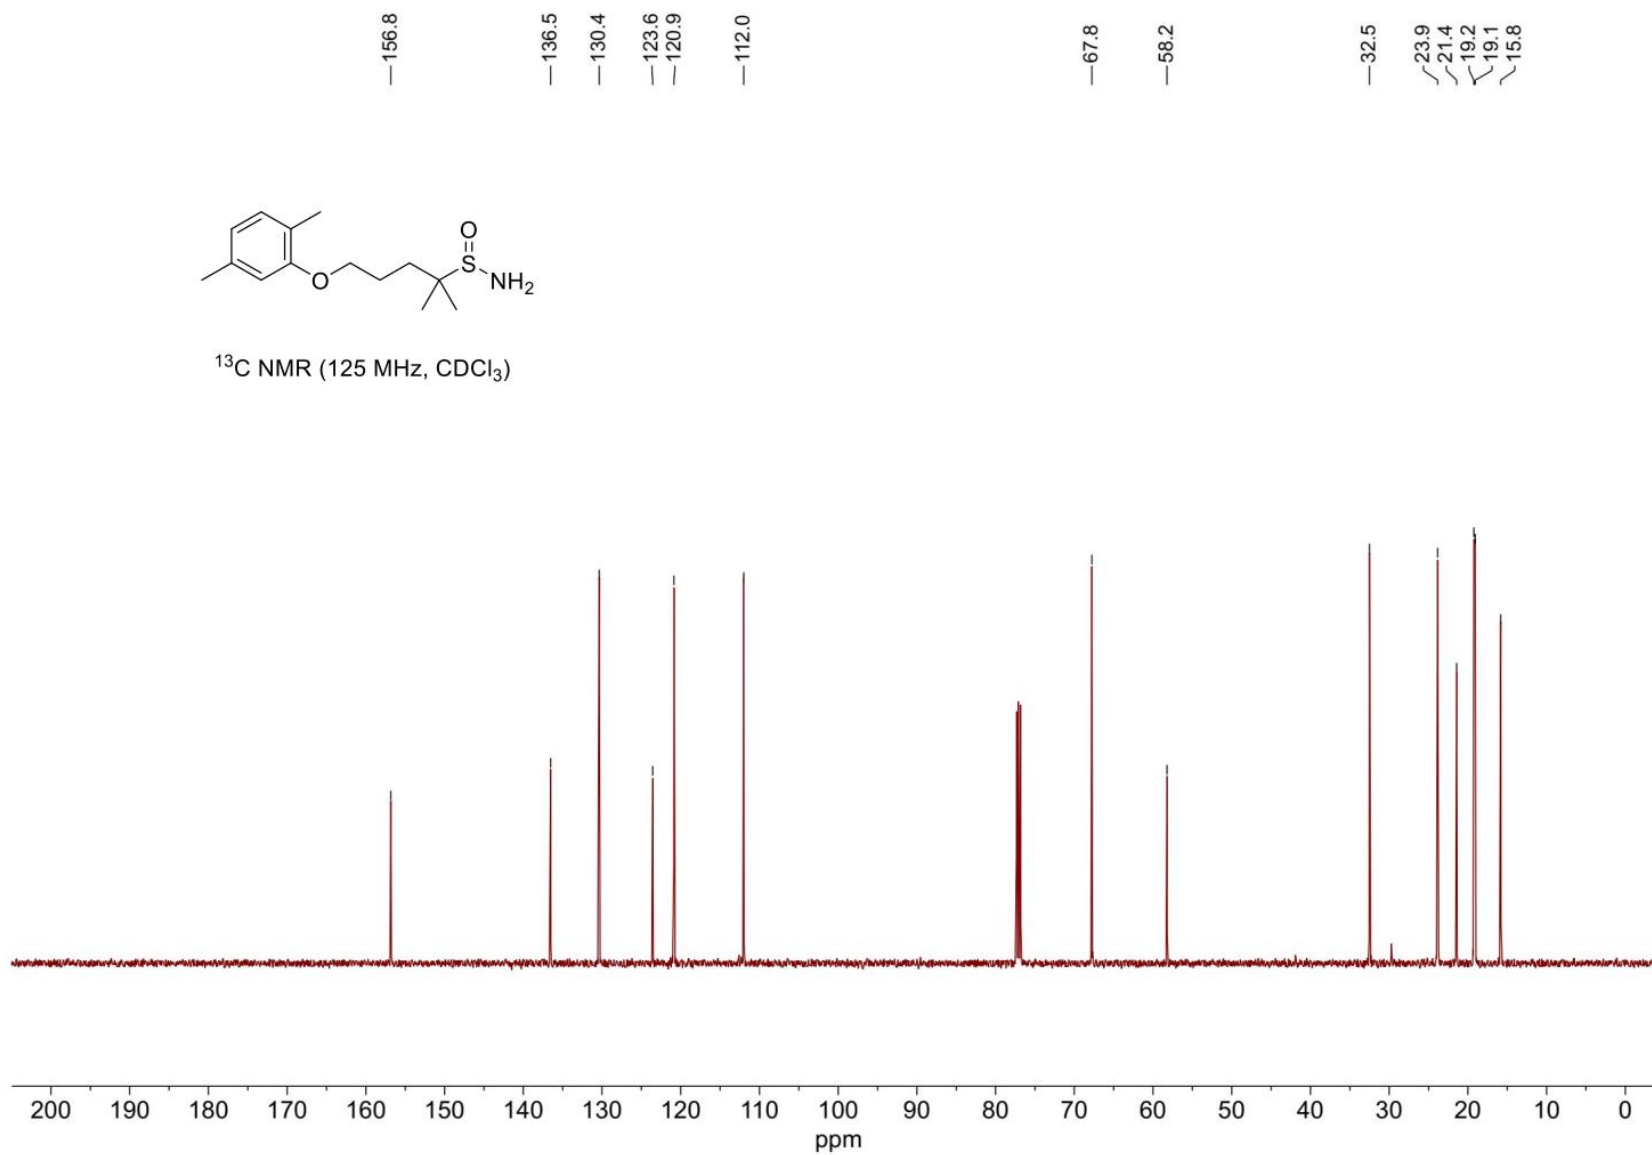

### 5-(2,5-Dimethylphenoxy)-2-methyl-N-phenylpentane-2-sulfonamide (7a)

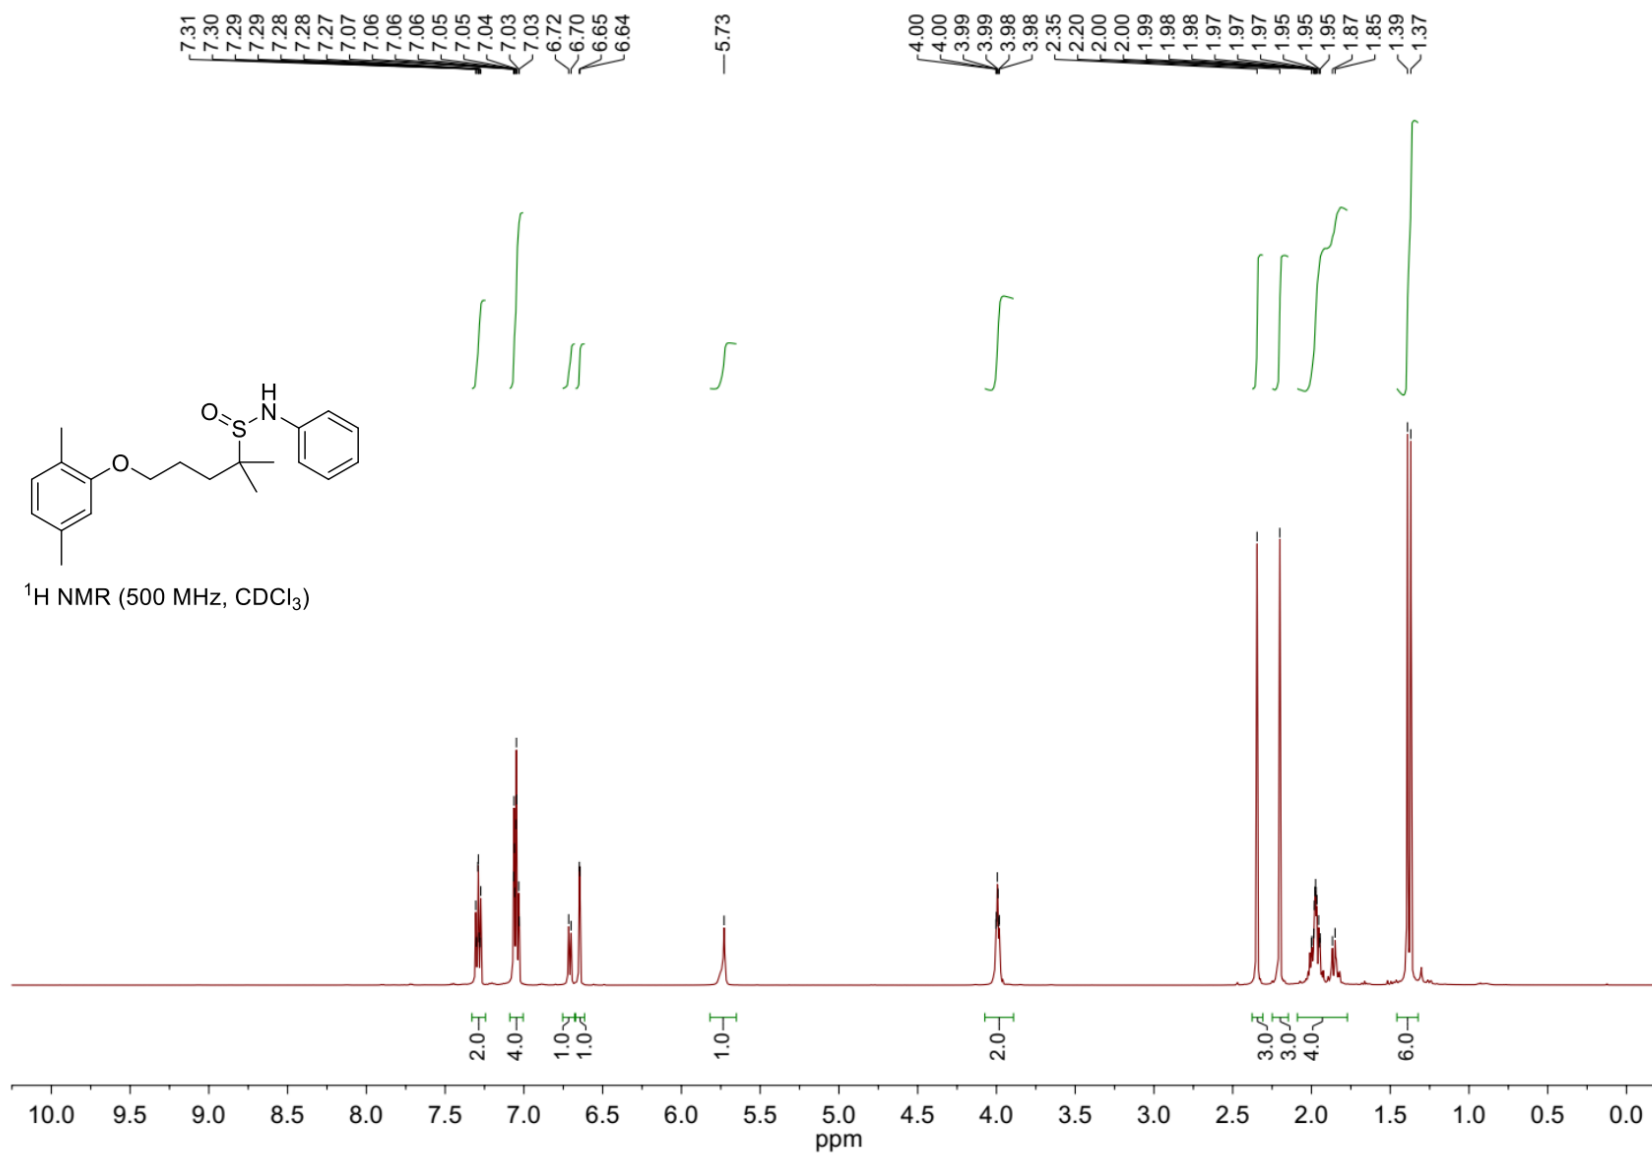



# 5-(2,5-Dimethylphenoxy)-2-methyl-N-phenylpentane-2-sulfonamide (7a)

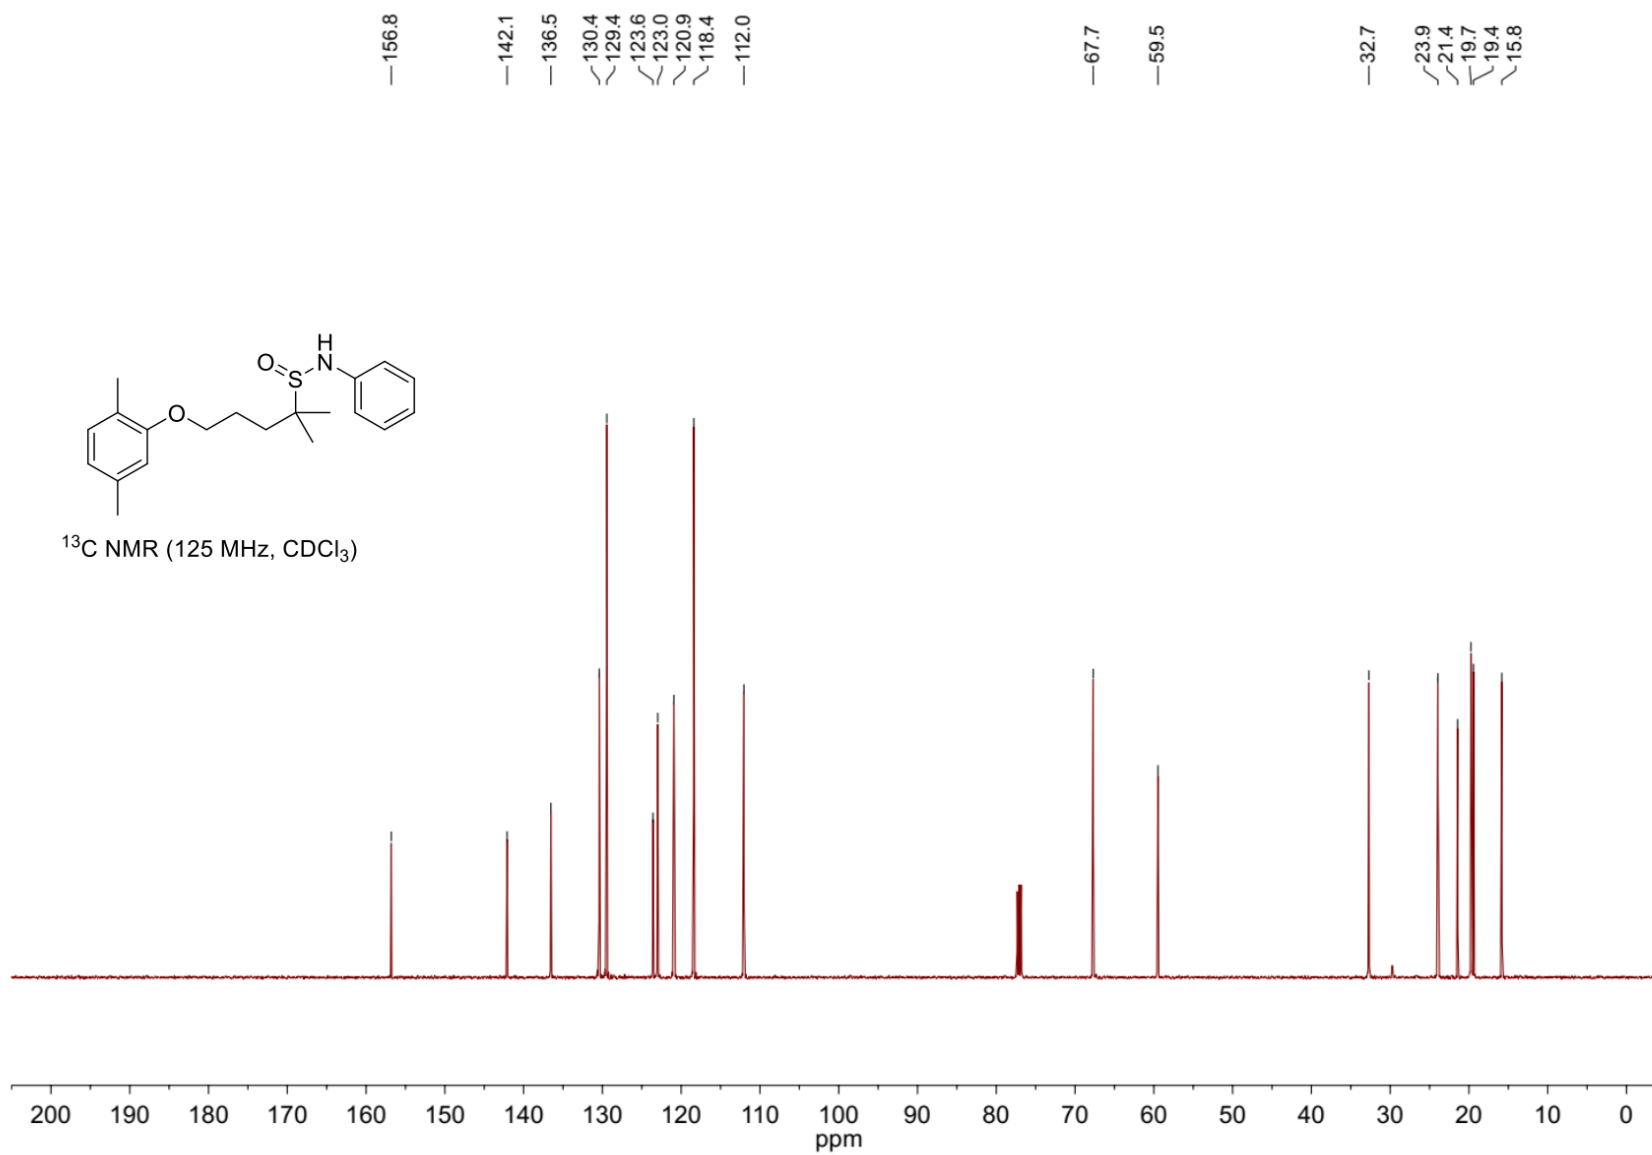

(E)-5-(4-Hydroxy-6-methoxy-7-methyl-3-oxo-1,3-dihydroisobenzofuran-5-yl)-3-methyl-N-phenylpent-3-ene-1-sulfonamide (7b)

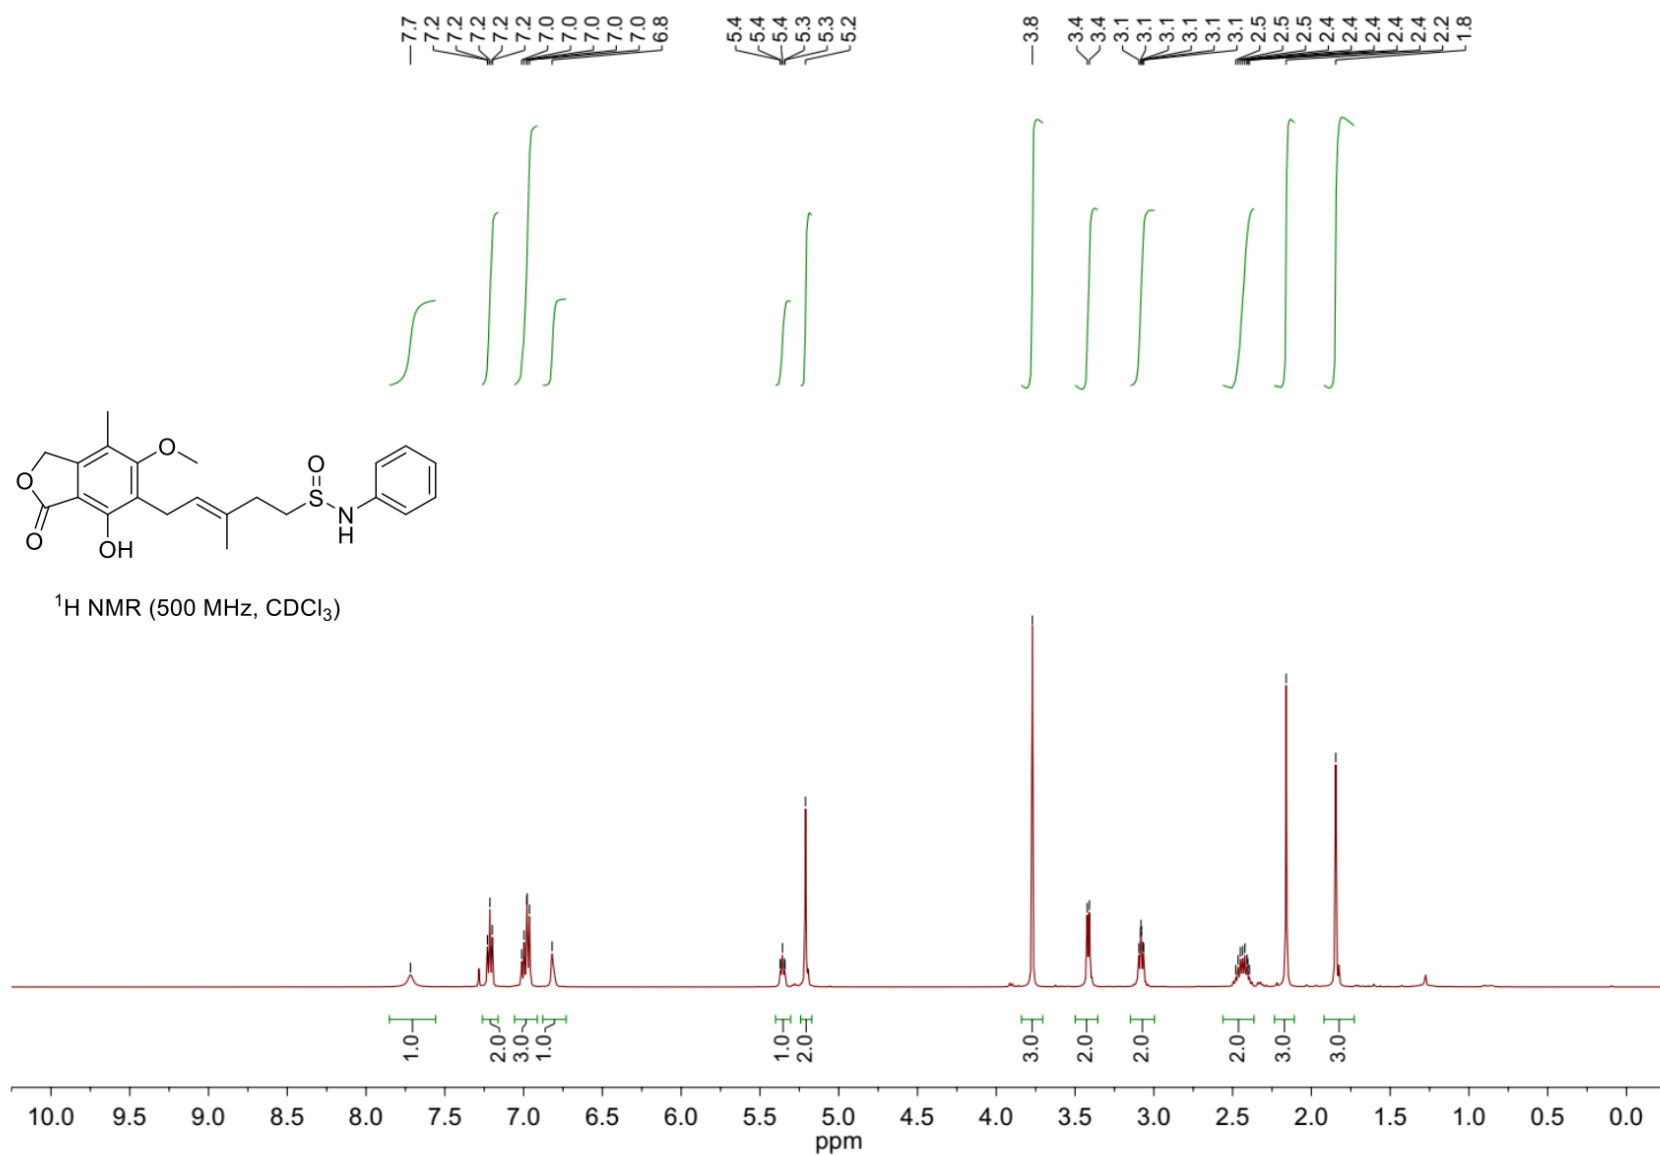

**(E)-5-(4-Hydroxy-6-methoxy-7-methyl-3-oxo-1,3-dihydroisobenzofuran-5-yl)-3-methyl-N-phenylpent-3-ene-1-sulfonamide (7b)**

—172.9 —163.6 —153.6 —144.2 —141.2 —132.4 —129.4 —124.5 —123.1 —121.7 —118.5 —116.8 —106.4 —70.1 —61.0 —54.1 —32.8 —22.6 —16.2 —11.6

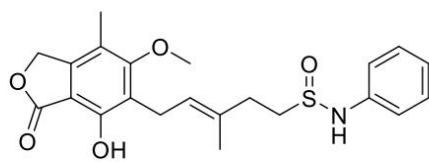

<sup>13</sup>C NMR (125 MHz, CDCl<sub>3</sub>)

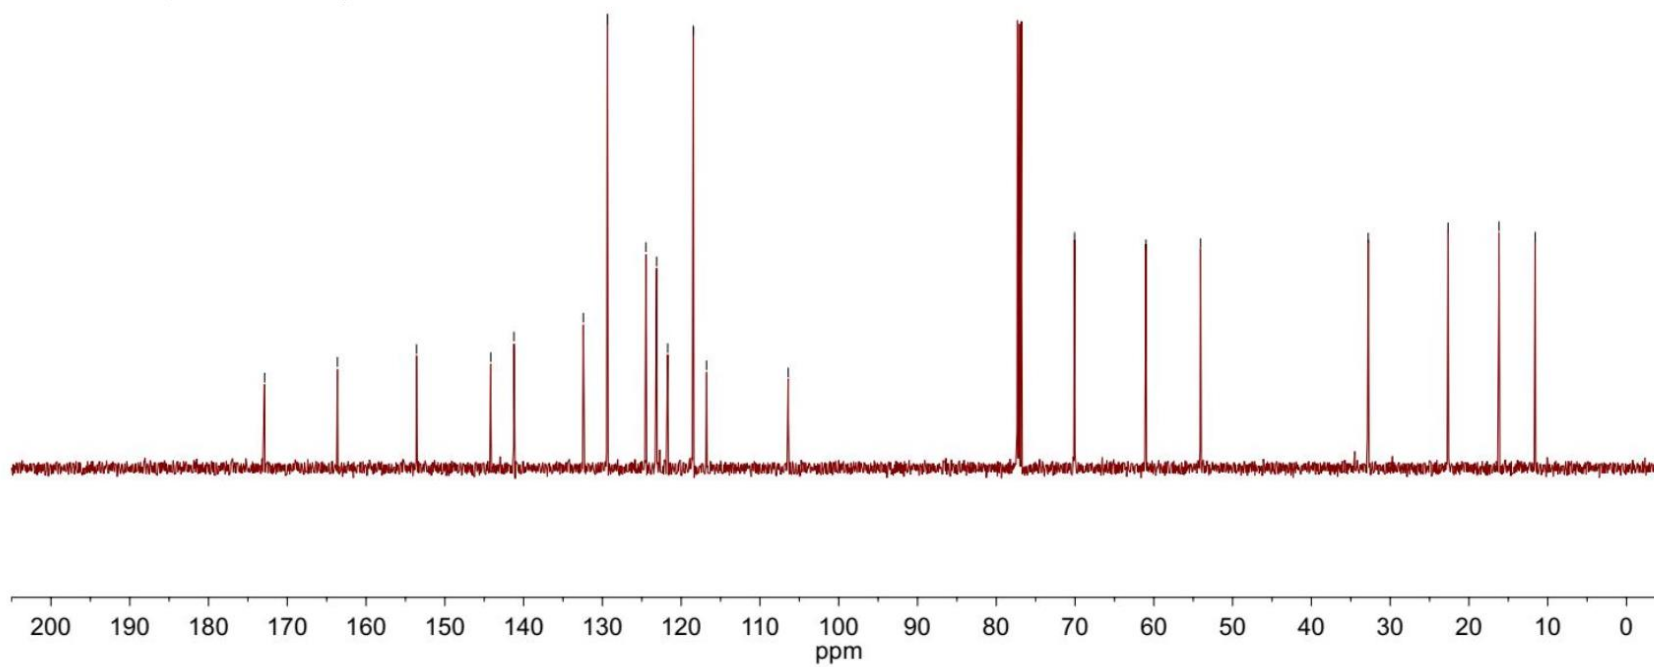

Tert-butyl 2-((phenylamino)sulfinyl)pyrrolidine-1-carboxylate (7c)

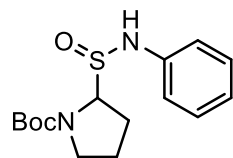

$^{13}\text{C}$  NMR (125 MHz,  $\text{CD}_3\text{OD}$ )

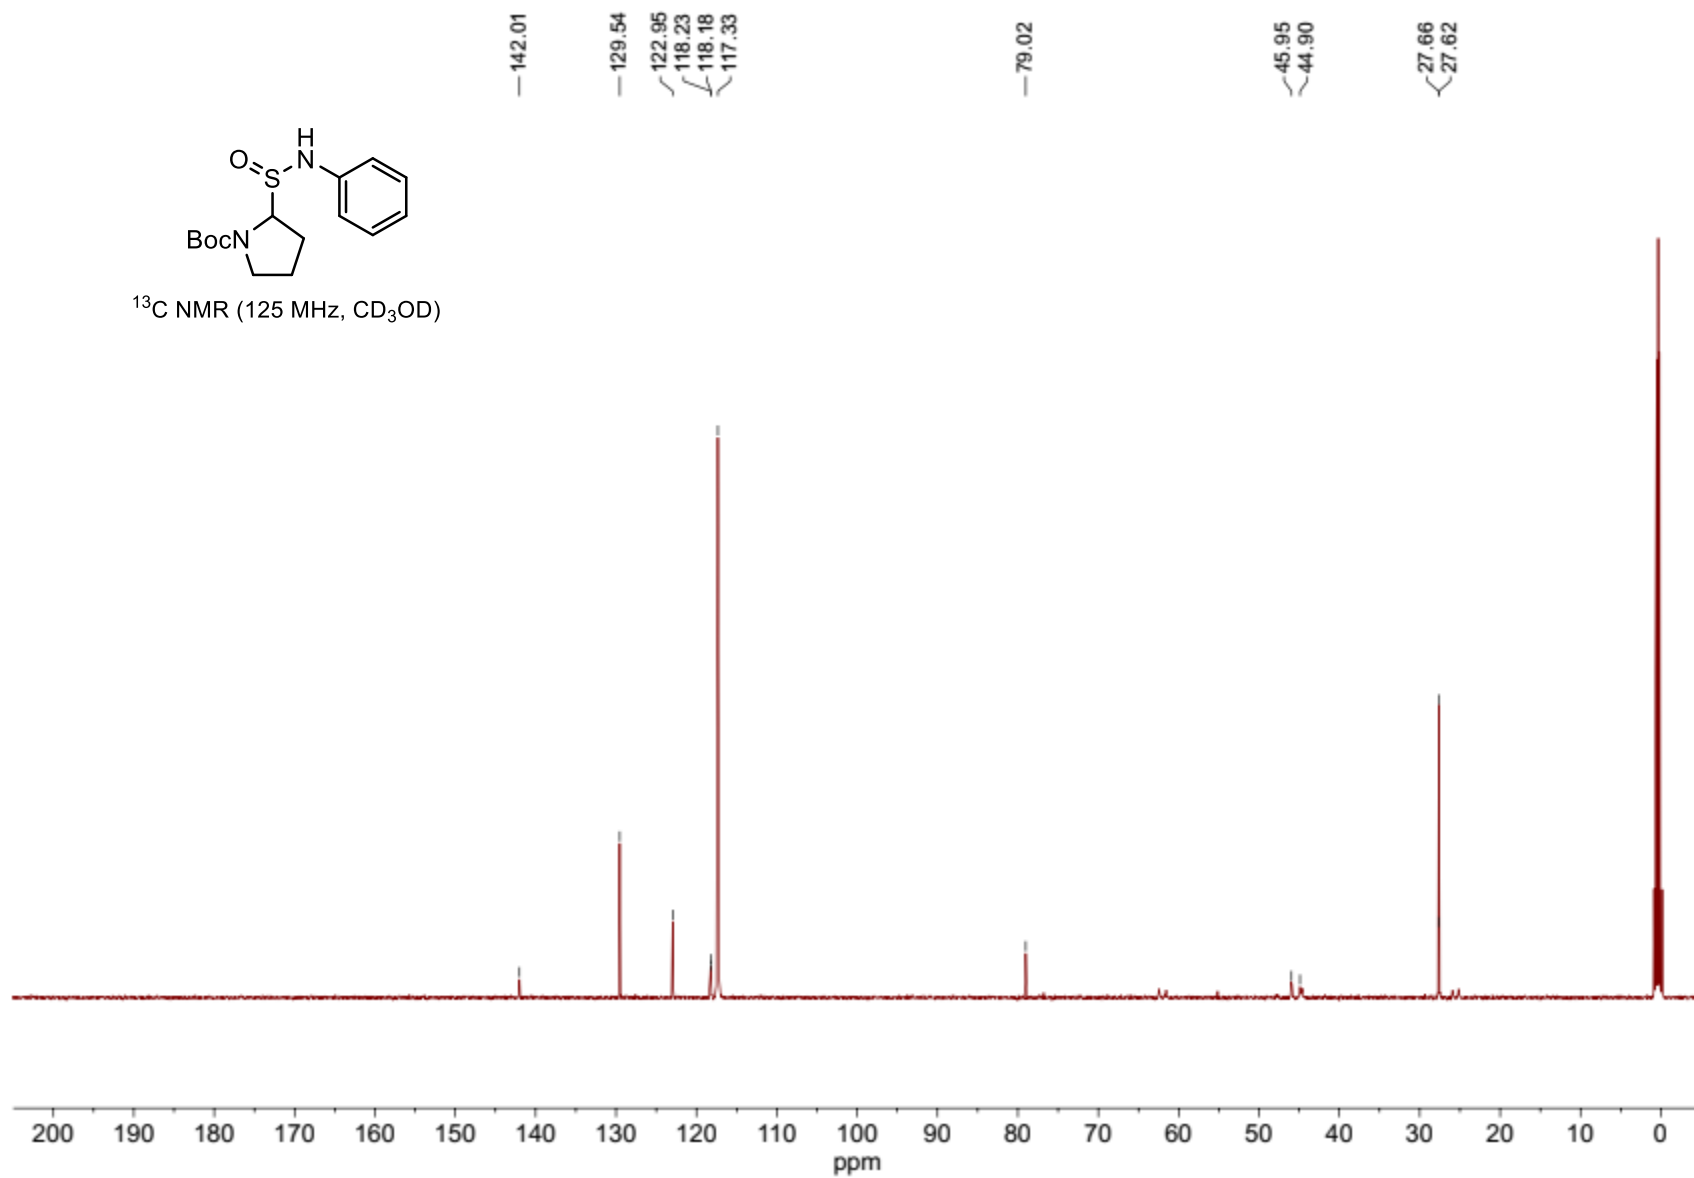

Tert-butyl 2-((phenylamino)sulfinyl)pyrrolidine-1-carboxylate (7c)

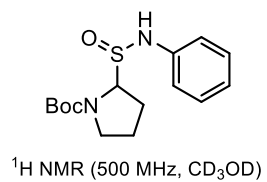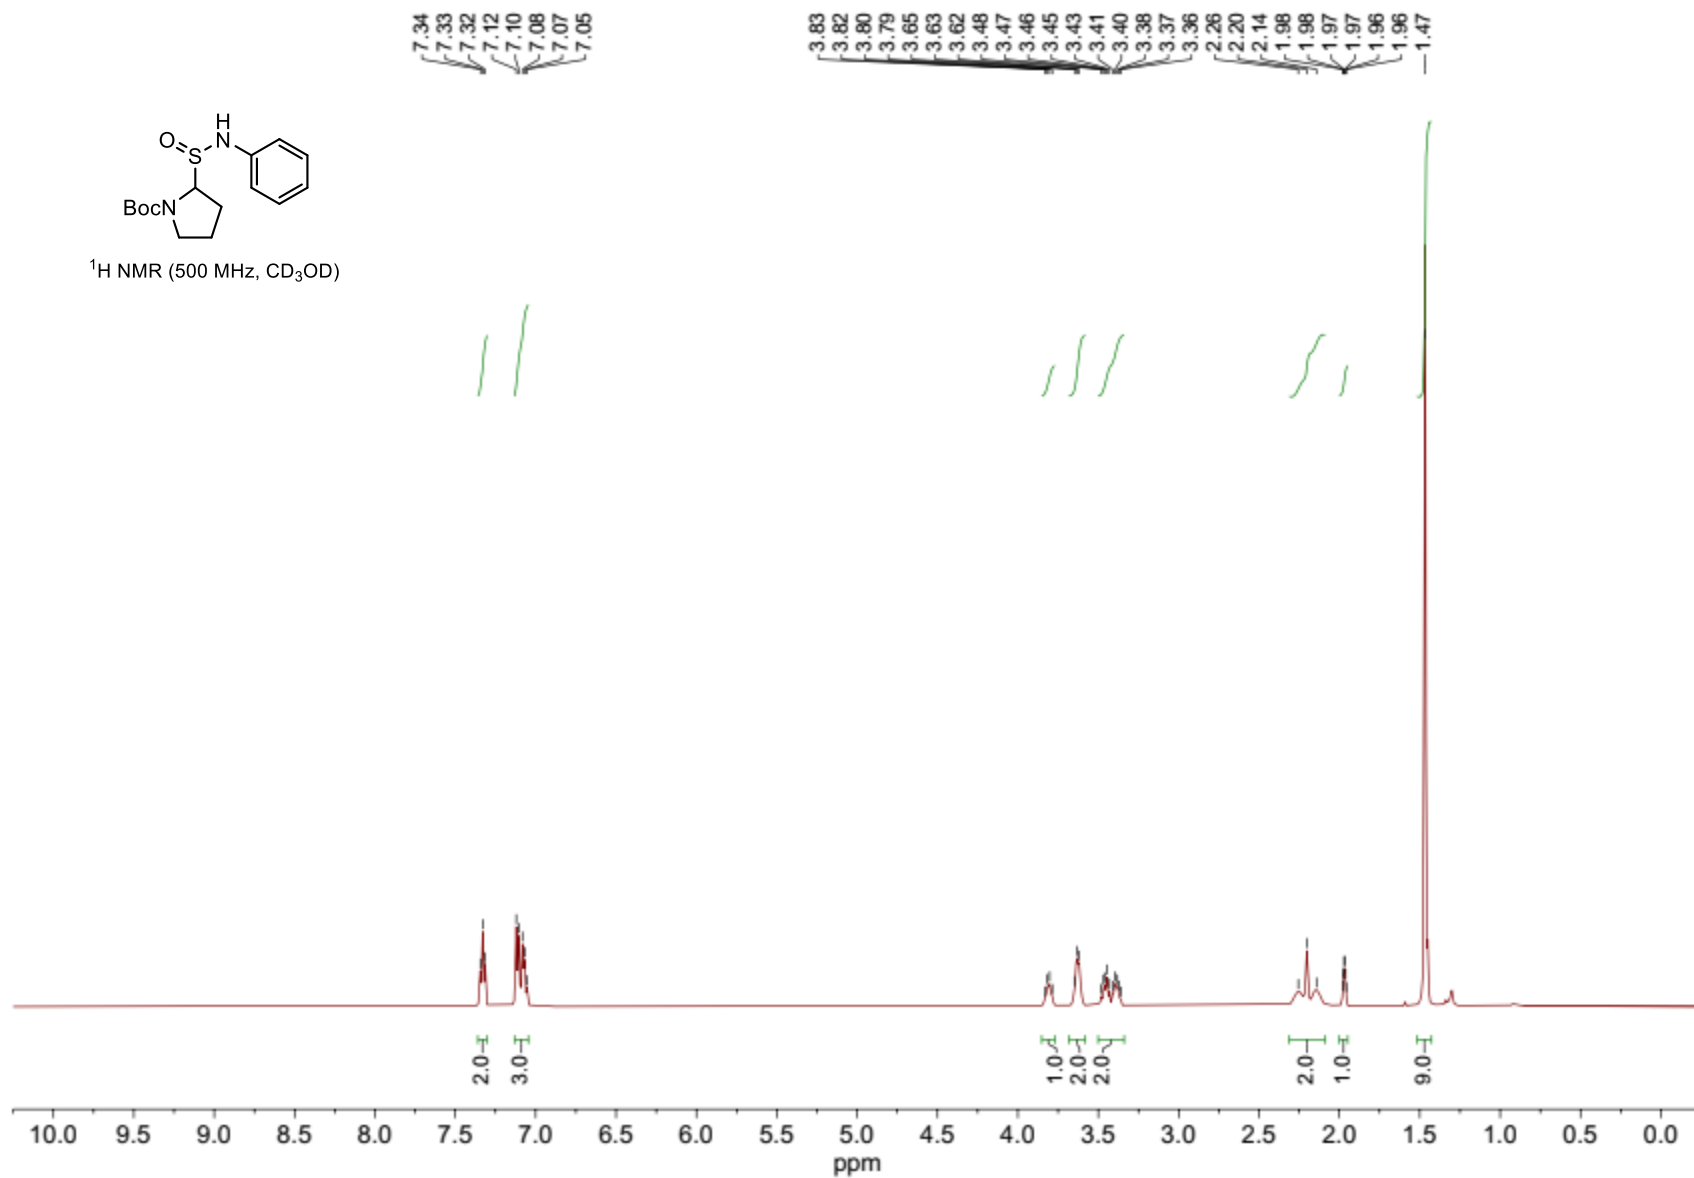

Tert-butyl 2-((phenylamino)sulfinyl)pyrrolidine-1-carboxylate (7c)

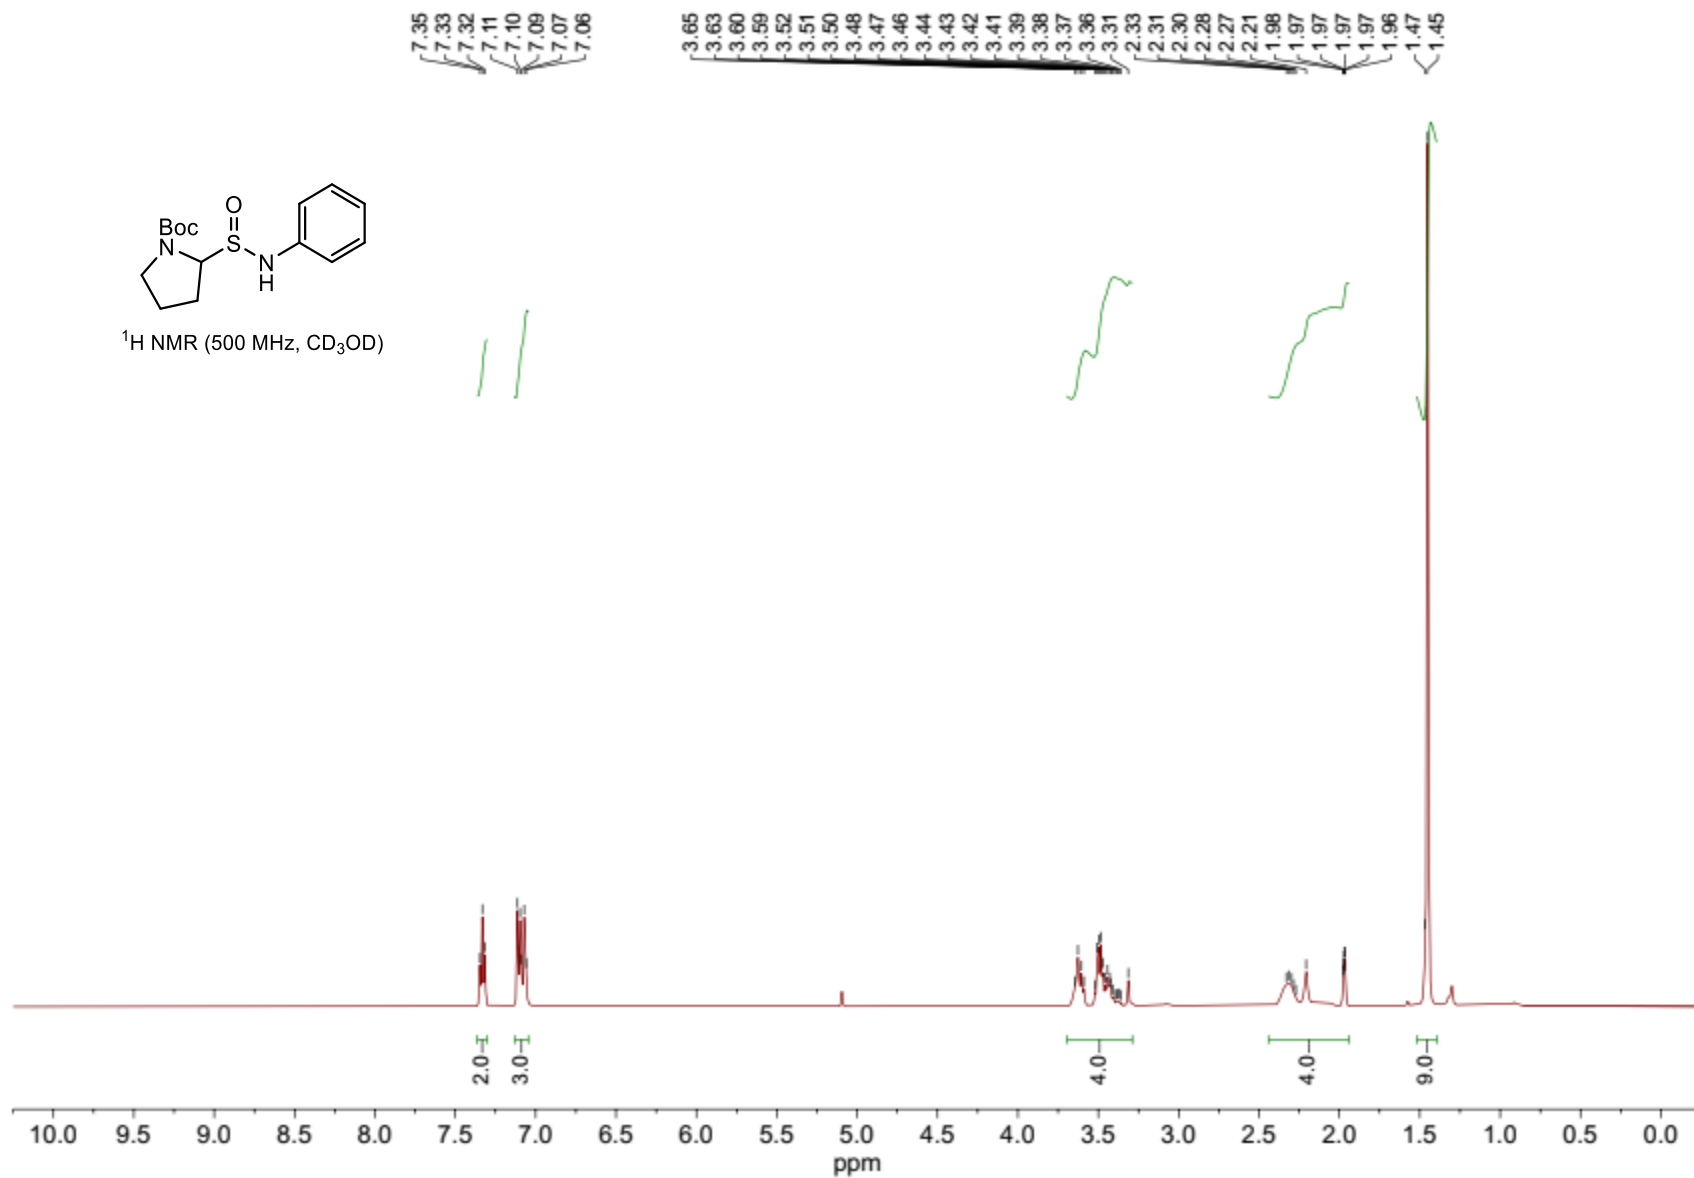

Tert-butyl 2-((phenylamino)sulfinyl)pyrrolidine-1-carboxylate (7c)

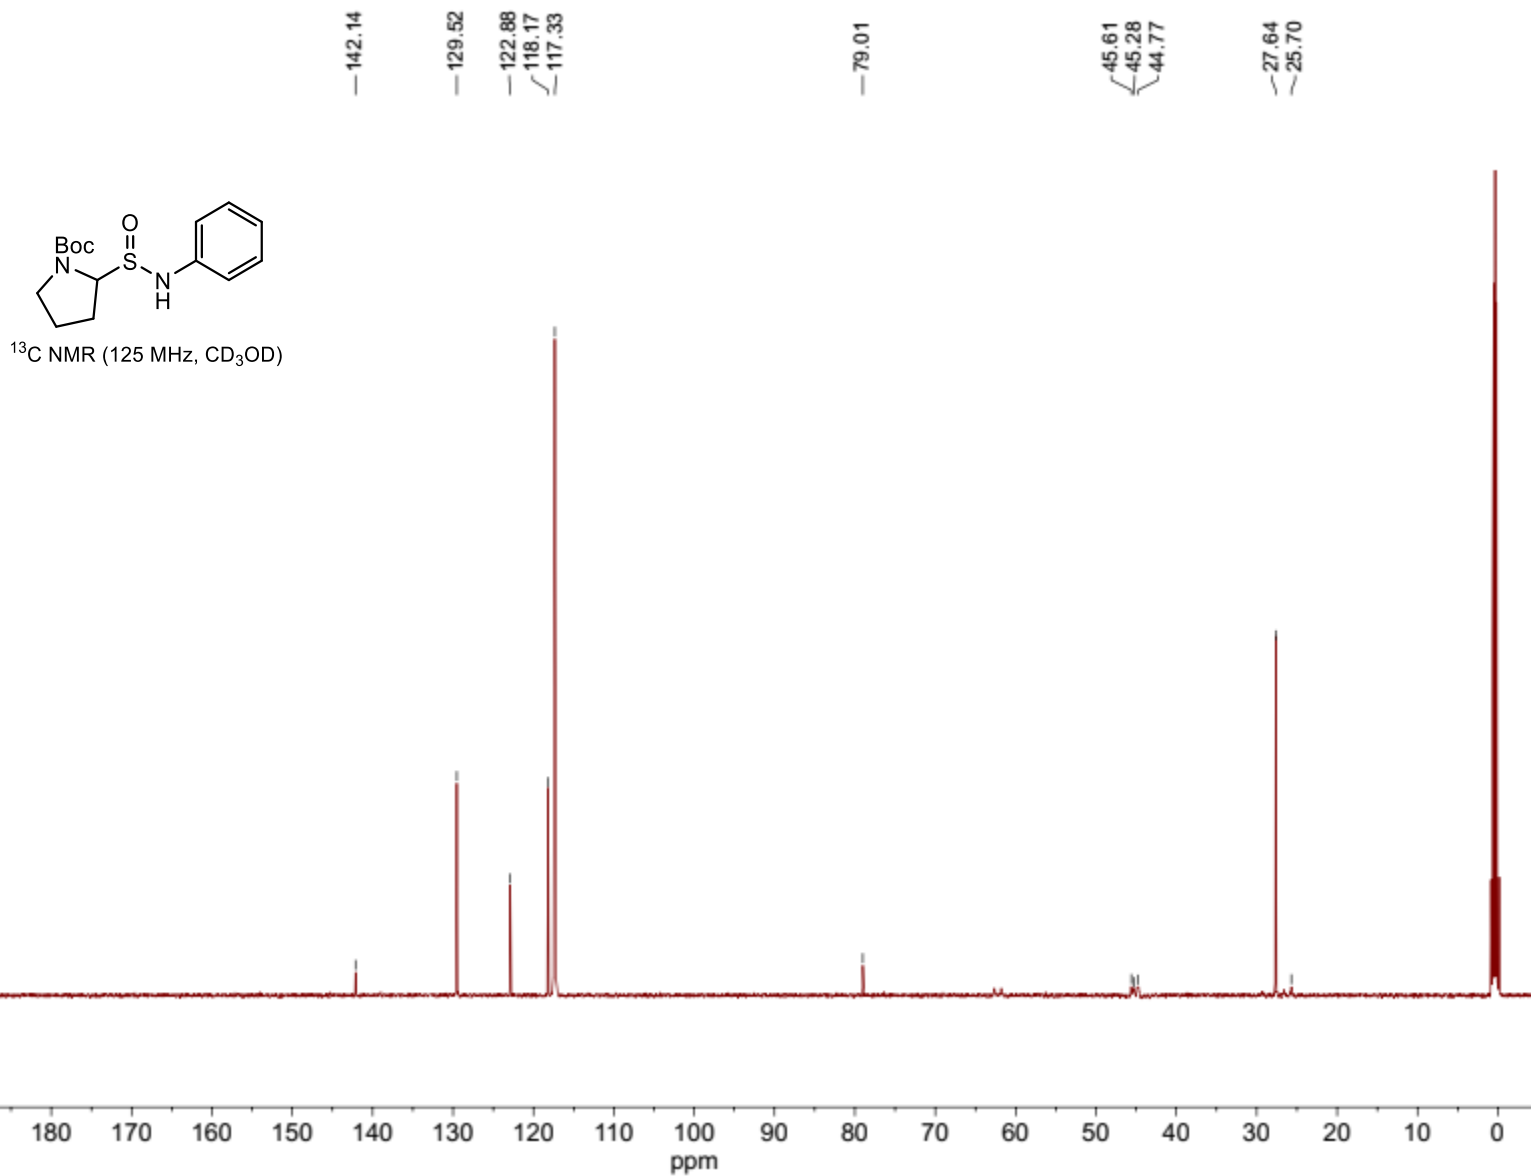

***tert*-Butyl (*tert*-butoxycarbonyl)((phenylamino)sulfinyl)alaninate (7d)**

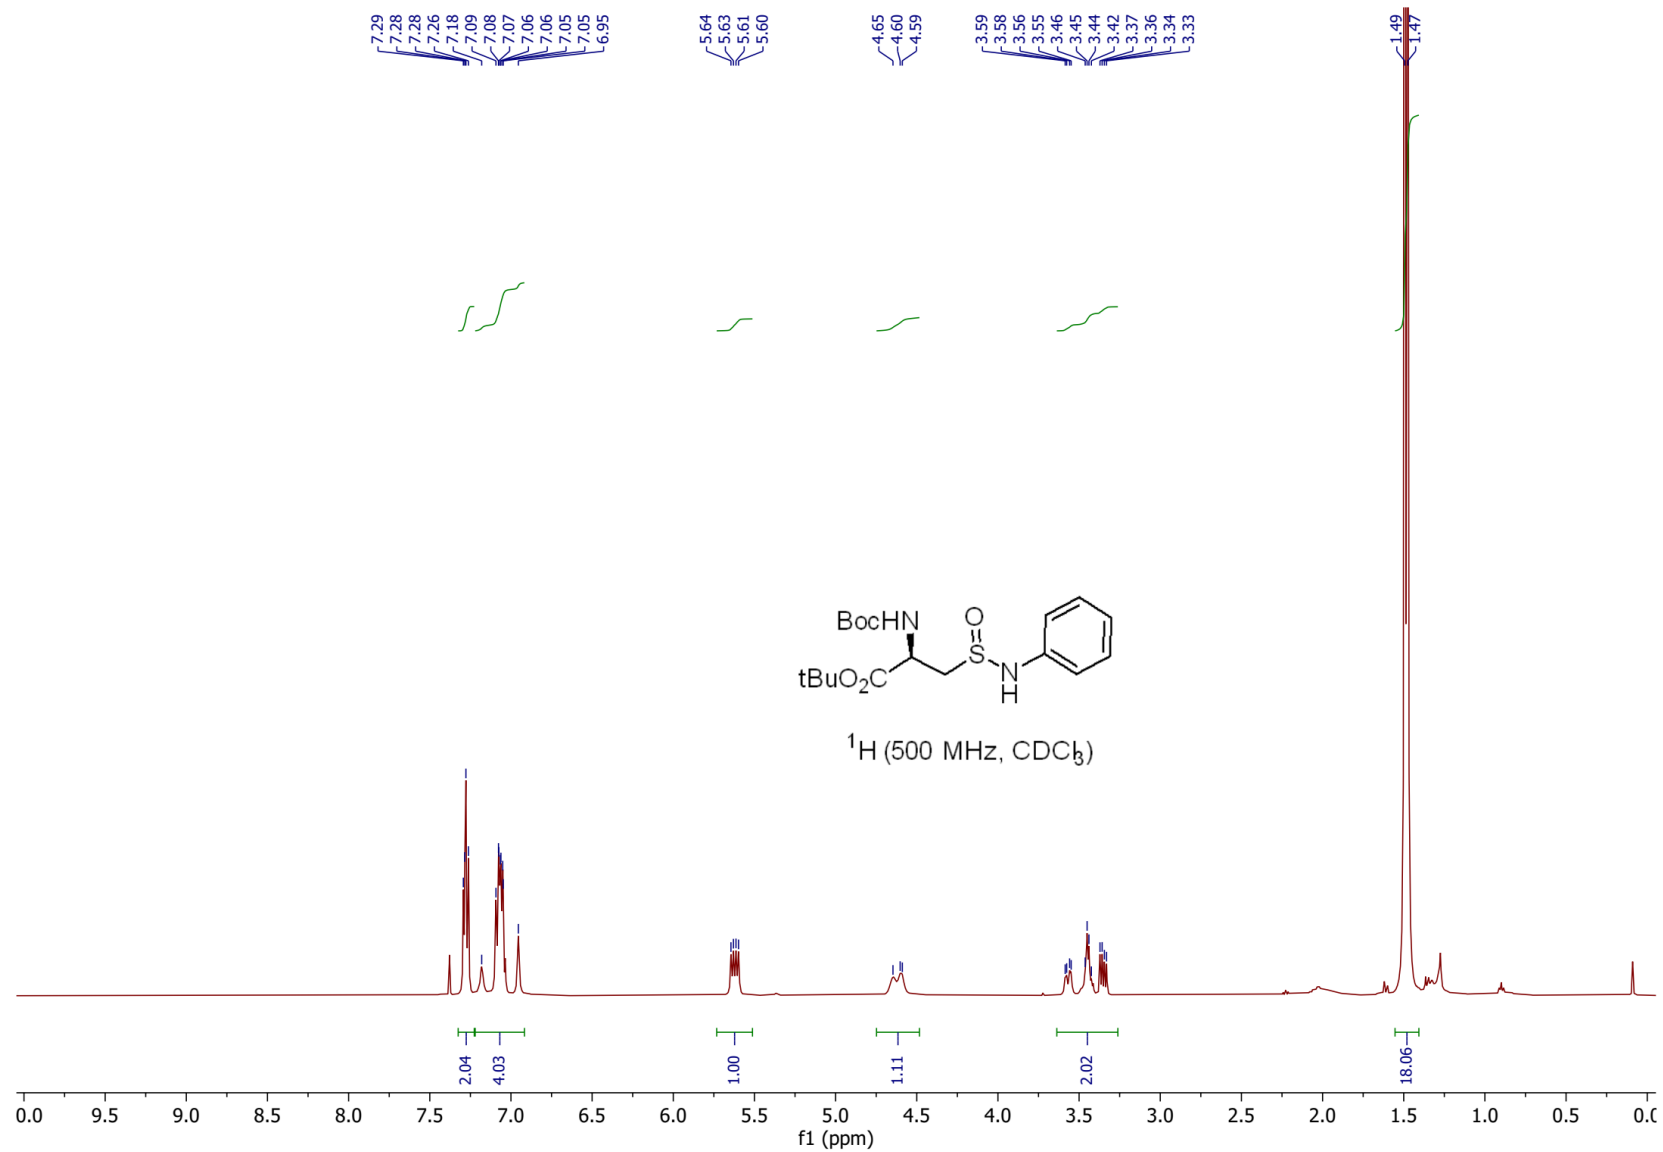



*tert*-Butyl (*tert*-butoxycarbonyl)((phenylamino)sulfinyl)alaninate (7d)

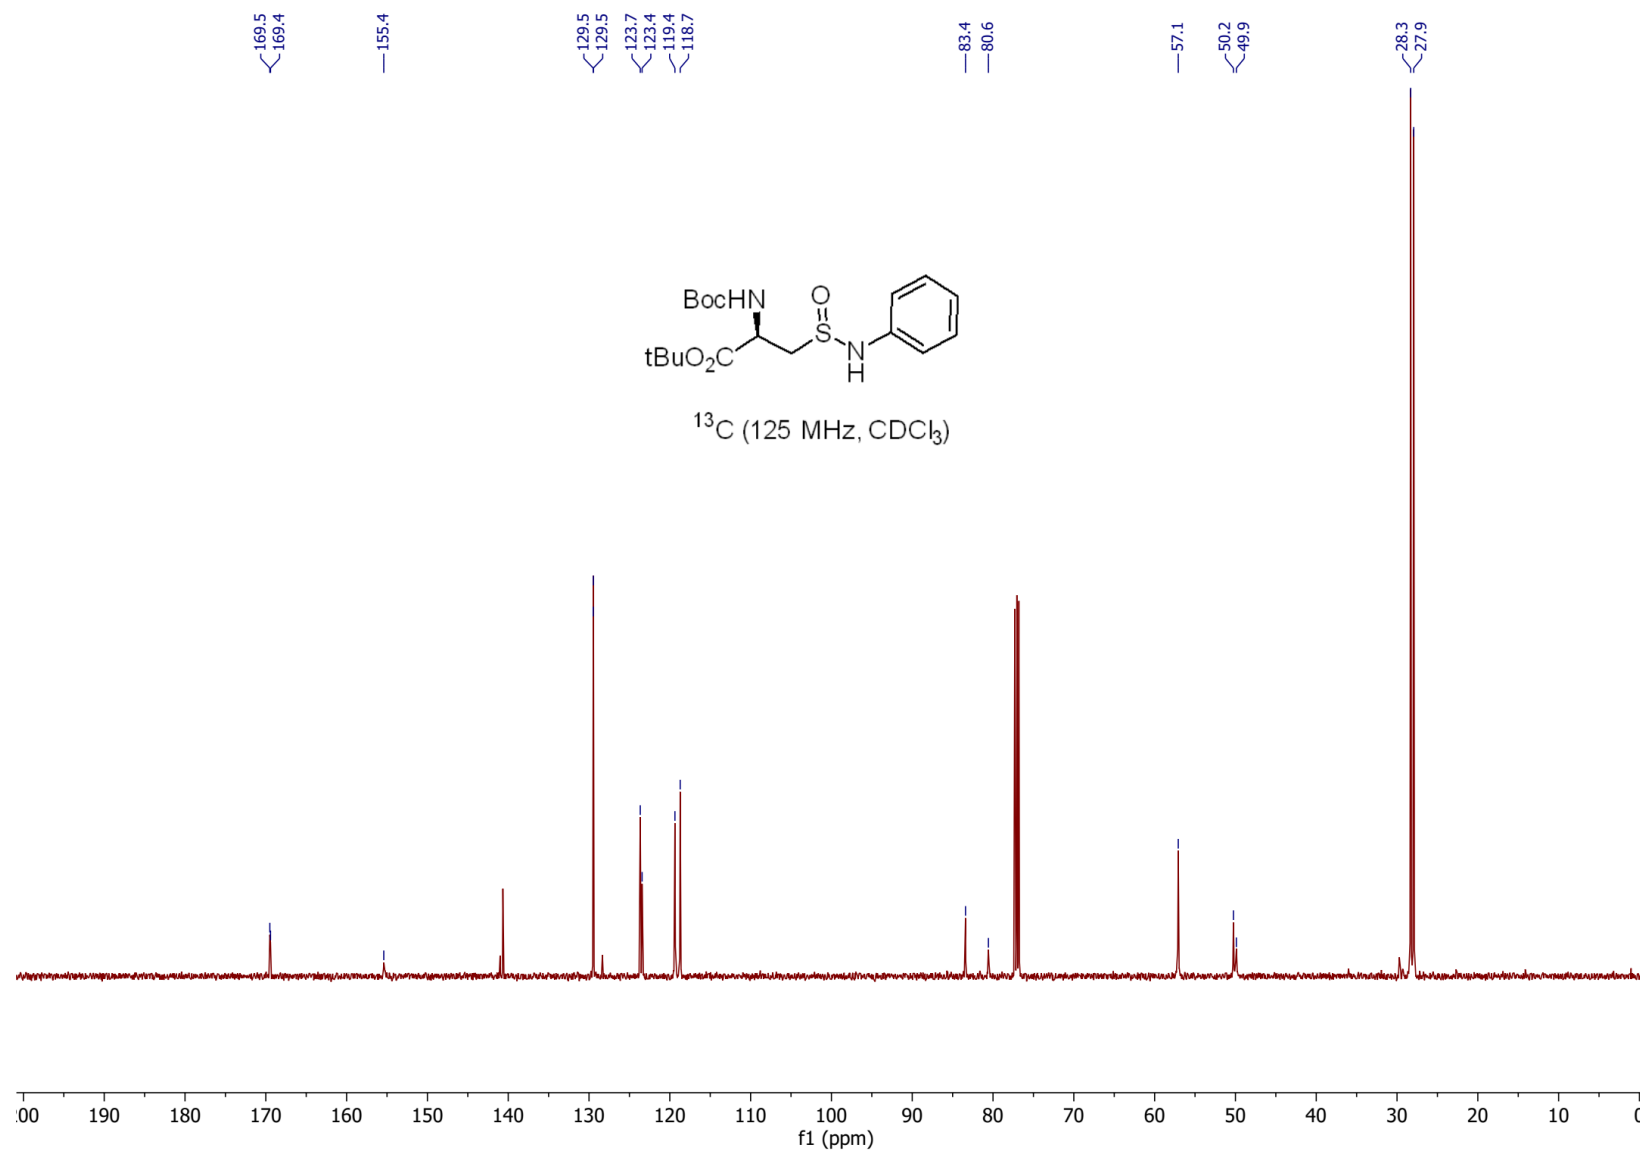

2-(4,5-Diphenyloxazol-2-yl)-N-phenylethane-1-sulfonamide (7e)

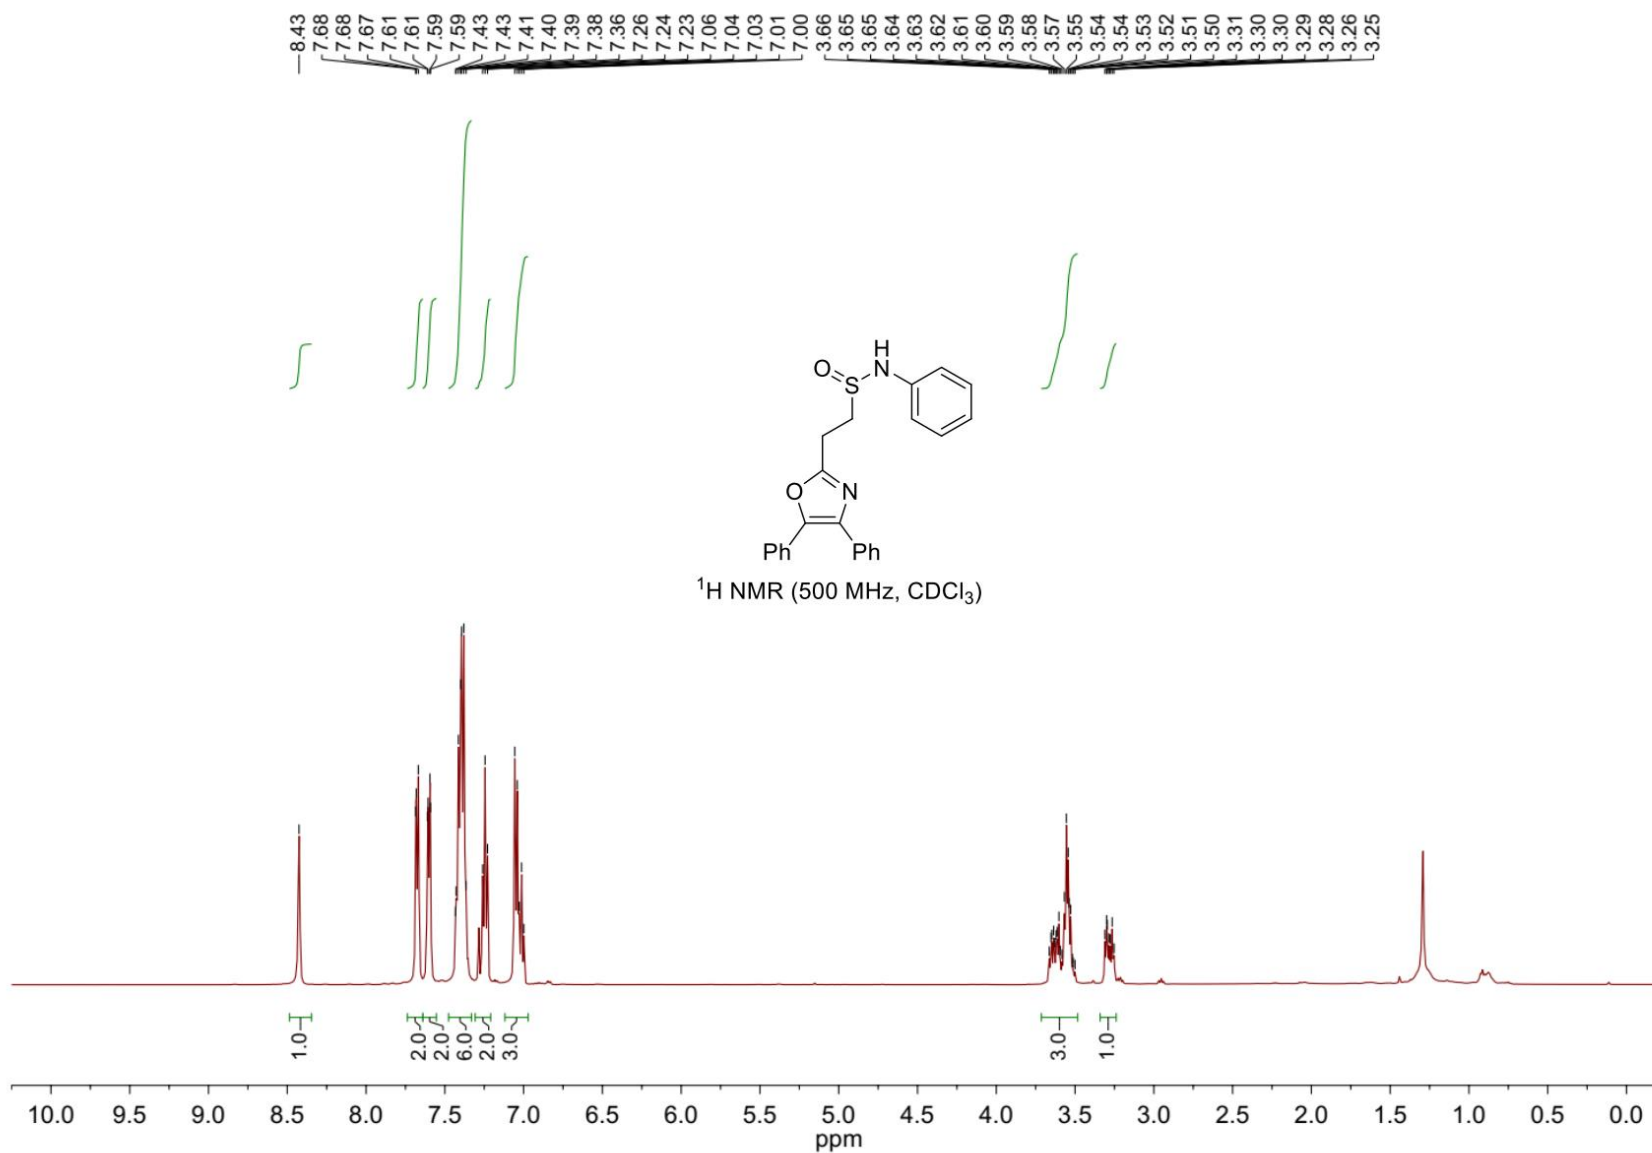

2-(4,5-Diphenyloxazol-2-yl)-N-phenylethane-1-sulfonamide (7e)

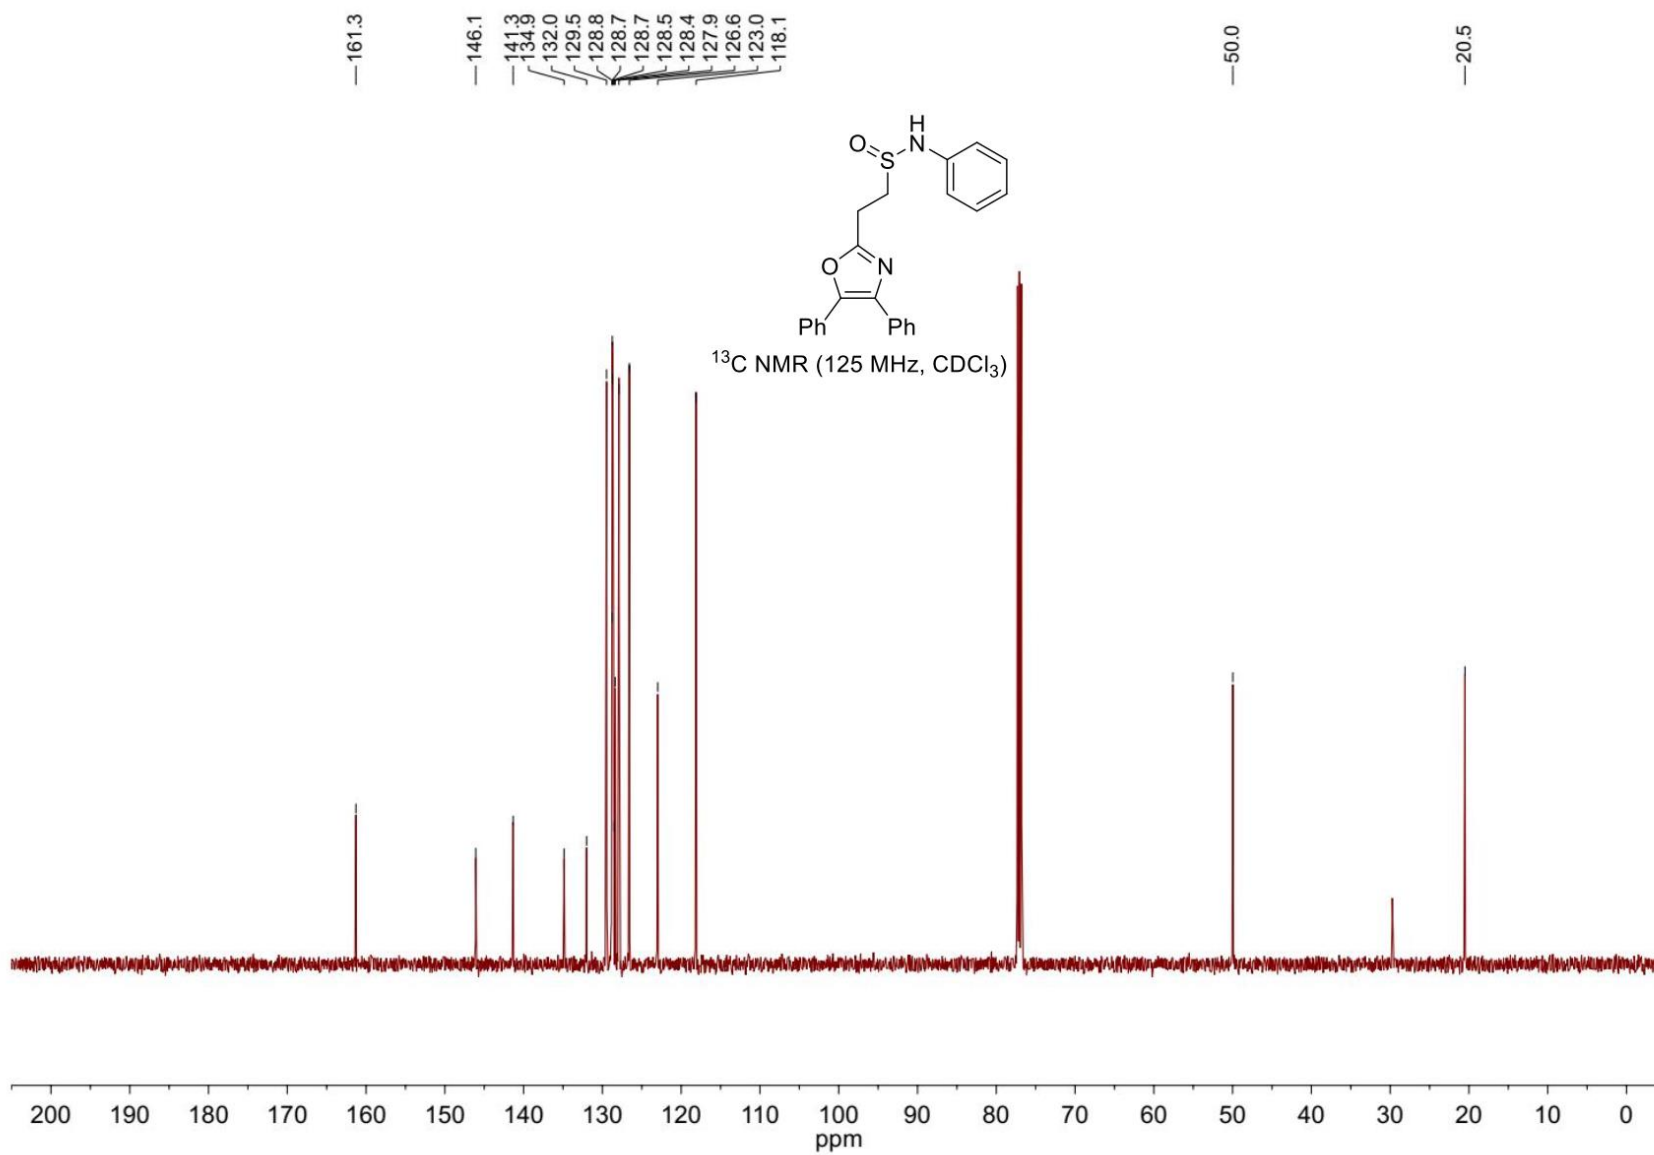

1-(11-Oxo-6,11-dihydrodibenzo[*b,e*]oxepin-2-yl)-*N*-phenylmethanesulfinamide (7f)

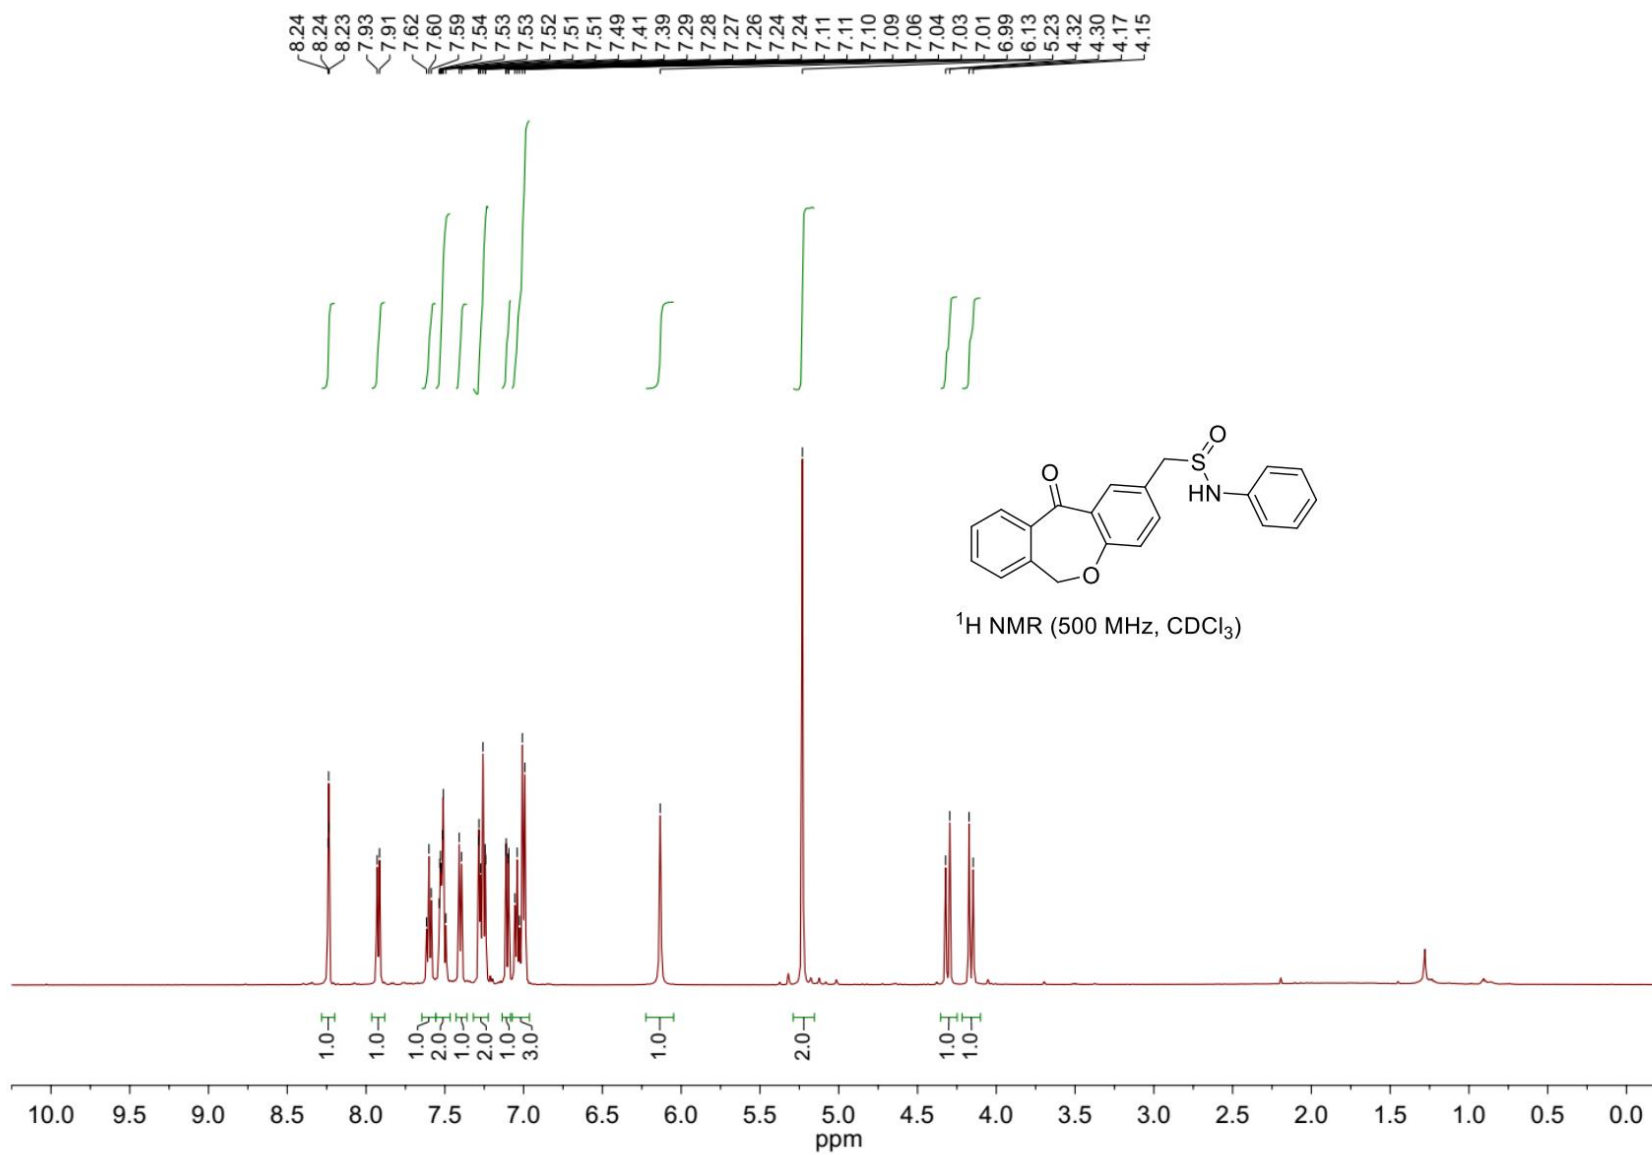

1-(11-Oxo-6,11-dihydrodibenzo[*b,e*]oxepin-2-yl)-*N*-phenylmethanesulfinamide (7f)

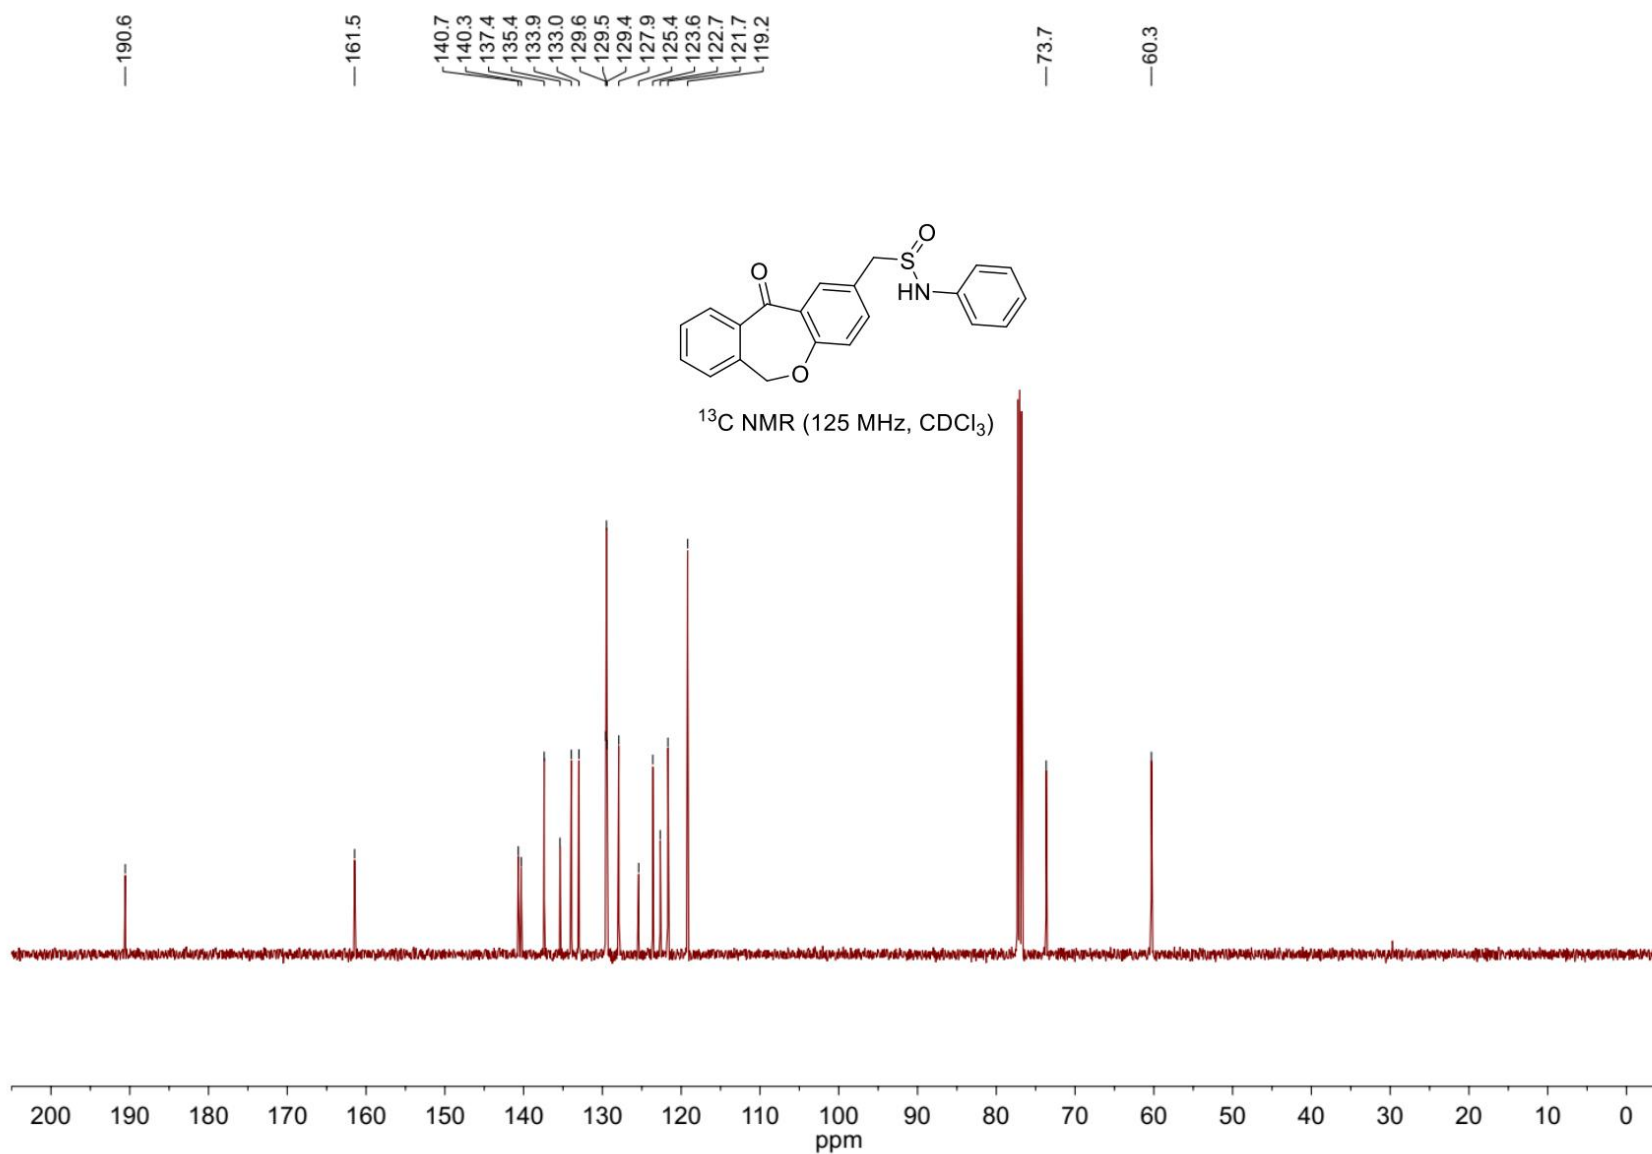

(Z)-N-Phenylhenicos-12-ene-1-sulfonamide (7g)

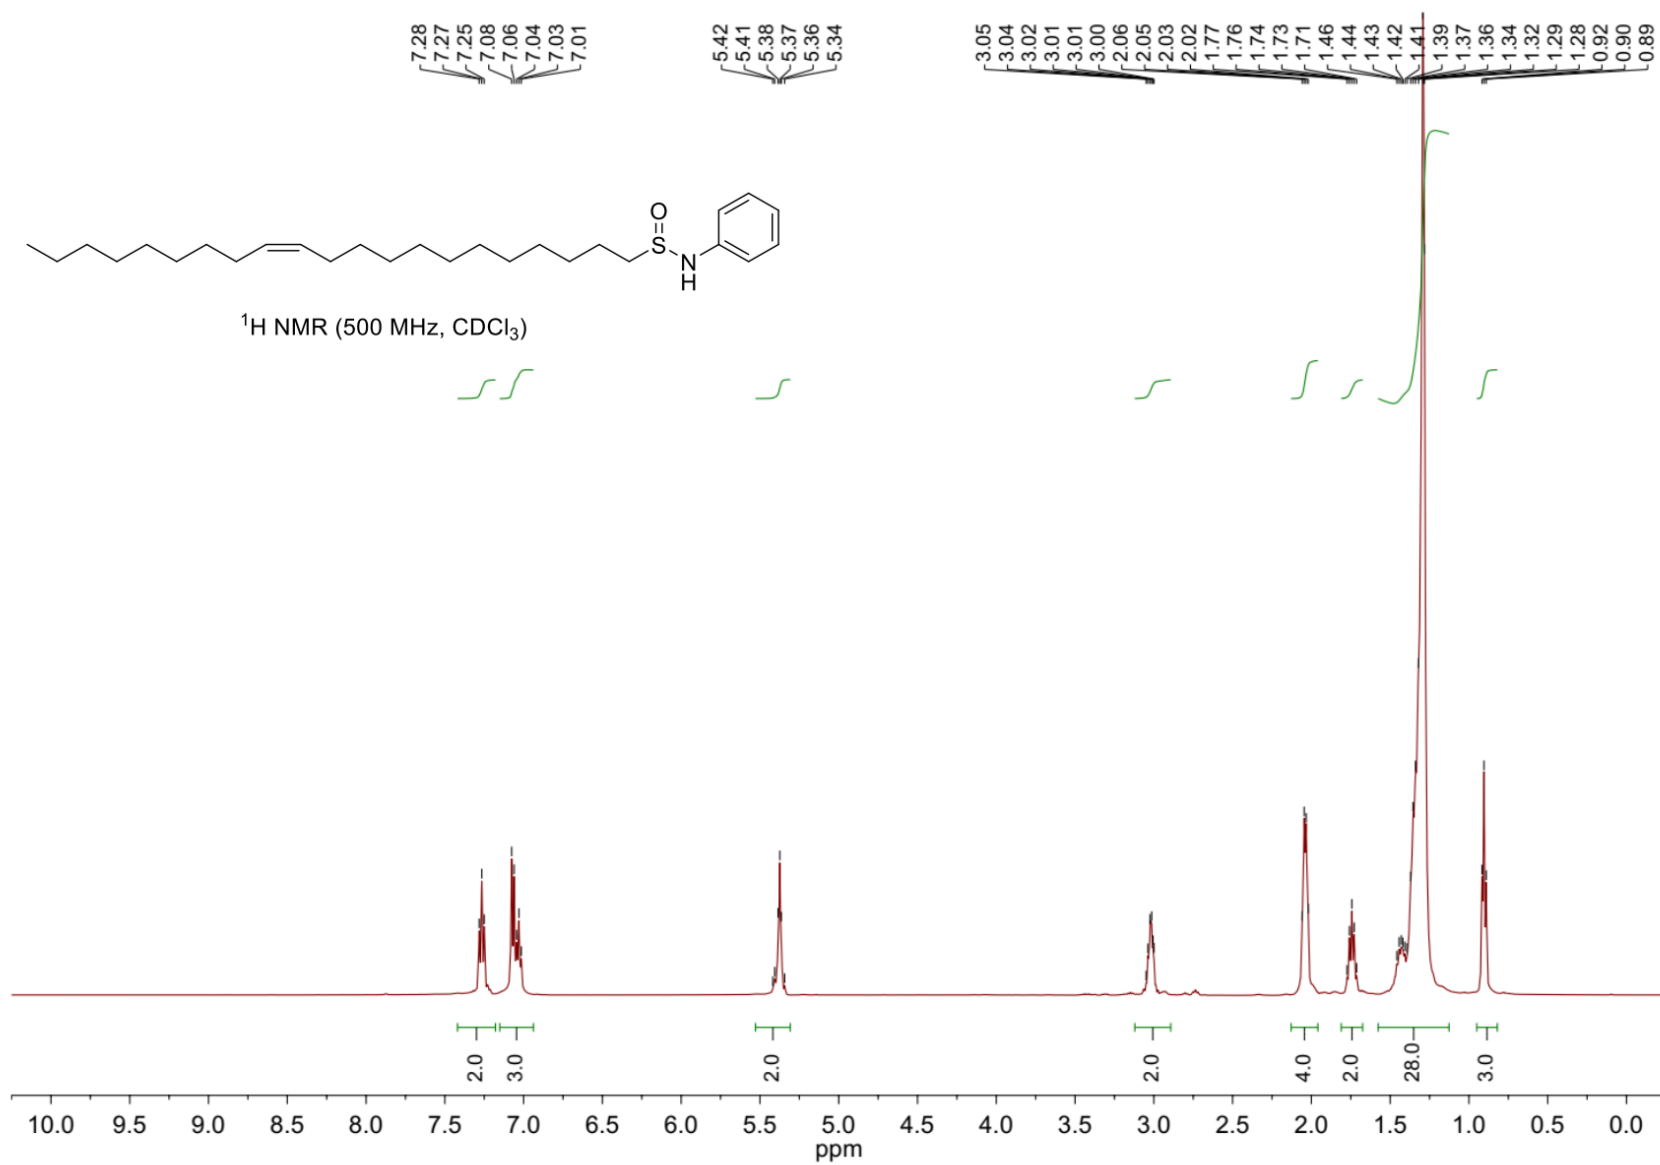

(Z)-N-Phenylhenicos-12-ene-1-sulfonamide (7g)

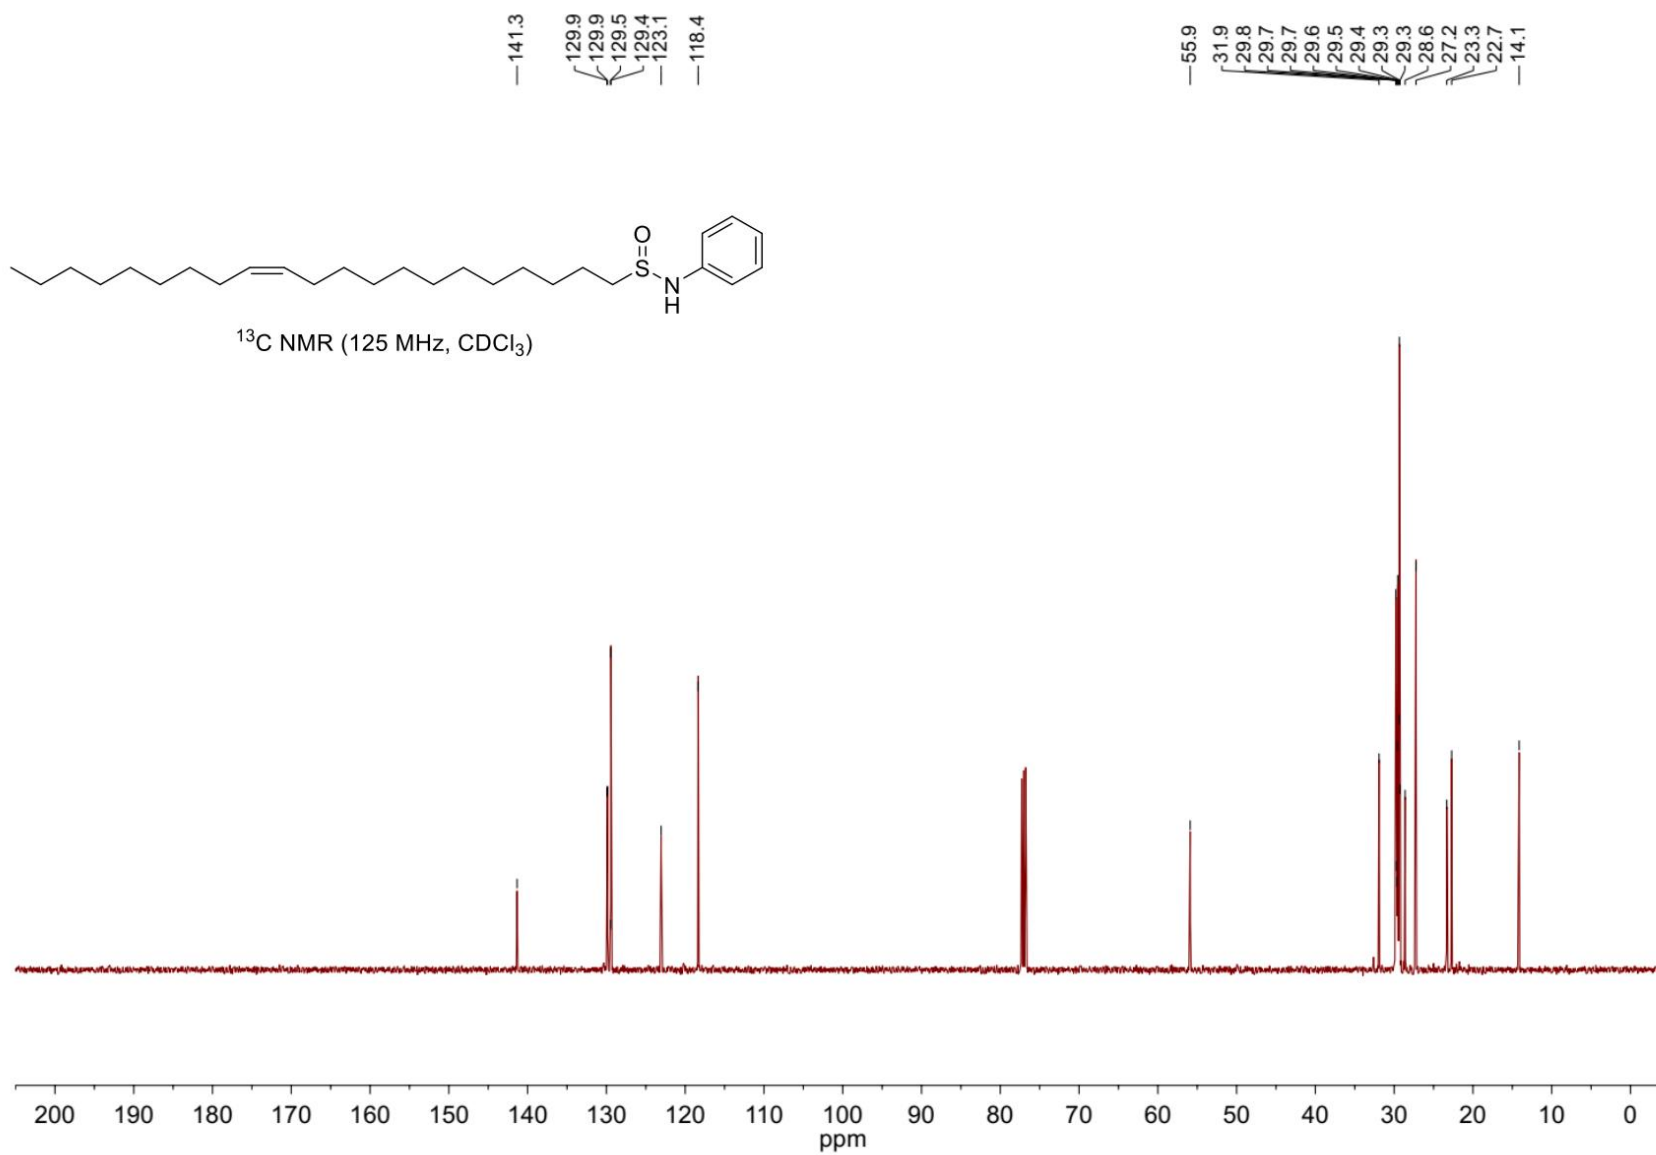

(8Z,11Z)-N-Phenylheptadeca-8,11-diene-1-sulfinamide (7h)

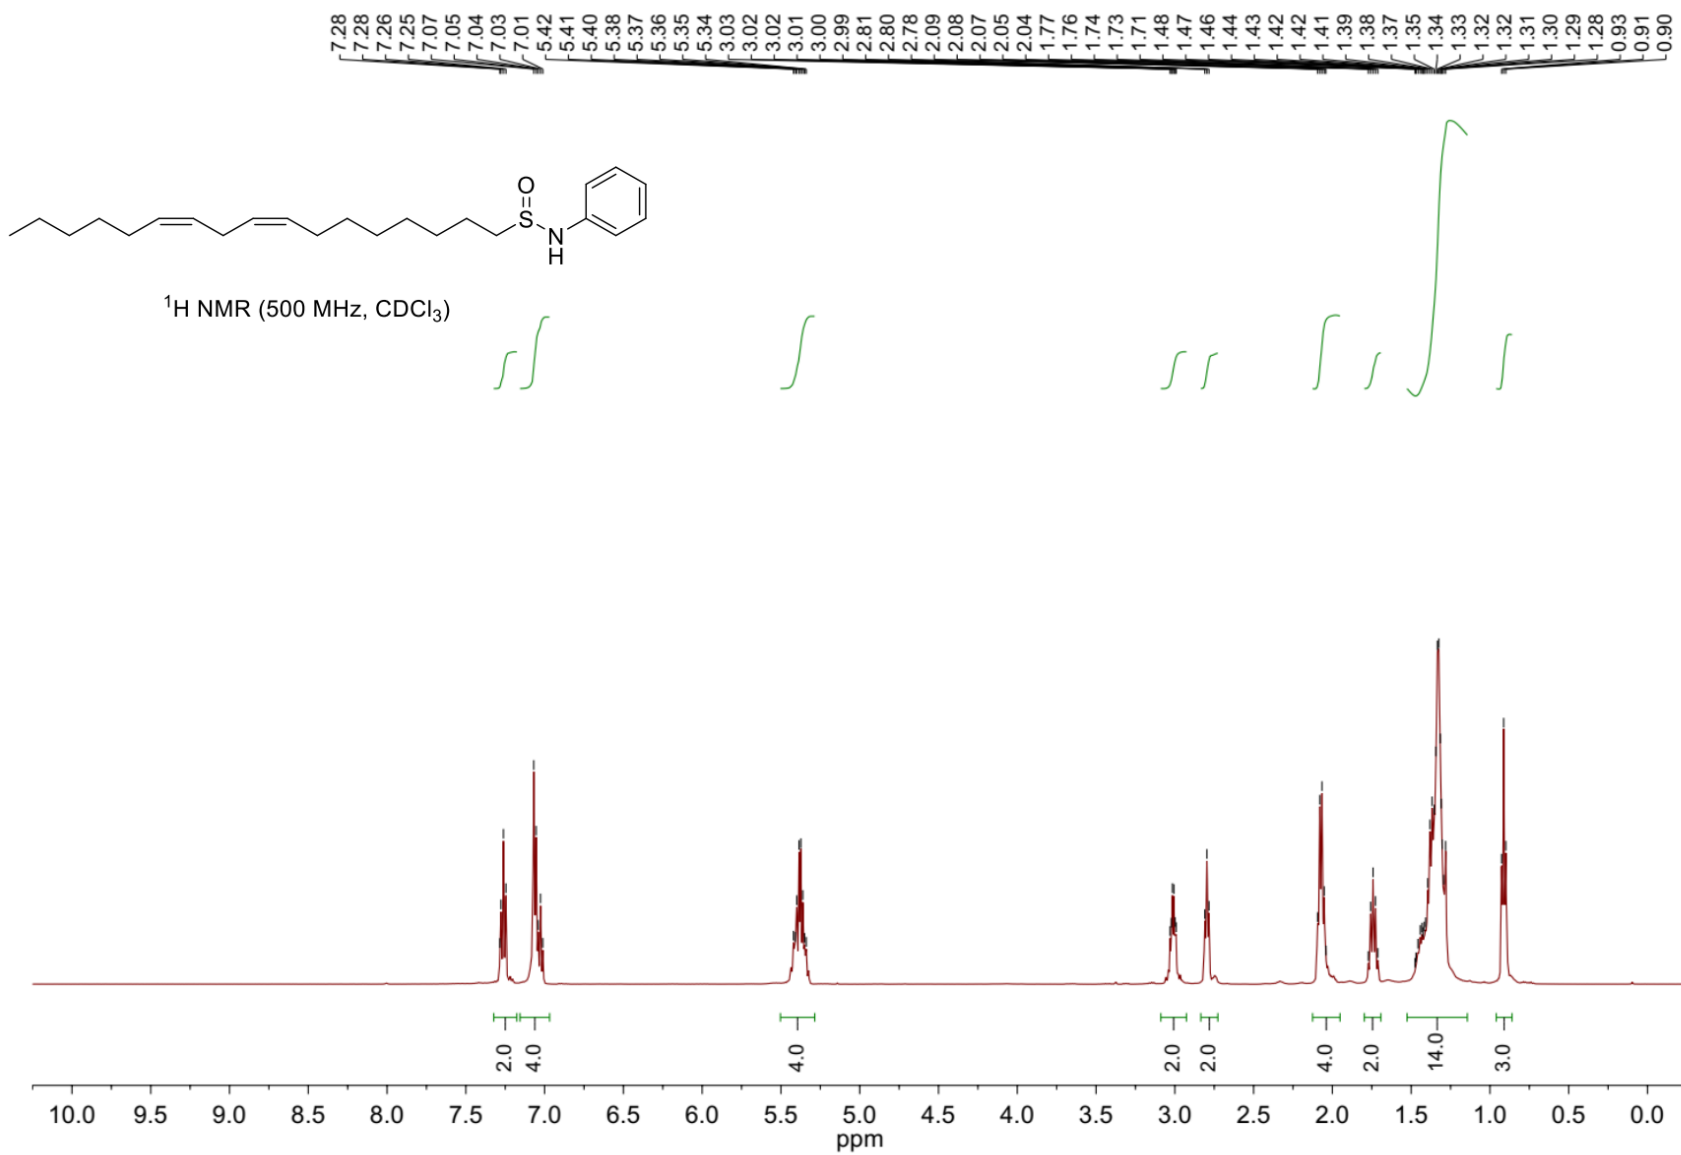



(8Z,11Z)-N-Phenylheptadeca-8,11-diene-1-sulfonamide (7h)

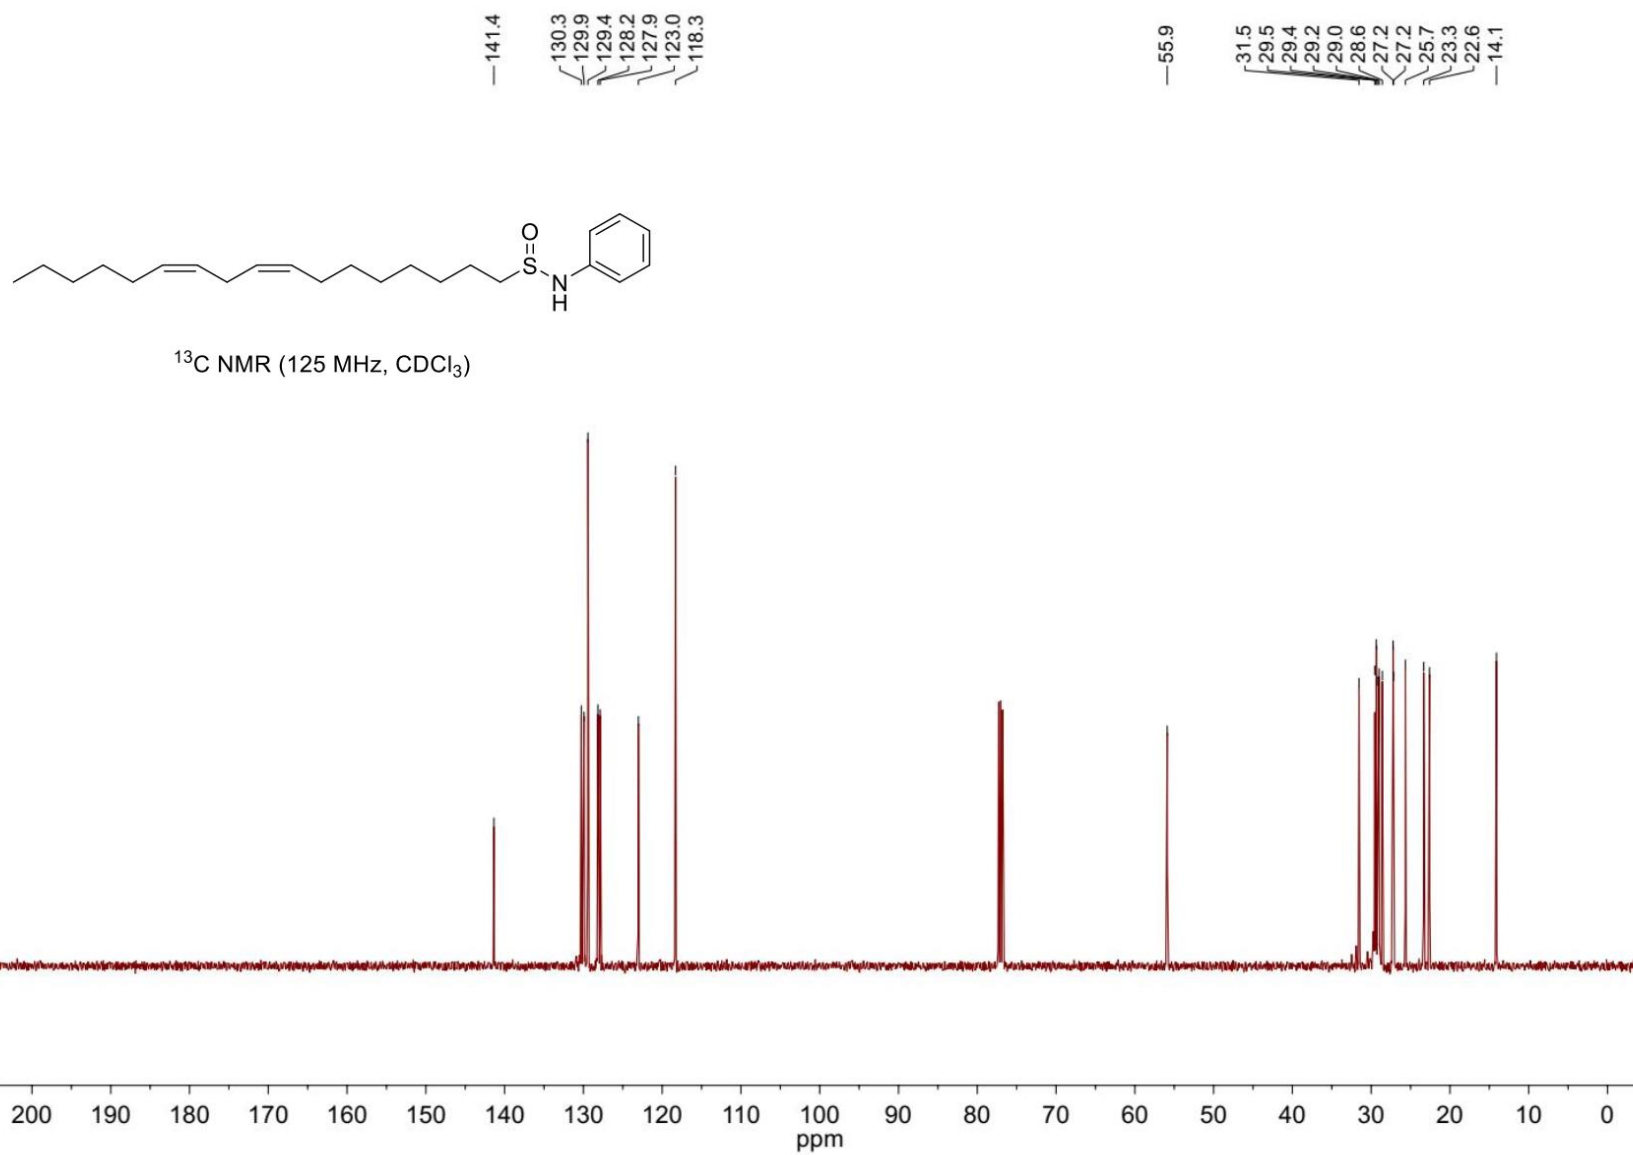

# N-Phenyltetracos-9,11-diyne-1-sulfinamide (7i)

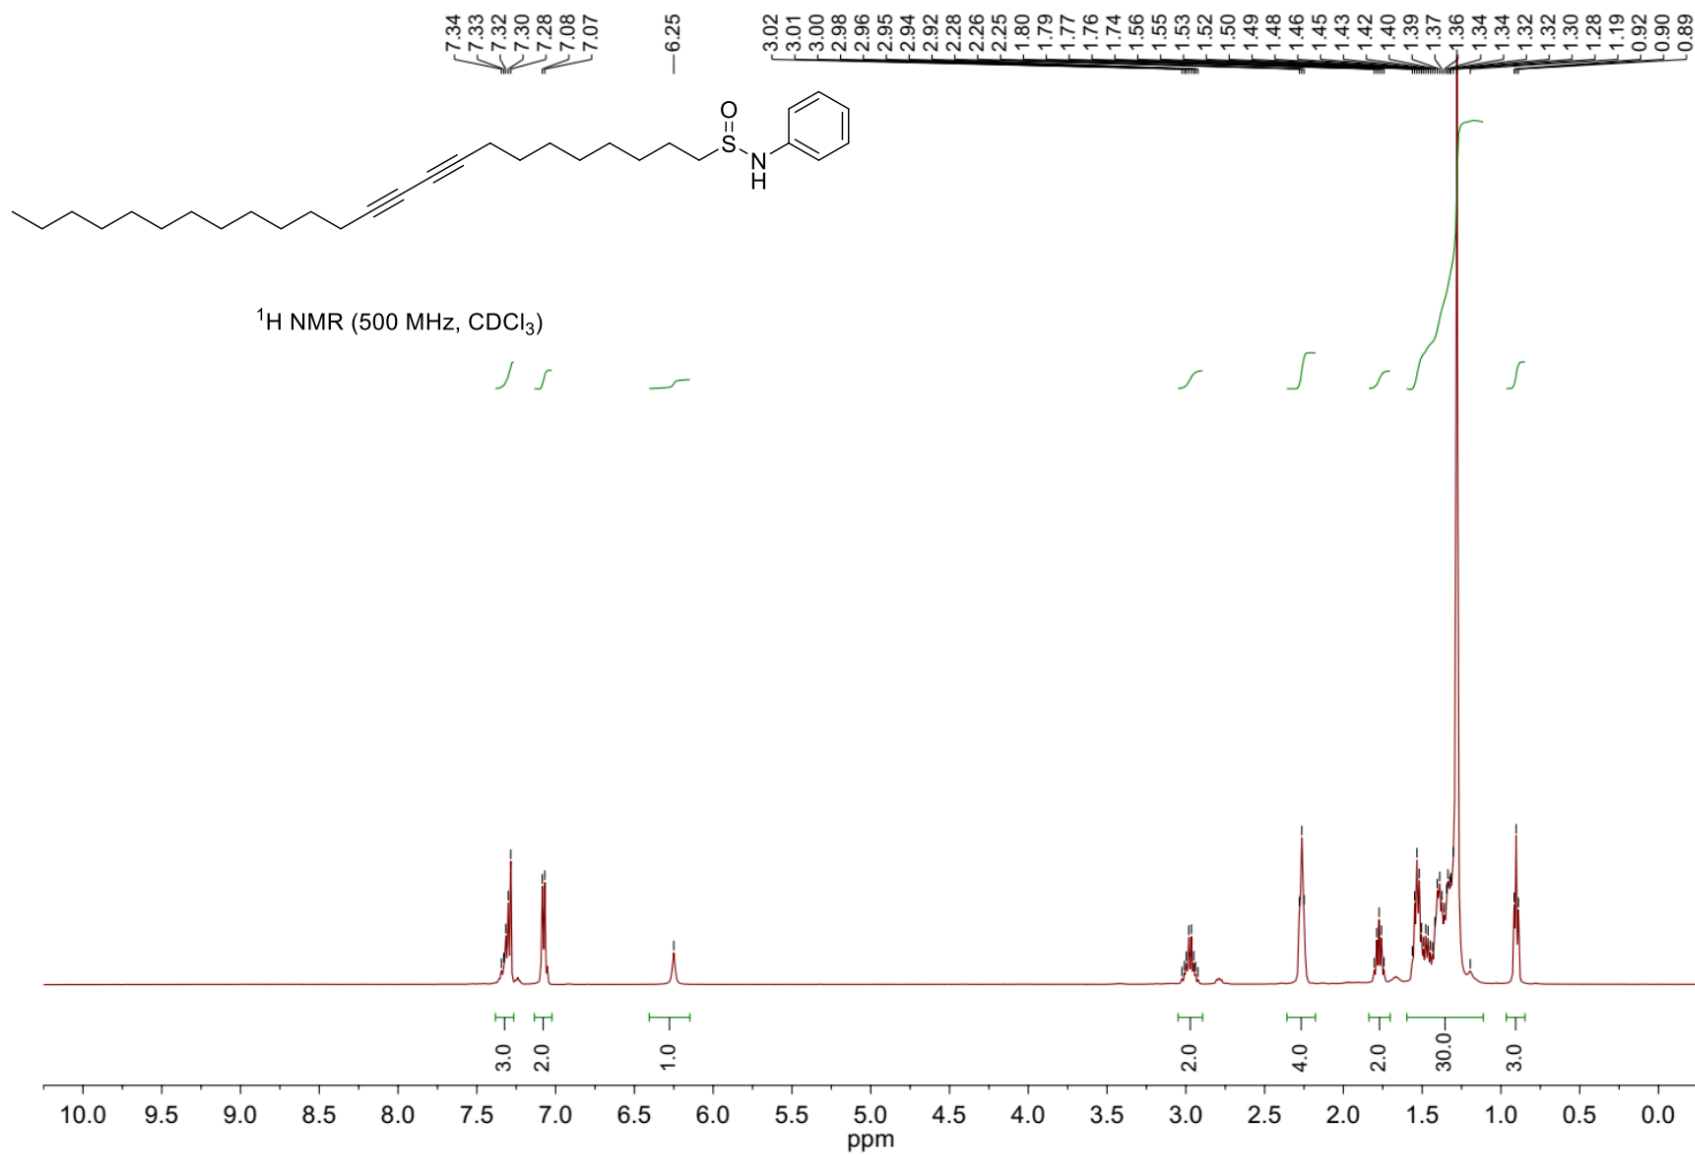

### N-Phenyltetracos-9,11-diyne-1-sulfonamide (7i)

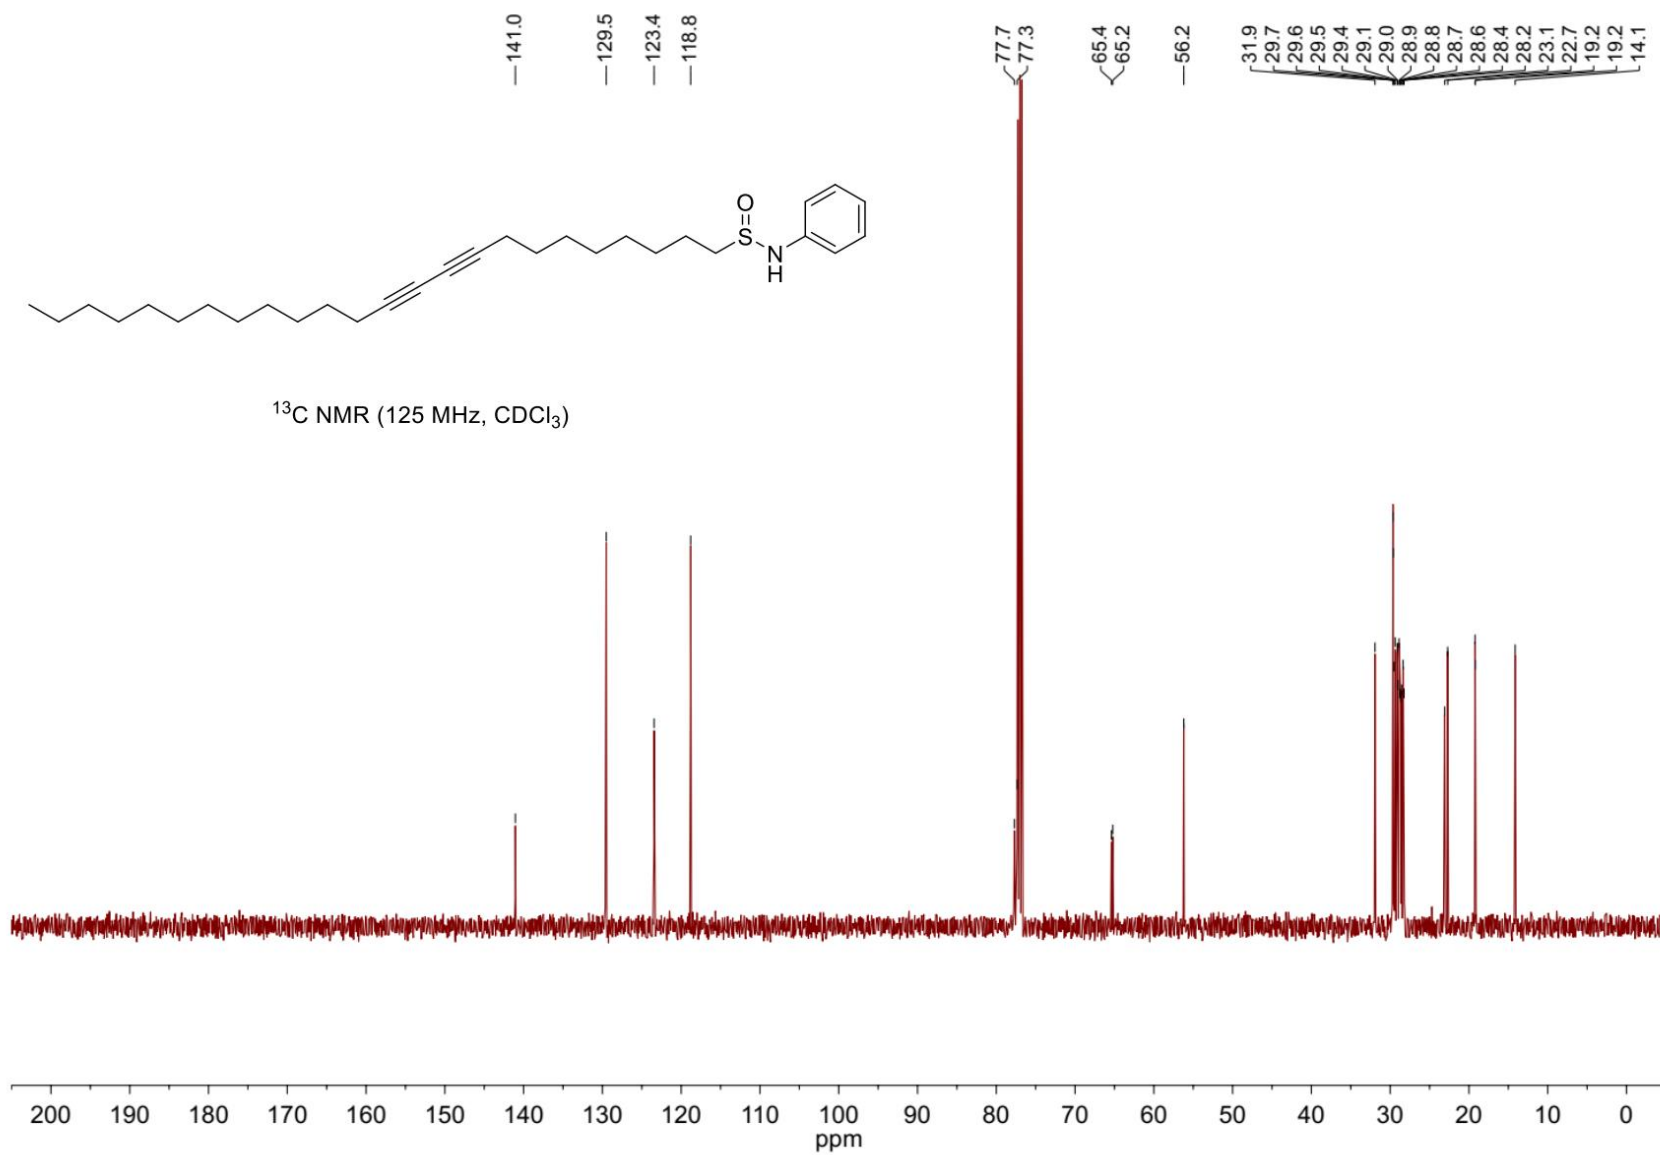

1-((1S,3R)-3-Acetyl-2,2-dimethylcyclobutyl)-N-phenylmethanesulfonamide (7j)

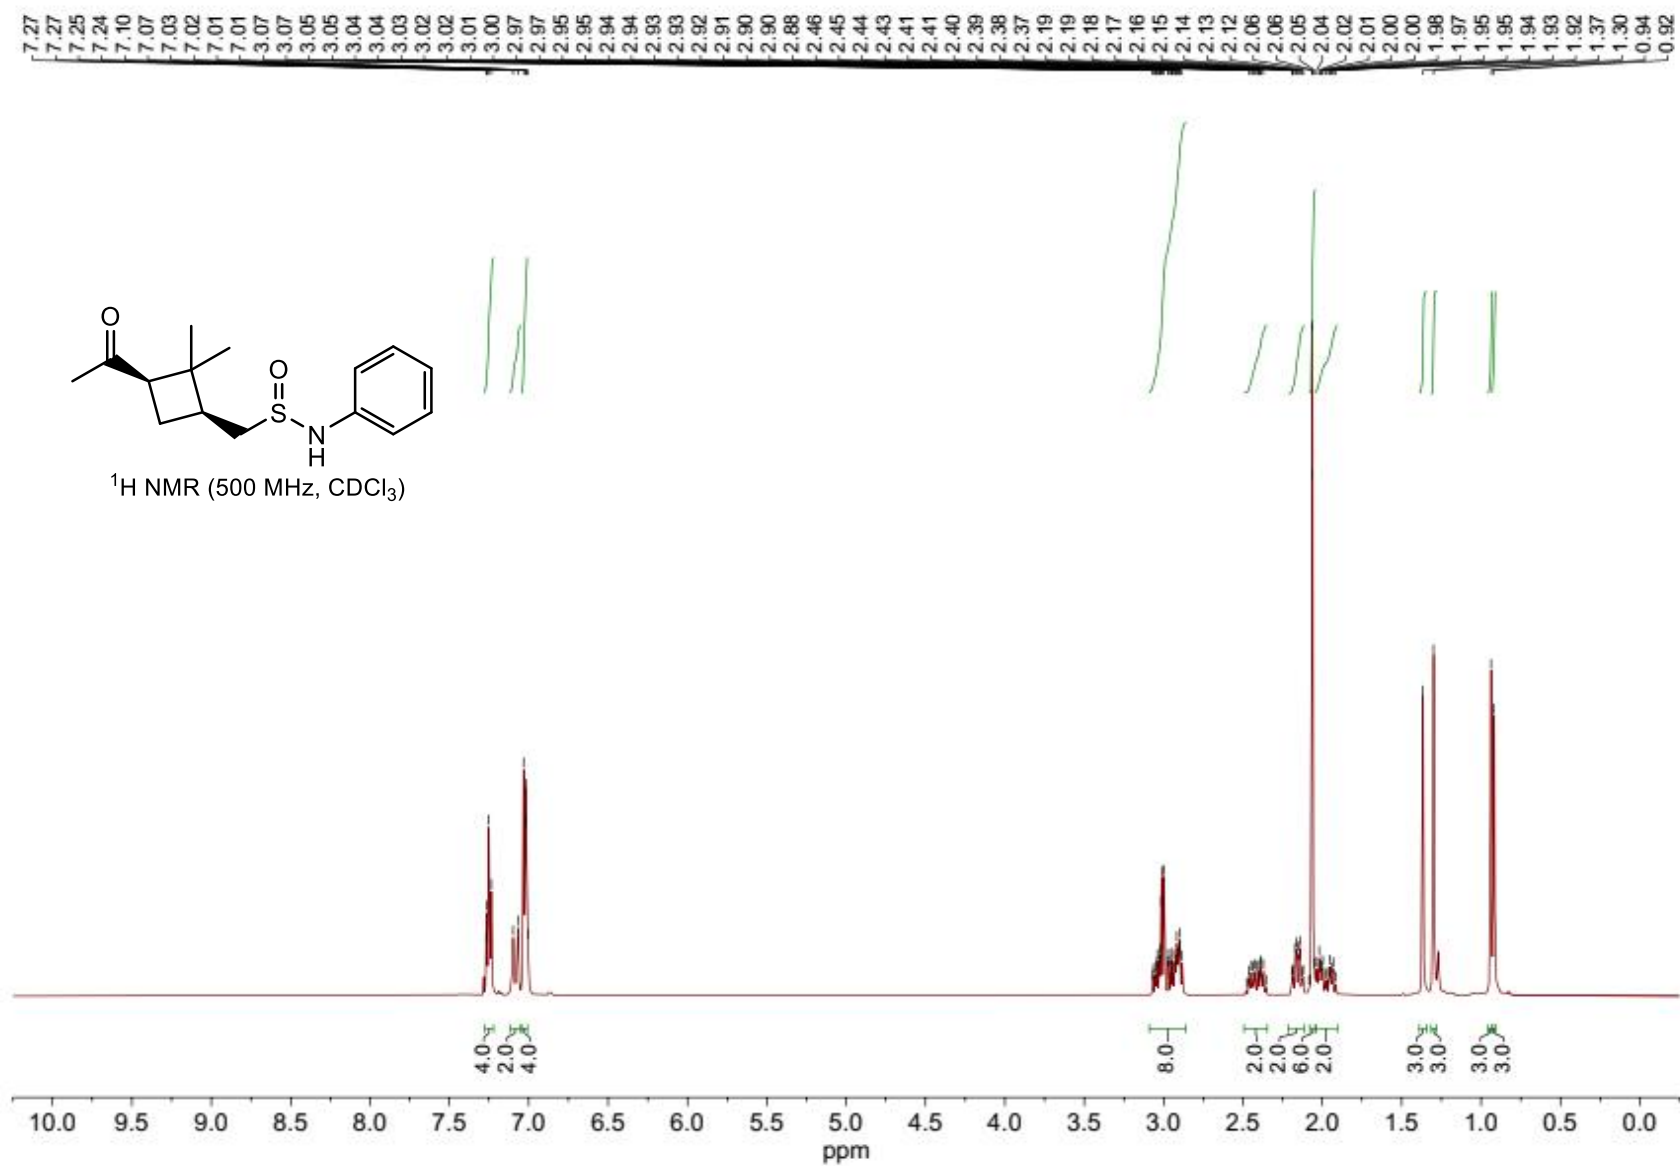

1-((1S,3R)-3-Acetyl-2,2-dimethylcyclobutyl)-N-phenylmethanesulfonamide (7j)

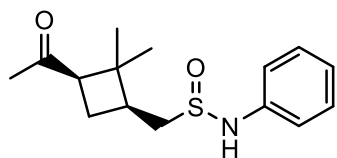

<sup>13</sup>C NMR (125 MHz, CDCl<sub>3</sub>)

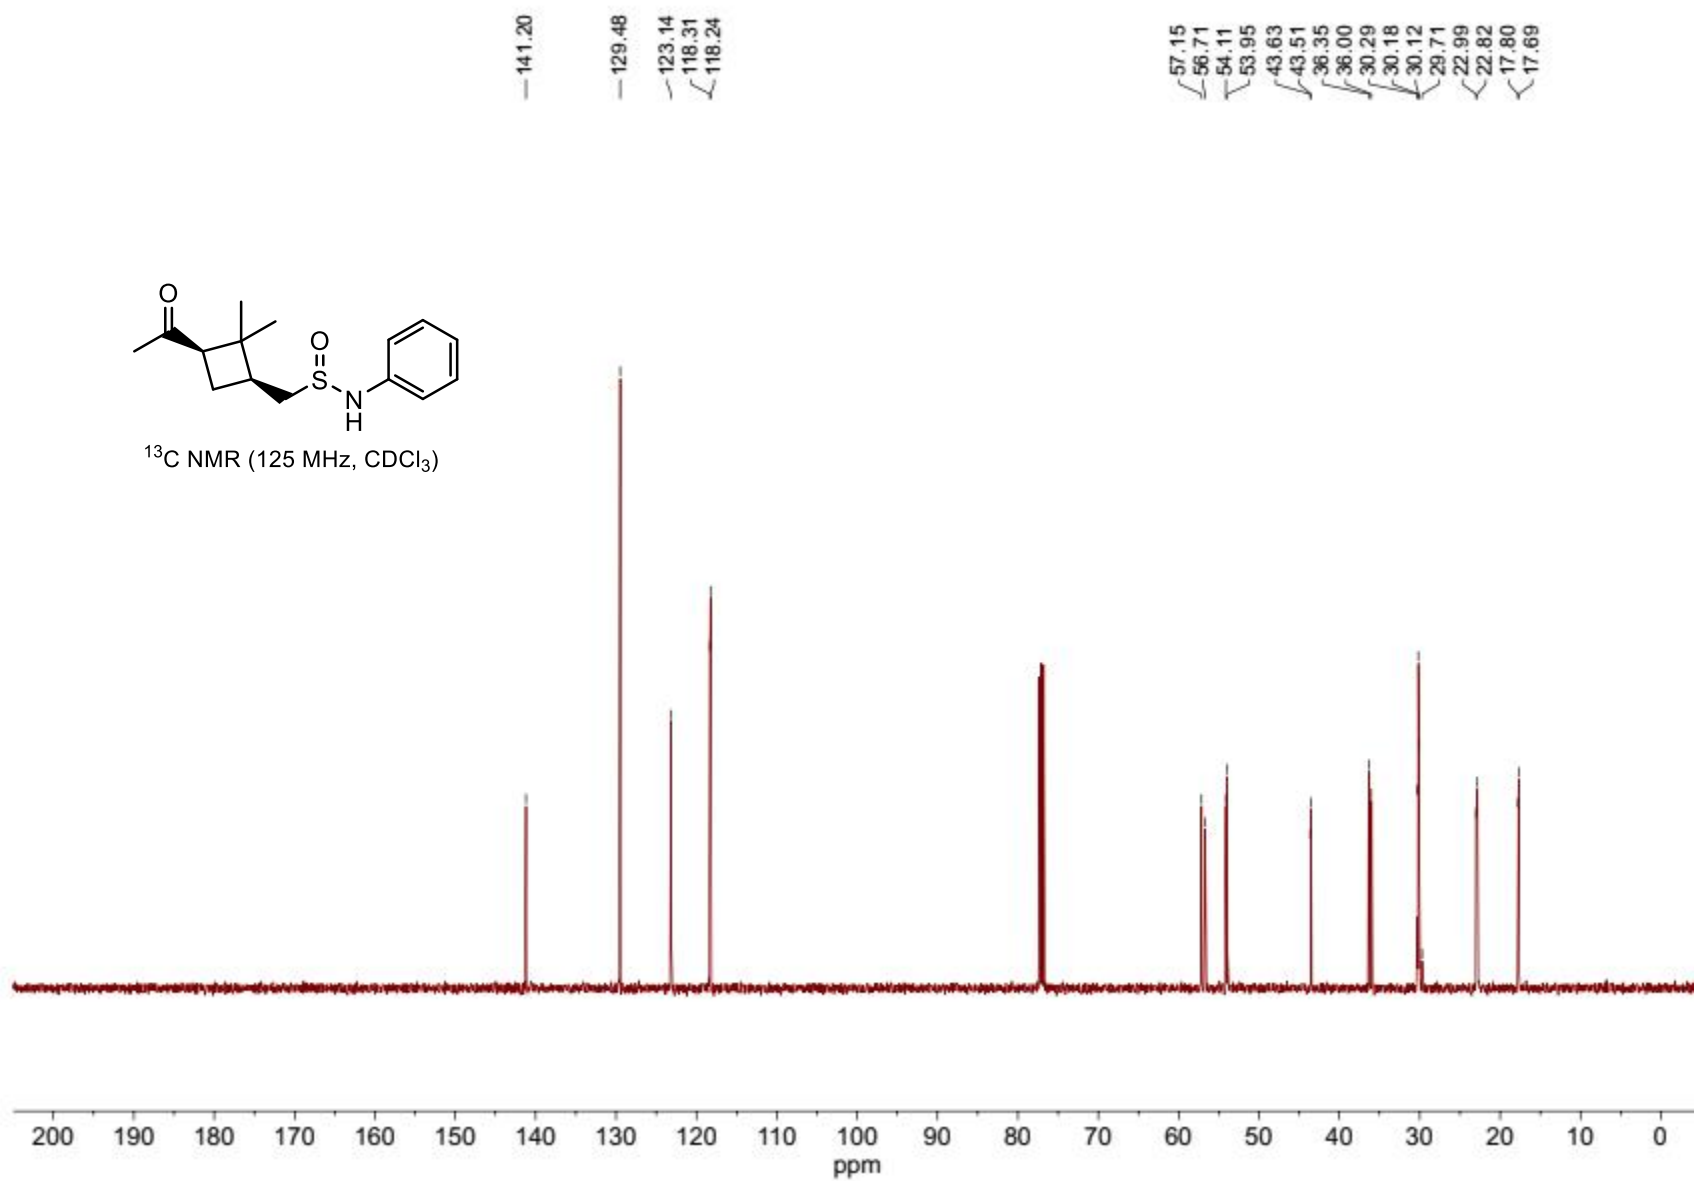

(6a*S*,6b*R*,8a*R*,10*S*,12a*R*,12b*R*,14b*S*)-10-hydroxy-2,2,6a,6b,9,9,12a-heptamethyl-*N*-phenyl-1,3,4,5,6,6a,6b,7,8,8a,9,10,11,12,12a,12b,13,14b-octadecahydronicene-4a(2*H*)-sulfonamide (7k)

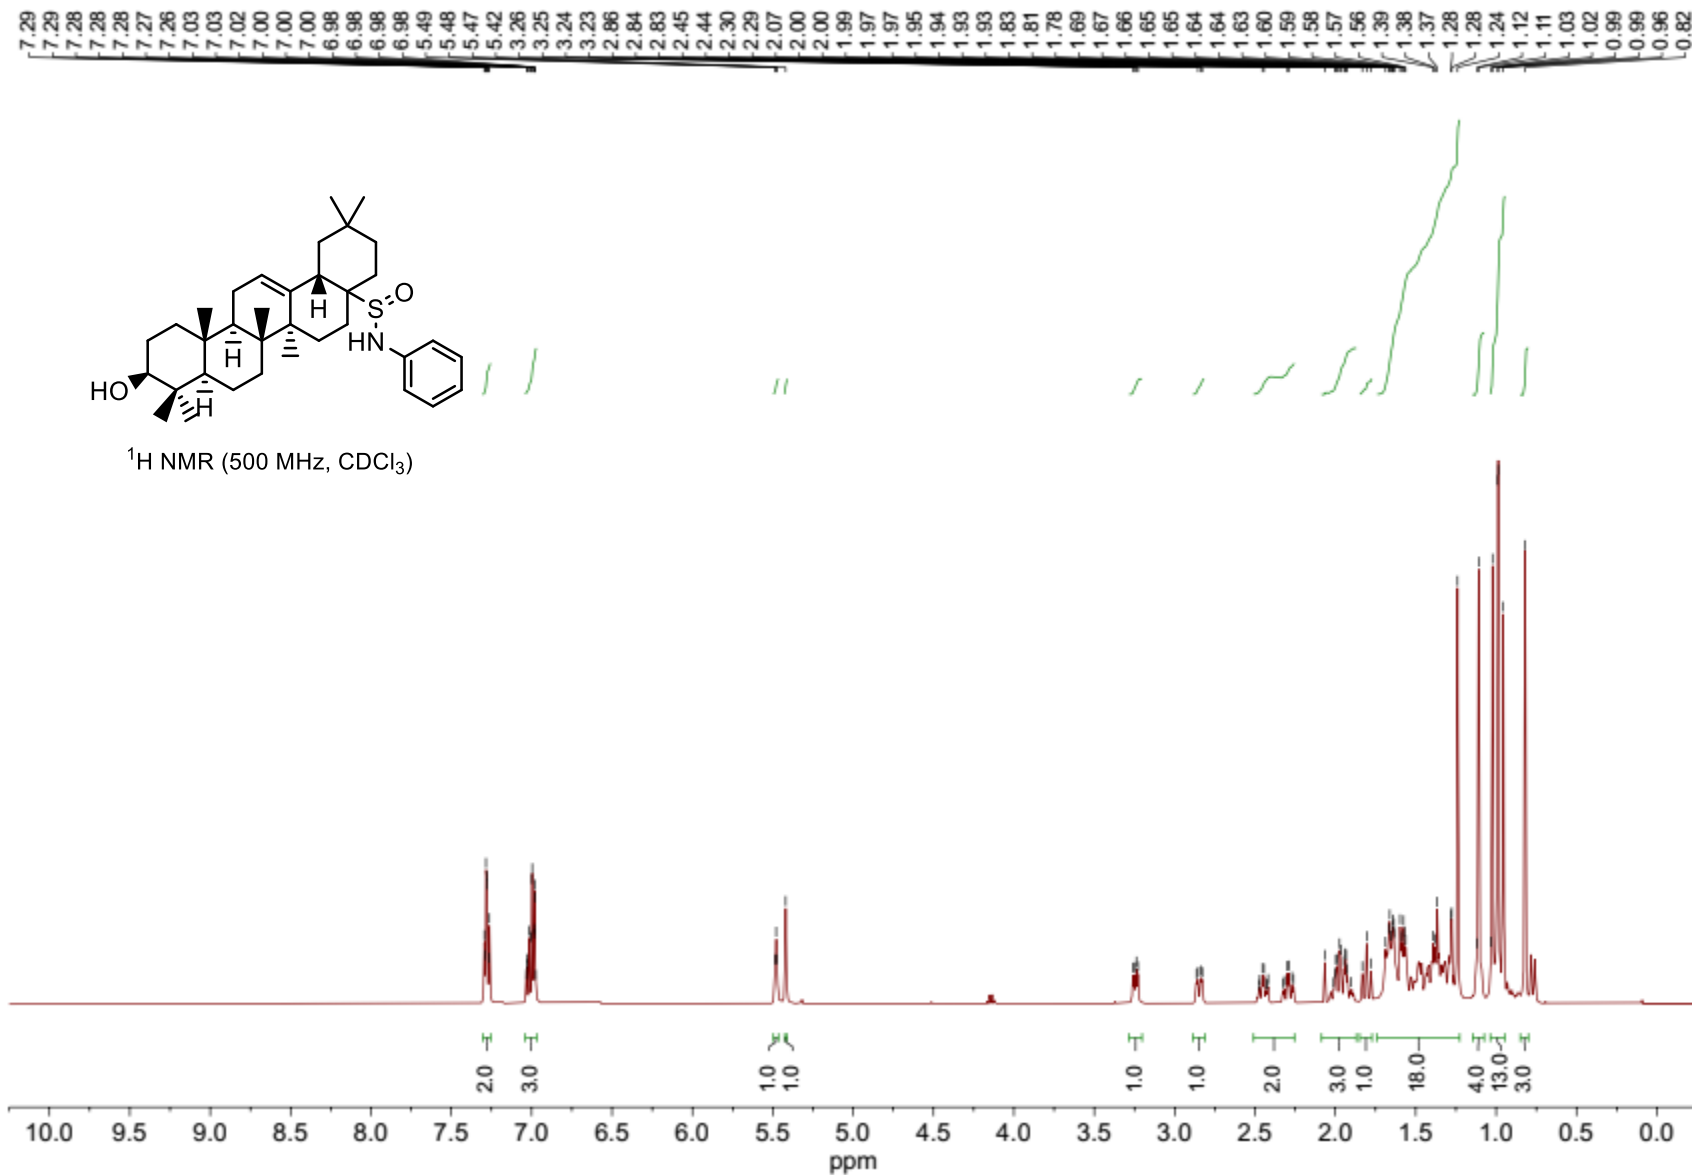

(6*a*S,6*b*R,8*a*R,10*S*,12*a*R,12*b*R,14*b*S)-10-hydroxy-2,2,6*a*,6*b*,9,9,12*a*-heptamethyl-*N*-phenyl-1,3,4,5,6,6*a*,6*b*,7,8,8*a*,9,10,11,12,12*a*,12*b*,13,14*b*-octadecahydropicene-4*a*(2*H*)-sulfonamide (7k)

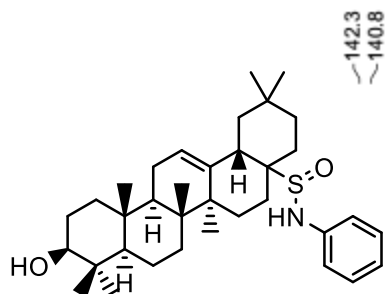

<sup>13</sup>C NMR (125 MHz, CDCl<sub>3</sub>)

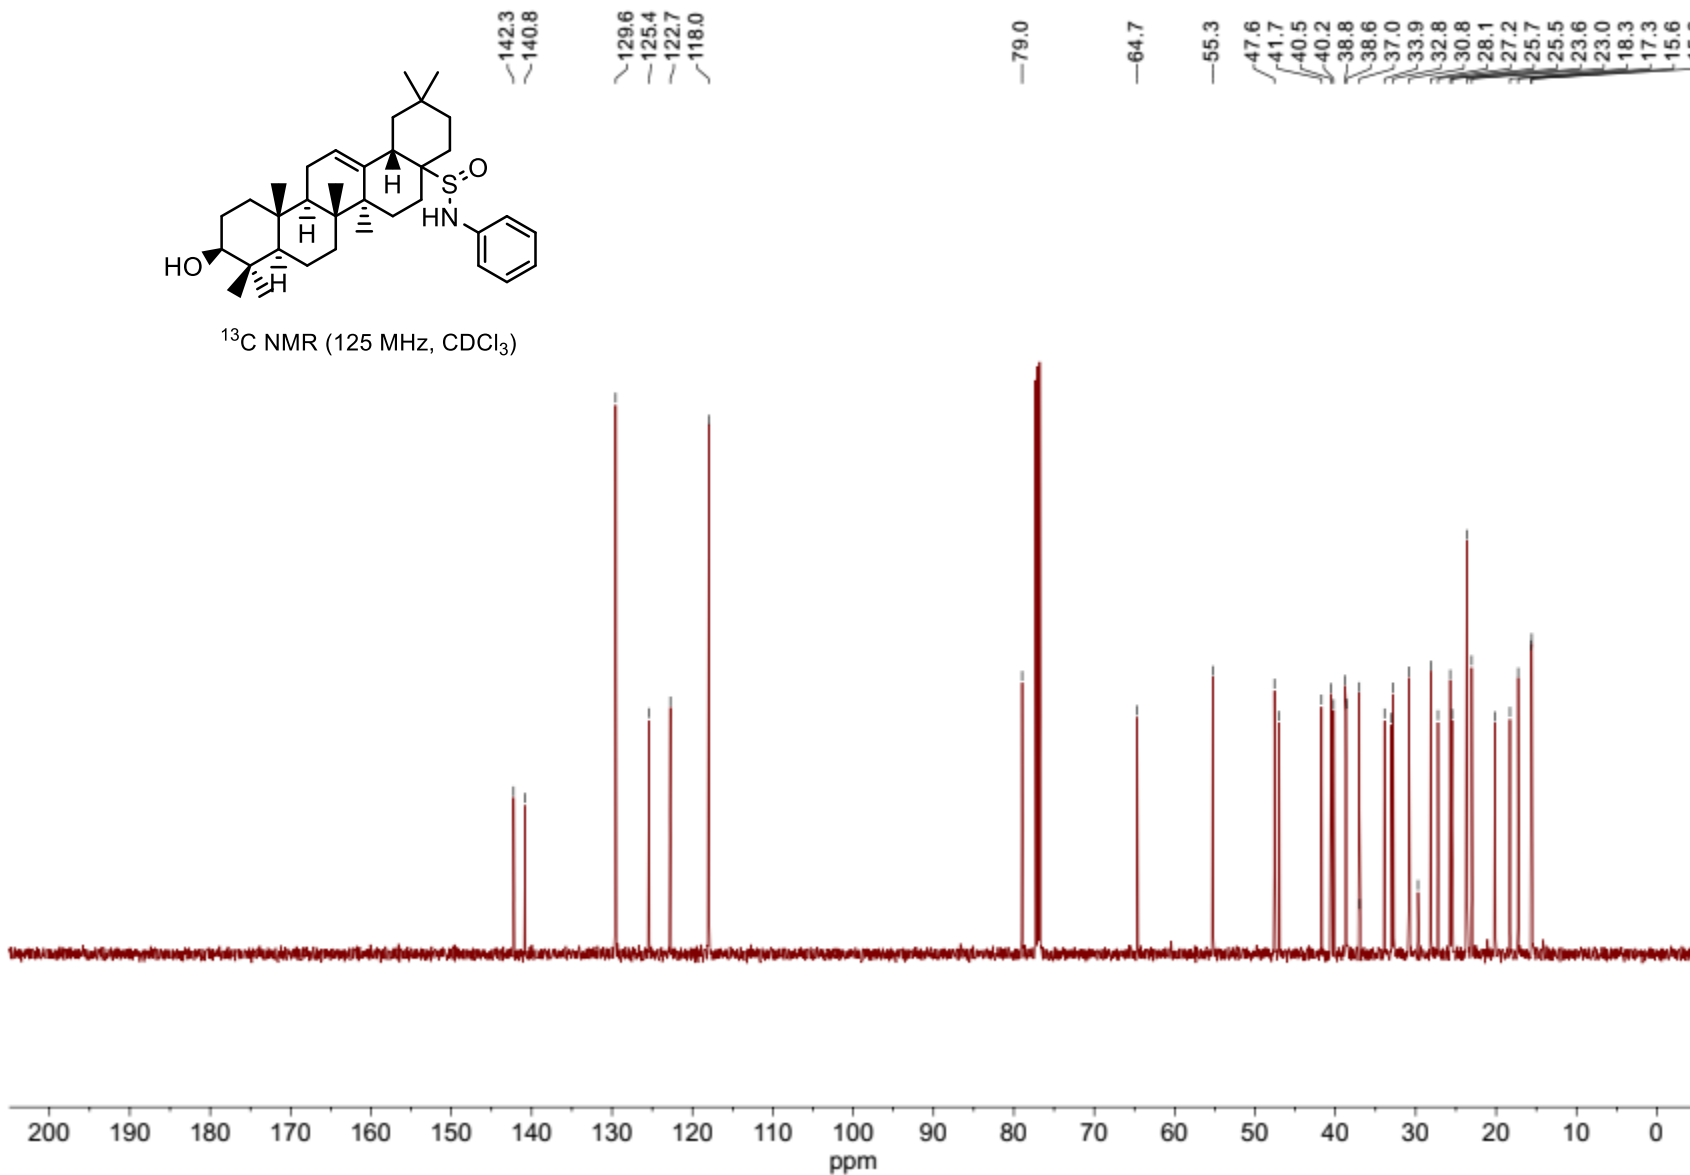

(3*S*,6*aR*,6*bS*,8*aS*,11*S*,12*aS*,14*aR*,14*bS*)-4,4,6*a*,6*b*,8*a*,11,14*b*-Heptamethyl-14-oxo-11-((phenylamino)sulfinyl)-1,2,3,4,4*a*,5,6,6*a*,6*b*,7,8,8*a*,9,10,11,12,12*a*,14,14*a*,14*b*-icosahdropicen-3-yl acetate (71)

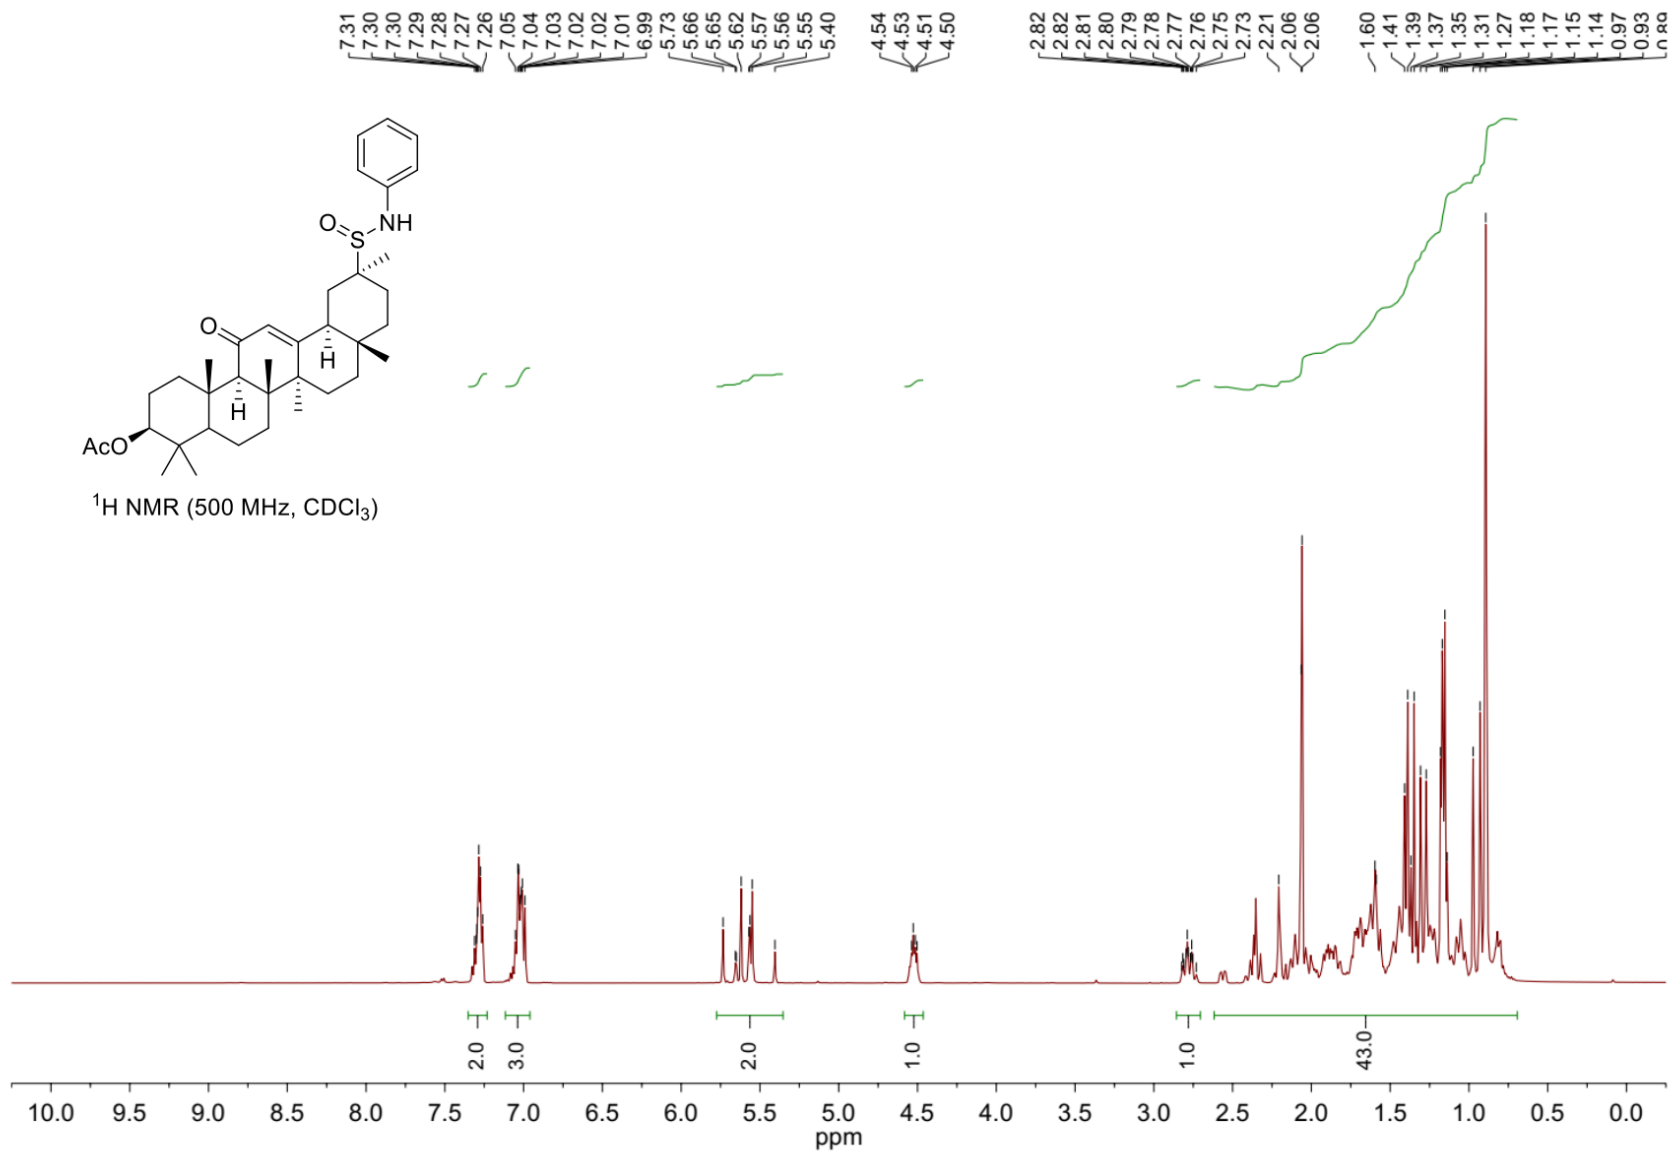



(3*S*,6*aR*,6*bS*,8*aS*,11*S*,12*aS*,14*aR*,14*bS*)-4,4,6*a*,6*b*,8*a*,11,14*b*-Heptamethyl-14-oxo-11-((phenylamino)sulfinyl)-1,2,3,4,4*a*,5,6,6*a*,6*b*,7,8,8*a*,9,10,11,12,12*a*,14,14*a*,14*b*-icosahdropicen-3-yl acetate (71)

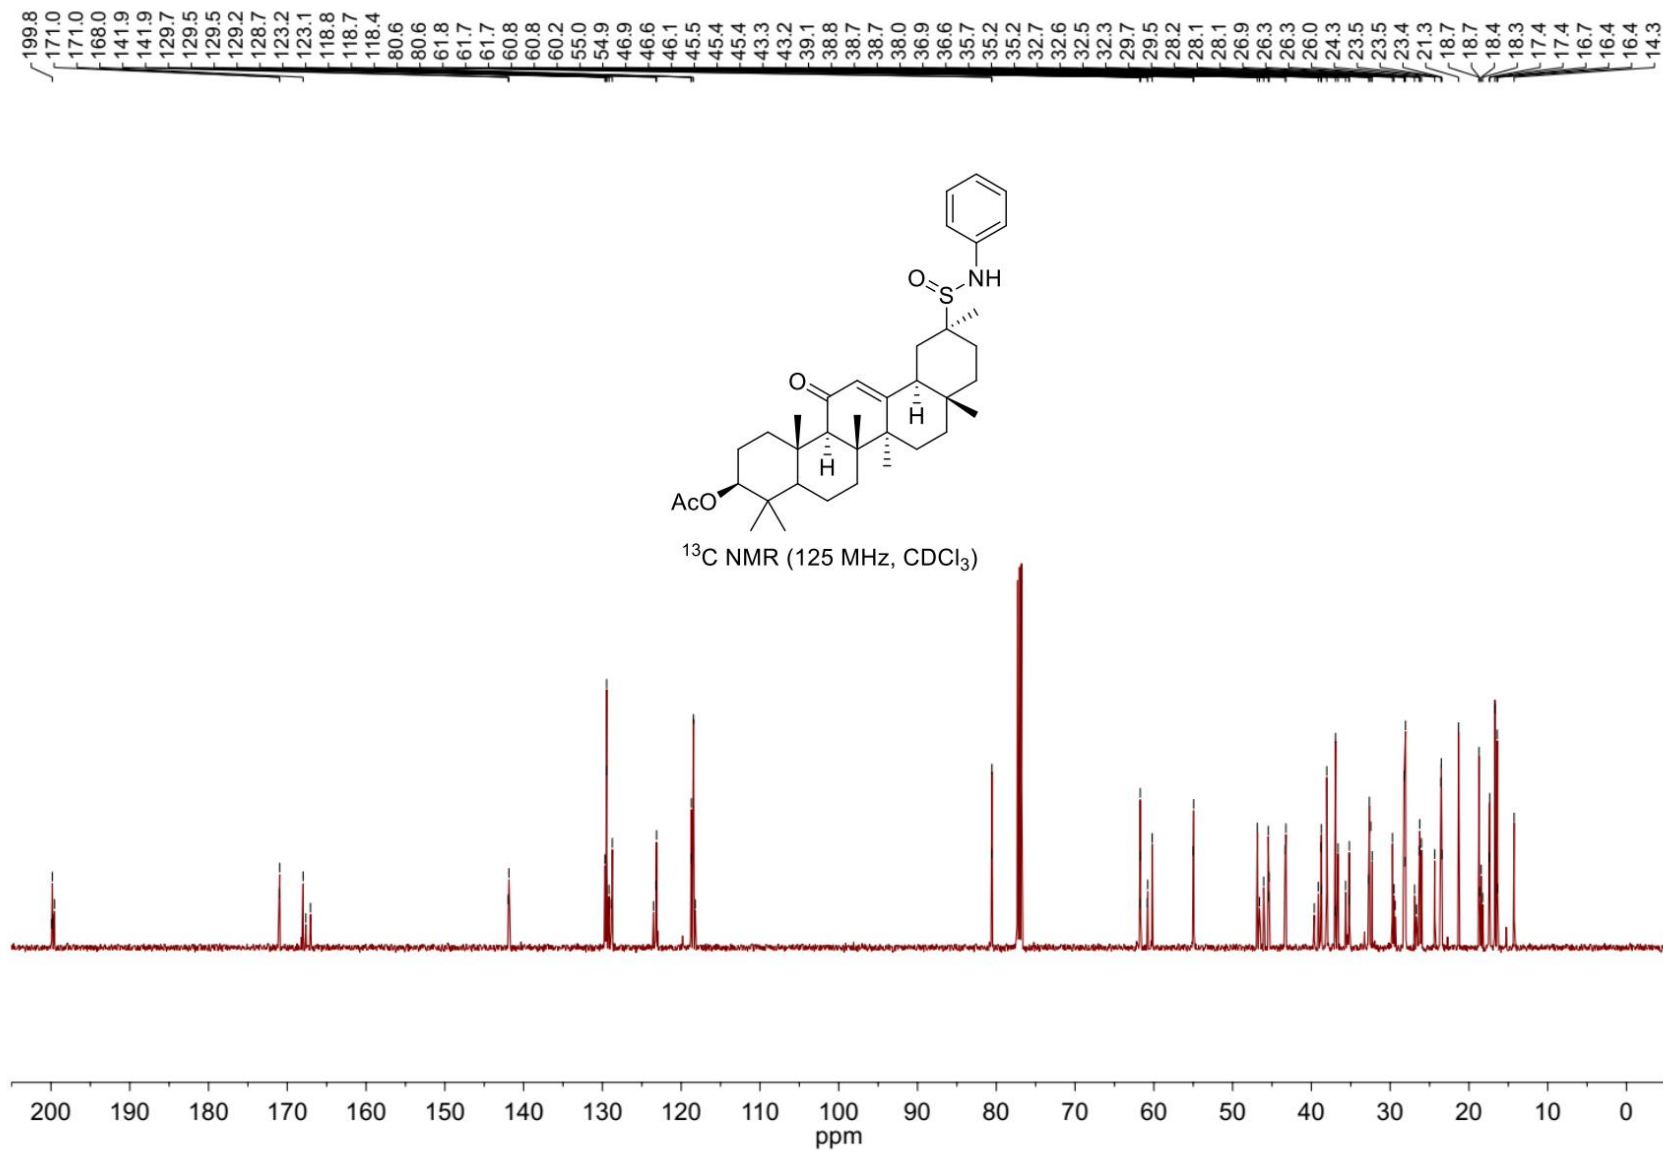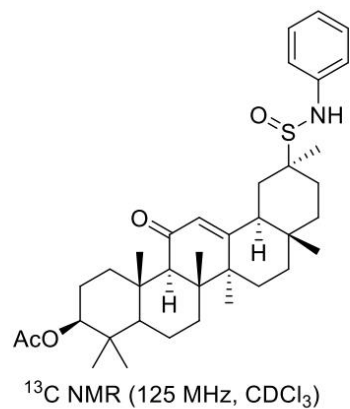

**(3R)-3-((3R,7R,8R,9S,10S,13R,14S,17R)-3,7-Dihydroxy-10,13-dimethylhexadecahydro-1H-cyclopenta[a]phenanthren-17-yl)-N-phenylbutane-1-sulfonamide (7m)**

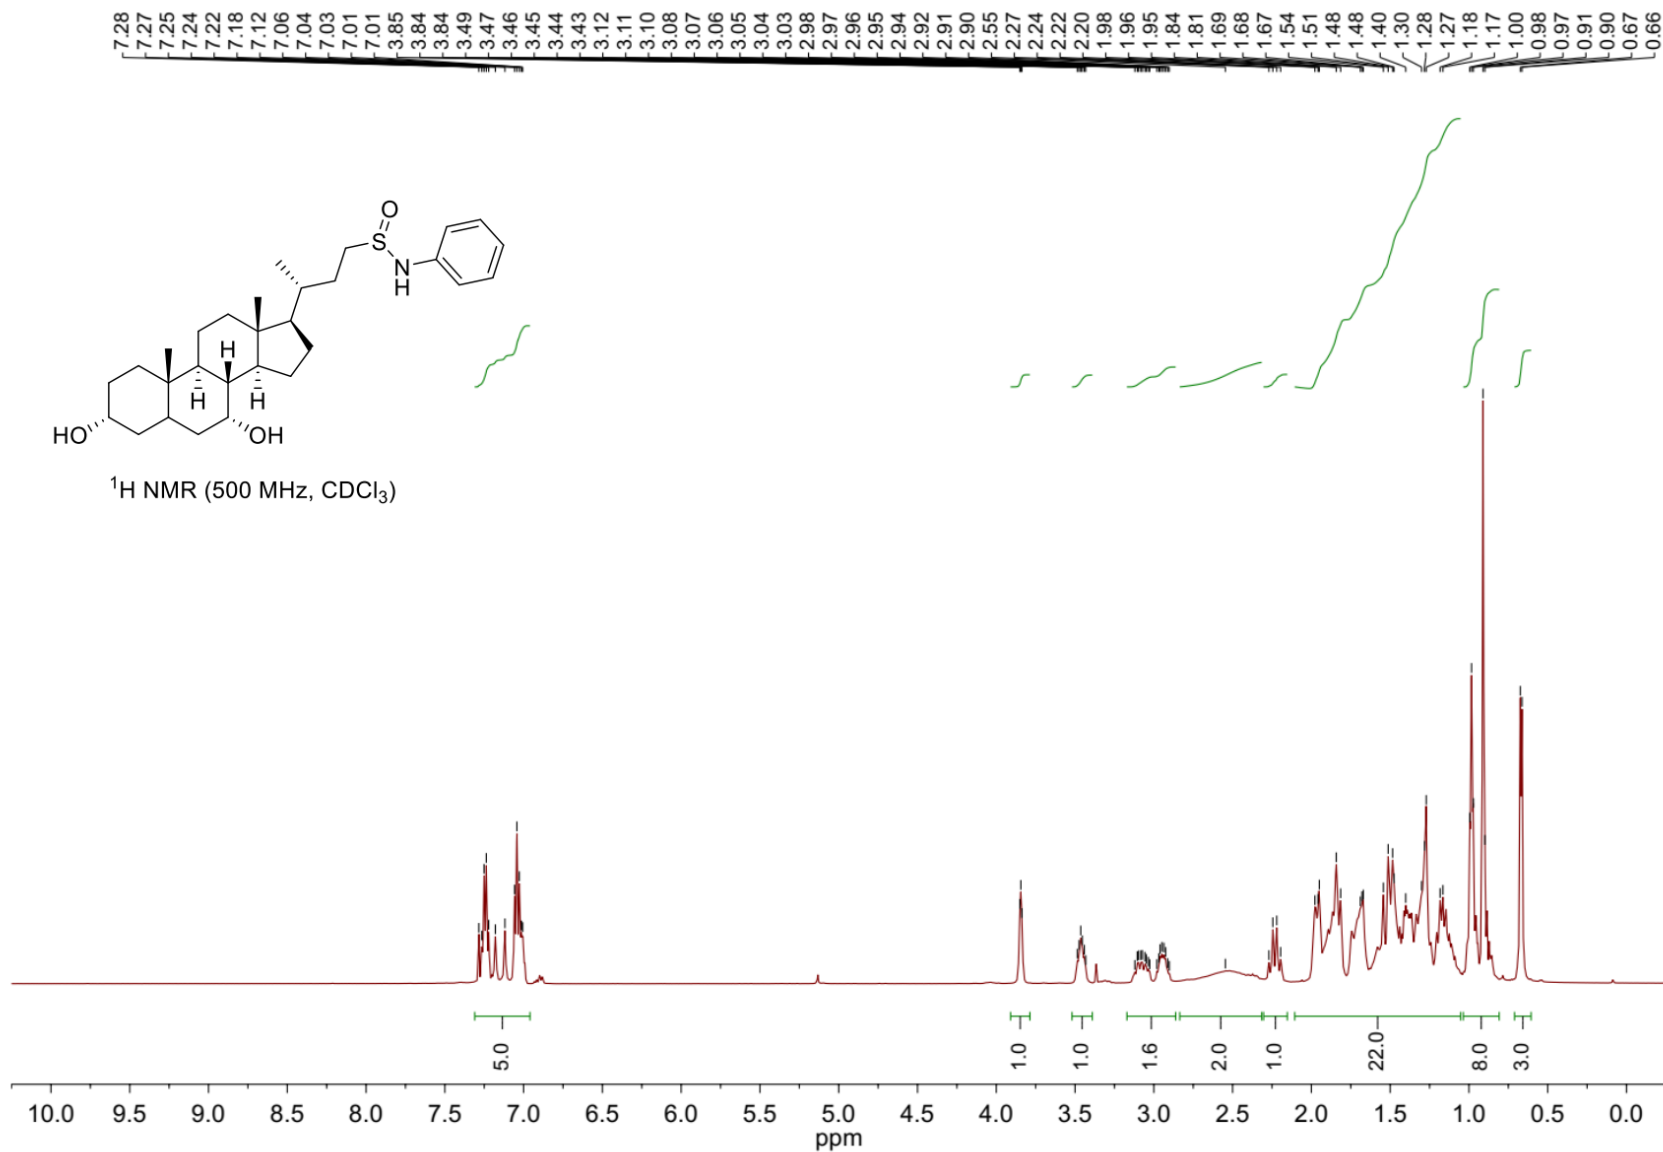

**(3R)-3-((3R,7R,8R,9S,10S,13R,14S,17R)-3,7-Dihydroxy-10,13-dimethylhexadecahydro-1H-cyclopenta[a]phenanthren-17-yl)-N-phenylbutane-1-sulfonamide (7m)**

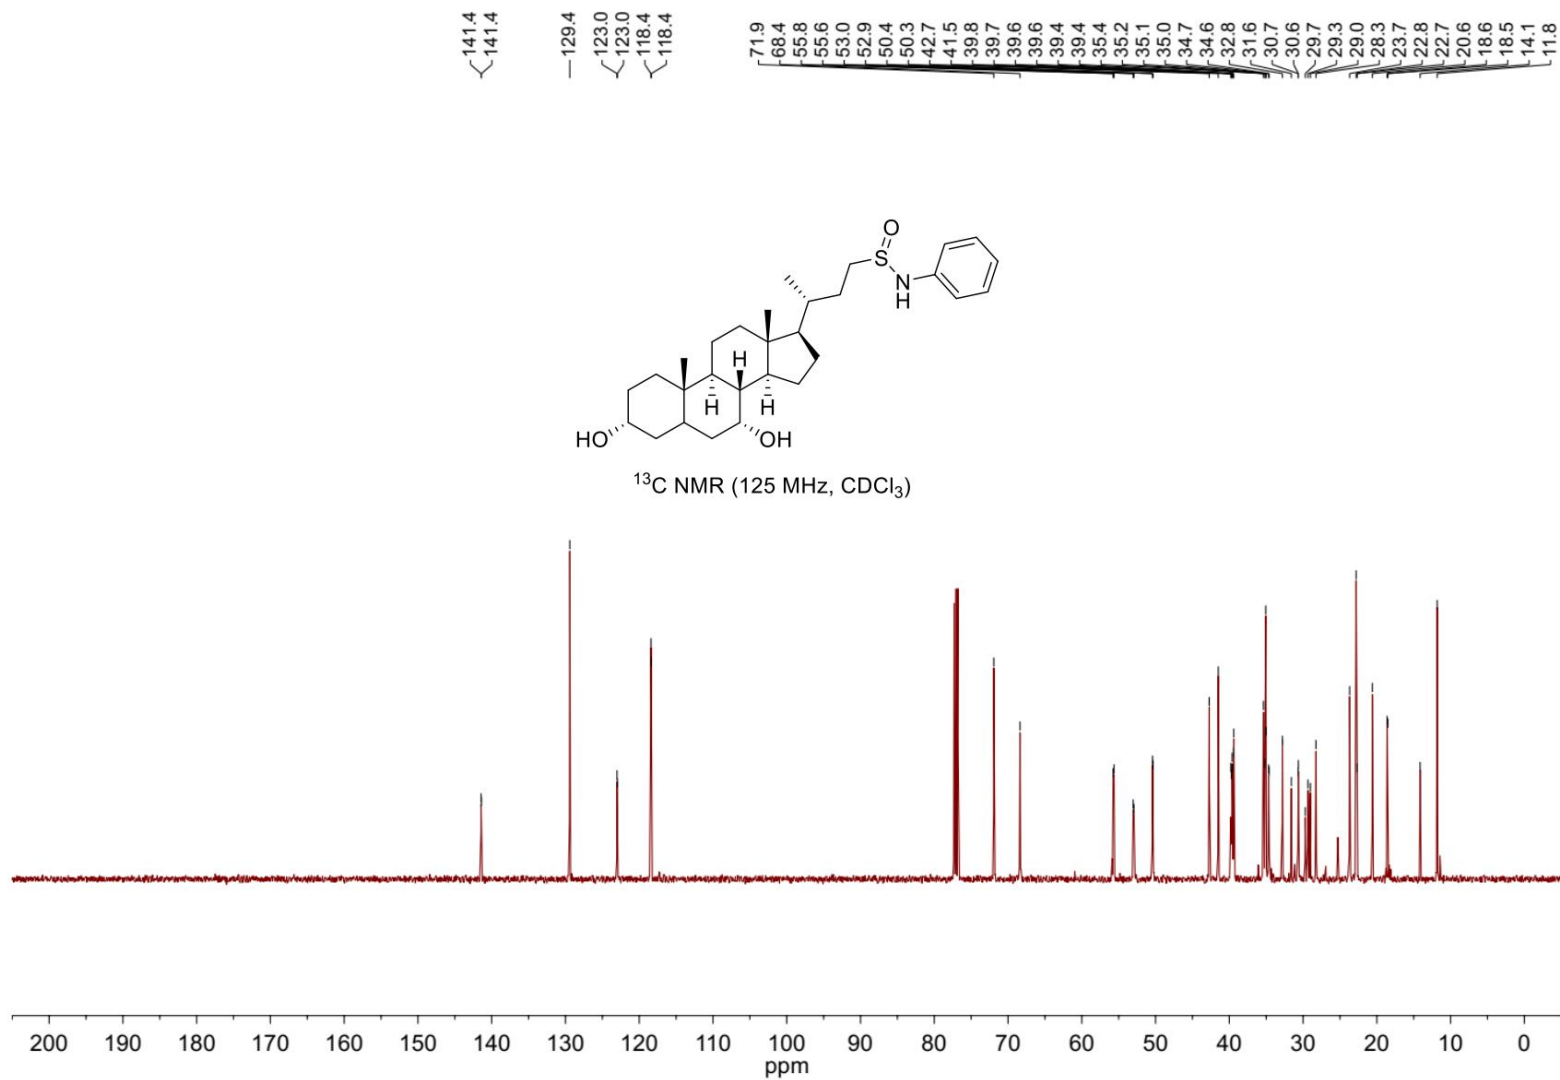

# 1-Cyclopropyl-N-phenylmethanesulfinamide (9) and N-phenylbut-3-ene-1-sulfinamide (9a)

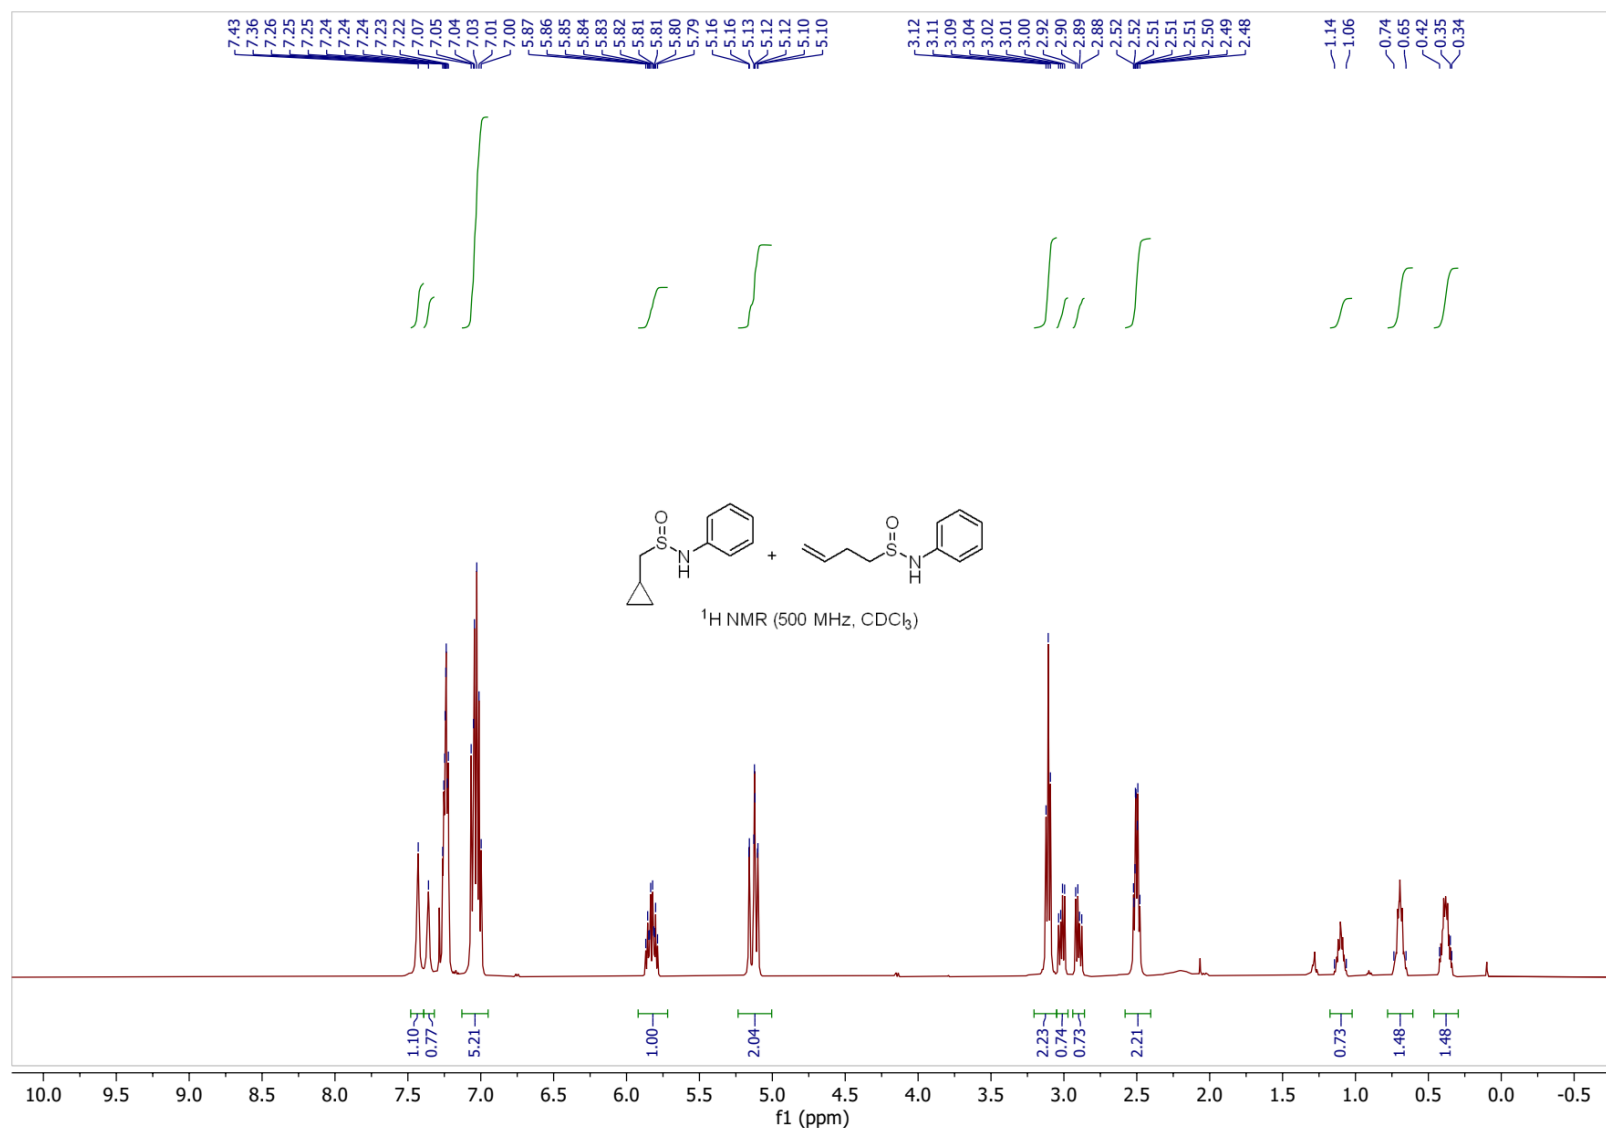

1-Cyclopropyl-*N*-phenylmethanesulfinamide (9) and *N*-phenylbut-3-ene-1-sulfinamide (9a)

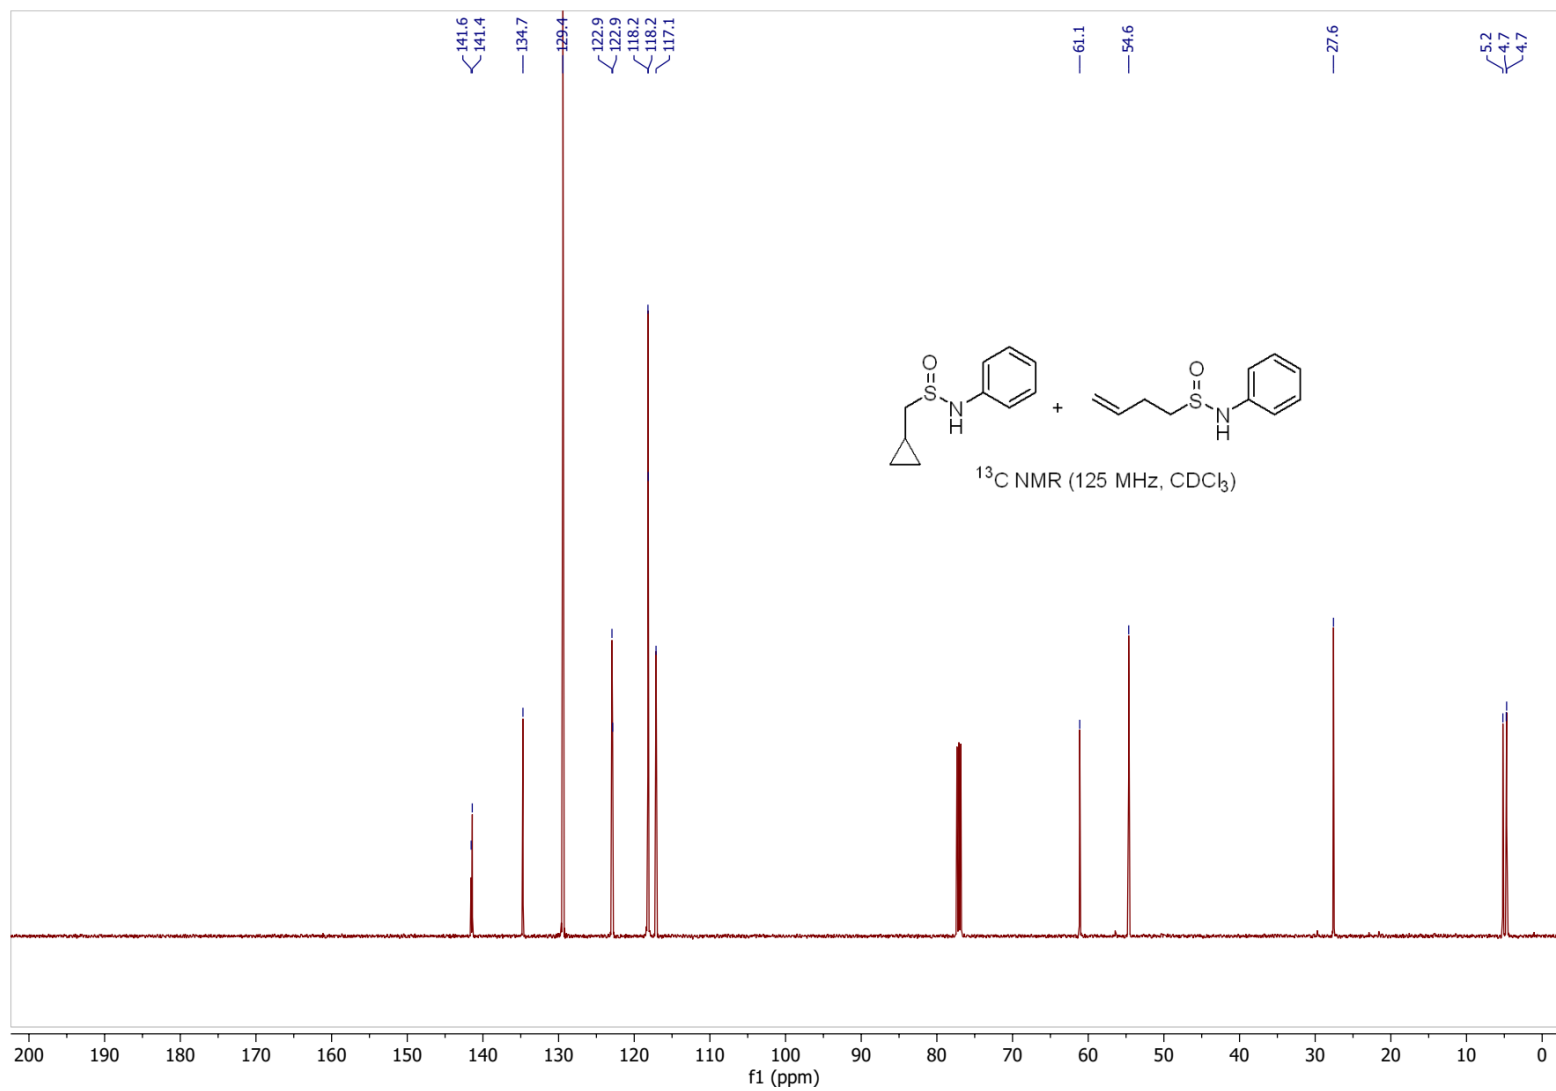

***N*-(4-chlorophenethyl)-2-methylpropane-1-sulfonamide (12a)**

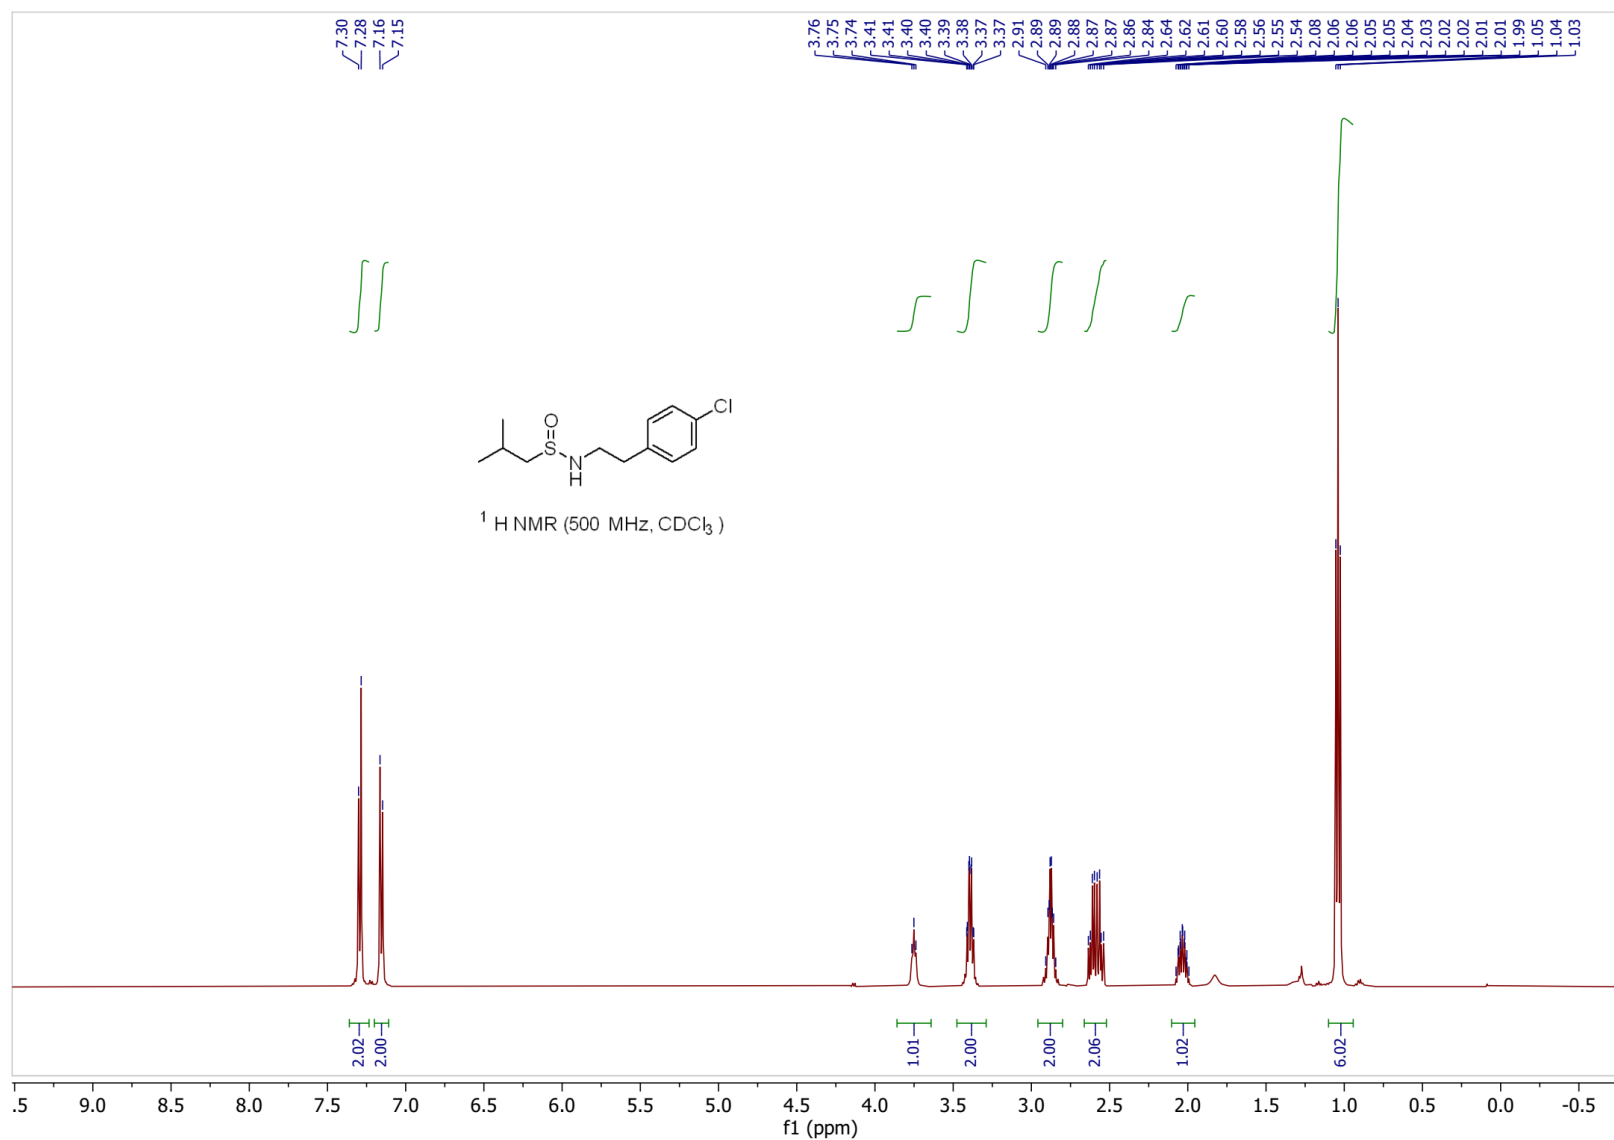

***N*-(4-chlorophenethyl)-2-methylpropane-1-sulfonamide (12a)**

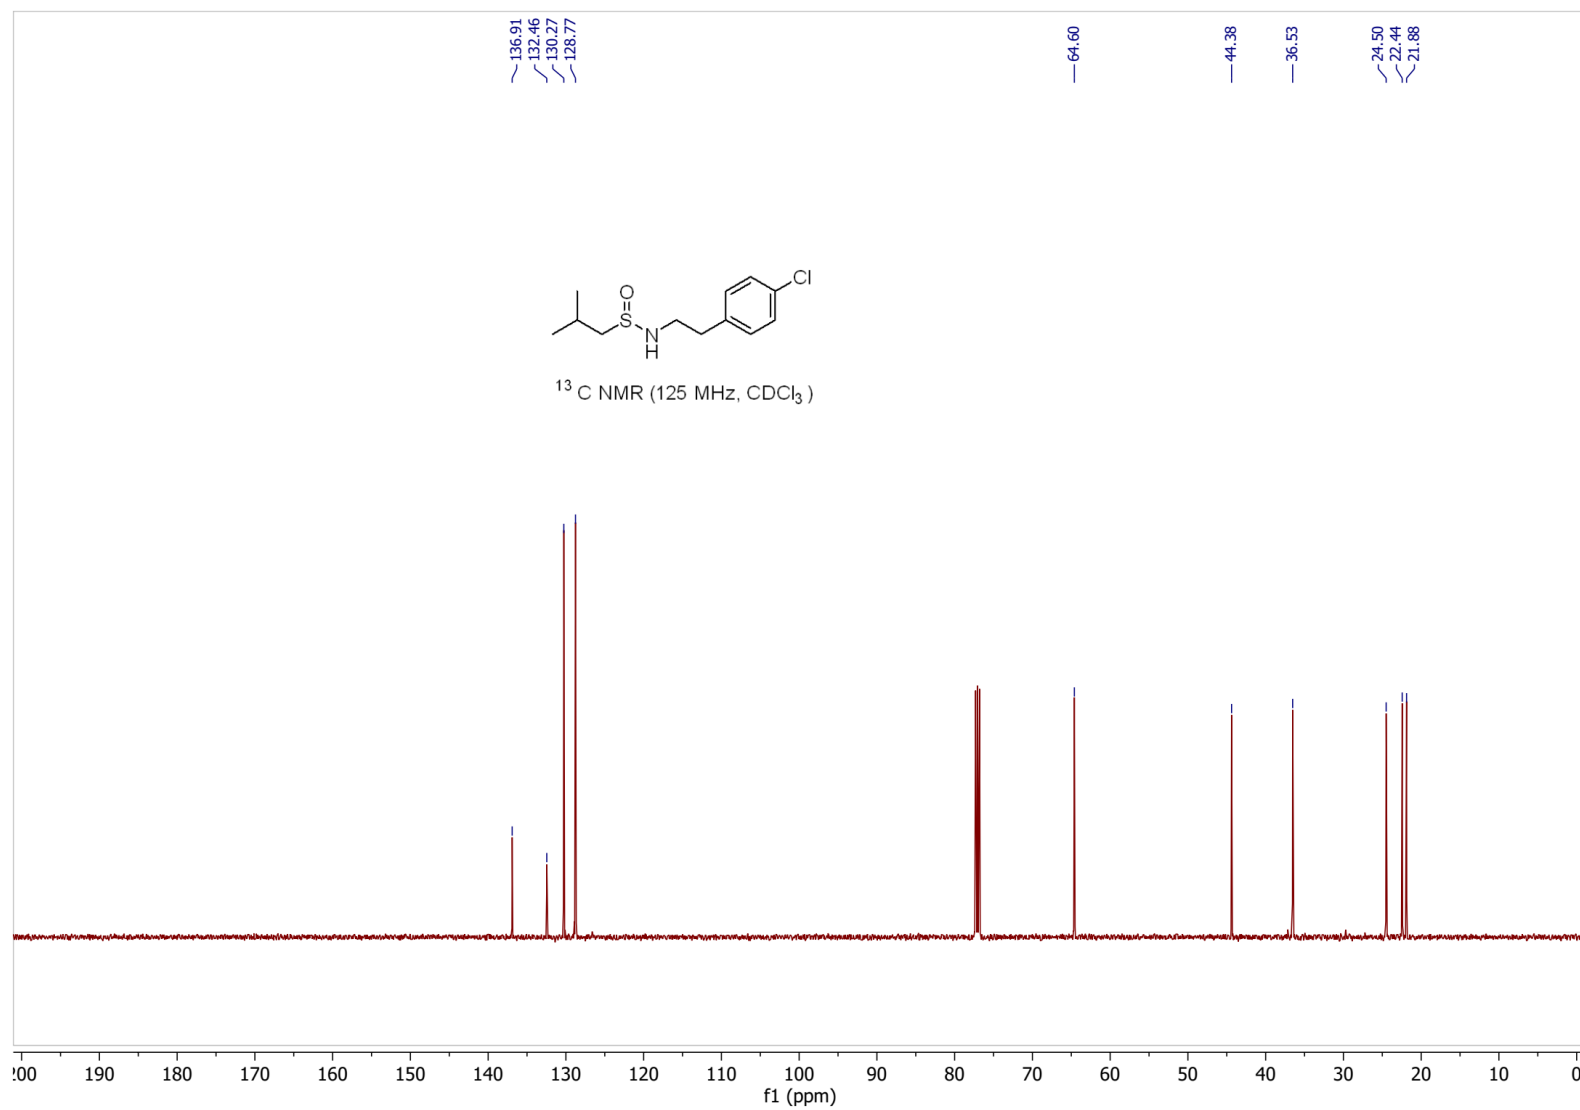

***N*-(3,5-difluorophenyl)-2-methylpropane-1-sulfinamide (12b)**

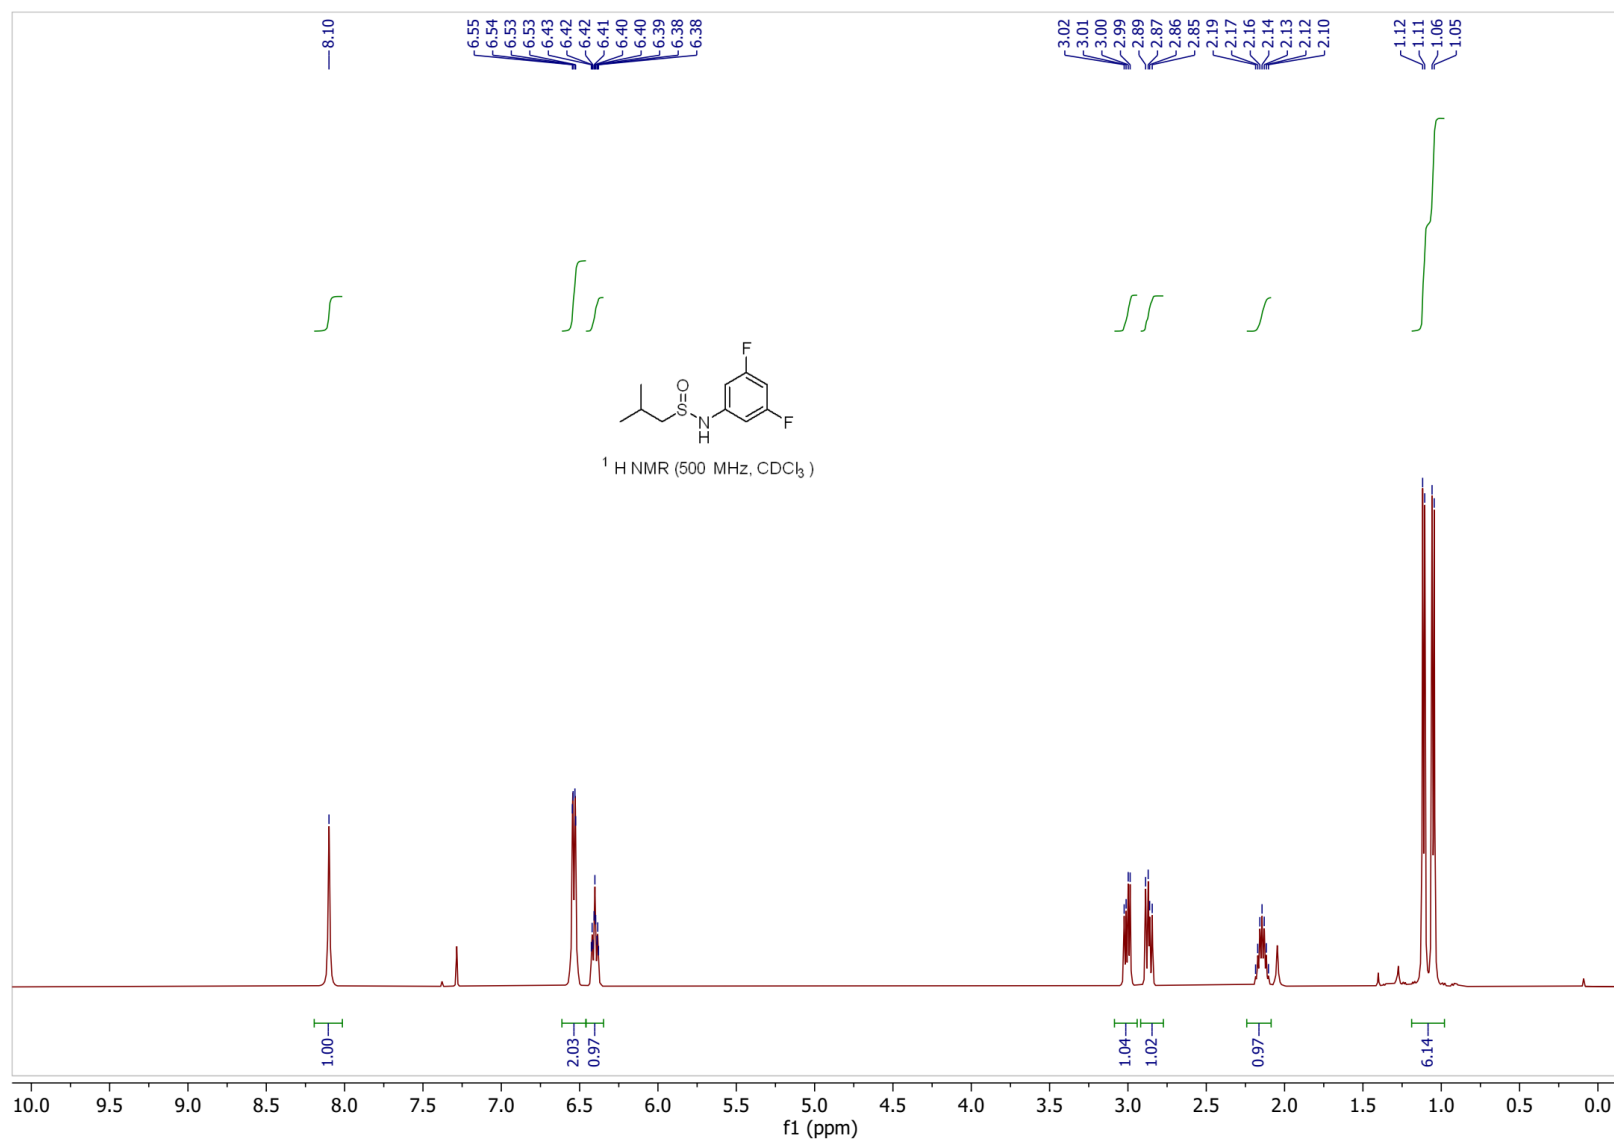



**N-(3,5-difluorophenyl)-2-methylpropane-1-sulfonamide (12b)**

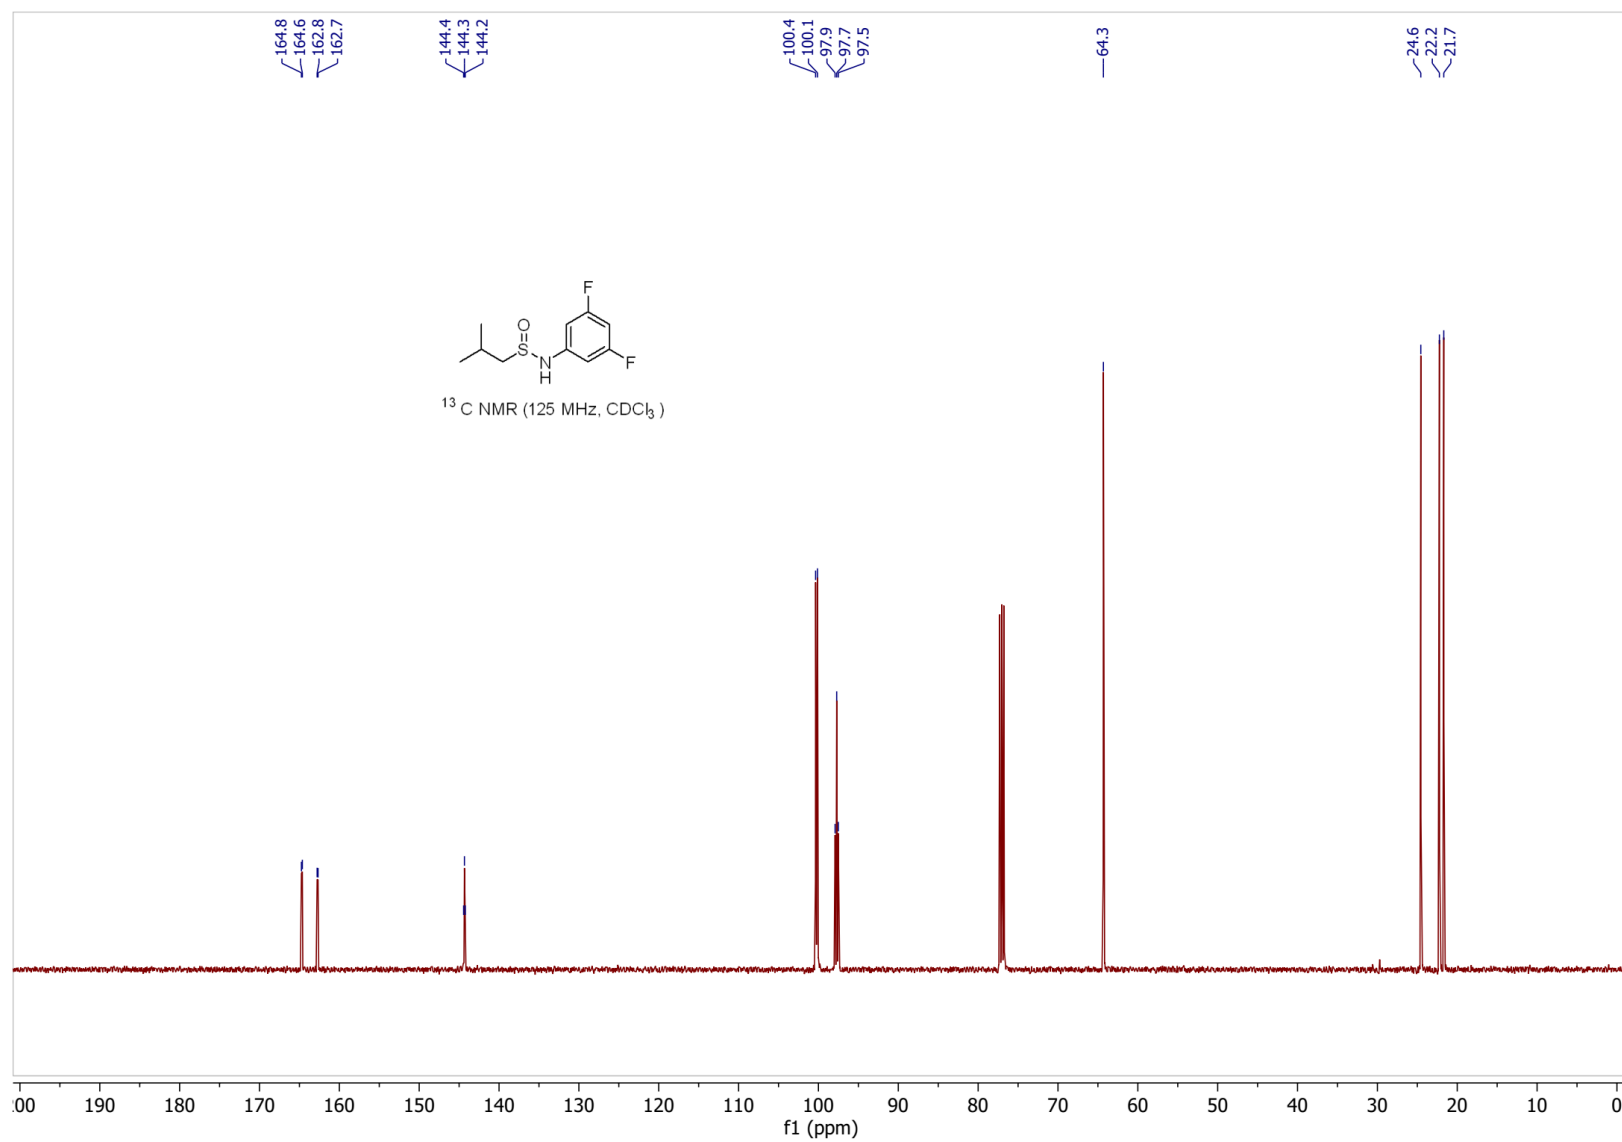

**N-(4-fluorophenethyl)ethanesulfonamide (12c)**

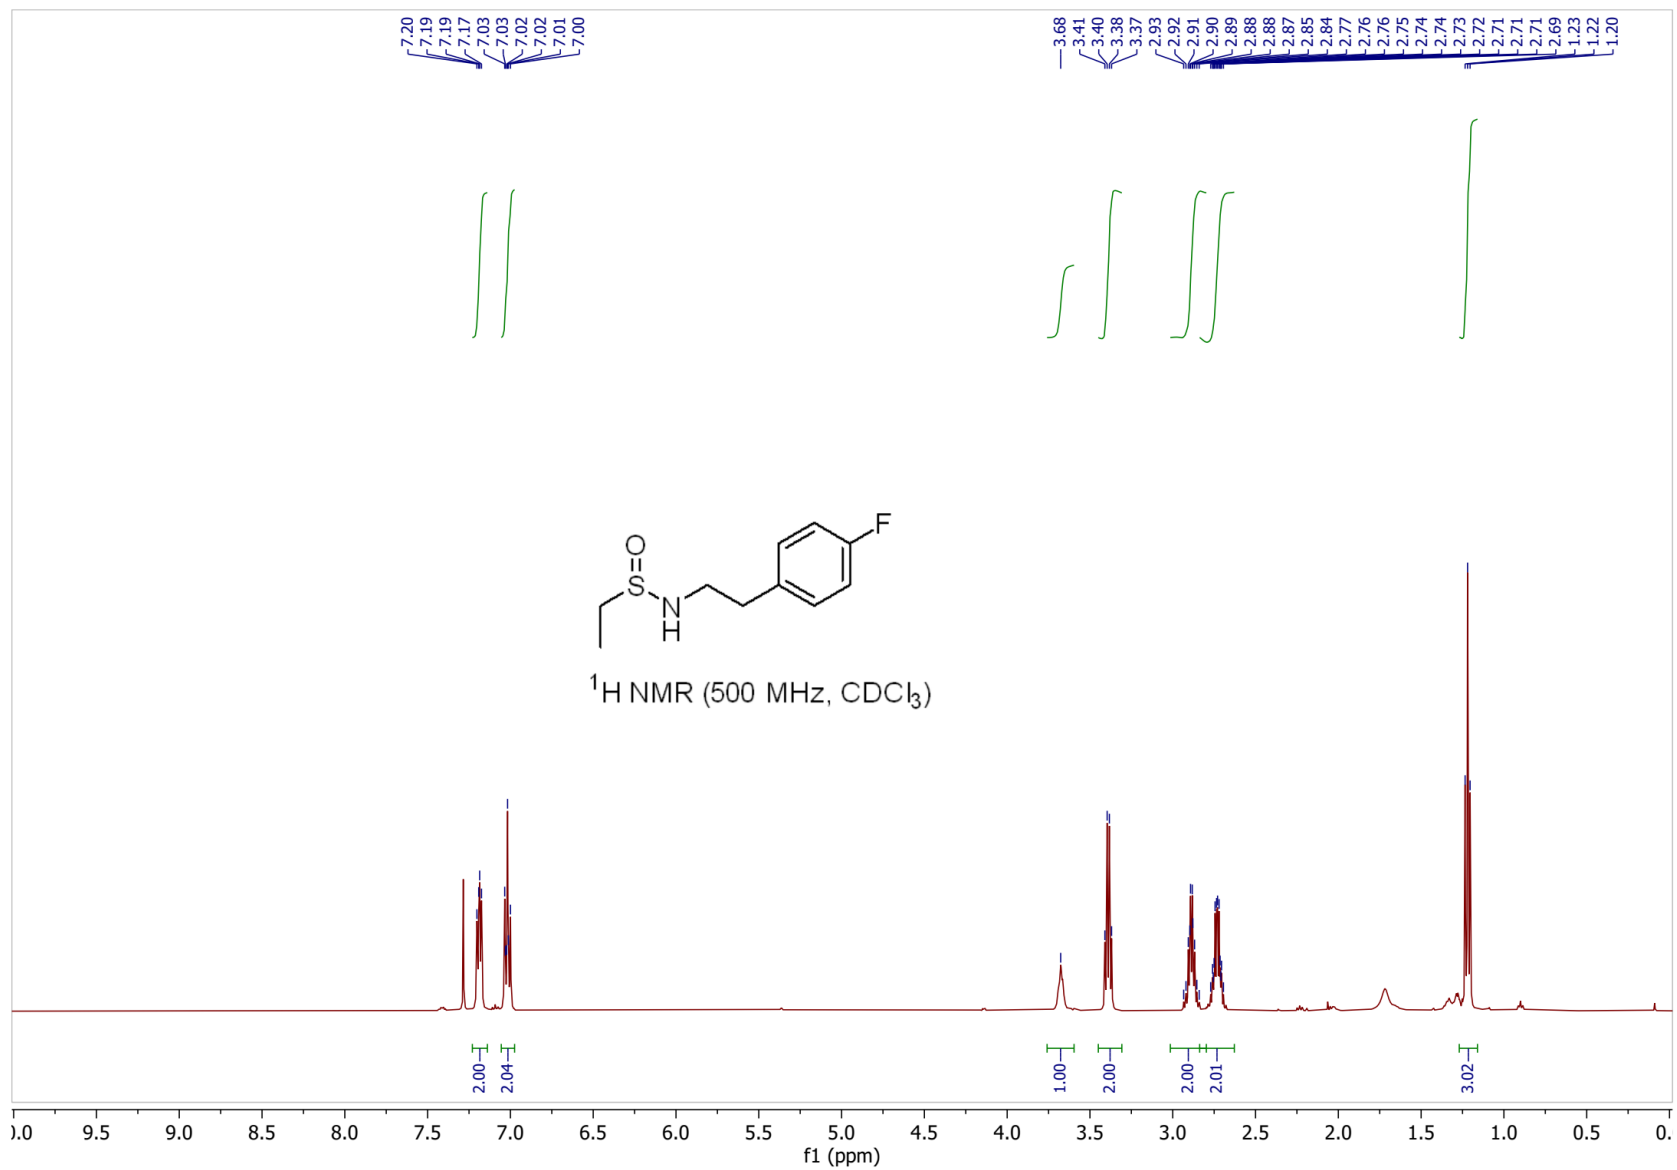

**N-(4-fluorophenethyl)ethanesulfinamide (12c)**

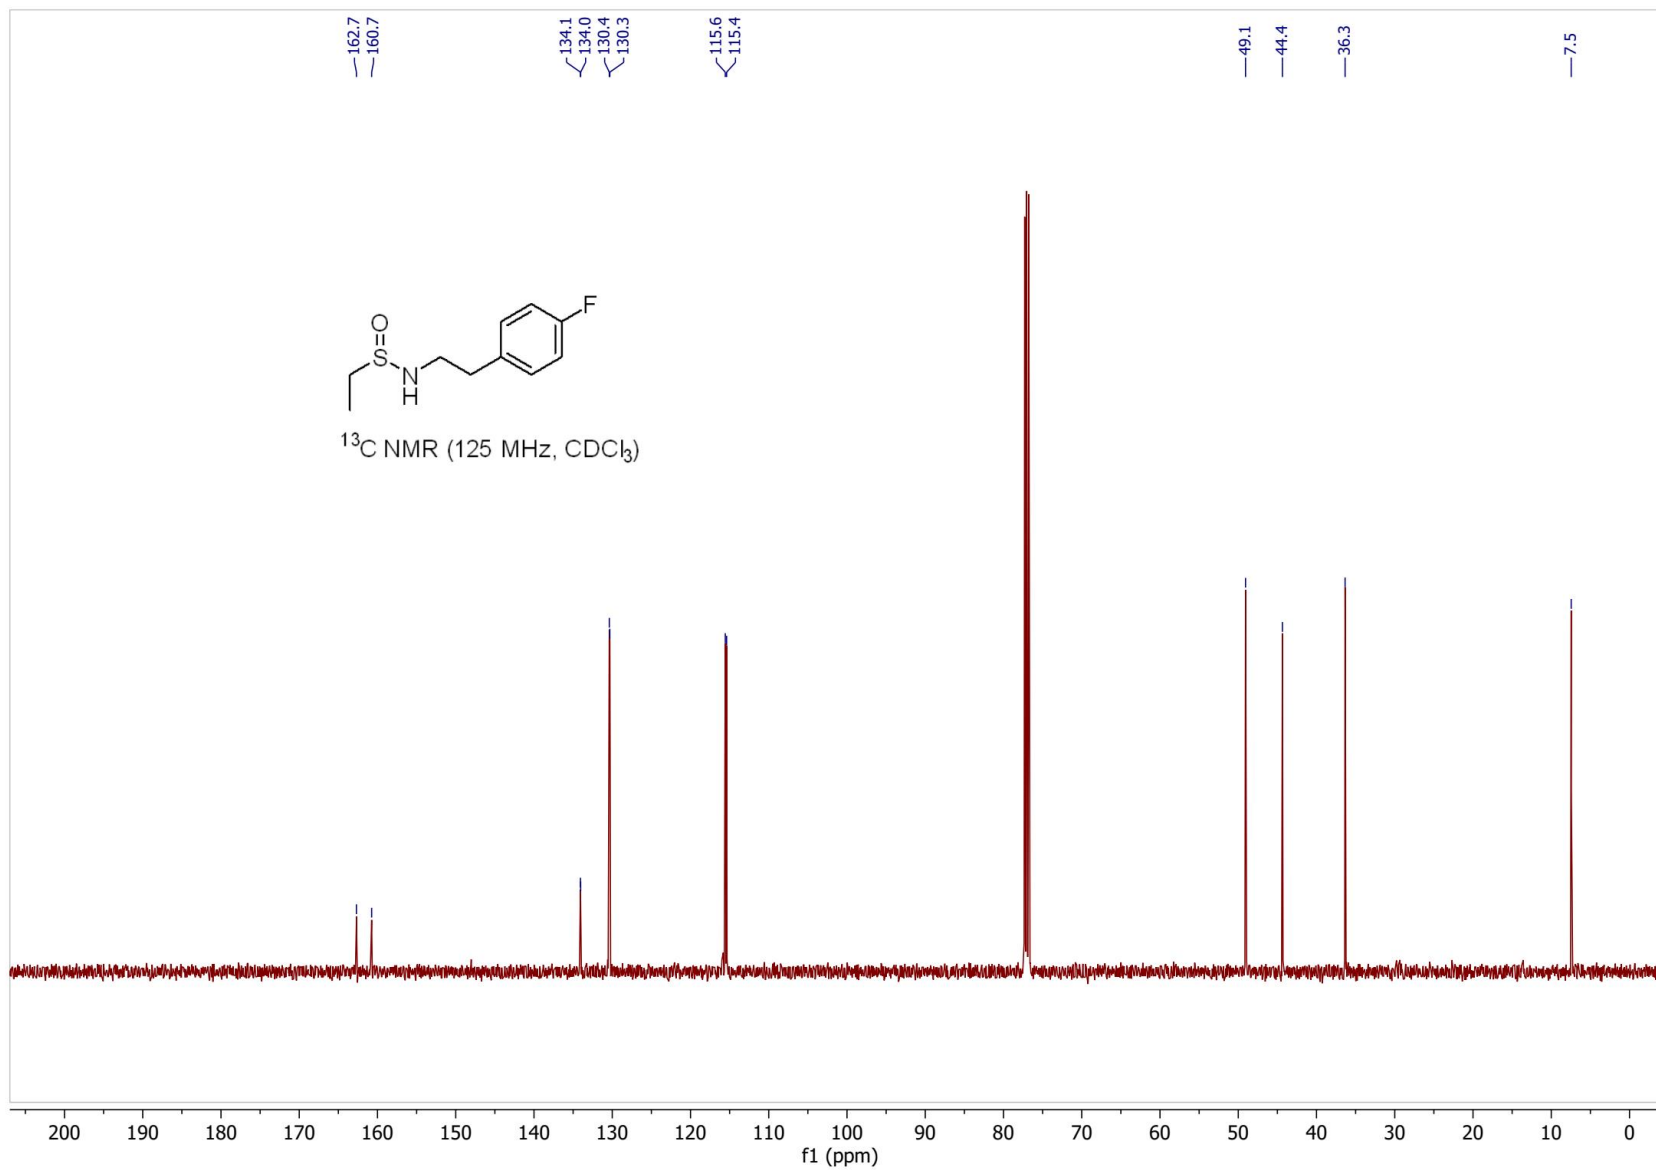

# Methyl 3-((isobutylsulfinyl)amino)thiophene-2-carboxylate (12d)

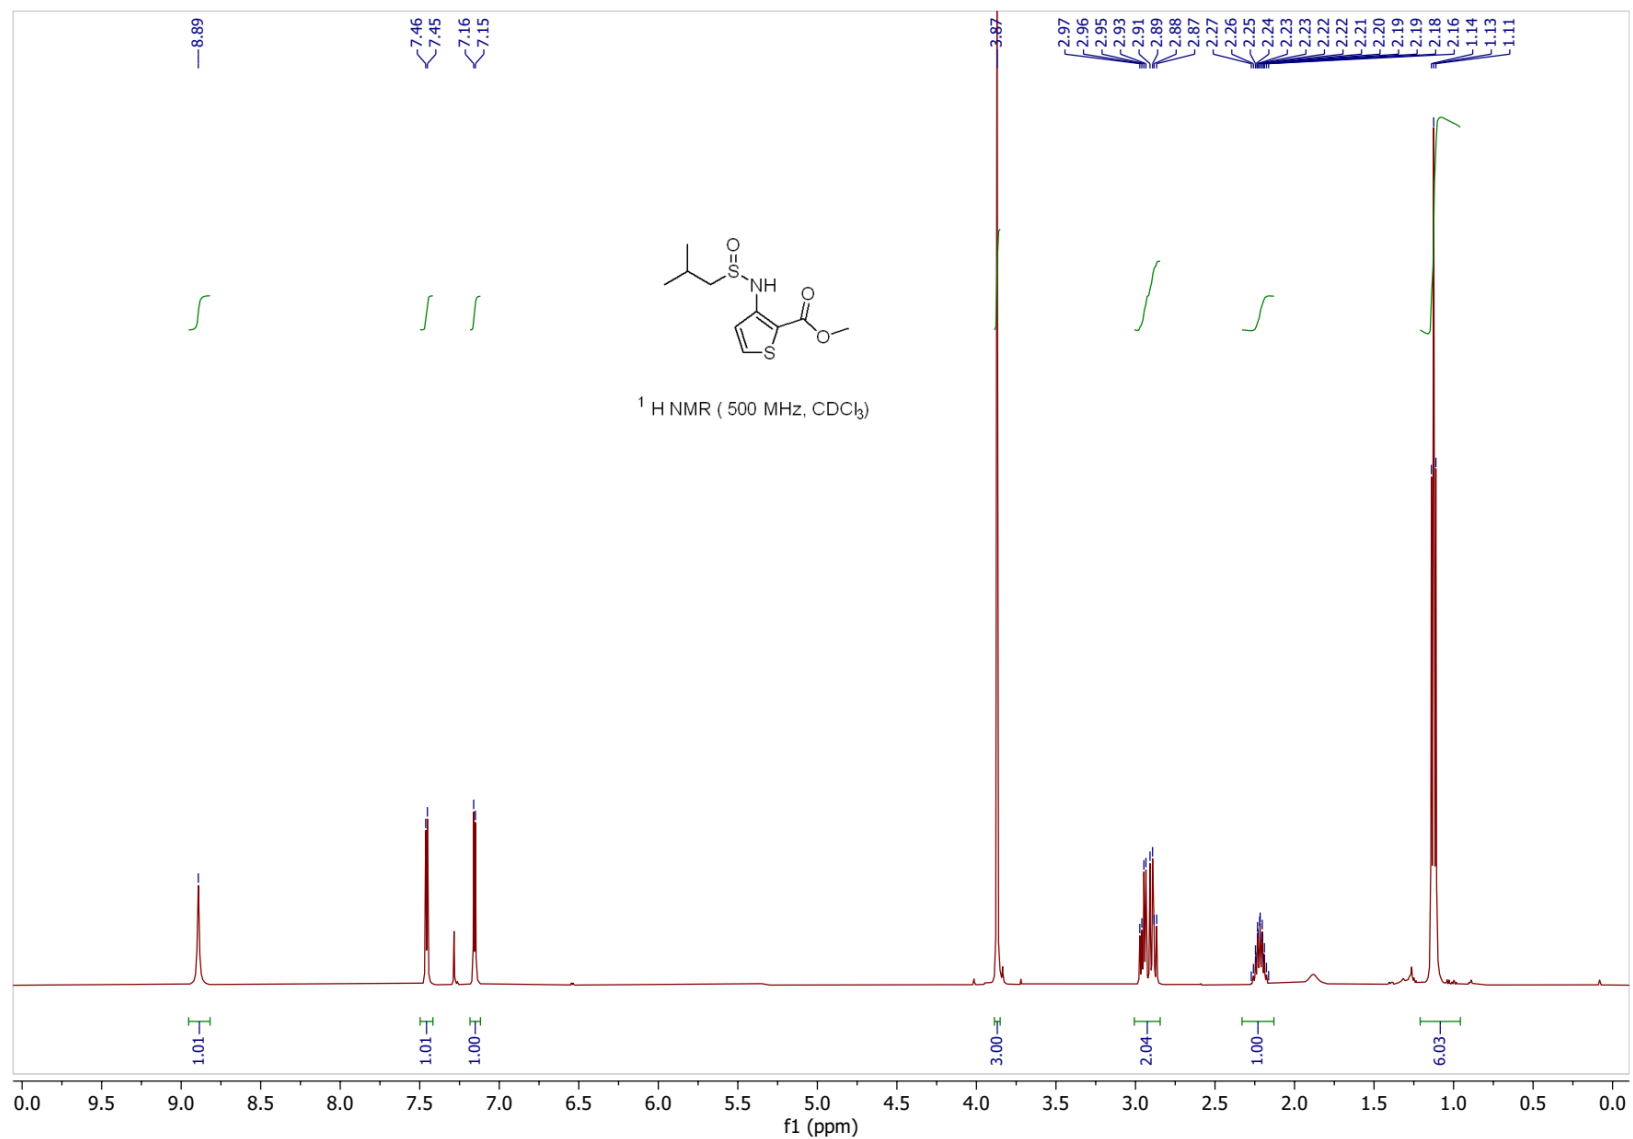

# Methyl 3-((isobutylsulfinyl)amino)thiophene-2-carboxylate (12d)

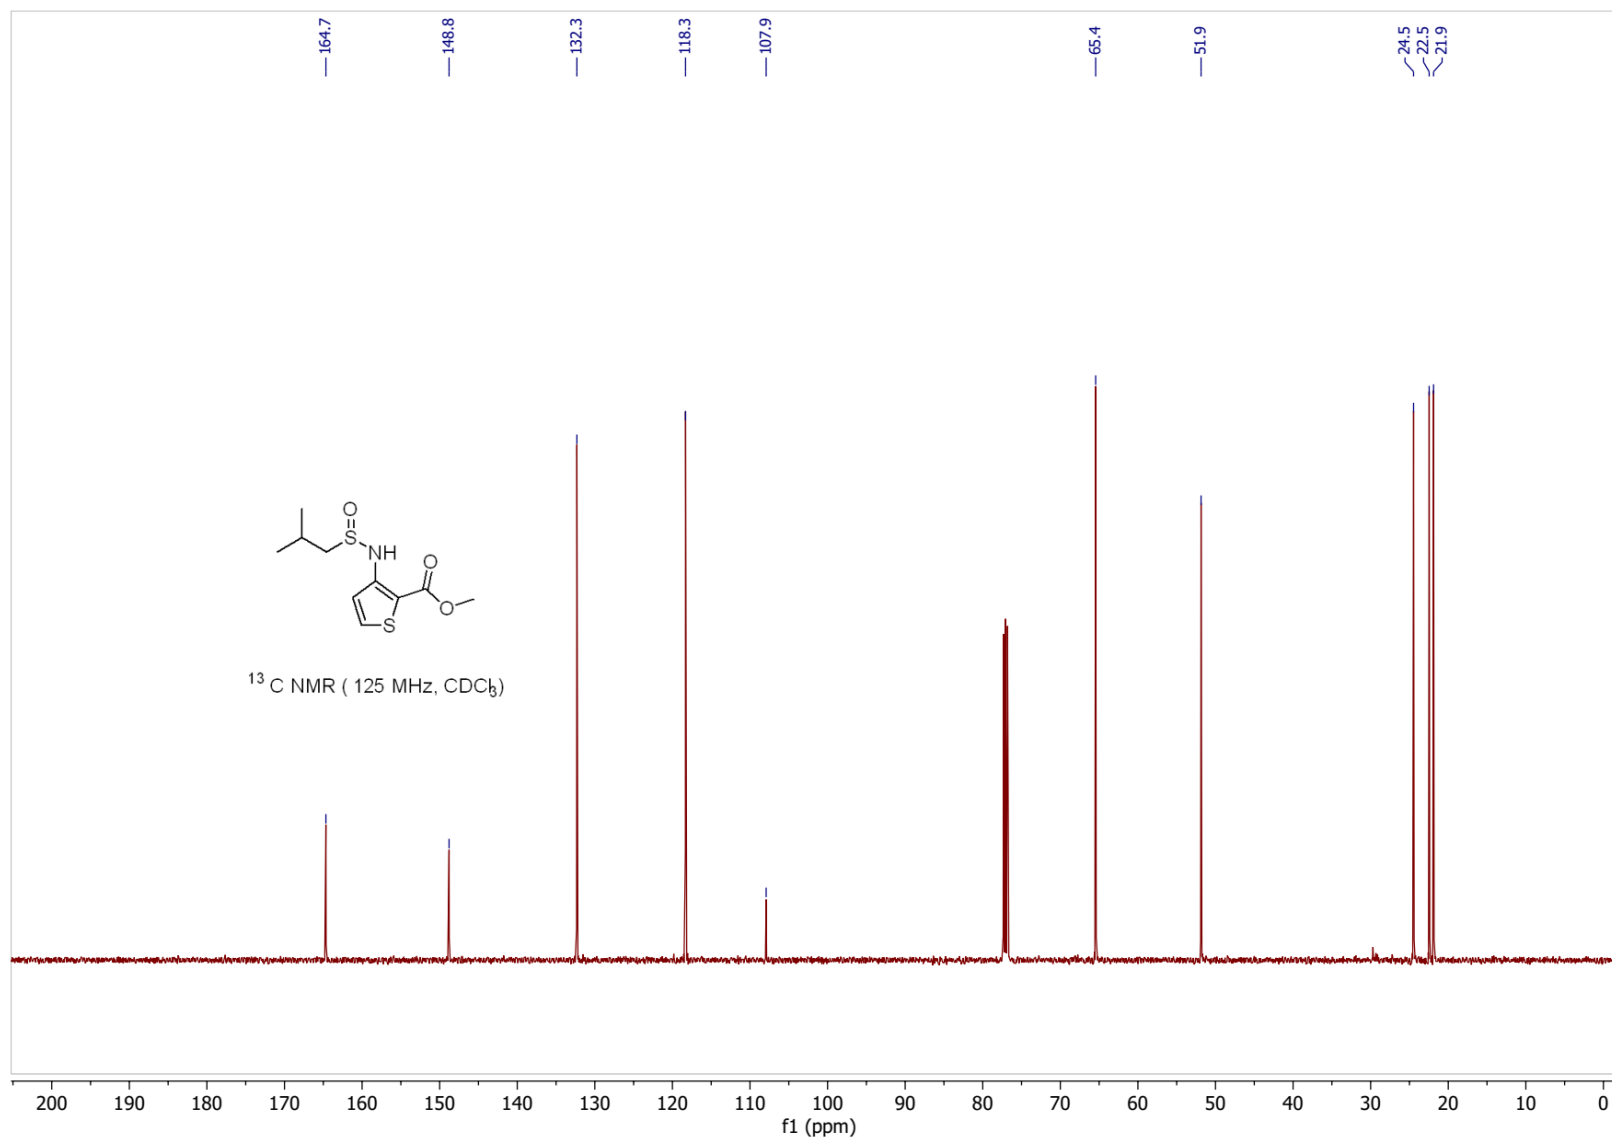

***N*-(3-bromo-4-methylphenyl)ethanesulfinamide (12e)**

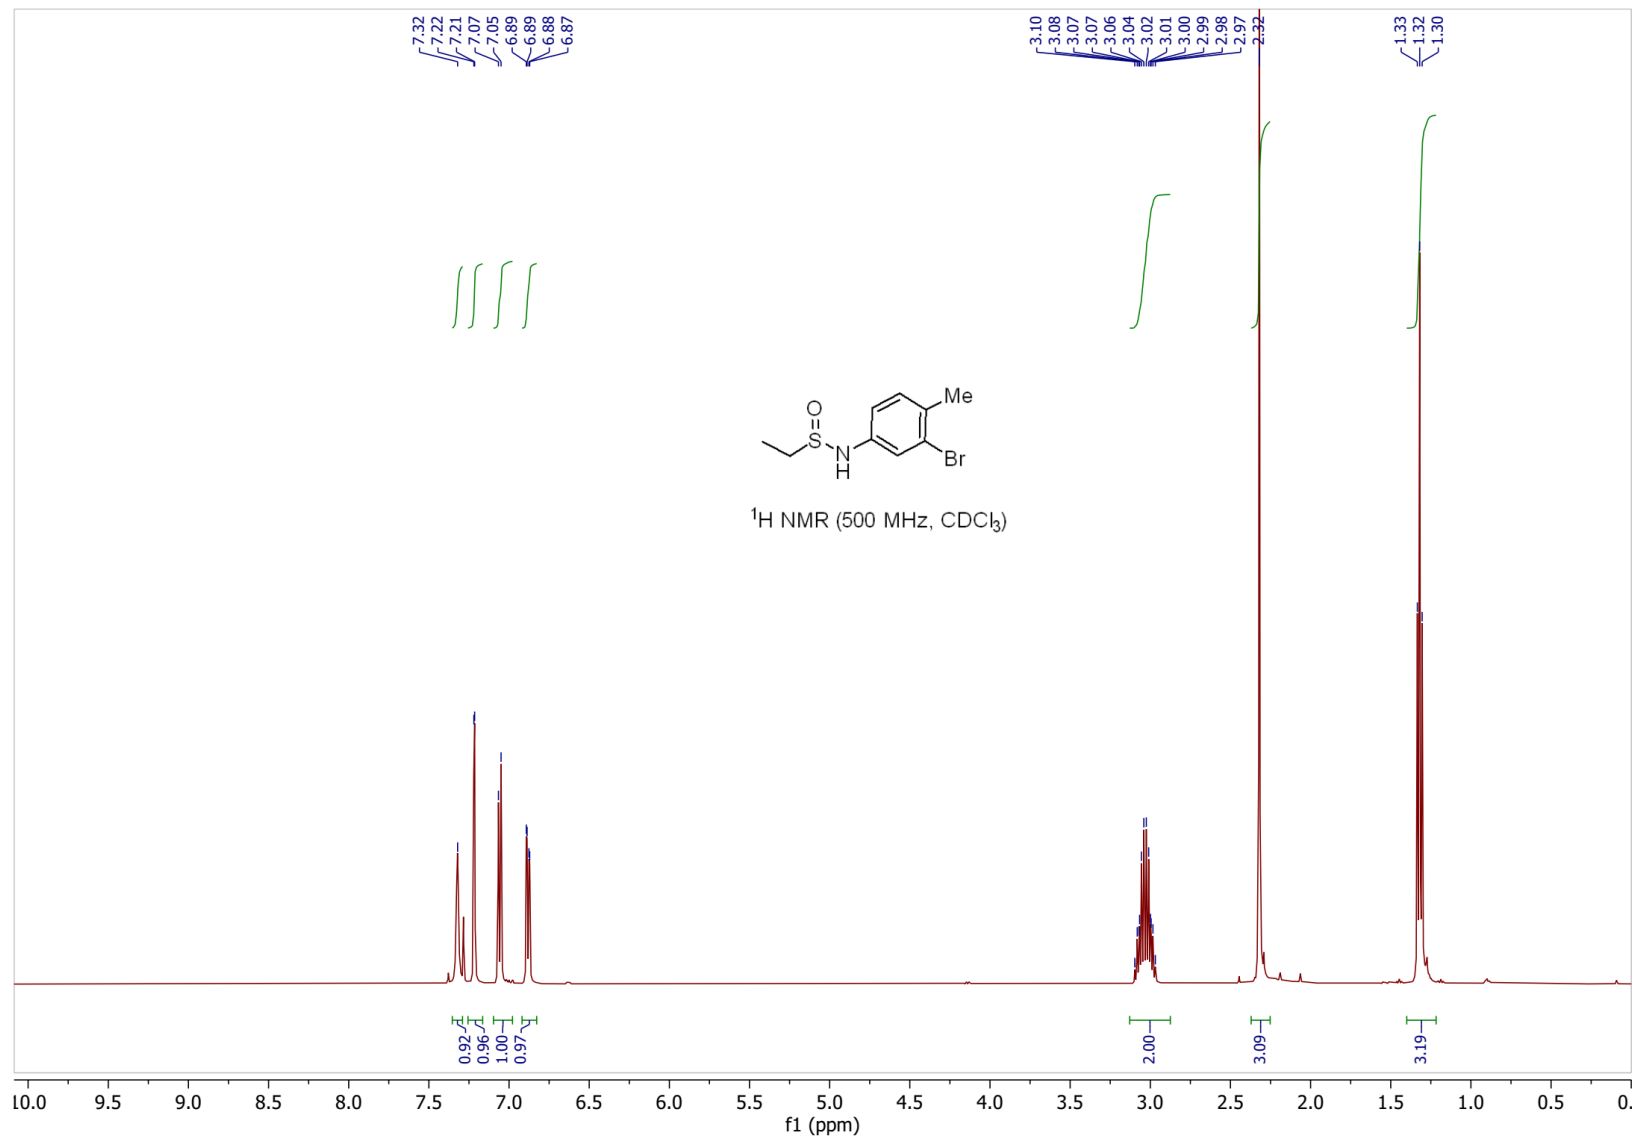

***N*-(3-bromo-4-methylphenyl)ethanesulfinamide (12e)**

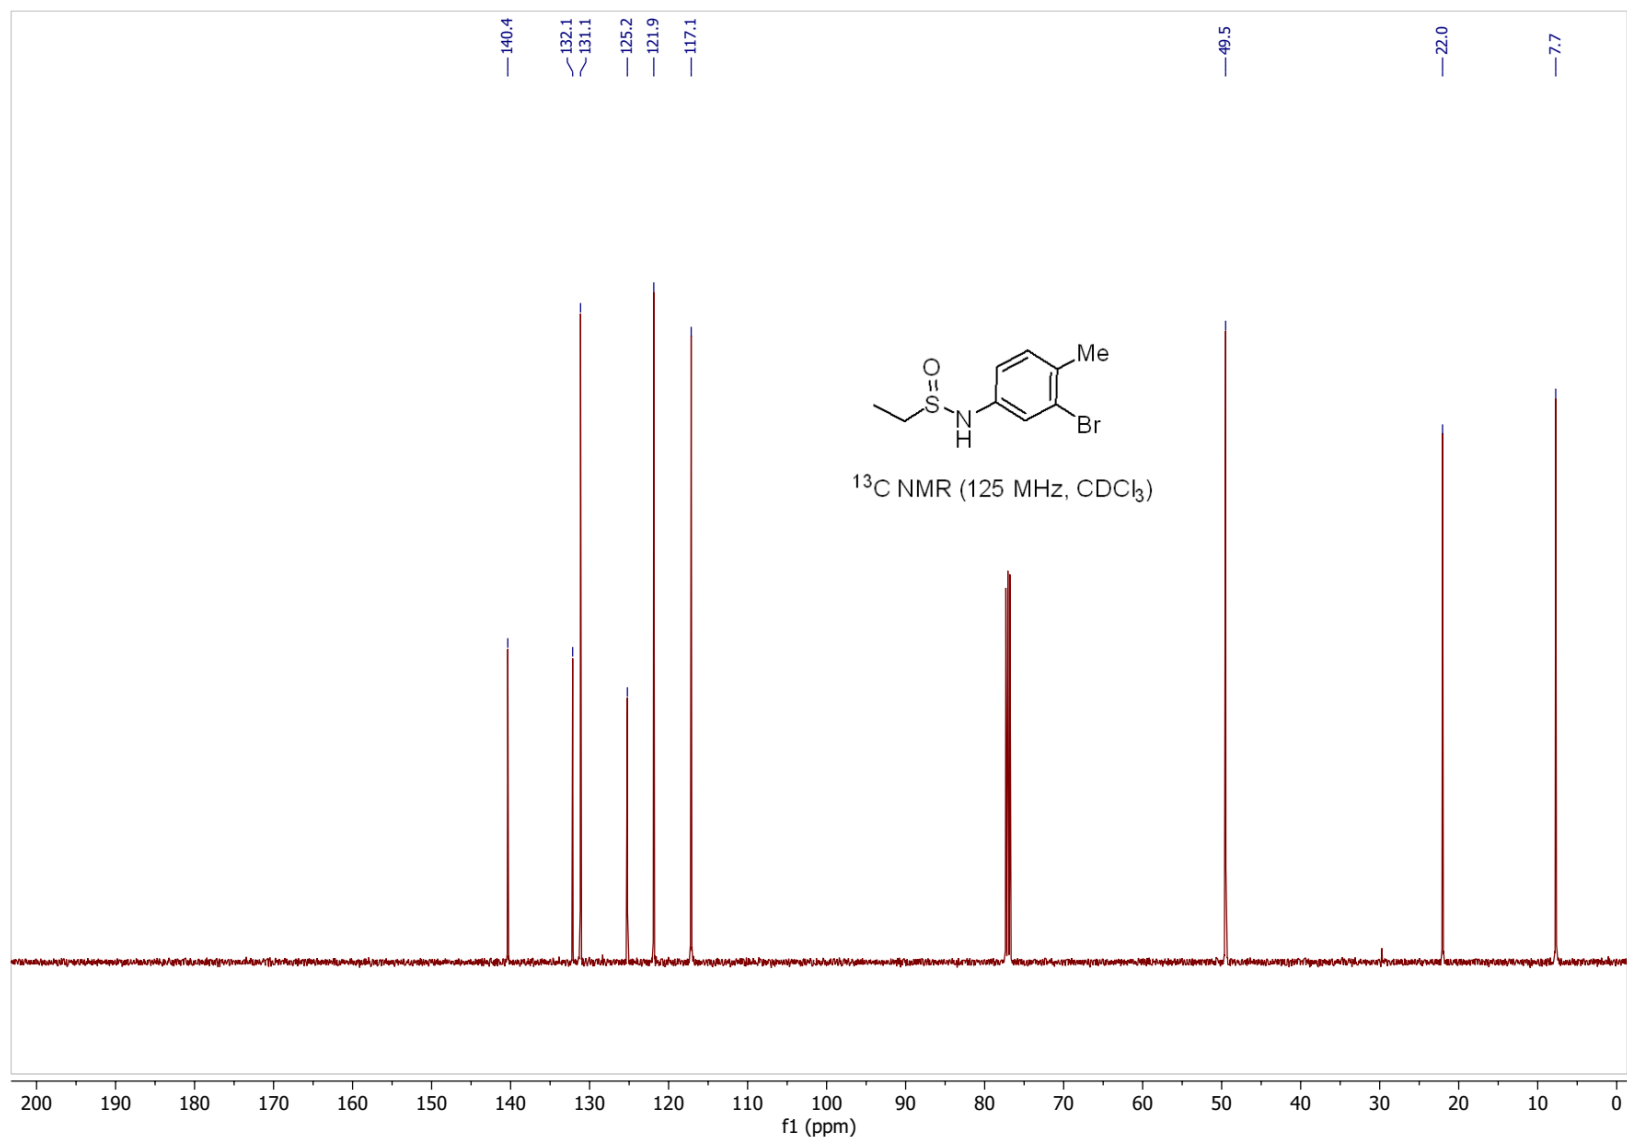

## References

1. M. Newcomb, N. Tanaka, A. Bouvier, C. Tronche, J. H. Horner, O. M. Musa, F. N. Martinez, *J. Am. Chem. Soc.* **1996**, *118*, 8505–8506.
2. F. A. Saito, *Angew. Chem. Int. Ed.* **2022**, *61*, e202213872.
3. L. Li, S. hang, Y. Chen, X. Cui, G. Zhao, Z. Tang, G. Li, *ACS Catal.* **2022**, *12*, 15334–15340.
4. M. Ding, Z. X. Zhang, T. Q. Davies, M. C. Willis, *Org. Lett.* **2022**, *24*, 1711–1715.
5. Gaussian 16, Revision A.03, M. J. Frisch, G. W. Trucks, H. B. Schlegel, G. E. Scuseria, M. A. Robb, J. R. Cheeseman, G. Scalmani, V. Barone, G. A. Petersson, H. Nakatsuji, X. Li, M. Caricato, A. V. Marenich, J. Bloino, B. G. Janesko, R. Gomperts, B. Mennucci, H. P. Hratchian, J. V. Ortiz, A. F. Izmaylov, J. L. Sonnenberg, D. Williams-Young, F. Ding, F. Lipparini, F. Egidi, J. Goings, B. Peng, A. Petrone, T. Henderson, D. Ranasinghe, V. G. Zakrzewski, J. Gao, N. Rega, G. Zheng, W. Liang, M. Hada, M. Ehara, K. Toyota, R. Fukuda, J. Hasegawa, M. Ishida, T. Nakajima, Y. Honda, O. Kitao, H. Nakai, T. Vreven, K. Throssell, J. A. Montgomery, Jr., J. E. Peralta, F. Ogliaro, M. J. Bearpark, J. J. Heyd, E. N. Brothers, K. N. Kudin, V. N. Staroverov, T. A. Keith, R. Kobayashi, J. Normand, K. Raghavachari, A. P. Rendell, J. C. Burant, S. S. Iyengar, J. Tomasi, M. Cossi, J. M. Millam, M. Klene, C. Adamo, R. Cammi, J. W. Ochterski, R. L. Martin, K. Morokuma, O. Farkas, J. B. Foresman and D. J. Fox, Gaussian, Inc., Wallingford CT, **2016**.
6. S. Grimme, C. Bannwarth, P. Shushkov, *J Chem. Theory Comput.* **2017**, *13*, 1989–2009.
7. Y. Shao, Z. Gan, E. Epifanovsky, A. T. B. Gilbert, M. Wormit, J. Kussmann, A. W. Lange, A. Behn, J. Deng, X. Feng, D. Ghosh, M. Goldey, P. R. Horn, L. D. Jacobson, I. Kaliman, R. Z. Khaliullin, T. Kuś, A. Landau, J. Liu, E. I. Proynov, Y. M. Rhee, R. M. Richard, M. A. Rohrdanz, R. P. Steele, E. J. Sundstrom, H. L. Woodcock, P. M. Zimmerman, D. Zuev, B. Albrecht, E. Alguire, B. Austin, G. J. O. Beran, Y. a. Bernard, E. Berquist, K. Brandhorst, K. B. Bravaya, S. T. Brown, D. Casanova, C.-M. Chang, Y. Chen, S. H. Chien, K. D. Closser, D. L. Crittenden, M. Diedenhofen, R. A. DiStasio, H. Do, A. D. Dutoi, R. G. Edgar, S. Fatehi, L. Fusti-Molnar, A. Ghysels, A. Golubeva-Zadorozhnaya, J. Gomes, M. W. D. Hanson-Heine, P. H. P. Harbach, A. W. Hauser, E. G. Hohenstein, Z. C. Holden, T.-C. Jagau, H. Ji, B. Kaduk, K. Khistyayev, J. Kim, J. Kim, R. A. King, P. Klunzinger, D. Kosenkov, T. Kowalczyk, C. M. Krauter, K. U. Lao, A. D. Laurent, K. V. Lawler, S. V. Levchenko, C. Y. Lin, F. Liu, E. Livshits, R. C. Lochan, A. Luenser, P. Manohar, S. F. Manzer, S.-P. Mao, N. Mardirossian, A. V. Marenich, S. A. Maurer, N. J. Mayhall, E. Neuscammann, C. M. Oana, R. Olivares-Amaya, D. P. O'Neill, J. A. Parkhill, T. M. Perrine, R. Peverati, A. Prociuk, D. R. Rehn, E. Rosta, N. J. Russ, S. M. Sharada, S. Sharma, D. W. Small, A. Sodt, T. Stein, D. Stück, Y.-C. Su, A. J. W. Thom, T. Tsuchimochi, V. Vanovschi, L. Vogt, O. Vydrov, T. Wang, M. A. Watson, J. Wenzel, A. White, C. F. Williams, J. Yang, S. Yeganeh, S. R. Yost, Z.-Q. You, I. Y. Zhang, X. Zhang, Y. Zhao, B. R. Brooks, G. K. L. Chan, D. M. Chipman, C. J. Cramer, W. A. Goddard, M. S. Gordon, W. J. Hehre, A. Klamt, H. F. Schaefer, M. W. Schmidt, C. D. Sherrill, D. G. Truhlar, A. Warshel, X. Xu, A. Aspuru-Guzik, R. Baer, A. T. Bell, N. A. Besley, J.-D. Chai, A. Dreuw, B. D. Dunietz, T. R. Furlani, S. R. Gwaltney, C.-P. Hsu, Y. Jung, J. Kong, D. S. Lambrecht, W. Liang, C. Ochsenfeld, V. A. Rassolov, L. V. Slipchenko, J. E. Subotnik, T. Van Voorhis, J. M. Herbert, A. I. Krylov, P. M. W. Gill, M. Head-Gordon, *Mol. Phys.* **2015**, *113*, 184–215.
8. CYLview, 1.0b, C. Y. Legault, Université de Sherbrooke, **2009** (<http://www.cylview.org>).
9. W. Humphrey, A. Dalke, K. Schulten, *J. Molec. Graphics* **1996**, *14*, 33–38.
10. T. Lu, F. Chen, *J. Comput. Chem.* **2012**, *33*, 580–592.



11. Chemcraft - graphical software for visualization of quantum chemistry computations.  
<https://www.chemcraftprog.com>.
12. H. S. Yu, X. He, S. L. Li, D. G. Truhlar, *Chem. Sci.* **2016**, *7*, 5032–5051.
13. A. Schaefer, C. Huber, and R. Ahlrichs, *J. Chem. Phys.* **1994**, *100*, 5829–5835.
14. A. V. Marenich, C. J. Cramer, D. G. Truhlar, *J. Phys. Chem. B* **2009**, *113*, 6378–6396.
15. G. Luchini, J. V. Alegre-Requena, Y. Guan, I. Funes-Ardoiz and R. S. Paton, GoodVibes: GoodVibes, 2019, v3.0.1.
16. Y. Zhao and D. G. Truhlar, *J. Phys. Chem. A* **2005**, *109*, 5656.
17. S. Grimme, J. Antony, S. Ehrlich and H. Krieg, *J. Chem. Phys.* **2010**, *132*, 154104.
18. A. Hellweg, D. Rappoport, *Phys. Chem. Chem. Phys.* **2015**, *17*, 1010–1017.
19. B. P. Pritchard, D. Altarawy, B. Didier, T. D. Gibson, T. L. Windus, *J. Chem. Inf. Model.* **2019**, *59*, 4814–4820.
20. F. M. Bickelhaupt, K. N. Houk, *Angew. Chem., Int. Ed.*, **2017**, *56*, 10070–10086.
21. V. D. Nguyen, G. C. Haug, S. G. Greco, R. Trevino, G. B. Karki, H. D. Arman, O. V. Larionov, *Angew. Chem., Int. Ed.*, **2022**, *61*, 1–9.
22. R. Z. Khaliullin, E. A. Cobar, R. C. Lochan, A. T. Bell, M. Head-Gordon, *J. Phys. Chem. A* **2007**, *111*, 8753–8765.
23. S. Jin, G. C. Haug, R. Trevino, V. D. Nguyen, H. D. Arman, O. V. Larionov, *Chem. Sci.* **2021**, *12*, 13914–13921.
24. V. T. Nguyen, G. C. Haug, V. D. Nguyen, N. T. H. Vuong, G. B. Karki, H. D. Arman, O. V. Larionov, *Chem. Sci.* **2022**, *13*, 4170–4179.
25. <https://github.com/patonlab/DBSTEP/tree/master>
26. F. Pedregosa, G. Varoquaux, A. Gramfort, V. Michel, B. Thirion, O. Grisel, M. Blondel, P. Prettenhofer, R. Weiss, V. Dubourg, J. Vanderplas, A. Passos, D. Cournapeau, M. Brucher, M. Perrot, E. Duchesnay, *J. Mach. Learn. Res.* **2011**, *12*, 2825–2830.
27. T. Q. Chen, C. Guestrin, *Kdd'16: Proceedings of the 22nd Acm Sigkdd International Conference on Knowledge Discovery and Data Mining* **2016**, *8*, 785–794.
28. H. Drucker, C. C. Burges, L. Kaufman, A. J. Smola, V. N. Vapnik, "Support Vector Regression Machines", in *Adv. Neural. Inf. Process Syst. (NIPS 1996)* **1997**, *9*, 155–161.
29. U. Stańczyk, L. C. Jain, Eds. *Feature Selection for Data and Pattern Recognition, Studies in Computational Intelligence 584*, Springer-Verlag Berlin Heidelberg, **2015**.
30. M. Skurichina, R. P. W. Duin, Bagging for linear classifiers. *Pattern Recogn.* **1998**, *31*, 909–930.
31. L., Breiman, J. H. Friedman, R. A. Olshen, C. J. Stone, *Classification, and regression trees*. Routledge, **2017**.
32. P. Geurts, D. Ernst, L. Wehenkel, *Mach. Learn.* **2006**, *63*, 3–42.
33. J. H. Friedman, *Ann. Stat.* **2001**, 1189–1232.
34. G. C. Cawley, N. L. Talbot, *Neural Process* **2002**, *16*, 293–302.
35. E. Fix, J. L. Hodges, *Int. Stat. Rev.* **1989**, *57*, 238–247.
36. G. Biau, *J. Mach. Learn. Res.* **2012**, *13*, 1063–1095.

37. C. García, J. García, M. López Martín, R. Salmerón, *J. Appl. Stat.* **2015**, *42*, 648–661.

38. Y. Zhang, L. Chen, *Theor. Econ. Lett.* **2012**, *11*, 258-267
